# Supplementary material
Source: publisher figshare collection journal article supplement (https://acs.figshare.com/ndownloader/files/7750024)
Supplement: Supplementary file 1 [file 7750024]

 
data_160739LT_0m_a
 
_audit_creation_method            SHELXL-2014/6
_chemical_name_systematic         ?
_chemical_name_common             ?
_chemical_melting_point           ?
_chemical_formula_moiety          ?
_chemical_formula_sum
 'C21 H23 Cl F N O2' 
_chemical_formula_weight          375.85

loop_
 _atom_type_symbol
 _atom_type_description
 _atom_type_scat_dispersion_real
 _atom_type_scat_dispersion_imag
 _atom_type_scat_source
 'C'  'C'   0.0033   0.0016
 'International Tables Vol C Tables 4.2.6.8 and 6.1.1.4'
 'N'  'N'   0.0061   0.0033
 'International Tables Vol C Tables 4.2.6.8 and 6.1.1.4'
 'O'  'O'   0.0106   0.0060
 'International Tables Vol C Tables 4.2.6.8 and 6.1.1.4'
 'F'  'F'   0.0171   0.0103
 'International Tables Vol C Tables 4.2.6.8 and 6.1.1.4'
 'Cl'  'Cl'   0.1484   0.1585
 'International Tables Vol C Tables 4.2.6.8 and 6.1.1.4'
 'H'  'H'   0.0000   0.0000
 'International Tables Vol C Tables 4.2.6.8 and 6.1.1.4'
 
_space_group_crystal_system       monoclinic
_space_group_IT_number            14
_space_group_name_H-M_alt         'P 21/n'
_space_group_name_Hall            '-P 2yn'
 
_shelx_space_group_comment
;
The symmetry employed for this shelxl refinement is uniquely defined
by the following loop, which should always be used as a source of
symmetry information in preference to the above space-group names.
They are only intended as comments.
;
 
loop_
 _space_group_symop_operation_xyz
 'x, y, z'
 '-x+1/2, y+1/2, -z+1/2'
 '-x, -y, -z'
 'x-1/2, -y-1/2, z-1/2'
 
_cell_length_a                    7.7503(3)
_cell_length_b                    8.9174(4)
_cell_length_c                    26.8821(11)
_cell_angle_alpha                 90
_cell_angle_beta                  90.435(2)
_cell_angle_gamma                 90
_cell_volume                      1857.84(13)
_cell_formula_units_Z             4
_cell_measurement_temperature     100(2)
_cell_measurement_reflns_used     5095
_cell_measurement_theta_min       2.7297
_cell_measurement_theta_max       26.3190
 
_exptl_crystal_description        Lump
_exptl_crystal_colour             Colorless
_exptl_crystal_density_meas       'not measured'
_exptl_crystal_density_method     'not measured'
_exptl_crystal_density_diffrn     1.344          
_exptl_crystal_F_000              792
_exptl_transmission_factor_min    ?
_exptl_transmission_factor_max    ?
_exptl_crystal_size_max           0.20
_exptl_crystal_size_mid           0.15
_exptl_crystal_size_min           0.15
_exptl_absorpt_coefficient_mu     0.230
_shelx_estimated_absorpt_T_min    ?
_shelx_estimated_absorpt_T_max    ?
_exptl_absorpt_correction_type    multi-scan
_exptl_absorpt_correction_T_min   0.8678  
_exptl_absorpt_correction_T_max   0.9485
_exptl_absorpt_process_details    'SADABS V2014/4 (Bruker AXS Inc.)'
_exptl_absorpt_special_details    ?
_diffrn_ambient_temperature       100(2)
_diffrn_radiation_wavelength      0.71073
_diffrn_radiation_type            MoK\a
_diffrn_source                    ?
_diffrn_measurement_device_type   'Bruker APEX-II CCD'
_diffrn_measurement_method        '\f and \w scans'
_diffrn_detector_area_resol_mean  8.3333
_diffrn_reflns_number             15067
_diffrn_reflns_av_unetI/netI      0.0288
_diffrn_reflns_av_R_equivalents   0.0293
_diffrn_reflns_limit_h_min        -9
_diffrn_reflns_limit_h_max        9
_diffrn_reflns_limit_k_min        -11
_diffrn_reflns_limit_k_max        9
_diffrn_reflns_limit_l_min        -33
_diffrn_reflns_limit_l_max        33
_diffrn_reflns_theta_min          1.515
_diffrn_reflns_theta_max          26.356
_diffrn_reflns_theta_full         25.242
_diffrn_measured_fraction_theta_max   0.999
_diffrn_measured_fraction_theta_full  0.999
_diffrn_reflns_Laue_measured_fraction_max    0.999
_diffrn_reflns_Laue_measured_fraction_full   0.999
_diffrn_reflns_point_group_measured_fraction_max   0.999
_diffrn_reflns_point_group_measured_fraction_full  0.999
_reflns_number_total              3804
_reflns_number_gt                 3287
_reflns_threshold_expression      'I > 2\s(I)'
_reflns_Friedel_coverage          0.000
_reflns_Friedel_fraction_max      .
_reflns_Friedel_fraction_full     .
 
_reflns_special_details
;
 Reflections were merged by SHELXL according to the crystal
 class for the calculation of statistics and refinement.
 
 _reflns_Friedel_fraction is defined as the number of unique
 Friedel pairs measured divided by the number that would be
 possible theoretically, ignoring centric projections and
 systematic absences.
;
 
_computing_data_collection        'Bruker APEX2'
_computing_cell_refinement        'SAINT V8.34A (Bruker AXS Inc., 2013)'
_computing_data_reduction         'SAINT V8.34A (Bruker AXS Inc., 2013)'
_computing_structure_solution     'SHELXS-97 (Sheldrick 2008)'
_computing_structure_refinement   'SHELXL-2014/6 (Sheldrick, 2014)'
_computing_molecular_graphics     'Bruker SHELXTL'
_computing_publication_material   'Bruker SHELXTL'
_refine_special_details           ?
_refine_ls_structure_factor_coef  Fsqd
_refine_ls_matrix_type            full
_refine_ls_weighting_scheme       calc
_refine_ls_weighting_details
'w=1/[\s^2^(Fo^2^)+(0.0485P)^2^+0.8357P] where P=(Fo^2^+2Fc^2^)/3'
_atom_sites_solution_primary      ?
_atom_sites_solution_secondary    ?
_atom_sites_solution_hydrogens    geom
_refine_ls_hydrogen_treatment     constr
_refine_ls_extinction_method      none
_refine_ls_extinction_coef        .
_refine_ls_number_reflns          3804
_refine_ls_number_parameters      236
_refine_ls_number_restraints      0
_refine_ls_R_factor_all           0.0422
_refine_ls_R_factor_gt            0.0349
_refine_ls_wR_factor_ref          0.1051
_refine_ls_wR_factor_gt           0.0949
_refine_ls_goodness_of_fit_ref    1.088
_refine_ls_restrained_S_all       1.088
_refine_ls_shift/su_max           0.001
_refine_ls_shift/su_mean          0.000
 
loop_
 _atom_site_label
 _atom_site_type_symbol
 _atom_site_fract_x
 _atom_site_fract_y
 _atom_site_fract_z
 _atom_site_U_iso_or_equiv
 _atom_site_adp_type
 _atom_site_occupancy
 _atom_site_site_symmetry_order  
 _atom_site_calc_flag
 _atom_site_refinement_flags_posn
 _atom_site_refinement_flags_adp
 _atom_site_refinement_flags_occupancy
 _atom_site_disorder_assembly
 _atom_site_disorder_group
C1 C -0.1575(2) 0.51009(17) 0.91908(6) 0.0203(3) Uani 1 1 d . . . . .
C2 C -0.1690(2) 0.59804(17) 0.87691(6) 0.0207(3) Uani 1 1 d . . . . .
H2 H -0.2601 0.6685 0.8730 0.025 Uiso 1 1 calc R U . . .
C3 C -0.0448(2) 0.58152(17) 0.84041(6) 0.0181(3) Uani 1 1 d . . . . .
H3 H -0.0514 0.6420 0.8114 0.022 Uiso 1 1 calc R U . . .
C4 C 0.08952(19) 0.47818(16) 0.84529(6) 0.0150(3) Uani 1 1 d . . . . .
C5 C 0.0990(2) 0.39517(17) 0.88924(6) 0.0210(3) Uani 1 1 d . . . . .
H5 H 0.1914 0.3265 0.8939 0.025 Uiso 1 1 calc R U . . .
C6 C -0.0230(2) 0.41046(18) 0.92629(6) 0.0237(4) Uani 1 1 d . . . . .
H6 H -0.0143 0.3536 0.9561 0.028 Uiso 1 1 calc R U . . .
C7 C 0.29495(18) 0.46213(16) 0.71394(6) 0.0150(3) Uani 1 1 d . . . . .
H7A H 0.3434 0.3595 0.7157 0.018 Uiso 1 1 calc R U . . .
H7B H 0.2454 0.4767 0.6802 0.018 Uiso 1 1 calc R U . . .
C8 C 0.15324(19) 0.47829(16) 0.75229(6) 0.0147(3) Uani 1 1 d . . . . .
H8A H 0.0609 0.4044 0.7453 0.018 Uiso 1 1 calc R U . . .
H8B H 0.1024 0.5799 0.7499 0.018 Uiso 1 1 calc R U . . .
C9 C 0.22466(18) 0.45309(15) 0.80502(6) 0.0143(3) Uani 1 1 d . . . . .
C10 C 0.37879(18) 0.55804(16) 0.81310(5) 0.0146(3) Uani 1 1 d . . . . .
H10A H 0.3367 0.6627 0.8149 0.018 Uiso 1 1 calc R U . . .
H10B H 0.4347 0.5337 0.8453 0.018 Uiso 1 1 calc R U . . .
C11 C 0.51202(19) 0.54648(16) 0.77199(6) 0.0159(3) Uani 1 1 d . . . . .
H11A H 0.6042 0.6213 0.7779 0.019 Uiso 1 1 calc R U . . .
H11B H 0.5653 0.4456 0.7728 0.019 Uiso 1 1 calc R U . . .
C12 C 0.56231(19) 0.55367(17) 0.68238(6) 0.0167(3) Uani 1 1 d . . . . .
H12A H 0.5055 0.5740 0.6500 0.020 Uiso 1 1 calc R U . . .
H12B H 0.6019 0.4481 0.6821 0.020 Uiso 1 1 calc R U . . .
C13 C 0.71906(19) 0.65598(17) 0.68774(6) 0.0180(3) Uani 1 1 d . . . . .
H13A H 0.7877 0.6239 0.7171 0.022 Uiso 1 1 calc R U . . .
H13B H 0.6791 0.7598 0.6938 0.022 Uiso 1 1 calc R U . . .
C14 C 0.83466(19) 0.65489(16) 0.64191(6) 0.0177(3) Uani 1 1 d . . . . .
H14A H 0.7636 0.6797 0.6123 0.021 Uiso 1 1 calc R U . . .
H14B H 0.9229 0.7344 0.6457 0.021 Uiso 1 1 calc R U . . .
C15 C 0.92487(19) 0.50717(16) 0.63289(6) 0.0159(3) Uani 1 1 d . . . . .
C16 C 1.04614(19) 0.49486(17) 0.58991(6) 0.0167(3) Uani 1 1 d . . . . .
C17 C 1.1265(2) 0.35693(18) 0.58163(6) 0.0210(3) Uani 1 1 d . . . . .
H17 H 1.1047 0.2755 0.6035 0.025 Uiso 1 1 calc R U . . .
C18 C 1.2375(2) 0.33697(19) 0.54209(6) 0.0244(4) Uani 1 1 d . . . . .
H18 H 1.2925 0.2433 0.5365 0.029 Uiso 1 1 calc R U . . .
C19 C 1.2655(2) 0.4568(2) 0.51114(6) 0.0226(4) Uani 1 1 d . . . . .
C20 C 1.1918(2) 0.59592(19) 0.51804(6) 0.0220(3) Uani 1 1 d . . . . .
H20 H 1.2163 0.6768 0.4962 0.026 Uiso 1 1 calc R U . . .
C21 C 1.08079(19) 0.61419(17) 0.55785(6) 0.0190(3) Uani 1 1 d . . . . .
H21 H 1.0279 0.7088 0.5634 0.023 Uiso 1 1 calc R U . . .
Cl1 Cl -0.32037(6) 0.52083(5) 0.96374(2) 0.03091(14) Uani 1 1 d . . . . .
F1 F 1.36844(13) 0.43706(12) 0.47095(4) 0.0319(3) Uani 1 1 d . . . . .
N1 N 0.43418(15) 0.57228(13) 0.72237(5) 0.0141(3) Uani 1 1 d . . . . .
O1 O 0.29120(13) 0.30376(11) 0.80879(4) 0.0162(2) Uani 1 1 d . . . . .
H1 H 0.2179 0.2429 0.7976 0.024 Uiso 1 1 calc R U . . .
O2 O 0.90363(14) 0.39910(12) 0.66010(4) 0.0195(2) Uani 1 1 d . . . . .
 
loop_
 _atom_site_aniso_label
 _atom_site_aniso_U_11
 _atom_site_aniso_U_22
 _atom_site_aniso_U_33
 _atom_site_aniso_U_23
 _atom_site_aniso_U_13
 _atom_site_aniso_U_12
C1 0.0203(8) 0.0188(7) 0.0219(8) -0.0034(6) 0.0068(6) -0.0037(6)
C2 0.0177(8) 0.0174(7) 0.0272(9) -0.0006(6) 0.0021(6) 0.0029(6)
C3 0.0191(8) 0.0157(7) 0.0195(8) 0.0026(6) 0.0002(6) 0.0006(6)
C4 0.0145(7) 0.0124(6) 0.0182(7) -0.0010(6) -0.0008(6) -0.0025(6)
C5 0.0207(8) 0.0212(8) 0.0212(8) 0.0031(6) -0.0001(6) 0.0059(6)
C6 0.0285(9) 0.0233(8) 0.0196(8) 0.0044(6) 0.0032(7) 0.0019(7)
C7 0.0132(7) 0.0136(7) 0.0181(7) -0.0017(6) -0.0018(6) -0.0014(6)
C8 0.0122(7) 0.0136(7) 0.0183(8) 0.0002(6) -0.0006(6) -0.0015(5)
C9 0.0135(7) 0.0109(6) 0.0184(8) 0.0008(6) 0.0001(6) 0.0016(5)
C10 0.0136(7) 0.0136(7) 0.0166(7) -0.0005(6) -0.0018(6) 0.0000(6)
C11 0.0128(7) 0.0156(7) 0.0193(8) -0.0015(6) -0.0023(6) -0.0001(6)
C12 0.0139(7) 0.0171(7) 0.0193(8) -0.0046(6) 0.0015(6) -0.0007(6)
C13 0.0148(7) 0.0175(7) 0.0216(8) -0.0049(6) 0.0015(6) -0.0010(6)
C14 0.0144(7) 0.0169(7) 0.0219(8) -0.0014(6) 0.0014(6) -0.0023(6)
C15 0.0125(7) 0.0191(7) 0.0160(7) -0.0026(6) -0.0041(6) -0.0021(6)
C16 0.0131(7) 0.0212(7) 0.0157(7) -0.0032(6) -0.0035(6) -0.0016(6)
C17 0.0225(8) 0.0222(8) 0.0182(8) -0.0003(6) -0.0011(6) 0.0021(6)
C18 0.0229(8) 0.0269(8) 0.0233(8) -0.0062(7) -0.0005(7) 0.0044(7)
C19 0.0155(8) 0.0364(9) 0.0159(8) -0.0075(7) 0.0022(6) -0.0042(7)
C20 0.0193(8) 0.0272(8) 0.0196(8) 0.0005(7) 0.0006(6) -0.0085(7)
C21 0.0155(7) 0.0210(7) 0.0204(8) -0.0022(6) -0.0021(6) -0.0027(6)
Cl1 0.0320(3) 0.0294(2) 0.0316(3) 0.00087(18) 0.01744(19) 0.00158(18)
F1 0.0255(5) 0.0483(6) 0.0222(5) -0.0113(5) 0.0088(4) -0.0053(5)
N1 0.0119(6) 0.0139(6) 0.0164(6) -0.0024(5) 0.0001(5) -0.0015(5)
O1 0.0157(5) 0.0103(5) 0.0225(6) 0.0003(4) -0.0013(4) 0.0010(4)
O2 0.0183(5) 0.0208(5) 0.0193(6) 0.0032(4) -0.0002(4) 0.0012(4)
 
_geom_special_details
;
 All esds (except the esd in the dihedral angle between two l.s. planes)
 are estimated using the full covariance matrix.  The cell esds are taken
 into account individually in the estimation of esds in distances, angles
 and torsion angles; correlations between esds in cell parameters are only
 used when they are defined by crystal symmetry.  An approximate (isotropic)
 treatment of cell esds is used for estimating esds involving l.s. planes.
;
 
loop_
 _geom_bond_atom_site_label_1
 _geom_bond_atom_site_label_2
 _geom_bond_distance
 _geom_bond_site_symmetry_2
 _geom_bond_publ_flag
C1 C2 1.381(2) . ?
C1 C6 1.383(2) . ?
C1 Cl1 1.7510(16) . ?
C2 C3 1.387(2) . ?
C2 H2 0.9500 . ?
C3 C4 1.396(2) . ?
C3 H3 0.9500 . ?
C4 C5 1.396(2) . ?
C4 C9 1.528(2) . ?
C5 C6 1.385(2) . ?
C5 H5 0.9500 . ?
C6 H6 0.9500 . ?
C7 N1 1.4755(18) . ?
C7 C8 1.519(2) . ?
C7 H7A 0.9900 . ?
C7 H7B 0.9900 . ?
C8 C9 1.534(2) . ?
C8 H8A 0.9900 . ?
C8 H8B 0.9900 . ?
C9 O1 1.4313(16) . ?
C9 C10 1.532(2) . ?
C10 C11 1.522(2) . ?
C10 H10A 0.9900 . ?
C10 H10B 0.9900 . ?
C11 N1 1.4778(19) . ?
C11 H11A 0.9900 . ?
C11 H11B 0.9900 . ?
C12 N1 1.4784(19) . ?
C12 C13 1.525(2) . ?
C12 H12A 0.9900 . ?
C12 H12B 0.9900 . ?
C13 C14 1.529(2) . ?
C13 H13A 0.9900 . ?
C13 H13B 0.9900 . ?
C14 C15 1.512(2) . ?
C14 H14A 0.9900 . ?
C14 H14B 0.9900 . ?
C15 O2 1.2217(18) . ?
C15 C16 1.499(2) . ?
C16 C21 1.397(2) . ?
C16 C17 1.397(2) . ?
C17 C18 1.384(2) . ?
C17 H17 0.9500 . ?
C18 C19 1.373(2) . ?
C18 H18 0.9500 . ?
C19 F1 1.3592(18) . ?
C19 C20 1.379(2) . ?
C20 C21 1.388(2) . ?
C20 H20 0.9500 . ?
C21 H21 0.9500 . ?
O1 H1 0.8400 . ?
 
loop_
 _geom_angle_atom_site_label_1
 _geom_angle_atom_site_label_2
 _geom_angle_atom_site_label_3
 _geom_angle
 _geom_angle_site_symmetry_1
 _geom_angle_site_symmetry_3
 _geom_angle_publ_flag
C2 C1 C6 121.59(15) . . ?
C2 C1 Cl1 119.31(12) . . ?
C6 C1 Cl1 119.07(13) . . ?
C1 C2 C3 118.66(14) . . ?
C1 C2 H2 120.7 . . ?
C3 C2 H2 120.7 . . ?
C2 C3 C4 121.64(14) . . ?
C2 C3 H3 119.2 . . ?
C4 C3 H3 119.2 . . ?
C5 C4 C3 117.65(14) . . ?
C5 C4 C9 119.34(13) . . ?
C3 C4 C9 123.01(13) . . ?
C6 C5 C4 121.65(14) . . ?
C6 C5 H5 119.2 . . ?
C4 C5 H5 119.2 . . ?
C1 C6 C5 118.72(15) . . ?
C1 C6 H6 120.6 . . ?
C5 C6 H6 120.6 . . ?
N1 C7 C8 111.37(11) . . ?
N1 C7 H7A 109.4 . . ?
C8 C7 H7A 109.4 . . ?
N1 C7 H7B 109.4 . . ?
C8 C7 H7B 109.4 . . ?
H7A C7 H7B 108.0 . . ?
C7 C8 C9 110.82(12) . . ?
C7 C8 H8A 109.5 . . ?
C9 C8 H8A 109.5 . . ?
C7 C8 H8B 109.5 . . ?
C9 C8 H8B 109.5 . . ?
H8A C8 H8B 108.1 . . ?
O1 C9 C4 109.54(11) . . ?
O1 C9 C10 106.15(11) . . ?
C4 C9 C10 110.37(12) . . ?
O1 C9 C8 109.21(12) . . ?
C4 C9 C8 112.86(12) . . ?
C10 C9 C8 108.48(12) . . ?
C11 C10 C9 112.86(12) . . ?
C11 C10 H10A 109.0 . . ?
C9 C10 H10A 109.0 . . ?
C11 C10 H10B 109.0 . . ?
C9 C10 H10B 109.0 . . ?
H10A C10 H10B 107.8 . . ?
N1 C11 C10 111.74(11) . . ?
N1 C11 H11A 109.3 . . ?
C10 C11 H11A 109.3 . . ?
N1 C11 H11B 109.3 . . ?
C10 C11 H11B 109.3 . . ?
H11A C11 H11B 107.9 . . ?
N1 C12 C13 113.77(12) . . ?
N1 C12 H12A 108.8 . . ?
C13 C12 H12A 108.8 . . ?
N1 C12 H12B 108.8 . . ?
C13 C12 H12B 108.8 . . ?
H12A C12 H12B 107.7 . . ?
C12 C13 C14 113.03(12) . . ?
C12 C13 H13A 109.0 . . ?
C14 C13 H13A 109.0 . . ?
C12 C13 H13B 109.0 . . ?
C14 C13 H13B 109.0 . . ?
H13A C13 H13B 107.8 . . ?
C15 C14 C13 114.16(12) . . ?
C15 C14 H14A 108.7 . . ?
C13 C14 H14A 108.7 . . ?
C15 C14 H14B 108.7 . . ?
C13 C14 H14B 108.7 . . ?
H14A C14 H14B 107.6 . . ?
O2 C15 C16 119.46(13) . . ?
O2 C15 C14 121.79(14) . . ?
C16 C15 C14 118.74(13) . . ?
C21 C16 C17 118.97(15) . . ?
C21 C16 C15 122.99(14) . . ?
C17 C16 C15 118.04(14) . . ?
C18 C17 C16 121.06(15) . . ?
C18 C17 H17 119.5 . . ?
C16 C17 H17 119.5 . . ?
C19 C18 C17 117.88(15) . . ?
C19 C18 H18 121.1 . . ?
C17 C18 H18 121.1 . . ?
F1 C19 C18 118.50(15) . . ?
F1 C19 C20 118.03(15) . . ?
C18 C19 C20 123.46(15) . . ?
C19 C20 C21 117.99(15) . . ?
C19 C20 H20 121.0 . . ?
C21 C20 H20 121.0 . . ?
C20 C21 C16 120.64(15) . . ?
C20 C21 H21 119.7 . . ?
C16 C21 H21 119.7 . . ?
C7 N1 C11 109.15(11) . . ?
C7 N1 C12 107.94(11) . . ?
C11 N1 C12 111.53(11) . . ?
C9 O1 H1 109.5 . . ?
 
_refine_diff_density_max    0.307
_refine_diff_density_min   -0.232
_refine_diff_density_rms    0.058

_shelxl_version_number 2014/6

_shelx_res_file
;
TITL 160739LT_0m_a.res in P2(1)/n
CELL  0.71073   7.7503   8.9174  26.8821   90.000   90.435   90.000
ZERR    4.000   0.0003   0.0004   0.0011    0.000    0.002    0.000
LATT 1
SYMM 1/2-X, 1/2+Y, 1/2-Z
SFAC C  N  O  F  Cl H
UNIT 84  4  8  4  4  92
L.S. 4
ACTA
BOND $H
FMAP 2
PLAN 5
TEMP -173.000
WGHT    0.048500    0.835700
FVAR       0.69482
C1    1   -0.157542    0.510086    0.919078    11.00000    0.02033    0.01878 =
         0.02191   -0.00336    0.00685   -0.00369
C2    1   -0.169007    0.598041    0.876911    11.00000    0.01766    0.01740 =
         0.02720   -0.00056    0.00214    0.00288
AFIX  43
H2    6   -0.260078    0.668451    0.872971    11.00000   -1.20000
AFIX   0
C3    1   -0.044839    0.581518    0.840410    11.00000    0.01913    0.01572 =
         0.01955    0.00263    0.00021    0.00062
AFIX  43
H3    6   -0.051418    0.642039    0.811374    11.00000   -1.20000
AFIX   0
C4    1    0.089517    0.478176    0.845287    11.00000    0.01452    0.01237 =
         0.01825   -0.00103   -0.00085   -0.00254
C5    1    0.099011    0.395174    0.889235    11.00000    0.02068    0.02122 =
         0.02120    0.00314   -0.00014    0.00589
AFIX  43
H5    6    0.191431    0.326468    0.893852    11.00000   -1.20000
AFIX   0
C6    1   -0.022954    0.410464    0.926293    11.00000    0.02845    0.02325 =
         0.01958    0.00442    0.00322    0.00195
AFIX  43
H6    6   -0.014294    0.353598    0.956091    11.00000   -1.20000
AFIX   0
C7    1    0.294948    0.462127    0.713940    11.00000    0.01320    0.01358 =
         0.01813   -0.00170   -0.00175   -0.00144
AFIX  23
H7A   6    0.343385    0.359518    0.715687    11.00000   -1.20000
H7B   6    0.245414    0.476673    0.680230    11.00000   -1.20000
AFIX   0
C8    1    0.153237    0.478290    0.752285    11.00000    0.01224    0.01357 =
         0.01830    0.00017   -0.00061   -0.00149
AFIX  23
H8A   6    0.060860    0.404402    0.745283    11.00000   -1.20000
H8B   6    0.102365    0.579903    0.749946    11.00000   -1.20000
AFIX   0
C9    1    0.224658    0.453086    0.805016    11.00000    0.01353    0.01086 =
         0.01837    0.00075    0.00006    0.00163
C10   1    0.378794    0.558039    0.813096    11.00000    0.01364    0.01357 =
         0.01660   -0.00048   -0.00176    0.00003
AFIX  23
H10A  6    0.336666    0.662686    0.814926    11.00000   -1.20000
H10B  6    0.434713    0.533687    0.845329    11.00000   -1.20000
AFIX   0
C11   1    0.512019    0.546477    0.771987    11.00000    0.01277    0.01565 =
         0.01927   -0.00145   -0.00235   -0.00006
AFIX  23
H11A  6    0.604233    0.621325    0.777935    11.00000   -1.20000
H11B  6    0.565341    0.445618    0.772847    11.00000   -1.20000
AFIX   0
C12   1    0.562311    0.553674    0.682377    11.00000    0.01387    0.01707 =
         0.01927   -0.00461    0.00145   -0.00072
AFIX  23
H12A  6    0.505463    0.574036    0.649972    11.00000   -1.20000
H12B  6    0.601938    0.448138    0.682096    11.00000   -1.20000
AFIX   0
C13   1    0.719062    0.655977    0.687745    11.00000    0.01480    0.01746 =
         0.02163   -0.00486    0.00154   -0.00102
AFIX  23
H13A  6    0.787707    0.623869    0.717070    11.00000   -1.20000
H13B  6    0.679143    0.759773    0.693844    11.00000   -1.20000
AFIX   0
C14   1    0.834665    0.654888    0.641912    11.00000    0.01435    0.01688 =
         0.02193   -0.00143    0.00138   -0.00227
AFIX  23
H14A  6    0.763570    0.679690    0.612287    11.00000   -1.20000
H14B  6    0.922906    0.734421    0.645714    11.00000   -1.20000
AFIX   0
C15   1    0.924869    0.507170    0.632890    11.00000    0.01251    0.01912 =
         0.01596   -0.00261   -0.00407   -0.00211
C16   1    1.046137    0.494858    0.589906    11.00000    0.01308    0.02117 =
         0.01567   -0.00322   -0.00347   -0.00162
C17   1    1.126527    0.356925    0.581629    11.00000    0.02253    0.02223 =
         0.01822   -0.00031   -0.00108    0.00209
AFIX  43
H17   6    1.104658    0.275546    0.603499    11.00000   -1.20000
AFIX   0
C18   1    1.237482    0.336974    0.542086    11.00000    0.02291    0.02694 =
         0.02330   -0.00616   -0.00047    0.00442
AFIX  43
H18   6    1.292493    0.243319    0.536534    11.00000   -1.20000
AFIX   0
C19   1    1.265525    0.456841    0.511136    11.00000    0.01548    0.03637 =
         0.01588   -0.00754    0.00222   -0.00417
C20   1    1.191836    0.595921    0.518035    11.00000    0.01929    0.02719 =
         0.01965    0.00048    0.00061   -0.00851
AFIX  43
H20   6    1.216310    0.676812    0.496201    11.00000   -1.20000
AFIX   0
C21   1    1.080792    0.614193    0.557852    11.00000    0.01553    0.02097 =
         0.02044   -0.00222   -0.00206   -0.00272
AFIX  43
H21   6    1.027859    0.708779    0.563350    11.00000   -1.20000
AFIX   0
CL1   5   -0.320370    0.520828    0.963737    11.00000    0.03200    0.02944 =
         0.03156    0.00087    0.01744    0.00158
F1    4    1.368437    0.437061    0.470949    11.00000    0.02545    0.04831 =
         0.02222   -0.01128    0.00879   -0.00530
N1    2    0.434185    0.572284    0.722369    11.00000    0.01186    0.01390 =
         0.01642   -0.00238    0.00010   -0.00147
O1    3    0.291204    0.303760    0.808795    11.00000    0.01574    0.01026 =
         0.02252    0.00032   -0.00135    0.00097
AFIX 147
H1    6    0.217900    0.242892    0.797584    11.00000   -1.50000
AFIX   0
O2    3    0.903633    0.399097    0.660098    11.00000    0.01831    0.02077 =
         0.01929    0.00324   -0.00015    0.00121
HKLF 4

REM  160739LT_0m_a.res in P2(1)/n
REM R1 =  0.0349 for    3287 Fo > 4sig(Fo)  and  0.0422 for all    3804 data
REM    236 parameters refined using      0 restraints

END

WGHT      0.0485      0.8357

REM Highest difference peak  0.307,  deepest hole -0.232,  1-sigma level  0.058
Q1    1   0.1449  0.4618  0.8245  11.00000  0.05    0.31
Q2    1  -0.1181  0.4347  0.9174  11.00000  0.05    0.31
Q3    1   0.1882  0.4654  0.7790  11.00000  0.05    0.29
Q4    1  -0.2226  0.5139  0.9424  11.00000  0.05    0.28
Q5    1   0.0797  0.4209  0.8623  11.00000  0.05    0.28
;
_shelx_res_checksum   94949

_shelx_hkl_file
;
   1   0   0   -2.37    0.23
   1   0   0   -2.16    0.21
  -1   0   0   -2.40    0.18
  -1   0   0   -2.43    0.15
  -2   0   0 1526.22   39.55
   2   0   0 1513.97   39.70
   3   0   0   -0.20    0.59
  -3   0   0   -0.26    0.69
  -4   0   0  400.91   14.23
   4   0   0  391.96   14.44
   5   0   0    0.32    1.29
  -5   0   0    3.36    1.74
  -6   0   0   15.70    3.37
   6   0   0   17.13    3.74
  -7   0   0    1.98    2.05
   7   0   0    1.19    2.00
   8   0   0  238.69   13.94
  -8   0   0  249.48   13.69
   9   0   0    0.72    2.72
  -9   0   0   -0.60    2.55
   0  -1   0    0.00    0.17
   0  -1   0   -0.05    0.15
   0   1   0   -0.11    0.10
   0   1   0   -0.17    0.13
  -1  -1   0 1698.71   43.48
   1  -1   0 1739.40   43.22
  -1  -1   0 1811.84   43.73
   1  -1   0 1708.56   43.47
  -1  -1   0 1836.58   43.88
  -1   1   0 1631.61   43.35
  -1   1   0 1725.17   43.12
   1   1   0 1753.96   43.73
   1   1   0 1743.82   43.37
   1   1   0 1731.43   43.91
   1   1   0 1726.92   44.09
   2  -1   0    0.05    0.62
  -2  -1   0   -0.40    0.62
  -2  -1   0   -0.06    0.63
   2  -1   0    0.43    0.67
   2   1   0    0.66    0.73
  -2   1   0   -0.15    0.55
  -3  -1   0  183.92    7.80
   3  -1   0  178.33    7.75
  -3   1   0  189.31    7.44
   3   1   0  181.14    7.68
   4  -1   0  115.98    6.66
  -4  -1   0  114.10    6.53
   4   1   0  111.56    6.48
  -4   1   0  121.46    6.34
  -5  -1   0  608.35   21.24
   5  -1   0  647.48   21.88
   5   1   0  628.09   21.46
  -5   1   0  639.88   20.89
  -6  -1   0  188.05   10.38
   6  -1   0  198.64   10.88
  -6   1   0  197.58   10.15
   6   1   0  187.13   10.43
  -7  -1   0    2.46    2.50
   7  -1   0    3.01    2.35
   7   1   0    4.59    2.82
  -7   1   0    4.90    2.53
   8  -1   0   96.31   10.49
  -8  -1   0   94.09    9.77
   8   1   0  111.63   10.71
  -8   1   0  102.45   10.38
   9  -1   0   45.47    7.71
  -9  -1   0   38.57    6.88
   9   1   0   43.65    7.52
  -1  -2   0 7814.18  194.30
  -1  -2   0 7882.67  193.55
   1   2   0 7797.66  194.02
   1   2   0 7839.41  193.91
   2  -2   0  471.37   13.75
   2  -2   0  484.64   14.15
  -2  -2   0  486.79   14.30
  -2  -2   0  466.77   14.34
   2   2   0  491.71   15.36
  -2   2   0  486.83   13.28
   2   2   0  473.59   13.84
   2   2   0  462.68   14.88
  -2   2   0  424.14   13.07
   3  -2   0 1153.66   31.71
  -3  -2   0 1140.01   31.82
   3  -2   0 1096.65   31.32
  -3   2   0 1142.29   29.26
  -3   2   0 1141.01   30.62
   3   2   0 1121.07   31.21
   4  -2   0  456.30   16.47
  -4  -2   0  491.37   16.76
  -4   2   0  481.43   15.61
   4   2   0  449.57   16.01
  -4   2   0  486.50   13.32
  -5  -2   0   46.70    5.54
   5  -2   0   43.39    5.21
  -5   2   0   48.63    5.10
   5   2   0   46.99    5.34
  -5   2   0   46.70    2.52
   6  -2   0   27.22    4.72
  -6  -2   0   32.19    5.08
   6   2   0   40.21    5.47
  -6   2   0   30.91    2.07
  -6   2   0   32.65    4.60
   7  -2   0   20.63    4.83
  -7  -2   0   19.45    4.34
  -7  -2   0   18.43    3.37
   7   2   0   16.58    4.19
  -7   2   0   24.68    4.31
   8  -2   0  154.28   11.16
  -8  -2   0  154.06   10.81
   8   2   0  150.37   12.91
  -9  -2   0   67.70    9.13
   9  -2   0   59.07    8.91
   9   2   0   65.59   13.40
   0  -3   0    1.77    0.98
   0  -3   0    0.16    0.71
  -1  -3   0  771.35   23.23
  -1  -3   0  775.76   20.13
   1  -3   0  782.68   21.87
   1  -3   0  767.99   19.40
  -1  -3   0  784.35   22.72
   1  -3   0  772.68   19.70
  -1  -3   0  781.95   22.91
  -1   3   0  774.72   22.04
   1   3   0  755.16   23.15
  -2  -3   0    4.10    1.19
   2  -3   0    4.56    1.09
  -2  -3   0    3.45    1.34
   2  -3   0    7.50    1.49
  -2  -3   0    3.48    1.25
   2  -3   0    3.73    1.03
  -2  -3   0    7.25    1.77
  -2  -3   0    5.49    1.59
  -2   3   0    4.14    1.24
   2   3   0    6.91    1.99
  -2   3   0    5.50    0.86
   3  -3   0  443.31   14.07
   3  -3   0  444.88   14.39
  -3  -3   0  405.92   14.44
  -3  -3   0  430.91   14.53
  -3   3   0  423.38   13.02
   3   3   0  419.99   15.92
   3   3   0  406.01   13.58
  -4  -3   0   23.04    3.49
   4  -3   0   28.77    3.88
  -4   3   0   37.33    3.62
   4   3   0   27.57    3.58
   4   3   0   31.98    4.66
  -4   3   0   29.73    2.78
  -5  -3   0   34.42    4.64
   5  -3   0   50.98    5.87
  -5   3   0   55.30    5.25
   5   3   0   44.04    6.00
  -5   3   0   46.22    2.93
   5   3   0   47.74    5.31
  -6  -3   0    5.81    2.41
   6  -3   0    9.28    2.91
  -6  -3   0    5.33    2.47
  -6   3   0    9.35    1.54
  -6   3   0    4.84    1.95
   6   3   0   10.33    2.89
   7  -3   0   67.64    8.05
  -7  -3   0   65.40    6.71
  -7  -3   0   58.94    7.33
   7   3   0   67.67    7.68
   8  -3   0    5.17    3.12
  -8  -3   0    4.35    3.16
  -9  -3   0    5.71    3.94
   9  -3   0    3.14    3.51
   0  -4   0   78.41    4.91
   0  -4   0   71.39    5.21
  -1  -4   0   74.24    2.93
  -1  -4   0   73.29    5.15
  -1  -4   0   69.19    4.87
  -1  -4   0   72.19    5.32
   1  -4   0   73.85    4.59
   1   4   0   71.21    5.25
  -1   4   0   77.83    4.82
  -2  -4   0  205.56    7.87
   2  -4   0  191.61    6.80
   2  -4   0  209.89    7.42
  -2  -4   0  202.33    7.55
  -2  -4   0  203.78    9.52
   2  -4   0  208.74    8.14
  -2  -4   0  193.85    9.13
  -2  -4   0  230.61    9.54
   2   4   0  193.57    9.78
  -2   4   0  199.03    8.36
   2   4   0  185.84    6.57
  -3  -4   0    0.72    1.08
  -3  -4   0    3.01    1.69
   3  -4   0    2.39    1.18
  -3  -4   0    2.65    1.35
   3  -4   0    1.66    1.18
  -3   4   0    1.44    1.00
   3   4   0    6.09    2.18
   3   4   0   -0.47    0.36
  -3   4   0    4.06    0.92
   4  -4   0   41.77    4.70
  -4  -4   0   48.67    5.49
   4  -4   0   46.82    5.02
  -4  -4   0   44.73    4.90
  -4   4   0   45.51    4.05
   4   4   0   44.33    4.41
   4   4   0   34.50    5.19
  -5  -4   0   37.36    5.06
  -5  -4   0   47.90    5.85
   5  -4   0   45.38    5.68
  -5   4   0   42.58    3.81
   5   4   0   60.07    7.57
   5   4   0   44.40    5.09
  -5   4   0   43.05    4.27
   6  -4   0  165.45    9.91
  -6  -4   0  137.06    8.70
  -6  -4   0  154.77    9.69
  -6   4   0  143.10    6.28
   6   4   0  147.43    8.78
   6   4   0  173.31   11.64
  -7  -4   0   91.62    9.37
   7  -4   0   75.41    8.66
   8  -4   0   73.30    8.97
  -8  -4   0   91.48    9.94
   9  -4   0    7.37    4.50
  -9  -4   0   13.01    4.59
   0  -5   0    2.28    1.47
   0  -5   0    7.65    2.26
  -1  -5   0  200.47    9.69
  -1  -5   0  183.03    9.70
   1  -5   0  197.93    9.05
   1  -5   0  227.62   10.82
  -1  -5   0  193.54   10.18
  -1  -5   0  201.87    6.24
   1   5   0  194.85   10.02
   2  -5   0   77.17    3.60
  -2  -5   0   85.71    6.09
  -2  -5   0   84.63    7.76
  -2  -5   0   80.59    4.27
  -2  -5   0   78.64    4.46
   2  -5   0   79.11    5.13
   2  -5   0   76.97    3.99
  -2  -5   0   67.89    6.64
   2   5   0   74.60    7.27
   3  -5   0  431.40   14.20
   3  -5   0  434.84   14.60
  -3  -5   0  463.05   17.30
  -3  -5   0  451.89   15.23
  -3  -5   0  454.41   16.62
  -3  -5   0  427.52   15.08
  -3   5   0  417.45   15.19
   3   5   0  423.79   18.03
   4  -5   0  394.68   14.74
  -4  -5   0  416.19   15.42
   4  -5   0  418.29   15.16
  -4  -5   0  409.73   16.59
   4   5   0  392.50   13.61
   4   5   0  390.96   18.07
  -4   5   0  402.15   14.34
   5  -5   0  389.27   15.76
  -5  -5   0  368.28   15.60
  -5   5   0  385.25   13.56
   5   5   0  368.32   18.19
  -6  -5   0    3.88    2.53
   6  -5   0    3.35    2.46
   6   5   0    2.40    2.54
  -7  -5   0   56.70    7.62
   7  -5   0   62.48    7.82
  -8  -5   0   69.98    9.14
   8  -5   0   55.91    7.93
   0  -6   0   57.35    6.16
   0  -6   0   68.92    7.47
  -1  -6   0 1517.60   44.64
   1  -6   0 1536.52   46.15
   1  -6   0 1537.47   43.78
  -1  -6   0 1544.82   46.03
  -1  -6   0 1532.91   38.74
  -1  -6   0 1472.61   45.09
   1   6   0 1560.56   45.74
   2  -6   0 1110.12   28.50
  -2  -6   0 1076.20   29.40
   2  -6   0 1074.19   27.82
  -2  -6   0 1040.85   34.11
  -2  -6   0 1005.99   33.16
   2  -6   0  996.09   31.26
  -2  -6   0 1015.62   28.90
  -2  -6   0 1083.96   33.52
   2   6   0 1075.25   34.82
  -3  -6   0   49.38    5.04
   3  -6   0   56.86    4.88
  -3  -6   0   56.40    5.16
   3  -6   0   57.70    5.45
  -3  -6   0   52.78    6.02
   3  -6   0   52.53    3.81
  -3  -6   0   56.73    6.43
   3   6   0   66.50    8.15
  -4  -6   0   33.40    4.53
   4  -6   0   26.50    3.86
   4   6   0   25.91    5.73
   5  -6   0   51.13    6.10
  -5  -6   0   48.05    6.20
   5   6   0   48.03    7.78
  -6  -6   0   95.92    9.40
   6  -6   0  101.88    9.46
   7  -6   0   71.67    8.52
  -7  -6   0   81.00    9.14
   8  -6   0    8.84    4.00
  -8  -6   0   20.43    5.36
   0  -7   0    2.68    2.11
  -1  -7   0  478.08   13.47
  -1  -7   0  485.07   13.92
   1  -7   0  498.21   20.93
  -1  -7   0  471.58   20.27
  -1  -7   0  446.50   19.39
  -2  -7   0    5.75    2.62
  -2  -7   0    0.53    1.06
  -2  -7   0    3.29    2.24
   2  -7   0    2.08    0.91
   2  -7   0    1.33    0.94
   2  -7   0    1.58    1.88
   2  -7   0    2.41    2.16
  -2  -7   0    0.21    1.13
   2   7   0    1.17    2.01
   3  -7   0    6.79    2.45
  -3  -7   0    5.56    2.75
  -3  -7   0    7.20    2.19
  -3  -7   0   12.07    3.77
   3  -7   0    5.69    1.78
   3   7   0    3.40    2.67
  -4  -7   0  276.67   12.18
   4  -7   0  255.14   11.32
   4   7   0  267.04   15.76
  -5  -7   0  237.89   12.12
   5  -7   0  244.20   11.85
   5   7   0  217.05   15.26
   6  -7   0  171.52   10.64
  -6  -7   0  151.73   10.22
  -7  -7   0    1.66    2.30
   7  -7   0    1.92    2.80
   0  -8   0    5.02    3.18
   0  -8   0    9.71    4.17
  -1  -8   0 1470.97   46.32
  -1  -8   0 1448.32   37.68
  -1  -8   0 1432.32   37.42
   1  -8   0 1421.49   47.57
  -1  -8   0 1480.58   47.43
   2  -8   0    3.36    1.27
  -2  -8   0    3.69    1.63
  -2  -8   0    6.42    3.10
  -2  -8   0    2.58    2.76
   2   8   0    7.20    3.22
   3  -8   0    7.56    2.07
  -3  -8   0    6.88    3.11
  -3  -8   0    8.65    2.25
   3   8   0   13.16    4.49
   4  -8   0  197.23    9.79
  -4  -8   0  211.55   10.54
   4   8   0  229.92   21.00
   5  -8   0    2.82    2.00
  -5  -8   0    7.48    2.85
   6  -8   0   23.23    4.92
  -6  -8   0   18.50    4.50
   0  -9   0   -0.47    2.48
  -1  -9   0  834.70   31.81
  -1  -9   0  840.33   22.91
  -2  -9   0   16.31    2.58
  -2  -9   0    6.39    3.24
   2  -9   0   14.21    2.07
   3  -9   0    2.28    1.43
  -3  -9   0    1.06    2.54
  -3  -9   0    1.54    1.66
  -4  -9   0    7.02    2.56
   4  -9   0    5.28    2.26
   5  -9   0   98.55    8.78
  -5  -9   0  102.64    9.36
   0 -10   0    9.10    4.38
  -1 -10   0  207.57   14.34
  -1 -10   0  221.98    7.62
   2 -10   0   56.36    3.23
  -2 -10   0   51.55    8.45
  -2 -10   0   45.29    4.27
   3 -10   0   16.53    2.74
  -3 -10   0    9.63    4.03
  -3 -10   0   17.66    3.15
  -4 -10   0   54.09    6.26
   4 -10   0   59.44    5.96
   0 -11   0   -2.50    2.74
   1 -11   0  265.60   18.20
  -1 -11   0  284.40   17.71
  -9   0   1  100.86   10.88
   9   0  -1  138.83   13.14
  -8   0   1    1.96    2.47
   8   0  -1    2.62    2.52
   7   0  -1  600.56   23.31
  -7   0   1  587.96   22.54
  -6   0   1   -1.28    1.38
   6   0  -1    0.05    1.58
   5   0  -1  192.02    9.71
  -5   0   1  172.62    9.06
   4   0  -1   -0.35    0.99
  -4   0   1   -0.57    0.80
  -3   0   1 1675.08   45.27
   3   0  -1 1722.87   45.57
   2   0  -1   -0.04    0.53
  -2   0   1   -0.52    0.53
   1   0  -1 1063.99   27.46
   0   0   1   -0.01    0.04
   0   0   1   -0.02    0.04
   0   0  -1   -0.02    0.04
   0   0  -1   -0.01    0.03
   1   0   1  219.48    6.62
   2   0   1    1.32    0.75
  -2   0  -1   -0.54    0.46
   3   0   1  127.32    6.23
  -3   0  -1  147.94    6.40
   4   0   1   -0.41    0.74
  -4   0  -1   -0.86    0.89
   5   0   1   53.80    5.64
  -5   0  -1   57.76    5.64
  -6   0  -1    0.78    1.59
   6   0   1    0.05    1.66
   7   0   1   16.63    4.02
  -7   0  -1   14.92    3.61
   8   0   1    2.73    2.31
  -8   0  -1    2.24    2.40
  -9   0  -1   21.11    5.40
   9   0   1   19.11    5.10
   9  -1  -1   25.87    6.32
  -9  -1   1   19.88    5.28
   9   1  -1   23.58    5.64
  -8  -1   1   67.21    8.17
   8  -1  -1   64.66    8.70
   8   1  -1   55.01    7.79
  -8   1   1   64.95    8.29
   7  -1  -1   22.99    5.01
  -7  -1   1   28.18    4.94
  -7   1   1   29.15    5.12
   7   1  -1   25.68    4.92
   6  -1  -1  879.00   29.50
  -6  -1   1  876.32   29.07
   6   1  -1  864.95   29.05
  -6   1   1  900.38   28.53
   5  -1  -1  181.27    9.57
  -5  -1   1  188.35    9.55
   5   1  -1  188.65    9.51
  -5   1   1  163.35    8.65
   4  -1  -1   -0.66    0.95
  -4  -1   1    2.56    1.44
  -4   1   1    0.44    0.95
   4   1  -1   -0.13    1.24
  -3  -1   1  270.88   10.14
   3  -1  -1  254.56    9.93
  -3   1   1  269.70    9.63
   3   1  -1  253.50    9.79
   2  -1  -1    3.36    1.04
   2  -1  -1    2.13    0.82
  -2  -1   1    2.70    0.98
  -2  -1   1    0.92    0.63
  -2   1   1    2.04    0.78
   2   1  -1    0.05    0.55
   1  -1  -1  357.05    9.93
  -1  -1   1  352.78   10.35
   1  -1  -1  360.52   10.13
  -1  -1   1  356.63   10.12
  -1   1   1  310.73    9.63
   1   1  -1  358.34   10.20
   1   1  -1  358.06   10.76
  -1   1   1  348.85   10.03
   1   1  -1  365.60   10.04
   0  -1  -1    0.71    0.28
   0  -1   1    0.64    0.32
   0  -1  -1    0.67    0.25
  -1  -1  -1  809.00   21.34
  -1  -1  -1  793.68   21.70
   1  -1   1  826.64   20.71
  -1  -1  -1  816.31   21.39
  -1  -1  -1  842.16   21.56
   1  -1   1  859.65   21.09
   1  -1   1  829.31   21.32
   1   1   1  835.75   21.30
  -1   1  -1  730.69   20.84
   1   1   1  814.38   21.93
   1   1   1  871.80   21.51
  -1   1  -1  844.67   20.79
  -1   1  -1  803.21   21.25
   2  -1   1  137.20    5.43
   2  -1   1  138.74    5.64
  -2  -1  -1  142.99    5.67
  -2  -1  -1  128.38    5.56
   2   1   1  139.67    5.52
  -2   1  -1  139.54    5.22
  -2   1  -1  136.65    3.98
  -3  -1  -1   -1.18    0.66
   3  -1   1    0.18    1.00
  -3   1  -1   -0.20    0.83
   3   1   1   -1.26    0.76
  -4  -1  -1    4.14    1.76
   4  -1   1    3.87    1.76
  -4   1  -1    5.90    1.73
   4   1   1    6.40    2.03
  -5  -1  -1  276.32   12.11
   5   1   1  279.85   12.20
  -5   1  -1  292.99   11.84
  -6  -1  -1  684.67   24.08
   6  -1   1  685.96   24.52
  -6   1  -1  735.76   23.96
   6   1   1  676.68   24.11
  -7  -1  -1   24.47    4.78
   7  -1   1   27.65    5.02
  -7  -1  -1   32.44    5.40
  -7   1  -1   28.37    4.70
   7   1   1   30.79    5.31
   8  -1   1   39.09    6.57
  -8  -1  -1   47.94    7.35
  -8   1  -1   52.57    7.01
   8   1   1   45.13    6.84
   9  -1   1  292.81   17.04
  -9  -1  -1  329.96   17.29
   9   1   1  319.03   17.41
   9  -2  -1   64.98    9.39
  -9  -2   1   63.10    8.72
  -8  -2   1    2.01    2.75
   8  -2  -1    5.59    2.95
   8   2  -1    4.83    2.89
  -7  -2   1  136.71    9.49
   7  -2  -1  143.19   10.05
  -7   2   1  138.26    8.94
   7   2  -1  132.95    9.32
   6  -2  -1  134.32    8.90
  -6  -2   1  130.98    8.67
  -6   2   1  129.43    7.95
   6   2  -1  126.30    8.33
   5  -2  -1   82.59    7.50
  -5  -2   1  102.70    6.88
  -5   2   1  102.45    6.21
   5   2  -1   90.24    6.36
  -4  -2   1   36.92    4.29
   4  -2  -1   50.77    5.21
   4   2  -1   52.54    5.01
  -4   2   1   42.87    4.14
  -3  -2   1   16.64    2.60
   3  -2  -1   15.55    2.42
   3  -2  -1   21.29    2.99
  -3   2   1   19.59    2.40
  -3   2   1   20.77    1.91
   3   2  -1   18.55    2.51
   2  -2  -1  349.33   10.61
   2  -2  -1  340.02   10.91
  -2  -2   1  322.85   10.88
  -2  -2   1  339.62   11.15
  -2   2   1  343.22   10.09
   2   2  -1  340.07   11.41
   2   2  -1  334.38   11.97
  -2   2   1  319.04    9.92
   2   2  -1  340.32   10.53
  -1  -2   1   53.55    2.44
  -1  -2   1   55.83    3.48
   1  -2  -1   55.81    2.42
   1  -2  -1   54.20    2.74
   1  -2  -1   49.66    2.11
  -1  -2   1   49.74    2.99
   1   2  -1   57.46    3.63
   1   2  -1   53.39    2.71
   1   2  -1   48.06    2.06
   1   2  -1   56.89    3.34
  -1   2   1   48.93    2.72
   0  -2   1  591.79   16.14
   0  -2   1  568.81   16.75
   0  -2  -1  564.88   15.99
   0  -2  -1  564.30   16.21
   0   2  -1  556.89   16.55
   0   2   1  542.30   15.98
  -1  -2  -1  336.63    9.90
   1  -2   1  348.50   10.30
   1  -2   1  347.30    9.33
  -1  -2  -1  348.09   11.08
  -1  -2  -1  348.34   11.01
  -1  -2  -1  355.42    9.80
  -1  -2  -1  342.33   11.24
   1  -2   1  360.83    9.64
   1   2   1  335.60   11.15
  -1   2  -1  345.23   10.34
   2  -2   1 2804.43   68.22
  -2  -2  -1 2723.67   68.63
   2  -2   1 2721.17   67.73
  -2  -2  -1 2698.35   68.34
  -2  -2  -1 2597.78   68.23
  -2   2  -1 2503.73   67.09
   2   2   1 2722.26   69.39
   2   2   1 2698.78   69.47
  -2   2  -1 2705.08   67.11
   2   2   1 2809.95   68.00
  -3  -2  -1    6.05    1.68
   3  -2   1    8.16    1.87
   3  -2   1    5.55    1.53
   3   2   1    5.25    1.49
  -3   2  -1    6.42    1.43
  -3   2  -1    6.68    1.02
   4  -2   1  123.19    6.91
  -4  -2  -1  121.10    6.84
  -4   2  -1  122.16    4.35
  -4   2  -1  123.72    6.19
   4   2   1  134.45    6.87
   5  -2   1   99.17    6.85
  -5  -2  -1  105.71    6.88
   5   2   1  100.30    6.63
  -5   2  -1  102.41    6.18
  -5   2  -1  101.99    3.75
   6  -2   1   15.94    3.86
  -6  -2  -1   19.32    3.16
  -6  -2  -1   23.07    4.33
  -6   2  -1   19.83    3.70
   6   2   1   24.89    4.36
  -7  -2  -1   16.01    4.11
  -7  -2  -1    8.45    2.61
   7  -2   1    8.95    3.37
   7   2   1   10.23    3.31
  -7   2  -1   14.70    3.58
   8  -2   1  289.22   15.69
  -8  -2  -1  273.52   14.97
   8   2   1  297.49   15.45
   9  -2   1   79.81    9.84
  -9  -2  -1  109.58   11.27
   9  -3  -1   30.60    6.65
  -9  -3   1   26.22    6.21
   8  -3  -1  124.05   11.64
  -8  -3   1  125.62   11.68
   7  -3  -1   11.66    3.54
  -7  -3   1    8.25    3.12
  -7  -3   1   12.22    3.22
   7   3  -1   16.08    4.00
  -6  -3   1   74.30    7.67
   6  -3  -1   67.90    7.46
  -6   3   1   81.96    4.19
   6   3  -1   99.69   10.06
   6   3  -1   86.00    7.76
  -6   3   1   84.68    6.11
  -5  -3   1  136.87    8.36
   5  -3  -1  148.71    8.60
  -5   3   1  134.79    7.09
   5   3  -1  146.20    9.47
   5   3  -1  145.86    8.02
  -5   3   1  134.12    5.77
  -4  -3   1   19.07    3.33
   4  -3  -1   17.48    3.08
   4   3  -1   28.44    4.57
  -4   3   1   19.28    2.30
   4   3  -1   18.33    3.06
  -4   3   1   23.26    2.88
   3  -3  -1   89.17    5.02
  -3  -3   1   76.70    5.06
   3  -3  -1   91.67    5.24
  -3  -3   1   82.58    5.28
   3   3  -1   90.81    4.79
  -3   3   1   98.11    4.57
   3   3  -1   91.15    6.30
  -2  -3   1 2677.07   69.80
  -2  -3   1 2697.41   67.87
  -2  -3   1 2750.46   68.29
  -2  -3   1 2781.91   68.92
   2  -3  -1 2718.70   67.65
   2  -3  -1 2532.42   67.00
   2   3  -1 2546.99   70.38
  -2   3   1 2635.14   65.74
  -2   3   1 2672.19   67.87
   1  -3  -1 4036.18   98.14
   1  -3  -1 4064.68  100.46
  -1  -3   1 4003.78  101.35
  -1  -3   1 3961.08  102.28
   1  -3  -1 3906.66   98.35
  -1  -3   1 4074.46   98.96
  -1   3   1 4109.98  100.82
   1   3  -1 3974.87  102.30
   0  -3   1 2031.63   53.98
   0  -3  -1 2019.66   53.42
   0  -3  -1 1997.72   52.82
   0  -3   1 2048.36   53.01
   0   3   1 2077.48   53.13
   1  -3   1 1143.08   30.66
  -1  -3  -1 1099.68   31.61
  -1  -3  -1 1109.15   31.84
  -1  -3  -1 1160.25   29.18
  -1  -3  -1 1144.48   31.44
  -1  -3  -1 1112.13   28.91
   1  -3   1 1154.90   28.48
   1  -3   1 1122.74   28.24
   1   3   1 1163.52   31.93
   2  -3   1  180.18    6.64
   2  -3   1  179.84    6.56
  -2  -3  -1  177.92    7.77
  -2  -3  -1  167.47    6.64
   2  -3   1  164.42    6.12
  -2  -3  -1  183.54    7.86
  -2  -3  -1  172.74    6.82
  -2   3  -1  176.17    5.47
   2   3   1  171.96    8.17
  -2   3  -1  180.08    6.82
  -3  -3  -1   27.28    3.43
   3  -3   1   22.12    3.00
  -3  -3  -1   31.32    3.86
   3  -3   1   31.27    3.31
  -3  -3  -1   26.82    3.29
   3   3   1   24.56    3.65
   3   3   1   24.94    2.86
  -3   3  -1   29.39    2.75
  -4  -3  -1  429.16   15.44
  -4  -3  -1  444.86   15.96
   4  -3   1  435.49   15.83
   4   3   1  455.36   17.24
  -4   3  -1  448.27   13.18
   4   3   1  451.27   15.44
  -4   3  -1  445.09   14.38
  -5  -3  -1  106.63    7.08
  -5  -3  -1  106.89    6.53
   5  -3   1  121.23    7.47
   5   3   1  106.10    7.82
   5   3   1  101.86    6.63
  -5   3  -1  109.14    4.49
  -5   3  -1  103.57    6.08
  -6  -3  -1  328.91   13.82
   6  -3   1  367.01   15.84
  -6  -3  -1  394.09   16.10
  -6   3  -1  341.67   13.92
   6   3   1  360.25   15.15
  -7  -3  -1  127.61    7.95
  -7  -3  -1  147.72    9.87
   7  -3   1  127.62   11.25
   7   3   1  131.11    9.23
  -8  -3  -1   25.70    5.60
   8  -3   1   18.42    4.91
  -9  -3  -1  472.68   22.44
   9  -3   1  516.64   23.60
   9  -4  -1   31.48    6.85
  -9  -4   1   26.52    6.06
   8  -4  -1    9.08    3.96
  -8  -4   1   15.36    4.60
   7  -4  -1   -1.18    2.06
  -7  -4   1    0.46    1.85
  -6  -4   1   82.74    8.43
  -6  -4   1   55.40    6.56
   6  -4  -1   62.40    7.30
   6   4  -1   59.88    7.83
  -6   4   1   62.33    4.11
   6   4  -1   63.40    6.67
   5  -4  -1  248.50   11.71
  -5  -4   1  241.50   11.75
  -5  -4   1  217.00   11.08
   5   4  -1  256.70   11.00
   5   4  -1  246.47   13.51
  -5   4   1  228.88    9.50
  -5   4   1  233.55    9.11
  -4  -4   1    2.30    1.48
   4  -4  -1    1.44    1.39
   4  -4  -1    2.23    1.21
  -4   4   1    0.83    0.74
   4   4  -1    0.03    1.65
  -4   4   1    2.35    1.21
   4   4  -1    4.72    1.56
   3  -4  -1    0.43    0.86
   3  -4  -1    0.31    0.87
  -3  -4   1   -0.21    0.92
  -3  -4   1    0.72    0.96
   3   4  -1    5.35    2.27
  -3   4   1   -0.99    0.46
  -3   4   1    1.49    1.02
   3   4  -1   -0.09    0.45
  -2  -4   1  136.74    7.51
   2  -4  -1  146.76    6.50
  -2  -4   1  146.60    6.15
  -2  -4   1  147.39    8.02
   2  -4  -1  160.24    6.11
  -2  -4   1  149.13    7.38
   2  -4  -1  140.49    5.51
  -2  -4   1  144.38    6.46
   2   4  -1  142.46    4.76
  -2   4   1  151.16    6.95
   2   4  -1  148.68    8.45
  -1  -4   1 1103.03   28.42
  -1  -4   1 1107.88   32.22
  -1  -4   1 1125.92   33.17
   1  -4  -1 1109.03   31.18
  -1  -4   1 1111.85   32.21
   1   4  -1 1098.83   33.03
  -1   4   1 1147.12   31.73
   0  -4   1  435.50   16.08
   0  -4  -1  447.87   15.06
   0  -4  -1  424.14   15.54
   0  -4   1  463.61   15.26
  -1  -4  -1  151.63    7.33
  -1  -4  -1  136.42    7.40
  -1  -4  -1  141.43    5.03
  -1  -4  -1  144.25    4.85
   1  -4   1  149.87    6.86
  -1  -4  -1  140.35    7.55
   1   4   1  146.86    7.61
  -2  -4  -1 3173.14   81.63
  -2  -4  -1 3099.99   79.01
  -2  -4  -1 3123.84   81.66
   2  -4   1 3153.83   78.43
   2  -4   1 3068.21   77.81
  -2  -4  -1 3136.26   81.48
  -2  -4  -1 3042.15   78.69
   2  -4   1 3148.14   79.57
   2   4   1 3103.08   77.04
   2   4   1 3210.81   82.61
  -3  -4  -1  218.65    9.83
  -3  -4  -1  208.55    8.90
  -3  -4  -1  228.45   10.12
   3  -4   1  207.49    8.33
  -3  -4  -1  194.45    8.79
   3  -4   1  222.58    8.80
  -3   4  -1  232.38    8.69
  -3   4  -1  212.01    6.93
   3   4   1  227.97   11.11
  -4  -4  -1    3.03    1.59
  -4  -4  -1    5.60    2.09
   4  -4   1    1.86    1.44
   4  -4   1    3.05    1.57
   4   4   1    5.79    2.29
  -4   4  -1    0.89    0.88
   4   4   1    4.65    1.63
  -4   4  -1    3.95    1.35
  -5  -4  -1  130.70    8.03
   5  -4   1  112.24    7.47
  -5  -4  -1  127.56    7.79
  -5   4  -1  120.25    6.30
   5   4   1  130.60    7.44
   5   4   1  110.84   10.20
   6  -4   1    5.29    2.52
  -6  -4  -1    9.19    3.07
  -6  -4  -1    8.58    2.77
   6   4   1    7.38    2.47
   6   4   1    4.63    2.68
  -7  -4  -1    8.62    3.27
   7  -4   1    1.92    2.66
  -8  -4  -1  125.47   11.47
   8  -4   1  129.95   12.08
   9  -4   1   75.44   10.14
  -9  -4  -1   78.68   10.04
   8  -5  -1  196.46   13.25
  -8  -5   1  221.94   13.86
   7  -5  -1  156.59   10.74
  -7  -5   1  134.00   11.91
   6  -5  -1   93.68    8.96
  -6  -5   1   90.88    8.85
   6   5  -1   75.18    9.65
  -6   5   1   75.65    5.61
  -5  -5   1   65.69    6.82
   5  -5  -1   53.39    6.14
   5   5  -1   61.95    7.97
  -5   5   1   66.07    5.67
  -4  -5   1  661.12   23.05
   4  -5  -1  605.54   20.72
   4  -5  -1  642.57   21.13
  -4  -5   1  642.14   21.61
  -4   5   1  642.04   20.50
   4   5  -1  645.71   25.01
   4   5  -1  626.21   19.38
  -3  -5   1  147.74    8.03
  -3  -5   1  131.02    6.98
  -3  -5   1  153.04    7.44
   3  -5  -1  148.19    6.93
   3  -5  -1  130.27    6.32
  -3  -5   1  128.79    8.15
  -3   5   1  141.47    7.40
   3   5  -1  138.38    9.26
  -2  -5   1 1137.53   31.44
   2  -5  -1 1197.85   30.63
  -2  -5   1 1141.05   33.91
   2  -5  -1 1117.95   29.92
  -2  -5   1 1110.80   30.88
  -2  -5   1 1115.97   35.08
   2  -5  -1 1132.18   32.47
  -2  -5   1 1158.55   34.60
  -2   5   1 1104.65   33.10
   2   5  -1 1177.05   35.96
  -1  -5   1 1525.60   38.88
  -1  -5   1 1577.48   44.05
   1  -5  -1 1489.98   44.31
   1  -5  -1 1541.96   42.78
  -1  -5   1 1594.20   45.32
  -1  -5   1 1529.97   44.01
  -1   5   1 1594.87   43.46
   1   5  -1 1484.69   44.55
   0  -5  -1  401.48   14.83
   0  -5   1  404.26   16.15
   0  -5   1  421.73   15.12
   0  -5  -1  371.72   15.39
  -1  -5  -1  167.13    8.63
   1  -5   1  175.00    9.60
   1  -5   1  177.52    8.29
  -1  -5  -1  169.44    5.53
  -1  -5  -1  164.47    5.72
  -1  -5  -1  147.60    8.71
  -1  -5  -1  156.34    8.88
   1   5   1  169.72    8.98
   2  -5   1  136.88    5.06
   2  -5   1  131.59    5.41
   2  -5   1  124.45    6.65
  -2  -5  -1  125.44    7.67
  -2  -5  -1  142.07    8.25
  -2  -5  -1  127.34    5.86
  -2  -5  -1  139.56    8.02
  -2  -5  -1  124.81    5.64
   2   5   1  118.51    7.93
  -3  -5  -1  125.60    7.79
  -3  -5  -1  136.17    7.82
  -3  -5  -1  116.34    6.31
   3  -5   1  123.71    5.83
  -3  -5  -1  112.57    6.29
   3  -5   1  122.74    6.12
   3  -5   1  114.32    6.00
   3   5   1  121.68    8.41
   4  -5   1   38.39    4.55
  -4  -5  -1   36.59    5.06
   4  -5   1   44.25    4.80
  -4  -5  -1   43.14    4.97
   4   5   1   37.68    5.85
   4   5   1   38.11    4.07
  -5  -5  -1   18.78    3.84
   5  -5   1    9.37    2.78
   5   5   1   11.77    3.61
   6  -5   1   60.06    6.91
  -6  -5  -1   51.06    6.47
   6   5   1   50.66    7.51
   7  -5   1   13.63    4.10
  -7  -5  -1    7.87    3.44
  -8  -5  -1    0.00    2.63
   8  -5   1    4.23    2.85
   8  -6  -1   14.22    4.75
  -8  -6   1   11.78    4.34
   7  -6  -1    6.44    3.36
  -7  -6   1   10.45    3.90
  -6  -6   1   46.66    6.60
   6  -6  -1   48.66    6.51
  -5  -6   1  109.05    9.22
   5  -6  -1  101.86    7.33
   5   6  -1   71.51    9.15
  -4  -6   1  203.73    9.89
   4  -6  -1  168.93    8.87
   4   6  -1  191.56   12.40
  -4   6   1  178.68    9.30
  -3  -6   1    9.04    2.36
  -3  -6   1    6.52    2.03
  -3  -6   1   10.92    2.99
   3  -6  -1    6.24    1.81
  -3  -6   1    6.32    2.59
   3  -6  -1    7.28    1.98
   3   6  -1    8.44    3.34
  -3   6   1    9.65    2.57
  -2  -6   1 1235.04   38.61
   2  -6  -1 1256.37   33.10
  -2  -6   1 1305.68   39.99
  -2  -6   1 1230.82   34.21
   2  -6  -1 1315.47   36.98
  -2  -6   1 1224.03   34.60
  -2  -6   1 1250.72   38.20
   2  -6  -1 1285.18   33.66
   2   6  -1 1310.34   40.51
  -1  -6   1  512.05   19.01
  -1  -6   1  515.68   20.19
  -1  -6   1  479.48   13.68
   1  -6  -1  493.26   19.56
   1  -6  -1  498.03   17.91
  -1  -6   1  489.31   18.94
   1   6  -1  493.57   19.54
   0  -6   1   15.95    3.91
   0  -6   1   18.57    3.77
   0  -6  -1   13.60    3.48
   0  -6  -1   12.93    3.15
  -1  -6  -1  495.47   13.38
   1  -6   1  440.21   19.03
  -1  -6  -1  480.06   19.00
  -1  -6  -1  482.68   19.05
  -1  -6  -1  469.02   18.10
   1  -6   1  466.76   17.40
  -1  -6  -1  473.94   13.57
   1   6   1  499.04   18.97
  -2  -6  -1  529.34   20.15
  -2  -6  -1  572.69   20.78
  -2  -6  -1  527.54   16.33
   2  -6   1  543.07   15.27
  -2  -6  -1  518.10   20.46
  -2  -6  -1  574.41   16.76
   2  -6   1  542.70   18.75
   2  -6   1  529.73   15.73
   2   6   1  543.47   21.20
   3  -6   1  129.38    6.31
   3  -6   1  147.79    6.91
   3  -6   1  135.24    7.35
  -3  -6  -1  146.54    8.89
  -3  -6  -1  163.50    9.69
  -3  -6  -1  144.97    7.33
  -3  -6  -1  156.33    7.45
   3   6   1  133.29    9.63
   4  -6   1    8.00    2.38
  -4  -6  -1   10.63    2.98
   4   6   1    6.48    3.07
  -5  -6  -1   46.05    5.70
   5  -6   1   42.94    5.35
   5   6   1   37.17    6.72
   6  -6   1   55.17    6.79
  -6  -6  -1   48.69    6.44
  -7  -6  -1    5.08    3.13
   7  -6   1    1.90    2.72
   8  -6   1   28.75    6.11
  -8  -6  -1   35.23    6.63
   7  -7  -1  196.32   12.43
  -7  -7   1  171.67   11.87
  -6  -7   1    6.59    2.93
   6  -7  -1    4.41    2.77
   5  -7  -1   17.20    3.74
  -5  -7   1   18.95    4.18
   4  -7  -1   87.19    6.08
  -4  -7   1   90.44    6.57
   4   7  -1   91.03   10.67
   3  -7  -1   45.50    4.40
  -3  -7   1   33.07    5.79
  -3  -7   1   54.15    6.63
  -3  -7   1   48.12    5.02
   3   7  -1   63.80    8.58
   2  -7  -1  405.98   12.31
  -2  -7   1  424.63   13.89
  -2  -7   1  395.85   17.24
  -2  -7   1  422.55   18.84
  -2  -7   1  413.23   13.56
   2  -7  -1  434.11   19.21
   2  -7  -1  402.87   12.71
   2  -7  -1  390.31   16.07
   2   7  -1  398.49   18.57
   1  -7  -1    1.12    1.97
  -1  -7   1    6.30    2.78
  -1  -7   1    3.61    2.51
  -1  -7   1    2.21    0.93
   0  -7   1    0.61    1.80
   0  -7  -1   -1.10    1.77
  -1  -7  -1  189.64    6.58
   1  -7   1  202.29   12.26
   1  -7   1  182.46   11.46
  -1  -7  -1  188.02   11.46
  -1  -7  -1  185.44    6.40
  -1  -7  -1  183.36   11.28
   2  -7   1   19.82    2.28
  -2  -7  -1   17.32    2.58
   2  -7   1   18.75    4.71
  -2  -7  -1   16.18    2.46
  -2  -7  -1   20.98    4.44
   2  -7   1   21.97    2.20
   2  -7   1   20.83    3.97
  -2  -7  -1   17.14    4.17
   2   7   1   21.56    4.64
  -3  -7  -1   83.24    8.59
   3  -7   1   76.47    6.96
  -3  -7  -1   80.69    5.42
   3  -7   1   81.62    5.00
  -3  -7  -1   84.07    8.91
   3   7   1   84.28    9.51
   4  -7   1   44.49    4.96
  -4  -7  -1   45.70    5.22
   4   7   1   50.99    7.65
  -5  -7  -1   93.63    8.40
   5  -7   1   98.15    7.15
   5   7   1   76.30   10.08
   6  -7   1  131.60    9.39
  -6  -7  -1  147.19    9.79
   7  -7   1   35.63    6.42
  -7  -7  -1   22.89    5.12
  -6  -8   1    3.65    2.66
   6  -8  -1    0.44    2.45
   5  -8  -1    1.88    1.76
  -5  -8   1    0.77    1.98
  -4  -8   1   59.78    6.36
   4  -8  -1   68.89    6.37
  -3  -8   1   24.26    3.72
   3  -8  -1   20.73    3.12
  -3  -8   1   28.52    5.50
   3   8  -1   18.96    5.28
   2  -8  -1  405.06   12.76
   2  -8  -1  437.32   20.96
  -2  -8   1  407.55   19.95
  -2  -8   1  405.95   13.88
  -2  -8   1  424.47   18.62
   2   8  -1  376.78   19.21
   1  -8  -1    4.10    3.20
  -1  -8   1    4.17    1.61
  -1  -8   1    5.94    3.40
  -1  -8   1    6.76    3.12
  -1  -8   1    1.33    1.18
   0  -8   1    1.20    2.31
   0  -8  -1    4.79    2.86
   0  -8   1   -2.18    1.95
   0  -8  -1    4.88    3.18
  -1  -8  -1  598.85   25.00
  -1  -8  -1  601.97   16.95
  -1  -8  -1  615.77   24.83
  -1  -8  -1  614.01   17.10
   1  -8   1  604.95   25.94
  -2  -8  -1  221.79   13.45
  -2  -8  -1  229.14   13.33
   2  -8   1  220.40    7.86
  -2  -8  -1  221.38    8.77
   2   8   1  215.91   13.39
  -3  -8  -1   73.32    5.25
   3  -8   1   72.30    4.79
  -3  -8  -1   76.89    8.77
   3   8   1   86.99   10.35
  -4  -8  -1   97.62   10.11
  -4  -8  -1   91.78    6.59
   4  -8   1   89.44    6.20
   4   8   1   93.15   10.82
  -5  -8  -1    7.25    2.78
   5  -8   1    5.90    2.38
  -6  -8  -1    3.23    2.81
   6  -8   1    3.95    2.88
   5  -9  -1    3.35    2.47
  -5  -9   1   -1.25    1.71
   4  -9  -1    2.70    1.96
  -4  -9   1    1.13    1.94
  -3  -9   1   42.44    6.97
   3  -9  -1   41.24    4.22
  -3  -9   1   30.83    4.18
   2  -9  -1  167.19    6.65
  -2  -9   1  164.69    7.55
  -2  -9   1  173.51   11.76
  -1  -9   1   12.34    2.11
  -1  -9   1   25.03    5.76
   0  -9  -1  123.72   12.80
   0  -9   1  127.66   12.59
  -1  -9  -1   21.13    2.33
  -1  -9  -1   21.75    5.51
  -2  -9  -1  117.54   11.95
   2  -9   1  102.82    4.72
  -2  -9  -1  105.81    5.61
   3  -9   1   36.08    3.80
  -3  -9  -1   40.68    4.62
  -3  -9  -1   31.74    5.99
  -4  -9  -1   -0.28    1.60
   4  -9   1    2.59    1.94
  -4  -9  -1    1.19    2.53
   5  -9   1  163.89    9.63
  -5  -9  -1  154.05    9.75
  -4 -10   1   13.71    3.46
   4 -10  -1    8.73    2.80
  -3 -10   1    8.19    2.54
  -3 -10   1    8.84    4.07
   3 -10  -1    8.38    2.12
   2 -10  -1    8.69    1.67
  -2 -10   1    7.43    2.17
  -2 -10   1    5.77    3.61
  -1 -10   1    0.51    2.86
  -1 -10   1   -2.37    0.91
   0 -10   1  171.32   12.97
   0 -10  -1  149.88   14.67
  -1 -10  -1   18.89    5.49
  -1 -10  -1   20.89    2.28
   2 -10   1   39.14    2.71
  -2 -10  -1   52.96    8.18
  -2 -10  -1   44.63    4.19
  -3 -10  -1    5.97    4.05
  -3 -10  -1    3.86    1.93
   3 -10   1    3.72    1.52
   4 -10   1  110.37    6.94
  -4 -10  -1   99.87    7.32
  -4 -10  -1  102.51   11.46
  -1 -11   1  315.96   18.67
   1 -11  -1  314.98   19.98
   0 -11  -1   33.67    7.52
   0 -11   1   31.11    7.27
   1 -11   1  385.77   21.96
  -1 -11  -1  389.45   21.59
   9   0  -2    2.38    3.09
  -9   0   2    0.20    2.50
   8   0  -2  235.03   13.80
  -8   0   2  245.02   13.55
   7   0  -2    1.17    2.25
  -7   0   2    1.93    2.16
  -6   0   2  559.22   20.70
   6   0  -2  558.30   21.18
  -5   0   2   -0.89    1.03
   5   0  -2    2.36    1.79
   4   0  -2  123.51    6.89
  -4   0   2  108.97    6.40
   3   0  -2   -0.55    0.67
  -3   0   2   -0.15    0.67
   2   0  -2  705.32   20.74
  -2   0   2  754.89   20.91
  -1   0   2   -0.88    0.26
   1   0  -2   -0.56    0.32
  -1   0   2   -0.88    0.26
   0   0   2   -0.44    0.07
   0   0   2   -0.43    0.09
   0   0  -2   -0.40    0.13
   0   0  -2   -0.36    0.12
   0   0  -2   -0.49    0.05
   0   0   2   -0.46    0.12
  -1   0  -2  -11.93    0.39
   1   0   2  -12.28    0.26
   1   0   2  -12.29    0.15
  -1   0  -2  -11.67    0.34
   1   0   2  -12.20    0.34
   2   0   2 1840.07   47.93
  -2   0  -2 1851.53   45.95
  -2   0  -2 1908.43   47.75
   3   0   2   -1.46    0.50
  -3   0  -2    0.77    0.97
  -4   0  -2   66.24    4.60
   4   0   2   78.62    5.17
   5   0   2   -1.11    1.06
  -5   0  -2   -1.35    0.95
  -6   0  -2   79.00    7.31
  -6   0  -2   65.14    3.44
   6   0   2   99.47    8.71
  -7   0  -2   -1.69    1.59
   7   0   2    0.05    1.90
  -8   0  -2  155.73   10.65
   8   0   2  194.18   12.14
  -9   0  -2    1.99    2.67
   9   0   2    4.21    3.37
  -9  -1   2  150.45   13.51
   9  -1  -2  131.83   12.68
   9   1  -2  163.79   14.00
  -8  -1   2  126.96   11.32
   8  -1  -2  135.50   12.47
  -8   1   2  137.68    9.85
   8   1  -2  144.97   12.46
  -7  -1   2  339.01   15.81
   7  -1  -2  347.18   16.35
   7   1  -2  310.73   15.46
  -7   1   2  324.43   14.97
   6  -1  -2    3.02    2.28
  -6  -1   2    1.58    1.99
   6   1  -2    0.46    1.69
  -6   1   2    1.87    1.87
   5  -1  -2   20.45    3.93
  -5  -1   2   13.83    2.97
   5   1  -2   16.56    3.33
  -5   1   2   17.15    3.24
  -4  -1   2    4.57    1.83
   4  -1  -2    6.53    2.17
   4   1  -2    7.09    2.16
  -4   1   2    6.01    1.81
   3  -1  -2  460.04   15.11
  -3  -1   2  452.43   15.06
   3   1  -2  426.58   14.71
  -3   1   2  455.08   14.57
  -2  -1   2  368.91   12.10
   2  -1  -2  371.58   12.06
  -2  -1   2  384.31   12.31
   2  -1  -2  371.10   11.99
   2   1  -2  389.84   12.01
  -2   1   2  386.37   11.72
   1  -1  -2  767.32   20.18
   1  -1  -2  774.99   20.11
  -1  -1   2  735.12   20.63
  -1  -1   2  775.65   20.21
   1   1  -2  740.47   20.83
  -1   1   2  758.47   19.87
   1   1  -2  758.33   20.03
  -1   1   2  745.48   20.08
   0  -1   2  239.28    6.37
   0  -1  -2  204.26    6.41
   0   1   2  246.30    6.06
   0   1  -2  191.75    5.99
   0   1  -2  254.92    7.45
  -1  -1  -2  748.69   20.11
  -1  -1  -2  778.57   20.17
  -1  -1  -2  746.76   20.02
   1  -1   2  759.86   20.01
  -1  -1  -2  756.73   20.57
   1  -1   2  785.44   19.86
  -1   1  -2  743.67   19.75
   1   1   2  765.58   20.22
   1   1   2  747.81   20.14
   1   1   2  742.08   20.77
   1   1   2  781.37   20.12
  -1   1  -2  798.18   20.08
  -2  -1  -2   28.56    2.63
   2  -1   2   34.31    2.44
  -2  -1  -2   31.24    2.01
  -2  -1  -2   36.03    3.13
   2  -1   2   31.58    2.24
   2   1   2   29.18    2.70
  -2   1  -2   29.69    2.11
   2   1   2   33.97    2.49
  -3  -1  -2 4307.22  109.02
  -3  -1  -2 4373.93  107.40
   3  -1   2 4343.15  109.22
   3   1   2 4259.31  109.02
  -3   1  -2 4385.94  108.54
  -4  -1  -2  384.84   11.98
   4  -1   2  397.51   14.23
  -4  -1  -2  373.18   13.77
  -4   1  -2  368.37   13.29
   4   1   2  394.49   14.02
  -5  -1  -2    9.18    2.43
   5  -1   2    8.93    2.48
  -5  -1  -2    9.49    1.78
   5   1   2    9.43    2.50
  -5   1  -2    8.92    2.26
  -6  -1  -2   10.26    2.85
  -6  -1  -2    9.05    1.99
   6  -1   2   10.66    3.17
  -6   1  -2   10.95    3.03
   6   1   2   14.73    3.58
   7  -1   2 1376.94   42.53
  -7  -1  -2 1364.17   41.69
  -7   1  -2 1331.33   40.98
   7   1   2 1317.04   41.92
  -8  -1  -2    2.46    2.70
   8  -1   2    6.04    3.27
  -8   1  -2    0.00    2.17
   8   1   2    1.37    2.41
   9  -1   2   14.14    4.67
  -9  -1  -2   22.94    5.66
   9   1   2   18.80    5.14
   9  -2  -2   39.53    7.24
  -9  -2   2   53.79    8.25
  -8  -2   2  147.00   10.74
   8  -2  -2  139.57   12.51
   8   2  -2  148.44   10.63
  -7  -2   2  105.08   10.22
   7  -2  -2  100.86    9.68
  -7   2   2   99.53    9.11
   7   2  -2   90.28    8.78
  -6  -2   2   94.85    8.77
   6  -2  -2   90.24    8.36
   6   2  -2   90.31    8.16
  -6   2   2   84.79    7.40
  -5  -2   2   95.32    6.71
   5  -2  -2   82.67    7.41
  -5   2   2   88.93    5.97
   5   2  -2   86.70    6.27
   4  -2  -2   22.45    3.61
  -4  -2   2   23.47    3.60
   4   2  -2   28.73    3.78
  -4   2   2   22.55    3.18
  -3  -2   2  432.18   14.91
   3  -2  -2  438.52   14.76
   3  -2  -2  439.58   15.22
   3   2  -2  430.60   14.29
  -3   2   2  439.75   13.82
   3   2  -2  443.04   15.68
  -2  -2   2 2430.01   63.40
   2  -2  -2 2493.87   63.33
  -2  -2   2 2493.57   63.81
   2  -2  -2 2493.62   63.07
  -2   2   2 2409.21   62.24
  -2   2   2 2514.37   62.33
   2   2  -2 2574.16   65.13
   2   2  -2 2435.78   63.55
   2   2  -2 2507.23   62.89
  -1  -2   2   57.65    2.75
  -1  -2   2   58.60    3.15
  -1  -2   2   58.52    3.83
   1  -2  -2   58.85    2.74
   1  -2  -2   56.07    2.54
  -1   2   2   56.05    2.04
   1   2  -2   53.42    3.26
   1   2  -2   53.16    3.70
  -1   2   2   58.74    3.08
  -1   2   2   56.83    2.17
   0  -2  -2   44.17    2.65
   0  -2  -2   41.86    1.38
   0  -2  -2   40.46    2.58
   0  -2   2   41.65    3.11
   0   2   2   43.01    2.71
   0   2  -2   28.89    2.85
   1  -2   2   12.47    1.24
   1  -2   2    9.87    1.34
  -1  -2  -2   11.87    1.34
  -1  -2  -2   15.93    2.27
  -1  -2  -2   12.58    1.74
  -1  -2  -2   13.46    1.45
   1  -2   2   12.27    1.16
  -1  -2  -2    9.63    1.57
   1   2   2   10.88    1.98
  -1   2  -2   12.92    0.90
   1   2   2   10.22    1.66
  -1   2  -2   12.59    1.02
   1   2   2   10.88    1.67
   2  -2   2 1034.73   27.44
   2  -2   2 1104.06   28.84
  -2  -2  -2 1083.63   28.97
  -2  -2  -2 1108.23   29.00
  -2  -2  -2 1104.90   29.25
  -2  -2  -2 1104.89   29.65
   2  -2   2 1057.23   28.36
   2   2   2 1059.33   28.71
  -2   2  -2 1044.15   27.93
   2   2   2 1092.11   29.71
   2   2   2 1030.29   30.10
  -3  -2  -2  221.36    8.47
  -3  -2  -2  217.16    8.85
   3  -2   2  221.75    8.87
   3  -2   2  229.32    9.15
  -3   2  -2  244.33    8.34
  -3   2  -2  226.57    6.79
   3   2   2  219.50    8.73
   4  -2   2  204.80    9.34
  -4  -2  -2  230.43    9.68
  -4  -2  -2  203.30    8.37
   4   2   2  220.72    9.35
  -4   2  -2  204.74    6.10
  -4   2  -2  199.83    8.50
   5  -2   2  212.62   10.39
  -5  -2  -2  215.16   10.29
  -5  -2  -2  209.31    8.75
  -5   2  -2  208.95    9.45
   5   2   2  199.60    9.91
   6  -2   2  482.53   19.08
  -6  -2  -2  459.61   18.56
  -6  -2  -2  481.08   16.29
  -6   2  -2  499.16   17.98
   6   2   2  496.10   18.83
  -7  -2  -2  289.22   14.20
   7  -2   2  250.53   13.77
  -7   2  -2  288.19   13.41
   7   2   2  295.56   14.38
  -8  -2  -2  608.11   24.24
   8  -2   2  606.83   24.80
   8   2   2  589.19   24.12
  -9  -2  -2   16.09    4.91
   9  -2   2   17.64    5.25
  -9  -3   2    4.59    3.71
   9  -3  -2    2.74    3.40
  -8  -3   2    3.19    2.89
   8  -3  -2    3.08    2.84
  -7  -3   2  562.40   22.11
   7  -3  -2  520.00   21.73
   7   3  -2  498.46   20.56
   6  -3  -2  211.57   12.03
  -6  -3   2  262.00   12.93
  -6   3   2  248.59   11.24
   6   3  -2  243.24   13.74
  -6   3   2  238.78    8.73
   6   3  -2  231.00   11.58
  -5  -3   2  642.25   22.34
   5  -3  -2  614.43   22.07
  -5   3   2  641.07   20.40
  -5   3   2  622.65   18.53
   5   3  -2  646.05   23.86
   5   3  -2  638.69   21.36
   4  -3  -2  199.57    9.36
  -4  -3   2  181.55    9.21
  -4   3   2  197.72    8.01
  -4   3   2  190.13    7.35
   4   3  -2  187.92    8.55
   4   3  -2  185.05   10.25
   3  -3  -2  467.25   15.66
  -3  -3   2  489.56   16.43
  -3  -3   2  485.93   16.95
   3  -3  -2  493.09   16.09
   3   3  -2  489.54   18.02
   3   3  -2  474.73   15.16
  -3   3   2  504.74   14.92
   2  -3  -2  684.59   20.25
  -2  -3   2  706.08   22.62
   2  -3  -2  754.76   20.88
  -2  -3   2  756.08   21.52
  -2  -3   2  785.24   21.73
  -2  -3   2  736.78   20.93
   2   3  -2  698.27   23.22
  -2   3   2  728.70   19.01
  -2   3   2  734.76   20.95
  -1  -3   2   49.63    3.43
  -1  -3   2   48.28    2.43
   1  -3  -2   45.08    2.22
   1  -3  -2   47.63    2.08
   1  -3  -2   49.81    3.19
   1   3  -2   55.46    5.11
  -1   3   2   51.23    3.37
   0  -3  -2  133.74    6.16
   0  -3   2  136.03    6.79
   0  -3   2  138.02    6.15
   0  -3  -2  136.95    6.00
   0   3   2  127.64    5.98
  -1  -3  -2 1416.41   39.36
  -1  -3  -2 1382.16   38.45
   1  -3   2 1424.65   37.87
   1  -3   2 1424.99   35.74
  -1  -3  -2 1432.57   36.37
  -1  -3  -2 1469.49   36.37
   1  -3   2 1469.53   35.87
  -1  -3  -2 1410.90   38.56
   1   3   2 1408.32   38.72
   1   3   2 1461.36   38.83
   2  -3   2 3429.53   84.58
  -2  -3  -2 3319.00   85.36
   2  -3   2 3449.44   85.13
  -2  -3  -2 3514.22   85.45
  -2  -3  -2 3397.67   87.09
  -2  -3  -2 3276.26   86.59
   2  -3   2 3422.18   85.05
  -2   3  -2 3407.21   83.79
   2   3   2 3363.41   87.34
   3  -3   2 4891.56  126.96
  -3  -3  -2 5069.10  128.22
   3  -3   2 5080.96  127.58
  -3  -3  -2 5119.38  129.45
  -3  -3  -2 5156.43  127.83
   3   3   2 5063.55  127.21
   3   3   2 5245.91  129.70
   4  -3   2   21.10    3.29
  -4  -3  -2   20.83    3.19
  -4  -3  -2   21.59    3.30
   4   3   2   25.24    4.00
  -4   3  -2   28.04    3.23
   4   3   2   22.49    3.25
   5  -3   2   46.08    5.37
  -5  -3  -2   36.09    4.69
  -5  -3  -2   49.40    5.06
   5   3   2   51.41    5.38
  -5   3  -2   40.90    4.29
   6  -3   2    2.71    2.08
  -6  -3  -2    7.35    2.76
  -6  -3  -2    8.39    2.34
   6   3   2   11.68    3.11
  -6   3  -2   11.87    2.78
  -7  -3  -2  125.09    9.03
   7  -3   2  133.11    9.43
  -7  -3  -2  100.24   10.91
   7   3   2  121.61   10.35
  -8  -3  -2   -1.25    2.36
   8  -3   2    5.42    3.32
   9  -3   2    5.47    3.43
  -9  -3  -2    8.90    4.11
  -9  -4   2  155.95   14.15
   9  -4  -2  200.36   14.30
   8  -4  -2   12.79    4.51
  -8  -4   2   11.47    4.33
   7  -4  -2   86.54    9.19
  -7  -4   2   90.14    9.62
   6  -4  -2    0.25    1.79
  -6  -4   2    1.08    1.95
   6   4  -2    3.45    2.79
   6   4  -2    3.15    2.09
  -6   4   2    1.70    1.20
   5  -4  -2    3.23    1.99
  -5  -4   2    3.08    2.09
   5   4  -2    2.94    2.43
  -5   4   2    1.99    1.24
   5   4  -2    1.23    1.67
  -5   4   2    5.08    1.75
  -4  -4   2    5.68    2.12
   4  -4  -2    6.73    2.29
   4  -4  -2    5.63    2.07
   4   4  -2    7.06    2.52
  -4   4   2    6.75    1.73
   4   4  -2    4.31    1.57
  -3  -4   2    7.92    2.06
   3  -4  -2    7.21    1.86
  -3  -4   2    3.31    1.58
   3  -4  -2    7.07    1.78
  -3   4   2    6.46    1.13
  -3   4   2    8.32    1.92
   3   4  -2    7.71    2.68
  -2  -4   2  228.24    8.88
  -2  -4   2  240.48    9.70
  -2  -4   2  224.71    8.40
   2  -4  -2  221.93    8.19
  -2  -4   2  219.81   10.53
   2  -4  -2  231.24    7.87
   2   4  -2  230.45   11.12
  -2   4   2  229.58    9.25
   2   4  -2  225.72    6.74
  -1  -4   2  423.20   15.55
   1  -4  -2  405.40   10.80
  -1  -4   2  382.57   11.23
   1  -4  -2  402.28   10.59
  -1  -4   2  393.82   14.33
   1  -4  -2  398.02   13.48
  -1  -4   2  396.68   14.13
   1   4  -2  398.08   15.26
  -1   4   2  392.14   13.81
   0  -4   2   -0.83    0.88
   0  -4  -2   -0.48    0.84
   0  -4   2   -0.77    0.88
   0  -4  -2    0.30    0.97
   0   4   2   -0.51    0.88
   1  -4   2  527.30   17.24
  -1  -4  -2  554.27   18.05
   1  -4   2  550.03   14.31
  -1  -4  -2  555.98   15.06
  -1  -4  -2  562.34   18.41
   1  -4   2  565.01   14.30
  -1  -4  -2  507.44   18.48
  -1  -4  -2  560.21   15.06
   1  -4   2  539.23   19.05
   1   4   2  545.19   18.27
  -2  -4  -2   -0.35    1.24
   2  -4   2    2.21    1.04
   2  -4   2    1.26    0.84
  -2  -4  -2    1.75    1.02
  -2  -4  -2    1.25    1.01
   2  -4   2    0.47    0.99
  -2  -4  -2    0.28    1.07
  -2  -4  -2    2.89    1.41
   2   4   2    2.61    1.53
   2   4   2    1.35    0.74
   3  -4   2  348.09   11.86
  -3  -4  -2  334.25   12.11
  -3  -4  -2  326.57   11.90
  -3  -4  -2  325.62   12.88
   3  -4   2  328.57   10.79
  -3  -4  -2  324.42   12.93
   3  -4   2  311.59   11.14
   3   4   2  308.28   13.63
  -3   4  -2  314.18    9.75
  -4  -4  -2   64.27    6.02
   4  -4   2   61.21    5.99
  -4  -4  -2   64.71    5.78
   4  -4   2   71.44    5.09
   4   4   2   65.56    5.57
   4   4   2   69.82    7.51
  -5  -4  -2  355.98   14.67
  -5  -4  -2  345.12   14.31
   5  -4   2  363.93   14.71
  -5   4  -2  352.22   12.63
   5   4   2  359.97   14.14
   5   4   2  344.22   16.23
  -6  -4  -2  206.89   11.22
  -6  -4  -2  188.94   10.17
   6  -4   2  199.75   11.16
   6   4   2  210.27   12.74
   6   4   2  196.30   10.45
  -7  -4  -2   -0.81    1.66
   7  -4   2    2.03    2.50
   8  -4   2   95.44   10.16
  -8  -4  -2   88.32    9.70
  -9  -4  -2  344.71   18.66
   9  -4   2  372.93   19.62
   8  -5  -2   75.13    9.54
  -8  -5   2   96.81   10.77
  -7  -5   2   32.21    5.96
   7  -5  -2   40.32    6.51
  -6  -5   2  122.88    8.93
   6  -5  -2   95.98    9.07
   6   5  -2  100.60   10.99
  -6   5   2  118.67    6.62
   5  -5  -2  145.15    8.79
  -5  -5   2  150.30    9.16
  -5   5   2  148.25    7.61
   5   5  -2  154.37   11.21
  -4  -5   2  134.95    8.76
   4  -5  -2  150.17    8.13
   4  -5  -2  136.34    7.78
  -4  -5   2  149.50    8.41
  -4   5   2  149.42    7.66
   4   5  -2  143.07    6.73
   4   5  -2  165.87   10.87
   3  -5  -2  131.41    6.62
   3  -5  -2  127.92    6.26
  -3  -5   2  116.93    7.75
  -3  -5   2  123.61    6.88
  -3  -5   2  119.95    6.68
  -3  -5   2  130.81    8.42
   3   5  -2  132.52    9.15
  -3   5   2  123.18    6.94
  -2  -5   2  473.12   16.70
  -2  -5   2  480.25   18.36
  -2  -5   2  484.29   17.61
   2  -5  -2  459.31   13.62
  -2  -5   2  446.88   14.89
  -2  -5   2  457.16   14.43
   2  -5  -2  441.70   15.43
   2  -5  -2  450.49   14.06
  -2   5   2  453.31   16.31
   2   5  -2  459.81   18.46
  -1  -5   2  138.27    8.63
  -1  -5   2  135.27    4.95
  -1  -5   2  153.14    8.15
   1  -5  -2  142.09    7.30
   1  -5  -2  137.06    8.01
  -1  -5   2  142.87    8.04
   1  -5  -2  135.96    4.21
  -1   5   2  146.11    7.78
   1   5  -2  155.53    8.88
   0  -5   2   22.54    3.99
   0  -5  -2   39.52    4.71
   0  -5  -2   28.56    4.09
   0  -5   2   33.96    4.44
   0   5   2   26.84    3.99
  -1  -5  -2   67.80    6.37
  -1  -5  -2   80.12    5.68
   1  -5   2  105.31    7.17
  -1  -5  -2   83.79    3.54
  -1  -5  -2   79.64    3.46
  -1  -5  -2   80.07    7.41
   1  -5   2   88.84    5.61
   1   5   2   65.90    6.28
  -2  -5  -2 1674.07   48.20
  -2  -5  -2 1778.28   45.03
  -2  -5  -2 1784.88   48.75
   2  -5   2 1706.34   46.63
  -2  -5  -2 1658.39   44.77
   2  -5   2 1696.60   43.73
  -2  -5  -2 1754.66   49.01
   2  -5   2 1675.55   44.20
   2   5   2 1719.65   49.21
  -3  -5  -2   54.47    5.83
  -3  -5  -2   63.29    6.42
   3  -5   2   69.28    4.41
  -3  -5  -2   54.84    4.87
  -3  -5  -2   60.66    5.22
   3  -5   2   62.27    3.96
   3  -5   2   59.55    4.20
   3   5   2   70.73    7.43
   4  -5   2  213.94    9.76
   4  -5   2  242.96   10.33
  -4  -5  -2  239.73   11.48
  -4  -5  -2  239.68   10.56
   4   5   2  187.21    8.75
   4   5   2  260.58   13.33
   5  -5   2   44.46    5.45
  -5  -5  -2   44.17    5.41
   5   5   2   66.02    8.43
   6  -5   2  165.69   10.10
  -6  -5  -2  158.23    9.88
   6   5   2  131.49   12.35
   7  -5   2    8.98    3.58
  -7  -5  -2    7.26    3.27
   8  -5   2    2.26    2.84
  -8  -5  -2    1.21    2.84
  -8  -6   2  180.65   12.70
   8  -6  -2  161.14   14.11
   7  -6  -2   12.73    4.12
  -7  -6   2   14.71    4.41
  -6  -6   2   15.22    4.22
   6  -6  -2   17.85    4.25
  -5  -6   2   48.27    6.12
   5  -6  -2   50.93    6.13
   5   6  -2   44.28    7.59
  -5   6   2   43.28    5.22
  -4  -6   2    0.86    1.57
   4  -6  -2    3.34    1.80
   4   6  -2    4.40    2.54
  -4   6   2    2.17    1.78
   3  -6  -2   12.41    2.37
  -3  -6   2   13.39    2.72
  -3  -6   2    5.63    2.61
   3  -6  -2   10.51    2.28
  -3  -6   2   14.47    2.92
  -3  -6   2   13.47    3.26
   3   6  -2   12.39    3.93
  -3   6   2   15.14    3.30
  -2  -6   2    7.31    2.90
  -2  -6   2   11.04    3.05
  -2  -6   2    7.42    2.08
  -2  -6   2    3.21    1.50
   2  -6  -2    7.38    2.14
   2  -6  -2    4.63    1.31
   2  -6  -2    2.74    1.42
  -2  -6   2    7.99    2.83
   2   6  -2    5.11    2.47
  -2   6   2    8.16    2.43
   1  -6  -2   91.65    8.27
  -1  -6   2   99.72    7.12
  -1  -6   2   92.53    8.73
  -1  -6   2   94.27    4.00
  -1  -6   2   84.78    7.93
   1  -6  -2  103.22    6.61
   1   6  -2   83.95    8.14
  -1   6   2  104.07    6.99
   0  -6   2  152.15    8.66
   0  -6  -2  135.83    8.73
   0  -6   2  137.14    9.31
   0  -6  -2  140.58    8.27
   1  -6   2    7.72    2.38
   1  -6   2    4.11    2.42
  -1  -6  -2    6.79    1.22
  -1  -6  -2    7.91    2.65
  -1  -6  -2    3.94    2.08
  -1  -6  -2    2.32    2.10
  -1  -6  -2    6.08    1.17
  -2  -6  -2  190.31   10.37
  -2  -6  -2  182.88   10.01
   2  -6   2  162.02    8.62
  -2  -6  -2  168.84    7.13
   2  -6   2  172.88    6.19
   2  -6   2  190.93    6.76
  -2  -6  -2  181.56   10.36
  -2  -6  -2  163.34    6.99
   2   6   2  170.08   10.24
   3  -6   2  184.56    8.81
  -3  -6  -2  194.16    8.72
   3  -6   2  192.69    7.79
  -3  -6  -2  177.15    8.35
  -3  -6  -2  187.83   10.39
   3  -6   2  188.09    8.10
   3   6   2  187.87   11.35
  -4  -6  -2    0.68    1.38
   4  -6   2   -0.06    1.26
   4   6   2    1.47    2.06
  -5  -6  -2   77.49    7.55
   5  -6   2   62.91    6.56
   5   6   2   68.71    9.21
   6  -6   2    0.57    2.05
  -6  -6  -2    0.56    2.09
   6   6   2   -1.41    2.39
   7  -6   2   -1.18    1.85
  -7  -6  -2   -0.38    2.29
  -8  -6  -2    8.62    3.75
   8  -6   2    6.77    3.60
  -7  -7   2    2.75    2.61
   7  -7  -2    5.17    3.28
   6  -7  -2   41.07    6.32
  -6  -7   2   36.80    6.02
  -5  -7   2  184.32   10.52
   5  -7  -2  154.91    9.49
   4  -7  -2   30.94    4.39
  -4  -7   2   33.34    4.86
   4   7  -2   33.80    6.45
   3  -7  -2    4.75    1.69
  -3  -7   2    2.41    2.39
  -3  -7   2    2.22    1.53
  -3  -7   2    6.79    2.49
   3   7  -2    5.56    3.20
   2  -7  -2   93.09   11.55
   2  -7  -2  101.49    5.02
  -2  -7   2  107.21    5.86
  -2  -7   2   96.81    5.38
  -2  -7   2  109.00    7.94
  -2  -7   2  100.10    9.98
   2  -7  -2  112.04    4.96
   2  -7  -2  102.02    9.94
   2   7  -2   99.50    9.92
  -1  -7   2   -1.42    1.31
  -1  -7   2    1.09    1.96
   1  -7  -2    3.08    2.15
  -1  -7   2   -0.89    0.60
   0  -7  -2   16.49    4.34
   0  -7   2   18.29    4.32
  -1  -7  -2  278.34    8.94
   1  -7   2  283.27   15.32
  -1  -7  -2  288.62    9.01
   1  -7   2  280.44   14.24
  -1  -7  -2  290.61   14.77
  -1  -7  -2  282.40   14.45
  -2  -7  -2   55.53    6.95
   2  -7   2   46.15    2.82
  -2  -7  -2   46.23    6.61
  -2  -7  -2   50.78    3.66
   2  -7   2   48.97    3.13
   2  -7   2   46.46    7.25
   2  -7   2   41.50    5.38
  -2  -7  -2   50.05    4.18
   2   7   2   48.02    6.89
   3  -7   2   14.05    3.21
   3  -7   2   11.07    2.25
  -3  -7  -2    9.88    2.37
  -3  -7  -2    7.67    3.22
  -3  -7  -2    6.14    2.92
   3   7   2   10.97    3.66
  -4  -7  -2   80.40    6.95
  -4  -7  -2   95.38    9.41
   4  -7   2   87.07    5.94
   4   7   2   65.37    8.67
  -5  -7  -2    2.05    1.95
   5  -7   2    0.00    1.56
   5   7   2   -0.47    2.22
  -6  -7  -2  232.70   12.76
   6  -7   2  242.79   12.86
   7  -7   2   23.02    5.22
  -7  -7  -2   27.98    5.57
  -6  -8   2    6.82    3.27
   6  -8  -2   -0.37    2.25
   5  -8  -2    1.32    1.75
  -5  -8   2    6.44    2.71
   4  -8  -2    0.79    1.41
  -4  -8   2    3.21    2.11
  -3  -8   2  299.86   14.53
  -3  -8   2  283.21   11.82
   3  -8  -2  272.43   10.85
   3   8  -2  241.31   15.61
  -2  -8   2   42.03    6.49
  -2  -8   2   33.93    3.96
   2  -8  -2   31.86    6.23
   2  -8  -2   36.97    3.41
   2   8  -2   32.74    6.38
  -1  -8   2  233.99    8.23
   1  -8  -2  220.18   13.87
  -1  -8   2  252.76   13.67
  -1  -8   2  246.04   14.85
   0  -8   2  497.07   20.98
   0  -8  -2  460.95   20.95
   0  -8   2  461.98   21.84
  -1  -8  -2    2.98    1.10
  -1  -8  -2    3.71    1.15
  -1  -8  -2    0.78    2.39
   1  -8   2   -2.21    2.28
  -1  -8  -2    1.38    2.30
  -2  -8  -2  120.23   11.37
  -2  -8  -2  122.51    5.98
  -2  -8  -2  132.32   11.74
   2  -8   2  120.89    5.21
  -3  -8  -2   24.94    3.45
   3  -8   2   16.23    2.66
  -3  -8  -2   15.41    4.14
   3   8   2   22.61    5.30
   4  -8   2   35.15    4.42
  -4  -8  -2   23.96    4.03
  -4  -8  -2   37.90    6.42
   4   8   2   39.02    7.31
   5  -8   2   41.34    5.45
  -5  -8  -2   35.27    5.26
   6  -8   2    3.72    2.69
  -6  -8  -2   -0.30    2.00
  -5  -9   2   37.43    5.81
   5  -9  -2   37.45    5.64
   4  -9  -2   81.70    7.18
  -4  -9   2  108.16    7.53
  -3  -9   2   15.76    4.38
  -3  -9   2   11.12    2.85
   3  -9  -2   15.14    2.82
  -2  -9   2   -0.11    2.06
   2  -9  -2    0.72    1.16
  -2  -9   2   -0.83    1.09
  -1  -9   2    6.52    1.79
  -1  -9   2    6.97    2.95
   0  -9   2   15.32    4.66
   0  -9  -2   16.14    5.13
  -1  -9  -2  212.01   14.08
  -1  -9  -2  214.83    7.49
  -2  -9  -2  106.30    5.59
   2  -9   2   99.73    4.63
  -2  -9  -2  105.04   11.14
   3  -9   2    5.51    1.81
  -3  -9  -2   11.71    2.60
  -3  -9  -2    3.14    3.03
  -4  -9  -2  191.98   10.04
  -4  -9  -2  192.31   12.83
   4  -9   2  196.89    9.52
  -5  -9  -2   23.15    4.53
   5  -9   2   10.54    3.23
  -4 -10   2   61.24    6.93
   4 -10  -2   70.34    6.62
  -3 -10   2   83.40    6.00
  -3 -10   2   83.90   10.06
   3 -10  -2   64.42    4.77
  -2 -10   2   -1.55    2.09
   2 -10  -2   -0.27    1.02
  -2 -10   2   -0.54    1.28
  -1 -10   2   74.07    9.59
  -1 -10   2   77.57    4.21
   0 -10  -2  140.64   14.27
   0 -10   2  142.14   13.71
   1 -10   2   47.16    8.30
  -1 -10  -2   61.66    9.91
  -1 -10  -2   51.41    3.19
  -2 -10  -2   25.29    3.20
  -2 -10  -2   35.45    7.17
   2 -10   2   26.98    2.61
  -3 -10  -2   22.62    5.63
   3 -10   2   26.29    3.35
  -3 -10  -2   24.17    3.73
  -4 -10  -2  199.74   10.30
   4 -10   2  196.63    9.52
  -4 -10  -2  172.43   12.98
   1 -11  -2    0.76    3.50
  -1 -11   2   -1.43    2.38
   0 -11  -2   -0.42    3.16
   0 -11   2    0.79    3.30
   1 -11   2   47.13    8.66
  -1 -11  -2   55.39    9.50
  -9   0   3   57.96    8.62
   9   0  -3   98.42   11.34
  -8   0   3    1.53    2.32
   8   0  -3    1.83    2.30
  -7   0   3 1732.47   51.85
   7   0  -3 1763.32   52.73
   6   0  -3   -0.39    1.68
  -6   0   3    3.38    2.19
   5   0  -3 3134.80   83.83
  -5   0   3 3149.66   83.36
   4   0  -3    0.23    1.29
  -4   0   3   -0.19    1.13
  -3   0   3    2.15    1.44
   3   0  -3    0.68    1.30
   2   0  -3   -2.29    0.46
  -2   0   3   -1.82    0.57
   0   0  -3   -2.95    0.24
   0   0  -3   -3.11    0.15
   0   0   3   -3.12    0.20
   0   0   3   -3.02    0.19
   0   0   3   -3.12    0.12
   0   0  -3   -3.07    0.11
   1   0   3 5902.67  146.74
  -1   0  -3 5839.00  146.11
   1   0   3 5871.38  146.04
  -1   0  -3 6170.78  146.54
  -2   0  -3   -0.65    0.60
   2   0   3   -0.43    0.59
  -2   0  -3   -1.04    0.20
  -3   0  -3  347.20   11.70
   3   0   3  368.01   12.17
  -3   0  -3  332.56    9.35
  -4   0  -3    0.74    0.51
  -4   0  -3   -0.71    0.84
   4   0   3    0.50    1.04
  -5   0  -3    5.01    0.94
  -5   0  -3    1.43    1.47
   5   0   3    5.49    2.19
   6   0   3   -0.85    1.06
  -6   0  -3    0.17    0.61
  -6   0  -3    2.02    1.76
   7   0   3    0.64    2.21
  -7   0  -3    1.55    2.13
  -8   0  -3    3.48    2.50
   8   0   3    4.71    2.94
   9   0   3  180.12   12.96
  -9   0  -3  188.94   12.62
  -9  -1   3   18.86    5.14
   9  -1  -3   28.65    6.46
   9   1  -3   14.86    4.86
   8  -1  -3  124.26   12.26
  -8  -1   3  131.27   11.74
   8   1  -3  103.25   10.46
  -8   1   3   93.58    9.77
  -7  -1   3   99.67    9.48
   7  -1  -3  107.01   10.08
   7   1  -3  100.07    9.58
  -7   1   3  123.31    8.65
  -6  -1   3   21.17    4.18
   6  -1  -3   21.53    4.34
  -6   1   3   35.06    5.12
   6   1  -3   26.96    4.84
  -5  -1   3  142.99    8.29
   5  -1  -3  138.81    8.31
  -5   1   3  132.68    7.74
   5   1  -3  126.94    7.83
   4  -1  -3    6.73    2.02
  -4  -1   3    8.05    2.16
   4   1  -3    6.86    2.10
  -4   1   3    2.39    1.33
  -3  -1   3  111.63    6.13
   3  -1  -3  105.63    5.92
  -3   1   3  105.69    5.60
   3   1  -3  101.13    5.68
  -2  -1   3  319.27   11.32
   2  -1  -3  346.60   11.37
   2  -1  -3  335.50   11.18
  -2  -1   3  321.34   11.21
  -2   1   3  348.40   10.97
   2   1  -3  329.78   11.03
  -1  -1   3  129.73    4.97
  -1  -1   3  142.99    5.48
   1  -1  -3  127.67    4.96
   1   1  -3  136.83    5.52
  -1   1   3  122.27    4.83
   1   1  -3  131.10    4.90
   1   1  -3  122.36    5.16
  -1   1   3  132.11    4.88
   0  -1   3  387.43   10.56
   0  -1  -3  368.57   10.23
   0  -1   3  362.07   11.24
   0  -1   3  383.48   10.52
   0  -1  -3  379.57   10.77
   0   1  -3  379.69   11.26
   0   1  -3  387.29   10.35
   0   1   3  381.23   10.13
  -1  -1  -3  248.02    7.39
  -1  -1  -3  238.62    7.90
   1  -1   3  232.06    7.39
   1  -1   3  249.30    7.35
  -1  -1  -3  243.68    7.39
  -1  -1  -3  244.86    7.62
  -1   1  -3  251.87    7.46
   1   1   3  239.09    8.14
   1   1   3  236.35    7.65
  -1   1  -3  245.74    7.32
   1   1   3  250.58    7.51
   1   1   3  235.97    7.35
  -2  -1  -3 1470.04   38.65
   2  -1   3 1479.99   38.54
  -2  -1  -3 1485.02   37.88
  -2  -1  -3 1495.73   38.98
   2  -1   3 1482.07   38.78
  -2   1  -3 1512.83   38.37
   2   1   3 1472.32   38.83
   2   1   3 1449.55   39.05
  -3  -1  -3    2.97    0.92
  -3  -1  -3    1.50    1.00
   3  -1   3    1.09    0.89
   3   1   3    1.31    0.98
  -3   1  -3    0.67    0.92
  -4  -1  -3    1.79    1.29
   4  -1   3    0.05    1.08
  -4  -1  -3    1.13    0.78
  -4   1  -3    1.17    1.00
   4   1   3   -0.16    1.06
   5  -1   3   93.26    6.38
  -5  -1  -3   81.28    5.79
  -5  -1  -3   80.71    4.18
  -5   1  -3   76.47    5.47
   5   1   3   75.26    6.65
  -6  -1  -3   94.26    8.24
   6  -1   3   96.04    8.60
  -6  -1  -3   89.85    4.68
  -6   1  -3   94.86    6.71
   7  -1   3   28.41    5.25
  -7  -1  -3   22.60    4.41
  -7   1  -3   28.24    4.71
   7   1   3   21.18    4.39
  -8  -1  -3  931.14   32.32
   8  -1   3  892.26   32.71
  -8   1  -3  947.23   31.97
   8   1   3  889.76   32.56
   9  -1   3   77.49    9.88
  -9  -1  -3   82.44    9.81
   9   1   3   72.06    9.36
  -9  -2   3   56.06    8.43
   9  -2  -3   63.14    9.54
  -8  -2   3  281.26   15.23
   8  -2  -3  270.48   15.32
   8   2  -3  241.44   14.18
   7  -2  -3  400.11   18.58
  -7  -2   3  418.71   18.55
  -7   2   3  438.56   17.63
   7   2  -3  401.41   17.95
   6  -2  -3  215.62   11.73
  -6  -2   3  194.67   11.15
   6   2  -3  198.28   10.92
  -6   2   3  209.00   10.54
   5  -2  -3 2030.82   56.21
  -5  -2   3 1954.81   55.96
   5   2  -3 1949.22   55.33
  -5   2   3 2059.71   54.84
  -4  -2   3   36.54    4.57
   4  -2  -3   39.94    4.63
  -4   2   3   45.92    4.46
   4   2  -3   43.36    4.61
  -3  -2   3  564.62   17.87
   3  -2  -3  540.97   17.45
   3   2  -3  512.24   16.81
  -3   2   3  521.16   16.39
   3   2  -3  543.37   18.41
  -2  -2   3  209.55    8.33
   2  -2  -3  205.02    7.93
   2  -2  -3  214.49    7.89
  -2  -2   3  207.31    7.99
   2   2  -3  215.81    7.91
   2   2  -3  214.55    9.09
   2   2  -3  206.00    7.61
  -2   2   3  207.82    7.25
  -1  -2   3 1752.43   43.80
  -1  -2   3 1726.62   43.26
   1  -2  -3 1693.18   42.98
  -1  -2   3 1710.43   45.09
   1  -2  -3 1759.09   43.11
  -1  -2   3 1715.34   43.16
  -1   2   3 1735.43   43.51
   1   2  -3 1718.65   45.21
  -1   2   3 1479.05   42.05
   1   2  -3 1665.08   43.63
   0  -2   3  143.46    4.44
   0  -2  -3  142.68    4.79
   0  -2   3  135.89    6.22
   0  -2   3  143.10    4.55
   0  -2  -3  147.30    4.30
   0  -2  -3  135.68    5.37
   0  -2  -3  136.23    5.16
   0   2   3  146.89    5.63
   0   2  -3  141.09    6.20
  -1  -2  -3 6197.20  146.51
  -1  -2  -3 6024.85  146.83
  -1  -2  -3 5855.69  146.69
  -1  -2  -3 5978.97  147.30
  -1  -2  -3 5992.81  147.92
   1  -2   3 6159.26  146.32
   1   2   3 5491.96  147.90
   1   2   3 6139.60  148.27
   1   2   3 5960.25  147.92
  -1   2  -3 5745.16  145.88
  -2  -2  -3 2492.66   62.89
   2  -2   3 2390.22   62.18
   2  -2   3 2473.52   61.27
  -2  -2  -3 2522.27   63.61
   2  -2   3 2515.20   62.66
  -2  -2  -3 2434.31   62.85
  -2  -2  -3 2515.23   62.73
   2   2   3 2527.43   63.36
   2   2   3 2429.97   62.70
  -2   2  -3 2492.77   61.96
   2   2   3 2334.04   64.15
  -3  -2  -3  508.14   16.48
   3  -2   3  531.56   16.64
  -3  -2  -3  522.36   16.02
  -3   2  -3  525.44   15.78
   3   2   3  538.04   16.57
  -4  -2  -3  472.63   15.98
  -4  -2  -3  450.58   14.59
   4  -2   3  440.52   15.88
   4   2   3  447.07   15.78
  -4   2  -3  458.57   14.98
  -5  -2  -3    1.89    1.68
  -5  -2  -3    1.66    1.05
   5  -2   3   -0.55    1.10
   5   2   3   -0.97    1.00
  -5   2  -3    1.06    1.32
   6  -2   3   80.19    7.68
  -6  -2  -3   77.51    7.21
  -6  -2  -3   74.24    4.84
  -6   2  -3   71.50    6.59
   6   2   3   74.65    7.24
   7  -2   3   38.30    5.86
  -7  -2  -3   47.46    6.30
   7   2   3   49.76    6.73
  -7   2  -3   68.80    7.34
  -8  -2  -3   32.45    5.93
   8  -2   3   23.80    5.06
   8   2   3   32.17    5.76
  -9  -2  -3  114.81   11.82
   9  -2   3  118.56   12.26
   9  -3  -3    7.82    4.39
  -9  -3   3    7.56    4.00
   8  -3  -3  401.04   19.68
  -8  -3   3  408.31   19.55
   7  -3  -3  321.38   15.92
  -7  -3   3  293.71   15.28
   7   3  -3  293.84   14.54
  -6  -3   3    7.36    2.99
   6  -3  -3    7.54    3.03
  -6   3   3    9.83    2.02
   6   3  -3    3.64    2.17
   6   3  -3    7.61    3.05
  -6   3   3    6.22    2.36
   5  -3  -3   83.38    7.74
  -5  -3   3   86.17    7.91
  -5   3   3   85.09    4.62
   5   3  -3   70.50    7.91
  -5   3   3   83.54    5.51
   5   3  -3   83.81    7.32
   4  -3  -3  132.71    7.40
  -4  -3   3  110.50    7.14
   4   3  -3  122.77    6.62
  -4   3   3  121.21    6.08
  -4   3   3  130.28    5.77
   4   3  -3  122.28    8.19
   3  -3  -3  824.37   25.09
  -3  -3   3  830.34   25.55
   3  -3  -3  827.30   24.86
   3   3  -3  895.60   24.39
  -3   3   3  887.14   23.98
   3   3  -3  844.97   27.30
  -3   3   3  796.51   23.18
   2  -3  -3    9.26    1.80
  -2  -3   3    9.38    1.89
  -2  -3   3   10.33    2.26
   2  -3  -3    8.33    1.65
  -2   3   3    7.87    1.60
   2   3  -3   11.35    2.58
   2   3  -3    8.83    2.15
  -2   3   3   10.17    1.28
   1  -3  -3   93.77    3.78
  -1  -3   3   96.44    4.40
   1  -3  -3   93.72    3.70
   1  -3  -3   96.52    4.67
  -1  -3   3  100.37    4.01
  -1  -3   3  102.58    4.93
  -1  -3   3  109.06    6.16
   1   3  -3   86.67    5.63
  -1   3   3   93.49    4.82
   0  -3  -3  315.48   10.90
   0  -3  -3  326.76    8.61
   0  -3   3  308.84    8.71
   0  -3  -3  315.66   10.98
   0  -3   3  326.05   12.28
   0  -3   3  336.87    8.66
   0   3   3  321.86   11.21
   0   3  -3  342.52   12.24
   1  -3   3   -0.28    0.56
   1  -3   3    0.21    0.35
  -1  -3  -3   -0.58    0.80
  -1  -3  -3    0.72    0.77
  -1  -3  -3    0.05    0.36
  -1  -3  -3    1.09    0.65
   1  -3   3   -0.26    0.34
  -1  -3  -3   -0.32    0.51
   1   3   3   -0.05    0.63
   1   3   3    1.15    0.94
  -2  -3  -3  448.25   14.96
  -2  -3  -3  412.66   13.17
   2  -3   3  432.26   13.09
  -2  -3  -3  421.52   13.31
   2  -3   3  425.56   12.66
  -2  -3  -3  436.40   14.37
   2  -3   3  424.77   13.00
  -2   3  -3  432.14   12.18
   2   3   3  451.79   14.84
   3  -3   3  521.94   16.12
   3  -3   3  494.78   15.59
  -3  -3  -3  518.83   16.51
  -3  -3  -3  488.46   16.02
   3  -3   3  506.29   14.06
  -3   3  -3  427.86   14.49
   3   3   3  511.12   15.93
   3   3   3  534.36   17.58
   4  -3   3    2.01    1.35
  -4  -3  -3    0.56    1.06
  -4  -3  -3    1.26    1.20
   4   3   3    0.40    1.19
  -4   3  -3    0.48    0.86
   4   3   3   -0.36    0.95
   5  -3   3   29.63    4.35
  -5  -3  -3   23.22    3.65
  -5  -3  -3   17.33    3.05
   5   3   3   26.04    4.00
  -5   3  -3   24.67    3.49
   6  -3   3  225.27   11.68
  -6  -3  -3  224.02   11.48
  -6  -3  -3  221.66   10.02
  -6   3  -3  209.72   10.23
   6   3   3  221.82   11.28
   7  -3   3   21.63    4.86
  -7  -3  -3   13.35    3.79
   7   3   3   14.08    3.90
  -8  -3  -3  165.75   11.52
   8  -3   3  175.75   11.88
   9  -3   3  144.90   13.59
  -9  -3  -3  172.87   14.64
  -9  -4   3   21.02    5.58
   9  -4  -3   18.69    5.73
   8  -4  -3    8.95    4.23
  -8  -4   3    7.14    3.46
   7  -4  -3   58.94    7.95
  -7  -4   3   59.03    7.54
  -6  -4   3  208.19   11.85
   6  -4  -3  190.73   11.44
   6   4  -3  220.77   11.09
  -6   4   3  220.95    9.05
   6   4  -3  220.69   13.84
  -5  -4   3  237.77   11.86
   5  -4  -3  231.26   11.44
  -5   4   3  226.50    9.32
   5   4  -3  213.09   12.95
   5   4  -3  243.90   10.69
  -5   4   3  217.76    9.29
  -4  -4   3  181.96    9.39
   4  -4  -3  173.35    8.96
  -4   4   3  191.68    8.14
   4   4  -3  194.16   11.27
   4   4  -3  175.68    8.09
   3  -4  -3  121.95    6.32
  -3  -4   3  118.52    6.66
  -3  -4   3  131.51    7.07
   3  -4  -3  140.63    6.84
  -3   4   3  129.82    6.45
  -3   4   3  126.13    4.71
   3   4  -3  118.70    8.22
  -2  -4   3   46.08    3.34
  -2  -4   3   37.50    4.84
   2  -4  -3   50.77    3.17
   2  -4  -3   47.26    3.33
  -2  -4   3   55.57    4.09
  -2   4   3   56.13    4.92
   2   4  -3   45.86    5.64
   2   4  -3   52.25    2.40
  -1  -4   3 1487.44   40.79
  -1  -4   3 1478.96   42.76
  -1  -4   3 1454.64   38.00
   1  -4  -3 1448.51   40.14
  -1  -4   3 1533.57   38.83
   1  -4  -3 1496.33   37.61
   1  -4  -3 1476.78   37.49
   1   4  -3 1458.92   42.66
  -1   4   3 1527.34   40.92
   0  -4   3   81.87    5.18
   0  -4   3   68.08    6.50
   0  -4  -3   80.48    2.59
   0  -4  -3   78.61    5.13
   0  -4  -3   84.56    5.06
   0   4   3   70.53    4.89
  -1  -4  -3 1716.85   42.78
   1  -4   3 1671.95   42.20
   1  -4   3 1706.15   47.71
  -1  -4  -3 1581.85   46.92
  -1  -4  -3 1718.20   43.09
   1  -4   3 1674.17   42.30
  -1  -4  -3 1731.87   46.28
  -1  -4  -3 1669.95   45.89
   1  -4   3 1696.96   45.48
   1   4   3 1653.89   45.95
   1   4   3 1744.70   46.50
  -2  -4  -3 3713.69   96.33
  -2  -4  -3 3791.51   95.70
   2  -4   3 3812.49   92.78
   2  -4   3 3762.09   93.98
  -2  -4  -3 3657.33   95.15
  -2  -4  -3 3654.48   93.22
  -2  -4  -3 3744.30   93.20
   2  -4   3 3707.65   92.26
   2   4   3 3761.48   96.25
   2   4   3 3531.06   91.88
   3  -4   3  341.64   12.07
  -3  -4  -3  340.41   13.28
  -3  -4  -3  349.35   12.57
   3  -4   3  340.82   11.66
  -3  -4  -3  348.15   13.60
  -3  -4  -3  356.30   12.42
   3  -4   3  341.31   11.30
  -3   4  -3  333.36   10.41
   3   4   3  356.00   14.37
   4  -4   3   51.72    5.04
  -4  -4  -3   50.06    5.05
  -4  -4  -3   49.68    5.23
   4   4   3   50.59    6.38
   4   4   3   50.89    4.86
   5  -4   3  183.17    9.64
  -5  -4  -3  183.59    9.46
  -5  -4  -3  184.63    9.74
   5   4   3  179.43   10.87
   5   4   3  170.03    9.08
  -5   4  -3  191.22    8.29
  -6  -4  -3    6.28    2.39
  -6  -4  -3    6.70    2.62
   6  -4   3    4.21    2.42
   6   4   3   10.14    3.03
   6   4   3    5.90    2.91
  -7  -4  -3    0.94    2.02
   7  -4   3   -2.86    1.44
  -8  -4  -3    4.56    3.15
   8  -4   3    2.92    2.92
  -8  -5   3  179.93   12.76
   8  -5  -3  208.71   13.67
   7  -5  -3    2.50    2.47
  -7  -5   3    5.04    3.19
   6  -5  -3    0.98    2.06
  -6  -5   3   -2.12    1.66
  -6   5   3    0.43    1.29
   6   5  -3   -1.41    2.16
  -5  -5   3    2.60    1.96
   5  -5  -3   -2.03    1.23
   5   5  -3    1.53    2.28
  -5   5   3   -1.21    1.05
  -4  -5   3   15.59    3.43
   4  -5  -3   15.24    3.22
   4  -5  -3   12.26    2.82
   4   5  -3   12.66    2.27
   4   5  -3   18.10    4.44
  -4   5   3   12.67    2.66
   3  -5  -3   35.39    3.91
  -3  -5   3   34.52    4.99
  -3  -5   3   38.41    4.45
  -3  -5   3   44.64    4.93
   3  -5  -3   34.53    3.96
   3   5  -3   39.64    5.81
  -3   5   3   39.32    4.52
   2  -5  -3    0.73    0.88
  -2  -5   3    0.67    0.90
  -2  -5   3    0.85    1.43
  -2  -5   3    1.43    1.28
   2  -5  -3    0.36    0.68
  -2   5   3   -0.22    1.03
   2   5  -3    0.32    1.33
   1  -5  -3  312.81    9.00
  -1  -5   3  314.77   12.68
   1  -5  -3  310.58    9.04
  -1  -5   3  312.31   13.03
  -1  -5   3  313.98    9.58
   1  -5  -3  323.85   12.27
   1  -5  -3  305.43   12.91
  -1  -5   3  292.72   13.75
  -1  -5   3  310.91   10.21
  -1   5   3  317.52   12.75
   1   5  -3  295.11   13.66
   0  -5  -3  222.55    6.06
   0  -5  -3  216.05   10.24
   0  -5   3  218.05   10.07
   0  -5  -3  212.02    9.73
   0  -5   3  228.87   11.46
   0   5   3  204.78   10.00
  -1  -5  -3    1.82    1.70
   1  -5   3    3.72    1.71
  -1  -5  -3    4.76    1.02
  -1  -5  -3    4.68    1.82
   1  -5   3    4.13    0.75
   1  -5   3    6.64    2.13
  -1  -5  -3    4.08    1.04
   1  -5   3    3.40    0.78
  -1  -5  -3    1.48    1.32
   1   5   3    6.12    2.03
   2  -5   3   93.35    4.09
  -2  -5  -3   90.61    6.26
  -2  -5  -3   90.46    4.67
  -2  -5  -3   93.45    4.72
   2  -5   3   92.84    4.36
   2  -5   3   89.06    5.50
  -2  -5  -3   92.05    6.67
  -2  -5  -3   80.65    5.92
   2   5   3   94.90    6.68
   3  -5   3   93.96    5.02
  -3  -5  -3   95.99    5.57
  -3  -5  -3  106.08    7.11
  -3  -5  -3   87.17    5.49
   3  -5   3   97.84    5.51
   3  -5   3  105.51    5.52
  -3  -5  -3  101.51    6.85
   3   5   3   96.36    4.76
   3   5   3  111.00    7.68
   4  -5   3  247.08   10.96
   4  -5   3  301.29   11.84
  -4  -5  -3  295.59   12.00
  -4  -5  -3  276.58   12.71
   4   5   3  290.59   14.35
  -5  -5  -3   50.44    5.88
   5  -5   3   57.24    6.32
   5   5   3   47.19    6.91
   6  -5   3  740.86   25.94
  -6  -5  -3  729.59   25.91
   6   5   3  710.57   28.67
   7  -5   3   42.38    6.42
  -7  -5  -3   51.88    7.14
  -8  -5  -3   21.19    5.22
   8  -5   3   18.91    4.94
  -8  -6   3    3.43    2.81
   8  -6  -3    3.66    3.20
   7  -6  -3   -1.87    1.81
  -7  -6   3   -2.95    1.95
   6  -6  -3   91.74    9.10
  -6  -6   3   98.00   10.00
   5  -6  -3  129.81    8.54
  -5  -6   3  137.97    9.06
   5   6  -3  147.38   14.03
  -5   6   3  123.66    7.82
  -4  -6   3   91.05    7.90
   4  -6  -3   84.98    6.16
  -4   6   3   91.75    6.59
   4   6  -3   83.31    9.65
   3  -6  -3   23.72    3.30
  -3  -6   3   19.74    3.33
   3  -6  -3   17.99    2.90
  -3  -6   3   16.05    3.96
  -3  -6   3   18.37    3.31
  -3  -6   3   24.83    4.28
   3   6  -3   20.01    4.46
  -3   6   3   23.91    3.94
  -2  -6   3  228.15    9.06
  -2  -6   3  235.03   11.20
   2  -6  -3  230.83    8.39
  -2  -6   3  232.81   12.19
   2  -6  -3  240.89   10.63
   2  -6  -3  249.01    8.86
  -2  -6   3  241.80   12.91
   2   6  -3  219.44   12.73
  -2   6   3  231.88   11.26
   1  -6  -3   82.71    3.45
   1  -6  -3   84.28    3.47
  -1  -6   3   87.18    8.03
   1  -6  -3  103.02    8.79
  -1  -6   3   89.48    8.99
   1  -6  -3   85.81    6.10
  -1  -6   3   85.29    6.47
  -1  -6   3   83.10    3.91
   1   6  -3  109.06    9.62
  -1   6   3   96.71    6.78
   0  -6  -3  432.31   16.47
   0  -6  -3  414.11   17.07
   0  -6   3  434.01   18.48
   0  -6   3  433.23   16.85
  -1  -6  -3   16.58    3.57
  -1  -6  -3   23.09    4.09
  -1  -6  -3   21.25    2.20
  -1  -6  -3   18.57    1.96
  -1  -6  -3   16.77    3.75
   1  -6   3   21.76    1.54
   1  -6   3   24.84    4.06
   1  -6   3   22.06    1.45
   1  -6   3   29.65    5.35
   2  -6   3  778.70   28.83
  -2  -6  -3  867.91   23.28
  -2  -6  -3  793.85   27.70
   2  -6   3  809.64   25.62
  -2  -6  -3  793.24   27.03
  -2  -6  -3  835.10   27.15
   2  -6   3  826.60   22.02
  -2  -6  -3  754.00   22.97
   2  -6   3  806.05   22.39
   2   6   3  829.78   27.82
   3  -6   3  262.80    9.84
  -3  -6  -3  253.88   10.68
   3  -6   3  281.13   10.39
  -3  -6  -3  266.30   13.08
   3  -6   3  256.85   11.04
  -3  -6  -3  286.00   10.92
   3   6   3  305.06   14.49
   4  -6   3    0.19    1.25
  -4  -6  -3    0.81    1.48
   4   6   3    0.40    1.91
  -5  -6  -3  348.65   14.78
   5  -6   3  340.90   14.57
   5   6   3  347.42   17.93
  -6  -6  -3    3.82    2.47
   6  -6   3    4.93    2.73
   6   6   3    0.91    2.54
  -7  -6  -3   72.94    8.39
   7  -6   3   63.37    7.75
  -8  -6  -3    4.40    3.19
   8  -6   3    8.32    3.86
  -7  -7   3    3.11    2.79
   7  -7  -3    0.12    2.52
  -6  -7   3   10.81    3.93
   6  -7  -3   29.39    5.50
   5  -7  -3    5.79    2.61
  -5  -7   3    7.23    3.04
  -5   7   3    2.85    2.13
  -4  -7   3   13.82    3.36
   4  -7  -3    7.27    2.51
  -4   7   3    6.28    2.50
   4   7  -3   14.40    4.70
  -3  -7   3    0.71    1.42
  -3  -7   3   -0.22    1.82
  -3  -7   3    3.86    2.26
   3  -7  -3   -0.50    1.07
  -3   7   3    1.58    1.69
   3   7  -3    2.57    2.43
   2  -7  -3  190.75    7.51
   2  -7  -3  196.50    7.78
  -2  -7   3  193.73    8.17
  -2  -7   3  196.23   12.28
  -2  -7   3  206.84    8.80
  -2  -7   3  189.56   10.62
   2  -7  -3  191.25   11.77
  -2   7   3  176.79   10.45
   2   7  -3  192.77   12.37
  -1  -7   3   14.99    3.72
   1  -7  -3   14.88    3.73
  -1  -7   3    8.72    3.86
   1  -7  -3   13.03    1.61
  -1  -7   3   17.03    2.12
   0  -7  -3  741.98   27.26
   0  -7   3  750.92   26.78
   0  -7   3  795.04   29.21
   1  -7   3   85.03    3.25
  -1  -7  -3   78.76    3.93
   1  -7   3   73.36    8.57
   1  -7   3   83.00    3.35
  -1  -7  -3   84.81    9.29
   1  -7   3   83.08    8.15
  -1  -7  -3   83.73    8.67
  -1  -7  -3   89.12    3.96
  -2  -7  -3  358.38   12.05
  -2  -7  -3  335.78   16.33
   2  -7   3  349.37   11.12
  -2  -7  -3  345.58   11.81
   2  -7   3  332.32   17.27
   2  -7   3  331.14   14.55
  -2  -7  -3  329.46   15.79
   2  -7   3  362.64   10.84
   2   7   3  391.74   16.98
  -3  -7  -3  598.87   22.87
  -3  -7  -3  579.18   18.85
   3  -7   3  601.53   18.32
   3  -7   3  541.58   20.02
   3   7   3  576.22   23.60
  -4  -7  -3    1.21    1.62
   4  -7   3    0.73    1.43
  -4  -7  -3    4.02    2.24
   4   7   3    3.30    2.85
  -5  -7  -3  127.73    8.43
   5  -7   3  135.69    8.31
   5   7   3  125.37   12.87
   6  -7   3  193.94   11.19
  -6  -7  -3  175.62   10.80
  -7  -7  -3  258.00   14.30
   7  -7   3  260.91   14.45
   6  -8  -3  269.61   14.35
  -6  -8   3  271.49   14.76
  -5  -8   3  133.40    9.16
   5  -8  -3  130.57    8.69
   4  -8  -3  313.97   13.51
  -4  -8   3  344.93   14.61
  -3  -8   3   46.37    6.46
   3  -8  -3   47.31    4.79
  -3  -8   3   54.17    5.67
   3   8  -3   67.61    9.55
   2  -8  -3   12.59    4.09
  -2  -8   3    7.10    3.02
  -2  -8   3    7.36    2.19
   2  -8  -3    8.65    1.93
   2   8  -3    9.47    4.12
  -1  -8   3   20.34    7.76
   1  -8  -3   22.17    4.91
  -1  -8   3   26.80    5.05
   1  -8  -3   23.48    2.24
  -1  -8   3   25.26    2.80
   0  -8  -3   96.94    3.53
   0  -8   3   89.52   11.91
   0  -8  -3   80.90    9.14
   0  -8   3   98.84   10.17
   0  -8  -3   85.93    3.91
  -1  -8  -3    3.74    2.50
  -1  -8  -3    3.49    1.43
  -1  -8  -3    6.31    3.22
  -1  -8  -3   -0.54    0.88
  -2  -8  -3  114.58   10.69
   2  -8   3  132.01    5.43
  -2  -8  -3  113.86    5.82
  -2  -8  -3  122.30   11.54
   3  -8   3  443.08   14.81
  -3  -8  -3  441.58   19.88
  -3  -8  -3  437.74   19.57
  -3  -8  -3  441.88   15.55
   3   8   3  444.10   20.63
  -4  -8  -3   59.39    6.20
  -4  -8  -3   63.25    8.01
   4  -8   3   60.37    5.74
   4   8   3   60.95    8.76
  -5  -8  -3   20.52    4.08
   5  -8   3   32.69    4.81
  -6  -8  -3    4.84    2.82
   6  -8   3    3.93    2.68
   5  -9  -3    3.20    2.75
  -5  -9   3   12.86    3.69
   4  -9  -3   14.44    3.25
  -4  -9   3   13.90    3.57
  -3  -9   3   19.05    4.60
  -3  -9   3   13.47    3.05
   3  -9  -3   14.70    2.76
  -2  -9   3    1.44    1.45
   2  -9  -3    0.41    1.12
  -2  -9   3    1.22    2.33
   1  -9  -3  248.21    8.21
  -1  -9   3  247.42   14.29
   0  -9   3   25.96    5.61
   0  -9  -3   37.11    7.35
  -1  -9  -3  201.83   14.03
  -1  -9  -3  226.27    7.81
  -2  -9  -3    5.23    3.57
  -2  -9  -3    8.07    1.94
   2  -9   3    8.95    1.71
  -3  -9  -3   56.07    8.08
  -3  -9  -3   32.15    4.08
   3  -9   3   40.05    4.09
   3   9   3   28.79    6.10
  -4  -9  -3    9.68    2.66
   4  -9   3    8.29    2.58
  -4  -9  -3    3.94    3.50
   5  -9   3   -0.17    2.00
  -5  -9  -3   -1.97    1.64
  -4 -10   3   84.12    8.14
   4 -10  -3   88.01    7.48
   3 -10  -3    6.64    2.04
  -3 -10   3    6.68    2.42
  -3 -10   3    7.27    3.61
  -2 -10   3    9.46    3.80
  -2 -10   3    7.58    2.25
   2 -10  -3    9.03    1.93
  -1 -10   3    9.90    4.12
  -1 -10   3   12.42    2.17
   0 -10  -3  241.02   16.31
   0 -10   3  228.43   14.84
   1 -10   3   21.88    5.85
  -1 -10  -3   26.98    6.61
  -1 -10  -3   23.54    2.58
  -2 -10  -3  139.28   13.79
   2 -10   3  134.17    5.73
  -2 -10  -3  130.29    6.47
  -3 -10  -3   32.44    7.09
  -3 -10  -3   25.07    3.81
   3 -10   3   23.79    3.23
  -4 -10  -3   44.60    8.04
  -4 -10  -3   47.55    5.83
   4 -10   3   41.69    4.88
  -1 -11   3    3.69    3.39
   1 -11  -3    2.78    3.73
  -1 -11   3    1.30    1.88
   0 -11   3   -2.32    2.64
   0 -11  -3    1.75    3.62
   1 -11   3   13.34    5.42
  -1 -11  -3   21.48    2.53
  -1 -11  -3   14.95    5.34
  -9   0   4   -3.05    2.24
   9   0  -4    0.77    2.73
   8   0  -4    4.83    2.94
  -8   0   4    3.53    2.79
   7   0  -4   -1.32    1.66
  -7   0   4    2.91    2.23
   6   0  -4   13.31    3.47
  -6   0   4    5.59    2.53
   5   0  -4   -1.52    1.14
  -5   0   4   -1.61    1.15
   4   0  -4 2868.20   76.96
  -4   0   4 2967.24   76.93
   3   0  -4   -0.69    0.64
  -3   0   4   -0.96    0.69
   2   0  -4  513.72   15.93
  -2   0   4  520.30   16.11
  -1   0   4    0.84    0.69
   1   0  -4   -0.80    0.37
   0   0  -4  288.08    8.20
   0   0   4  253.51    8.91
   0   0   4  340.82    8.98
   0   0   4  280.94    8.17
   0   0  -4  297.10    9.09
   1   0   4   -0.45    0.45
   1   0   4   -1.01    0.41
  -1   0  -4   -1.31    0.39
  -1   0  -4    0.35    0.71
   1   0   4   -1.30    0.41
  -2   0  -4 8428.83  204.88
   2   0   4 8172.14  204.33
  -3   0  -4   -0.34    0.63
   3   0   4   -0.24    0.79
   4   0   4   65.27    4.75
  -4   0  -4   60.89    2.42
  -4   0  -4   66.35    4.57
   5   0   4   -0.67    1.06
  -5   0  -4   -0.81    0.93
  -5   0  -4    0.79    0.48
   6   0   4  688.03   24.25
  -6   0  -4  690.10   23.57
   7   0   4    1.79    2.08
  -7   0  -4    0.88    1.84
   8   0   4   11.27    3.72
  -8   0  -4   20.98    4.75
   9   0   4   -2.78    2.31
  -9   0  -4    1.39    2.75
   9  -1  -4   11.34    4.34
  -9  -1   4   12.24    4.36
   9   1  -4    4.35    3.74
   8  -1  -4    1.30    2.95
  -8  -1   4   -0.35    2.29
  -8   1   4   -1.30    2.37
   8   1  -4   -0.95    2.29
   7  -1  -4  121.89   11.16
  -7  -1   4  148.76   10.10
   7   1  -4  133.31    9.67
  -7   1   4  136.48    9.31
  -6  -1   4   -1.19    1.61
   6  -1  -4    2.78    2.19
   6   1  -4    0.19    1.84
  -6   1   4    5.34    2.49
  -5  -1   4   13.30    3.16
   5  -1  -4    9.87    2.70
   5   1  -4    9.46    2.74
  -5   1   4   15.61    3.17
  -4  -1   4   -0.56    1.09
   4  -1  -4    0.17    1.21
  -4   1   4   -0.52    0.81
   4   1  -4   -0.23    1.02
   3  -1  -4  966.16   27.81
  -3  -1   4  904.39   27.70
   3   1  -4  960.42   27.55
  -3   1   4  947.66   27.25
  -2  -1   4  350.89   15.02
   2  -1  -4  319.66   10.83
   2  -1  -4  286.71   10.67
   2   1  -4  303.35   10.53
  -2   1   4  301.91   10.44
   1  -1  -4    9.80    1.54
  -1  -1   4   12.04    1.71
  -1  -1   4    9.89    1.63
   1   1  -4   12.47    1.83
   1   1  -4    9.04    1.46
   0  -1   4  487.39   14.47
   0  -1   4  503.43   13.90
   0  -1  -4  497.19   14.19
   0  -1   4  500.14   12.45
   0  -1  -4  495.23   13.58
   0  -1   4  508.03   14.01
   0   1   4  491.18   14.10
   0   1  -4  513.57   14.50
   0   1  -4  502.99   13.75
   0   1   4  489.74   13.39
   0   1  -4  486.61   13.81
   2  -1   4 7991.94  195.52
  -2  -1  -4 8290.39  195.88
  -2  -1  -4 7884.33  194.85
   2  -1   4 7684.62  195.18
   2   1   4 8070.05  195.97
   2   1   4 7959.73  195.23
  -2   1  -4 7738.89  195.62
   2   1   4 7902.99  196.12
  -3  -1  -4  126.77    4.96
  -3  -1  -4  123.22    6.02
   3  -1   4  129.66    6.23
   3   1   4  142.21    6.46
  -3   1  -4  133.36    5.93
  -4  -1  -4 1027.66   30.09
   4  -1   4 1059.01   30.50
  -4  -1  -4  992.50   27.44
  -4   1  -4 1051.55   29.73
   4   1   4 1042.04   30.43
   5  -1   4    4.06    2.05
  -5  -1  -4    3.08    1.08
  -5  -1  -4    3.23    1.71
   5   1   4    5.45    2.20
  -5   1  -4    6.13    2.17
  -6  -1  -4    0.29    1.63
  -6  -1  -4    3.53    1.22
   6  -1   4    1.60    1.61
  -6   1  -4    3.23    1.98
   6   1   4    3.25    2.06
  -7  -1  -4   21.01    4.17
   7  -1   4   22.22    4.86
   7   1   4   12.83    3.76
  -7   1  -4   20.98    4.27
   8  -1   4   31.26    6.05
  -8  -1  -4   37.72    6.18
   8   1   4   41.20    6.80
  -8   1  -4   34.51    5.96
  -9  -1  -4   42.59    6.91
   9  -1   4   54.70    8.25
   9   1   4   54.94    8.17
  -9  -2   4    1.03    2.99
   9  -2  -4   -0.49    3.09
  -8  -2   4   38.53    6.66
   8  -2  -4   45.05    7.27
   8   2  -4   41.16    6.77
  -7  -2   4  814.98   29.40
   7  -2  -4  788.53   29.48
   7   2  -4  809.42   28.84
  -7   2   4  829.40   27.94
  -6  -2   4  714.32   25.78
   6  -2  -4  760.05   26.45
  -6   2   4  734.22   24.71
   6   2  -4  701.57   25.21
   5  -2  -4   63.28    6.79
  -5  -2   4   59.80    6.49
  -5   2   4   51.26    5.52
   5   2  -4   58.54    6.27
   4  -2  -4   12.91    2.93
  -4  -2   4   16.29    3.17
   4   2  -4   14.75    2.90
  -4   2   4   12.12    2.38
  -3  -2   4   34.92    4.09
   3  -2  -4   34.18    3.80
  -3   2   4   41.30    3.88
   3   2  -4   41.30    4.18
   3   2  -4   26.78    3.75
  -2  -2   4  531.98   16.67
   2  -2  -4  566.40   16.75
   2  -2  -4  508.08   16.38
   2   2  -4  541.15   16.12
   2   2  -4  536.25   16.05
  -2   2   4  549.86   15.81
   2   2  -4  551.70   17.97
  -1  -2   4  633.04   16.22
  -1  -2   4  591.88   17.13
  -1  -2   4  577.09   16.53
  -1  -2   4  579.49   18.10
   1  -2  -4  562.95   16.39
   1   2  -4  575.49   16.45
   1   2  -4  582.19   18.22
  -1   2   4  559.68   16.51
   0  -2   4 1374.34   34.73
   0  -2  -4 1341.44   34.33
   0  -2  -4 1385.04   35.19
   0  -2  -4 1411.23   35.57
   0  -2   4 1348.25   36.94
   0  -2   4 1378.78   34.82
   0  -2  -4 1396.44   34.86
   0   2  -4 1335.20   36.73
   0   2  -4 1341.97   34.15
   0   2  -4 1321.62   34.73
   0   2   4 1348.08   35.67
  -1  -2  -4 2119.57   56.62
   1  -2   4 2123.25   54.65
   1  -2   4 2143.99   54.66
  -1  -2  -4 2254.54   55.26
  -1  -2  -4 2201.89   54.68
  -1  -2  -4 2187.16   55.58
   1   2   4 2196.65   55.87
   1   2   4 2202.52   55.19
   2  -2   4 2609.81   64.18
  -2  -2  -4 2498.15   65.77
   2  -2   4 2580.76   65.48
  -2  -2  -4 2683.15   65.57
  -2  -2  -4 2549.27   65.59
   2  -2   4 2607.29   65.21
  -2  -2  -4 2606.04   66.53
  -2   2  -4 2526.73   64.92
   2   2   4 2532.86   68.61
   2   2   4 2591.02   65.82
   2   2   4 2615.09   66.00
  -3  -2  -4 1206.89   31.81
  -3  -2  -4 1142.07   32.27
   3  -2   4 1194.52   32.55
  -3   2  -4 1156.05   31.64
   3   2   4 1140.68   32.51
   4  -2   4   -0.46    1.15
  -4  -2  -4    0.22    0.86
  -4  -2  -4   -1.01    0.85
   4   2   4   -0.37    1.05
  -4   2  -4   -0.69    0.86
   5  -2   4    7.09    2.47
  -5  -2  -4    8.24    1.90
  -5  -2  -4    3.63    1.89
  -5   2  -4    5.59    1.94
   5   2   4    4.67    2.04
  -6  -2  -4   91.09    5.36
   6  -2   4   83.25    7.83
  -6  -2  -4  104.26    7.42
   6   2   4  111.56    7.69
  -6   2  -4   92.18    6.51
  -7  -2  -4  134.25    9.28
   7  -2   4  130.58    9.45
  -7   2  -4  141.31    8.87
   7   2   4  124.37    9.06
  -8  -2  -4  131.31   11.84
   8  -2   4  135.67   12.27
   8   2   4  103.83   10.62
  -9  -2  -4  117.29   11.77
   9  -2   4  113.56   12.23
   9  -3  -4    4.79    3.96
  -9  -3   4    6.32    3.68
  -8  -3   4   47.23    7.68
   8  -3  -4   30.24    6.07
   7  -3  -4  527.01   22.47
  -7  -3   4  518.04   22.13
   7   3  -4  568.87   21.79
  -6  -3   4    3.69    2.37
   6  -3  -4    4.01    2.52
   6   3  -4    1.25    2.12
   6   3  -4    1.87    2.02
  -6   3   4    3.84    1.49
  -6   3   4    4.32    2.16
  -5  -3   4  309.34   14.15
   5  -3  -4  325.52   14.31
   5   3  -4  318.68   13.40
  -5   3   4  330.36   11.37
   5   3  -4  322.89   15.61
  -5   3   4  328.03   12.68
  -4  -3   4  104.82    6.94
   4  -3  -4  107.71    6.80
  -4   3   4  103.85    5.29
  -4   3   4  112.85    5.87
   4   3  -4  104.90    6.23
   4   3  -4  124.38    8.24
  -3  -3   4  244.64   10.33
   3  -3  -4  248.19    9.94
   3  -3  -4  219.59    9.54
  -3   3   4  230.48    8.68
   3   3  -4  217.85   11.04
   3   3  -4  237.27    9.10
  -3   3   4  230.96    8.41
   2  -3  -4  218.83    8.28
   2  -3  -4  205.61    8.04
  -2  -3   4  205.50    9.55
  -2  -3   4  203.72    8.20
   2   3  -4  202.81    9.88
  -2   3   4  213.10    8.17
   2   3  -4  219.32    8.86
  -2   3   4  214.75    6.83
  -1  -3   4  775.94   24.60
   1  -3  -4  800.73   21.53
  -1  -3   4  799.30   22.42
  -1  -3   4  811.83   21.80
  -1  -3   4  800.56   22.40
   1   3  -4  802.67   20.32
   1   3  -4  781.38   24.66
  -1   3   4  797.10   22.90
   0  -3  -4 1561.80   42.41
   0  -3   4 1612.14   44.46
   0  -3   4 1595.56   40.60
   0  -3   4 1664.39   40.52
   0  -3  -4 1613.28   41.05
   0  -3  -4 1624.89   42.33
   0  -3  -4 1658.65   40.20
   0   3   4 1530.63   42.68
   0   3  -4 1594.29   44.09
   1  -3   4  207.26    6.50
  -1  -3  -4  182.64    8.68
   1  -3   4  191.76    6.50
  -1  -3  -4  204.37    7.09
  -1  -3  -4  198.89    7.69
  -1  -3  -4  207.47    6.65
  -1  -3  -4  193.52    7.96
   1   3   4  186.47    6.32
   1   3   4  184.21    7.66
   1   3   4  209.44    8.43
  -2  -3  -4 1894.17   48.30
   2  -3   4 1836.66   48.06
  -2  -3  -4 1866.24   50.34
  -2  -3  -4 1824.05   48.47
   2  -3   4 1915.11   47.83
  -2  -3  -4 1845.94   49.39
   2  -3   4 1862.80   48.02
   2   3   4 1881.44   49.85
   2   3   4 1870.25   49.75
  -2   3  -4 1857.63   47.34
  -3  -3  -4  456.31   15.43
  -3  -3  -4  502.11   16.00
   3  -3   4  479.16   13.60
   3  -3   4  472.47   15.12
   3  -3   4  479.74   15.50
   3   3   4  490.59   16.68
  -3   3  -4  463.56   14.46
   3   3   4  487.65   15.63
  -4  -3  -4  801.85   25.15
   4  -3   4  844.97   25.39
  -4  -3  -4  823.75   24.73
  -4   3  -4  795.88   23.87
   4   3   4  839.12   26.45
   4   3   4  827.15   25.18
  -5  -3  -4    3.31    1.63
   5  -3   4    2.23    1.67
  -5  -3  -4    1.12    1.47
   5   3   4    3.97    1.87
  -5   3  -4    0.41    1.12
  -6  -3  -4    5.56    2.71
   6  -3   4    1.48    1.98
  -6  -3  -4    4.80    1.94
   6   3   4    1.34    1.76
  -6   3  -4    5.99    2.34
  -7  -3  -4    2.73    2.49
   7  -3   4    0.63    2.17
   7   3   4    1.48    2.23
   8  -3   4   94.00   10.29
  -8  -3  -4   74.08    8.85
   9  -3   4    8.87    4.07
  -9  -3  -4    5.90    3.63
  -8  -4   4    9.04    3.99
   8  -4  -4    0.43    2.53
   7  -4  -4    5.31    3.06
  -7  -4   4    3.31    2.66
  -6  -4   4  369.52   16.70
   6  -4  -4  350.67   16.29
  -6   4   4  354.61   13.03
   6   4  -4  374.29   18.99
   6   4  -4  358.54   15.17
   5  -4  -4  384.40   15.92
  -5  -4   4  361.37   15.87
  -5   4   4  377.97   13.46
   5   4  -4  358.95   17.81
   5   4  -4  394.60   14.72
  -5   4   4  370.67   13.38
   4  -4  -4    5.98    2.05
  -4  -4   4    4.62    2.24
   4   4  -4    5.30    1.72
  -4   4   4    5.35    1.70
   4   4  -4    6.51    2.91
  -3  -4   4   29.45    3.94
  -3  -4   4   25.40    3.83
   3  -4  -4   27.88    3.62
   3  -4  -4   35.39    3.97
   3   4  -4   33.44    5.33
  -3   4   4   33.99    3.72
  -3   4   4   31.32    2.13
   2  -4  -4 1527.48   41.49
  -2  -4   4 1620.01   42.75
  -2  -4   4 1557.14   42.01
   2  -4  -4 1606.55   41.90
  -2  -4   4 1502.05   45.12
  -2   4   4 1595.75   42.97
   2   4  -4 1606.16   46.16
   2   4  -4 1568.85   39.82
  -1  -4   4  990.46   30.89
  -1  -4   4 1013.38   27.32
  -1  -4   4  990.47   28.49
  -1  -4   4  982.72   26.54
   1  -4  -4  979.81   28.21
   1  -4  -4  987.48   26.16
   1   4  -4 1009.03   30.99
  -1   4   4  992.62   28.93
   0  -4   4  692.02   18.65
   0  -4  -4  681.90   19.08
   0  -4  -4  721.32   21.61
   0  -4   4  684.85   23.45
   0  -4   4  720.54   18.56
   0  -4  -4  714.78   18.32
   0  -4  -4  713.89   21.71
   0   4   4  715.25   22.09
  -1  -4  -4   44.37    2.80
  -1  -4  -4   53.18    4.74
  -1  -4  -4   47.02    2.58
  -1  -4  -4   52.18    4.88
   1  -4   4   42.58    2.30
  -1  -4  -4   43.64    5.09
   1  -4   4   41.98    4.11
   1  -4   4   44.39    5.31
   1  -4   4   46.28    2.49
   1   4   4   48.12    4.44
   1   4   4   42.18    4.48
  -2  -4  -4    0.82    0.92
  -2  -4  -4    3.07    1.40
   2  -4   4   -0.72    0.57
   2  -4   4    0.74    0.84
   2  -4   4    0.76    0.70
  -2  -4  -4    1.01    1.44
  -2  -4  -4   -0.81    0.69
  -2  -4  -4    0.96    0.84
   2   4   4    2.31    1.38
   2   4   4    0.76    0.75
   3  -4   4  813.15   23.07
   3  -4   4  805.49   23.62
   3  -4   4  797.45   23.97
  -3  -4  -4  860.57   24.43
  -3  -4  -4  789.12   25.75
  -3  -4  -4  821.83   24.55
  -3  -4  -4  831.03   25.50
   3   4   4  871.94   26.69
  -3   4  -4  814.53   22.41
  -4  -4  -4  193.67    9.54
  -4  -4  -4  190.47    9.26
   4  -4   4  204.59    9.39
   4   4   4  230.44   11.32
   4   4   4  211.78    9.37
   5  -4   4   12.90    2.94
  -5  -4  -4   11.12    2.79
  -5  -4  -4   11.15    2.91
  -5   4  -4   13.37    2.56
   5   4   4   10.47    2.80
   5   4   4   16.07    3.79
  -6  -4  -4  161.51    8.95
   6  -4   4  160.18    9.76
  -6  -4  -4  177.90   10.09
   6   4   4  138.72   10.35
   6   4   4  158.46    9.47
   7  -4   4    1.24    2.22
  -7  -4  -4    2.52    2.54
   7   4   4    0.03    2.47
   8  -4   4   14.19    4.56
  -8  -4  -4   15.66    4.62
  -8  -5   4  447.85   21.16
   8  -5  -4  401.34   20.33
   7  -5  -4  366.07   17.97
  -7  -5   4  367.01   18.00
  -6  -5   4    5.31    2.99
   6  -5  -4    0.96    2.09
  -6   5   4    5.17    2.09
  -5  -5   4  201.16   11.08
   5  -5  -4  217.50   11.19
  -5   5   4  194.38    9.36
   5   5  -4  187.10   12.94
  -4  -5   4   20.82    3.89
   4  -5  -4   23.84    3.90
   4  -5  -4   20.18    3.74
   4   5  -4    8.87    1.96
  -4   5   4   26.20    3.78
   4   5  -4   22.57    4.83
   3  -5  -4    5.36    1.67
  -3  -5   4   14.70    3.60
  -3  -5   4    8.83    2.30
   3  -5  -4    9.20    2.25
  -3  -5   4   10.56    2.58
   3   5  -4    9.44    1.54
  -3   5   4   10.52    2.51
   3   5  -4    7.42    2.70
  -2  -5   4  158.24    9.53
   2  -5  -4  140.78    6.30
  -2  -5   4  154.74    6.87
   2  -5  -4  154.50    6.68
  -2  -5   4  149.69    7.71
  -2   5   4  151.32    7.98
   2   5  -4  158.41    9.82
  -1  -5   4  835.45   22.89
   1  -5  -4  822.70   24.75
  -1  -5   4  763.66   27.09
   1  -5  -4  815.71   21.58
  -1  -5   4  794.70   22.02
  -1  -5   4  804.39   25.06
   1  -5  -4  784.84   25.48
   1   5  -4  797.37   27.16
  -1   5   4  801.42   25.40
   0  -5   4   19.68    1.76
   0  -5   4   26.93    4.59
   0  -5   4   23.16    3.95
   0  -5  -4   19.80    3.30
   0  -5  -4   20.61    2.06
   0  -5  -4   20.78    1.41
   0  -5  -4   20.30    3.43
   0  -5   4   28.92    1.73
   0   5   4   17.38    3.37
   1  -5   4  515.02   17.42
  -1  -5  -4  477.14   14.50
  -1  -5  -4  487.40   18.86
   1  -5   4  505.48   13.62
   1  -5   4  503.71   13.86
  -1  -5  -4  484.96   17.38
  -1  -5  -4  489.41   17.61
   1  -5   4  509.49   19.48
  -1  -5  -4  482.98   14.00
   1   5   4  493.61   17.37
   1   5   4  500.47   18.03
  -2  -5  -4    4.07    1.25
   2  -5   4    5.97    1.84
  -2  -5  -4    7.55    2.08
  -2  -5  -4    6.99    1.65
  -2  -5  -4    5.47    2.42
   2  -5   4    3.83    1.09
  -2  -5  -4    6.13    2.17
   2  -5   4    5.80    1.31
   2   5   4    6.53    2.24
   3  -5   4   86.27    4.81
   3  -5   4   89.80    5.15
  -3  -5  -4   98.90    6.90
   3  -5   4   80.34    4.98
  -3  -5  -4   85.67    5.35
  -3  -5  -4   85.60    5.21
  -3  -5  -4   81.57    7.27
   3   5   4   86.81    4.55
   3   5   4   82.86    7.69
  -4  -5  -4   38.16    5.15
   4  -5   4   39.62    4.53
  -4  -5  -4   26.65    3.84
   4  -5   4   30.16    4.08
   4   5   4   33.30    5.41
   5  -5   4  135.47    8.19
  -5  -5  -4  128.05    8.09
   5   5   4  136.16    9.86
  -6  -5  -4  111.68    8.12
   6  -5   4   93.95    8.58
   6   5   4  103.11   10.67
  -7  -5  -4   14.09    4.11
   7  -5   4   14.98    4.08
   8  -5   4  101.81   10.83
  -8  -5  -4  100.84   10.39
   8  -6  -4   77.18    9.92
  -8  -6   4   60.34    8.58
   7  -6  -4   52.86    7.70
  -7  -6   4   46.37    7.25
   6  -6  -4    2.45    2.31
  -6  -6   4    2.66    2.65
  -5  -6   4    2.53    1.98
   5  -6  -4    0.23    1.79
   5   6  -4    9.57    3.91
  -5   6   4    1.60    1.74
   4  -6  -4  163.73    8.97
  -4  -6   4  175.01    9.72
  -4   6   4  173.94    9.45
   4   6  -4  169.39   12.12
   3  -6  -4  202.61    9.03
  -3  -6   4  200.10    9.48
   3  -6  -4  190.80    8.80
  -3  -6   4  195.39    9.66
  -3  -6   4  209.91   12.05
  -3   6   4  193.92   10.14
   3   6  -4  193.81   12.48
  -2  -6   4  164.00    8.84
   2  -6  -4  169.95    7.01
  -2  -6   4  166.40    7.43
  -2  -6   4  163.48   10.53
   2  -6  -4  156.76    6.98
  -2   6   4  165.71    9.26
   2   6  -4  167.97   10.89
  -1  -6   4  195.54   10.64
   1  -6  -4  184.05    9.45
  -1  -6   4  196.72    7.82
  -1  -6   4  192.44    7.19
   1  -6  -4  193.14   10.47
  -1  -6   4  193.27   10.00
   1  -6  -4  206.21    6.84
  -1  -6   4  211.76   12.04
  -1   6   4  204.64   10.52
   1   6  -4  200.39   11.43
   0  -6   4    8.52    2.71
   0  -6  -4    8.34    1.42
   0  -6  -4    9.93    2.77
   0  -6   4    6.82    1.13
   0  -6   4   10.79    3.22
   0  -6  -4    3.81    1.81
   0  -6   4    9.25    1.29
   0   6   4    8.28    2.75
  -1  -6  -4 1034.33   28.27
  -1  -6  -4 1011.18   34.21
  -1  -6  -4 1092.67   27.85
   1  -6   4 1062.76   27.47
  -1  -6  -4 1060.91   33.17
  -1  -6  -4 1051.55   32.66
   1  -6   4 1052.14   35.33
   1  -6   4 1021.20   32.16
   1  -6   4 1074.33   27.25
  -2  -6  -4    7.36    2.54
  -2  -6  -4   10.87    3.28
  -2  -6  -4    8.67    3.05
  -2  -6  -4    7.22    1.67
   2  -6   4    5.41    2.84
  -2  -6  -4    6.10    1.60
   2  -6   4    5.51    1.36
   2  -6   4    7.10    2.18
   2  -6   4    7.64    1.54
   2   6   4    3.88    2.11
  -3  -6  -4   54.02    6.80
   3  -6   4   54.74    3.84
   3  -6   4   53.44    4.61
  -3  -6  -4   43.29    4.71
   3  -6   4   62.36    5.80
  -3  -6  -4   52.59    4.93
   3   6   4   57.99    7.09
  -4  -6  -4  108.46    8.04
  -4  -6  -4   87.36    6.20
   4  -6   4   93.91    6.08
   4   6   4   92.24    9.67
  -5  -6  -4  392.16   15.71
   5  -6   4  375.47   15.43
   5   6   4  367.58   18.52
   6  -6   4  169.71   10.31
  -6  -6  -4  166.98   10.32
   6   6   4  175.69   12.92
   7  -6   4   49.38    6.85
  -7  -6  -4   36.06    6.04
   8  -6   4    8.33    3.80
  -8  -6  -4    7.63    3.55
  -7  -7   4   69.94    8.83
   7  -7  -4   90.33   10.25
   6  -7  -4   -2.78    1.96
  -6  -7   4    1.43    2.17
   5  -7  -4   24.02    4.53
  -5  -7   4   35.98    5.73
  -5   7   4   18.13    4.08
  -4  -7   4   -0.38    1.38
   4  -7  -4    0.36    1.46
   4   7  -4   -2.00    2.00
  -4   7   4    1.05    1.37
  -3  -7   4  172.04    9.14
   3  -7  -4  179.63    8.55
  -3  -7   4  191.08   12.34
  -3  -7   4  187.27   10.23
   3   7  -4  187.94   12.83
  -3   7   4  182.25   10.46
  -2  -7   4    6.47    3.11
  -2  -7   4    8.65    2.09
   2  -7  -4    5.16    2.79
   2  -7  -4    9.72    2.01
  -2  -7   4    6.21    2.60
   2  -7  -4    6.23    1.72
   2   7  -4    9.14    3.38
  -2   7   4    6.53    2.80
  -1  -7   4  199.70    7.66
  -1  -7   4  210.07   11.23
   1  -7  -4  225.48   12.30
  -1  -7   4  201.58   12.84
   1  -7  -4  208.95    7.25
  -1   7   4  207.77   11.50
   0  -7  -4 1419.00   43.83
   0  -7   4 1311.63   42.61
   0  -7  -4 1474.35   36.05
   0  -7   4 1439.77   36.62
   0  -7   4 1484.95   46.47
   0  -7   4 1376.23   36.40
   0  -7  -4 1426.50   37.00
  -1  -7  -4  182.84    6.60
   1  -7   4  182.77    6.02
   1  -7   4  171.70    6.15
   1  -7   4  179.83   11.19
  -1  -7  -4  176.26    6.85
   1  -7   4  171.75   11.96
  -1  -7  -4  187.60   11.84
  -1  -7  -4  189.29   11.10
  -2  -7  -4  181.30    7.38
   2  -7   4  184.97   12.45
   2  -7   4  167.14    9.63
  -2  -7  -4  158.77   10.08
   2  -7   4  173.50    6.55
  -2  -7  -4  186.94   11.55
   2  -7   4  168.77    6.70
  -2  -7  -4  182.36    8.22
   2   7   4  186.43   10.92
   3  -7   4    1.31    1.48
  -3  -7  -4   -1.94    1.71
  -3  -7  -4   -1.50    1.03
   3  -7   4   -0.75    0.99
   3   7   4    1.28    2.07
  -4  -7  -4    9.02    2.40
   4  -7   4    3.06    1.85
  -4  -7  -4    8.71    3.30
   4  -7   4    4.29    1.85
   4   7   4    6.21    2.96
  -5  -7  -4    1.97    1.98
   5  -7   4    3.14    1.98
   5   7   4    4.83    3.15
   6  -7   4  130.87    9.07
  -6  -7  -4  119.83    8.79
  -7  -7  -4   16.60    4.51
   7  -7   4   15.95    4.26
   6  -8  -4   52.31    7.28
  -6  -8   4   57.84    8.02
   5  -8  -4   14.37    3.51
  -5  -8   4   10.50    3.66
  -4  -8   4   97.60    8.70
   4  -8  -4  102.11    7.02
  -3  -8   4  112.90    7.33
  -3  -8   4  122.93    8.72
   3  -8  -4  125.31    7.04
  -2  -8   4    7.32    2.82
  -2  -8   4    8.32    2.45
   2  -8  -4    9.60    2.08
   2  -8  -4    5.85    2.94
   2   8  -4   12.18    4.19
  -1  -8   4    5.74    2.78
   1  -8  -4    2.62    2.56
   1  -8  -4    2.99    1.12
   0  -8   4  275.04    8.90
   0  -8  -4  270.55    8.18
   0  -8   4  259.06   13.94
   0  -8   4  248.85    8.46
   0  -8  -4  255.48   14.40
   0  -8  -4  252.17    8.74
  -1  -8  -4 1004.44   36.98
   1  -8   4 1056.59   27.84
   1  -8   4 1062.34   27.87
  -1  -8  -4 1091.09   28.59
  -1  -8  -4 1110.02   36.62
   2  -8   4  310.19   10.19
  -2  -8  -4  314.98   16.44
  -2  -8  -4  285.82   10.67
  -2  -8  -4  301.63   15.47
  -3  -8  -4   46.11    4.75
   3  -8   4   46.69    4.40
  -3  -8  -4   55.88    7.59
   3   8   4   56.11    7.77
   4  -8   4   64.05    5.96
  -4  -8  -4   60.16    6.15
  -4  -8  -4   57.13    7.76
   4   8   4   58.42    8.54
  -5  -8  -4   28.15    4.86
   5  -8   4   25.34    4.26
   6  -8   4   75.94    8.23
  -6  -8  -4   75.02    8.46
   5  -9  -4    7.60    3.21
  -5  -9   4   12.55    3.83
  -4  -9   4   20.65    4.37
   4  -9  -4   15.55    3.47
   3  -9  -4  106.32    6.42
  -3  -9   4   96.04    6.84
  -3  -9   4  119.77   10.88
   2  -9  -4   43.40    4.06
  -2  -9   4   35.79    4.34
  -2  -9   4   37.21    6.10
  -1  -9   4   14.44    4.22
   1  -9  -4   11.77    1.92
   0  -9   4  373.79   18.50
   0  -9  -4  363.54   19.68
   0  -9  -4  370.91   11.33
   0  -9  -4  366.33   18.86
   0  -9   4  402.04   12.24
  -1  -9  -4   21.32    2.44
   1  -9   4   18.37    2.15
  -1  -9  -4   20.48    5.13
  -1  -9  -4   23.12    5.87
  -2  -9  -4   54.06    8.40
  -2  -9  -4   59.18    4.15
   2  -9   4   61.26    3.70
  -3  -9  -4   93.64    6.05
   3  -9   4   77.44    5.14
  -3  -9  -4   88.04    9.99
   3   9   4  100.58   11.13
   4  -9   4   60.22    5.90
  -4  -9  -4   60.68    6.23
  -4  -9  -4   82.79   10.03
   5  -9   4   80.43    7.78
  -5  -9  -4   86.09    8.47
   4 -10  -4   79.36    7.34
  -4 -10   4   79.77    7.93
   3 -10  -4  137.08    7.41
  -3 -10   4  126.80    7.90
  -3 -10   4  126.07   11.66
  -2 -10   4   13.31    2.83
  -2 -10   4    8.77    3.63
   2 -10  -4    9.81    2.20
  -1 -10   4   13.92    4.51
  -1 -10   4   16.46    2.63
   1 -10  -4   10.77    1.88
   0 -10   4  190.07   13.33
   0 -10  -4  197.98   14.96
   0 -10  -4  208.62    7.32
  -1 -10  -4  179.77   16.69
   1 -10   4  159.46   14.42
  -1 -10  -4  142.71    6.19
   2 -10   4   85.90    4.72
  -2 -10  -4   77.70   10.81
  -2 -10  -4   92.83    5.37
  -3 -10  -4    9.15    4.72
  -3 -10  -4    9.74    2.75
   3 -10   4    6.58    2.15
   4 -10   4  222.07   10.59
  -4 -10  -4  260.74   16.04
  -4 -10  -4  240.37   11.54
   1 -11  -4   13.97    5.71
  -1 -11   4   16.43    5.35
  -1 -11   4   16.75    2.50
   0 -11   4    6.66    4.00
   0 -11  -4    5.46    4.40
   1 -11   4   33.45    7.47
  -1 -11  -4   41.08    3.66
  -1 -11  -4   30.72    7.53
  -9   0   5    4.29    3.39
   9   0  -5    5.63    3.82
   8   0  -5    4.49    3.03
  -8   0   5   -0.10    2.36
  -7   0   5  122.12   10.80
   7   0  -5  113.19   10.44
  -6   0   5    0.97    1.84
   6   0  -5   -0.62    1.52
  -5   0   5 2036.23   56.59
   5   0  -5 2008.10   56.78
  -4   0   5   -0.88    1.00
   4   0  -5   -0.58    1.20
  -3   0   5    1.67    1.51
   3   0  -5    4.63    1.86
  -2   0   5   -0.52    0.73
   2   0  -5   -0.29    0.70
  -1   0   5  342.56   11.60
   1   0  -5  370.11   12.19
   0   0  -5   -0.30    0.32
   0   0  -5    0.26    0.56
   0   0   5    0.07    0.64
   0   0   5    0.17    0.35
   0   0   5   -0.49    0.45
   0   0  -5   -0.37    0.53
  -1   0  -5 1899.19   49.68
  -1   0  -5 1923.13   49.97
   1   0   5 1971.35   50.19
   1   0   5 2026.74   49.72
   1   0   5 1989.73   49.24
  -2   0  -5   17.97    2.25
  -3   0  -5 1679.77   44.59
   4   0   5    1.42    1.26
  -4   0  -5   -0.79    0.83
  -5   0  -5  149.80    8.14
   5   0   5  172.71    8.99
  -6   0  -5    3.38    1.97
   6   0   5    0.42    1.59
   7   0   5  478.97   20.09
  -7   0  -5  488.29   19.48
  -8   0  -5    0.32    2.07
   8   0   5    2.79    2.77
   9   0   5   13.89    4.79
  -9   0  -5   22.27    5.54
   9  -1  -5   49.12    8.12
  -9  -1   5   61.20    8.99
   9   1  -5   39.29    7.29
   8  -1  -5   82.25    9.72
  -8  -1   5  102.41   10.88
   8   1  -5  102.33   10.47
  -8   1   5  102.56   10.17
   7  -1  -5  193.13   12.14
  -7  -1   5  200.94   12.02
  -7   1   5  190.64   11.28
   7   1  -5  186.12   11.68
   6  -1  -5   66.77    7.52
  -6  -1   5   65.38    7.31
  -6   1   5   67.93    7.34
   6   1  -5   63.08    7.35
   5  -1  -5  261.99   12.31
  -5  -1   5  227.81   11.60
  -5   1   5  266.53   11.92
   5   1  -5  260.28   12.10
   4  -1  -5  642.31   21.17
  -4  -1   5  597.40   20.89
  -4   1   5  623.57   20.48
   4   1  -5  615.92   20.67
   3  -1  -5   32.39    3.92
  -3  -1   5   48.53    5.05
  -3   1   5   43.55    4.38
   3   1  -5   54.99    5.15
   2  -1  -5 3284.76   82.70
   2   1  -5 3163.33   82.72
  -2   1   5 3327.17   82.51
   2   1  -5 3188.68   82.35
  -1  -1   5  269.20    9.56
  -1  -1   5  255.04    9.12
   1  -1  -5  259.61    9.00
  -1  -1   5  261.89    9.09
   1   1  -5  285.66    9.57
   1   1  -5  260.27    8.94
   0  -1   5  783.44   21.52
   0  -1  -5  786.71   20.78
   0  -1   5  753.31   20.98
   0  -1   5  800.14   21.28
   0  -1  -5  770.00   21.41
   0   1   5  765.95   21.37
   0   1  -5  748.95   20.91
   0   1  -5  765.48   21.38
  -1  -1  -5   72.52    3.35
  -1  -1  -5   74.13    3.74
   1  -1   5   78.16    3.46
  -1  -1  -5   63.11    3.49
   1  -1   5   69.08    3.46
   1   1   5   66.39    3.15
   1   1   5   67.55    3.70
   1   1   5   67.09    3.80
  -1   1  -5   75.07    3.49
   2  -1   5 8410.16  214.24
   2  -1   5 8770.41  215.35
  -2  -1  -5 8807.28  214.65
   2   1   5 8602.94  215.55
  -2   1  -5 9003.15  215.07
   2   1   5 8734.50  215.34
   3  -1   5   32.61    3.54
  -3  -1  -5   33.73    2.20
  -3  -1  -5   32.92    3.53
   3   1   5   34.47    3.71
  -3   1  -5   32.50    3.22
  -4  -1  -5  216.24    9.43
  -4  -1  -5  212.03    7.40
   4  -1   5  211.38    9.59
   4   1   5  240.05   10.03
  -4   1  -5  229.70    9.34
  -5  -1  -5   77.21    6.67
   5  -1   5   74.97    6.91
  -5  -1  -5   71.09    3.64
  -5   1  -5   62.28    5.75
   5   1   5   75.52    6.85
  -6  -1  -5    7.80    1.53
  -6  -1  -5    4.53    2.21
   6  -1   5    6.30    2.52
  -6   1  -5    8.73    2.68
   6   1   5    4.52    2.17
  -7  -1  -5    7.06    2.82
   7  -1   5    7.01    2.96
  -7   1  -5   11.61    3.42
   7   1   5    5.16    2.68
  -8  -1  -5  175.73   11.44
   8   1   5  189.27   12.22
  -8   1  -5  174.85   11.05
  -9  -1  -5    7.40    3.41
   9  -1   5   15.78    4.91
   9   1   5    9.74    4.18
   9  -2  -5    3.89    3.70
  -9  -2   5    3.59    3.24
  -8  -2   5    1.01    2.46
   8  -2  -5    5.70    3.54
   8   2  -5    4.63    2.90
  -7  -2   5  288.78   15.18
   7  -2  -5  304.10   15.79
   7   2  -5  288.17   14.89
  -7   2   5  302.59   14.32
   6  -2  -5  107.12    9.76
  -6  -2   5  100.12    9.61
   6   2  -5  109.78    8.01
  -6   2   5  106.09    7.49
   5  -2  -5  489.85   18.79
  -5  -2   5  502.93   18.97
   5   2  -5  469.59   18.02
  -5   2   5  475.44   17.54
  -4  -2   5  261.08   11.77
   4  -2  -5  259.84   11.57
   4   2  -5  260.58   12.19
   4   2  -5  259.92   11.17
  -4   2   5  260.29   10.73
  -3  -2   5   -0.54    0.96
   3  -2  -5    0.87    1.16
   3   2  -5   -0.19    0.82
  -3   2   5    0.91    1.07
   3   2  -5    0.05    1.12
   2  -2  -5   44.65    4.06
  -2  -2   5   39.60    3.94
   2   2  -5   44.21    4.42
  -2   2   5   50.06    3.23
   2   2  -5   42.20    3.15
  -1  -2   5 1371.75   36.93
   1  -2  -5 1420.57   36.85
  -1  -2   5 1382.35   38.43
  -1  -2   5 1427.21   37.63
   1   2  -5 1410.35   38.67
   1   2  -5 1413.39   36.26
   1   2  -5 1398.21   36.44
   0  -2   5    0.09    0.47
   0  -2  -5    1.01    0.73
   0  -2   5   -0.44    0.64
   0  -2  -5    0.45    0.46
   0  -2  -5   -0.22    0.37
   0  -2   5    0.45    0.55
   0   2  -5    0.84    0.83
   0   2   5    1.43    0.72
   0   2   5    0.12    0.26
   0   2  -5    0.04    0.24
  -1  -2  -5  403.59   12.58
  -1  -2  -5  414.89   12.58
  -1  -2  -5  409.04   12.00
  -1  -2  -5  415.23   13.70
   1  -2   5  416.00   12.16
   1  -2   5  411.94   12.11
   1   2   5  411.79   11.97
   1   2   5  412.21   12.66
   1   2   5  411.39   12.84
   2  -2   5 1040.67   27.95
  -2  -2  -5 1019.80   29.06
   2  -2   5 1045.66   28.25
  -2  -2  -5  970.85   27.97
  -2  -2  -5 1041.81   28.15
  -2  -2  -5 1053.75   28.56
  -2   2  -5 1005.68   27.79
   2   2   5 1097.53   28.83
   2   2   5 1066.78   28.59
  -3  -2  -5  444.09   13.64
   3  -2   5  417.66   14.28
  -3  -2  -5  453.42   14.40
   3  -2   5  430.02   11.20
  -3   2  -5  440.57   13.79
   3   2   5  399.39   14.27
  -4  -2  -5  656.39   19.48
  -4  -2  -5  662.94   21.07
   4   2   5  668.52   21.32
  -4   2  -5  650.18   20.28
   5  -2   5  332.73   13.77
  -5  -2  -5  332.22   11.53
  -5  -2  -5  341.60   13.68
  -5   2  -5  327.15   12.83
   5   2   5  312.56   13.42
  -6  -2  -5  120.34    8.08
  -6  -2  -5  119.37    6.04
   6  -2   5  135.58    8.69
  -6   2  -5  113.81    7.36
   6   2   5  112.12    7.97
  -7  -2  -5  573.53   22.14
   7  -2   5  557.92   22.46
   7   2   5  582.12   22.50
  -7   2  -5  570.21   21.23
   8  -2   5   24.95    5.25
  -8  -2  -5   24.48    5.09
   8   2   5   30.46    5.74
   9  -2   5    1.64    2.81
  -9  -2  -5    2.82    3.00
  -9  -3   5  101.58   11.50
   9  -3  -5  110.67   12.66
  -8  -3   5  163.73   14.26
   8  -3  -5  149.80   13.40
  -7  -3   5  608.18   24.39
   7  -3  -5  595.86   24.32
   7   3  -5  598.04   23.17
   6  -3  -5   10.30    3.41
  -6  -3   5   10.35    3.24
  -6   3   5   16.52    3.43
   6   3  -5   14.97    4.60
   6   3  -5   15.30    3.69
   5  -3  -5  573.15   21.96
  -5  -3   5  603.50   22.46
   5   3  -5  632.07   21.48
  -5   3   5  647.77   20.71
   5   3  -5  636.03   24.20
   4  -3  -5  368.50   14.44
  -4  -3   5  370.05   14.77
   4   3  -5  339.26   15.63
   4   3  -5  341.09   13.32
  -4   3   5  363.50   12.85
  -3  -3   5    8.17    2.25
   3  -3  -5    6.73    1.94
   3  -3  -5    4.84    1.82
  -3   3   5    6.19    1.52
  -3   3   5    5.39    1.38
   3   3  -5    5.43    1.54
   3   3  -5    5.52    2.17
   2  -3  -5   44.38    4.15
   2  -3  -5   44.52    4.10
  -2  -3   5   47.34    4.92
  -2  -3   5   51.75    3.72
   2   3  -5   38.79    2.85
   2   3  -5   47.86    3.65
   2   3  -5   40.05    4.89
  -2   3   5   50.44    3.49
   1  -3  -5   18.25    2.12
  -1  -3   5   18.49    3.03
  -1  -3   5   17.18    2.21
  -1  -3   5   18.49    2.16
  -1  -3   5   21.08    2.65
  -1   3   5   18.47    1.18
   1   3  -5   15.76    2.77
  -1   3   5   25.32    2.96
   1   3  -5   22.19    1.84
   0  -3   5   65.80    3.31
   0  -3  -5   72.43    3.85
   0  -3  -5   63.51    3.85
   0  -3   5   74.06    3.38
   0  -3  -5   67.25    3.59
   0  -3  -5   68.84    3.01
   0  -3   5   70.09    5.07
   0   3   5   68.51    4.24
   0   3  -5   62.74    4.65
  -1  -3  -5 1066.64   30.89
   1  -3   5 1145.34   29.37
   1  -3   5 1107.53   29.47
  -1  -3  -5 1121.19   32.58
  -1  -3  -5 1145.55   30.20
  -1  -3  -5 1137.53   30.29
  -1  -3  -5 1148.63   29.42
   1   3   5 1111.92   31.43
  -1   3  -5 1123.39   28.31
   1   3   5 1115.96   30.51
   1   3   5 1118.14   29.56
   2  -3   5  146.46    6.05
  -2  -3  -5  143.10    6.30
  -2  -3  -5  145.97    7.43
   2  -3   5  147.27    5.89
  -2  -3  -5  144.30    6.71
   2  -3   5  145.68    5.97
  -2  -3  -5  152.78    6.18
   2   3   5  138.03    6.66
   2   3   5  152.16    7.15
   2   3   5  144.64    6.34
  -3  -3  -5    1.44    1.22
   3  -3   5    4.11    0.97
   3  -3   5    1.83    1.15
  -3  -3  -5    0.70    1.16
  -3  -3  -5    0.44    0.99
  -3   3  -5    0.68    0.70
   3   3   5   -0.15    0.89
   3   3   5   -0.43    0.88
  -4  -3  -5   11.38    2.36
  -4  -3  -5    9.75    2.49
   4  -3   5   16.63    2.99
  -4   3  -5   16.70    2.63
   4   3   5   13.47    2.79
   4   3   5   14.05    2.98
  -5  -3  -5   66.30    4.77
  -5  -3  -5   63.30    6.18
   5  -3   5   62.28    6.28
   5   3   5   62.26    6.25
  -5   3  -5   68.75    4.87
  -6  -3  -5    4.91    2.29
  -6  -3  -5    3.09    1.80
   6  -3   5    2.92    2.15
   6   3   5    3.69    2.36
  -6   3  -5    3.38    1.98
   7  -3   5   24.04    5.00
  -7  -3  -5   29.89    5.21
   7   3   5   32.85    5.69
  -8  -3  -5   50.51    7.20
   8  -3   5   54.46    7.75
  -9  -3  -5   85.62    9.98
   9  -3   5   85.14   10.53
  -8  -4   5  107.76   11.71
   8  -4  -5   98.77   10.83
   7  -4  -5   11.63    4.13
  -7  -4   5   12.31    4.19
   6  -4  -5   66.61    7.93
  -6  -4   5   71.78    8.38
   6   4  -5   66.19    6.95
  -6   4   5   72.19    5.10
   6   4  -5   75.60    9.43
   5  -4  -5  198.54   10.53
  -5  -4   5  161.01   10.02
  -5   4   5  190.65    8.53
   5   4  -5  176.06    9.08
  -5   4   5  171.08    8.22
   5   4  -5  169.28   11.68
  -4  -4   5   29.46    4.35
   4  -4  -5   33.99    4.59
   4   4  -5   37.35    4.09
  -4   4   5   46.23    4.51
   4   4  -5   27.41    5.03
  -3  -4   5  208.22    9.67
   3  -4  -5  211.75    9.47
  -3  -4   5  201.12    9.86
   3  -4  -5  218.67    9.57
   3   4  -5  239.42   12.23
  -3   4   5  221.97    9.27
  -3   4   5  222.49    7.43
  -2  -4   5  728.57   21.40
  -2  -4   5  683.68   23.91
   2  -4  -5  723.63   21.17
   2  -4  -5  683.11   20.87
  -2  -4   5  685.11   21.19
   2   4  -5  704.69   19.13
   2   4  -5  733.33   24.86
  -2   4   5  725.41   21.93
  -1  -4   5 2949.97   75.28
   1  -4  -5 3099.58   75.04
  -1  -4   5 2964.10   76.08
  -1  -4   5 2909.63   79.78
  -1  -4   5 3018.76   76.65
   1   4  -5 2893.35   79.70
  -1   4   5 3045.97   77.61
   0  -4   5 1143.29   29.87
   0  -4   5 1089.40   34.33
   0  -4  -5 1138.06   32.09
   0  -4   5 1136.92   29.73
   0  -4  -5 1143.57   32.20
   0  -4  -5 1186.40   30.45
   0  -4  -5 1134.71   29.27
   0   4   5 1118.03   32.72
  -1  -4  -5 1026.92   29.98
  -1  -4  -5 1062.11   27.39
  -1  -4  -5 1060.68   28.21
  -1  -4  -5  954.93   31.26
  -1  -4  -5 1020.03   29.44
   1  -4   5  996.94   31.84
   1  -4   5 1037.39   27.18
   1  -4   5 1069.96   27.52
   1   4   5 1086.05   30.84
   1   4   5 1034.09   29.52
  -2  -4  -5    6.28    1.46
  -2  -4  -5    6.40    1.94
   2  -4   5    8.68    1.53
   2  -4   5    8.29    1.60
  -2  -4  -5    7.44    2.19
  -2  -4  -5   10.72    2.03
   2  -4   5   14.92    2.36
   2   4   5    8.44    1.66
   2   4   5    9.41    2.40
   2   4   5    9.13    2.19
  -3  -4  -5   11.48    2.43
  -3  -4  -5   13.86    2.85
   3  -4   5   17.53    2.38
  -3  -4  -5   15.20    2.86
   3  -4   5   12.54    2.19
  -3  -4  -5   13.67    2.45
   3  -4   5   17.15    2.61
   3   4   5    8.37    2.00
  -3   4  -5   15.75    2.17
   3   4   5   16.06    3.14
  -4  -4  -5  328.68   13.06
   4  -4   5  325.06   12.74
  -4  -4  -5  323.31   12.79
   4   4   5  328.67   12.79
   4   4   5  324.31   14.25
  -5  -4  -5   26.69    3.94
   5  -4   5   27.67    4.29
  -5  -4  -5   24.80    3.94
  -5   4  -5   33.20    3.95
   5   4   5   22.58    4.00
   5   4   5   23.93    4.56
  -6  -4  -5   59.34    6.80
   6  -4   5   52.60    6.41
  -6  -4  -5   58.11    6.15
   6   4   5   67.16    8.06
   6   4   5   63.40    6.96
   7  -4   5  160.15   10.65
  -7  -4  -5  156.76   10.42
   7   4   5  154.36   13.77
   8  -4   5   46.50    7.20
  -8  -4  -5   58.56    7.90
  -8  -5   5  342.32   18.45
   8  -5  -5  345.18   18.59
   7  -5  -5   83.74    9.57
  -7  -5   5   88.44   10.00
  -6  -5   5   89.45    9.43
   6  -5  -5   76.32    8.38
  -6   5   5   73.95    6.53
   5  -5  -5  315.90   14.22
  -5  -5   5  297.89   14.39
  -5   5   5  305.49   12.55
   5   5  -5  275.28   16.32
  -4  -5   5  145.88    8.93
   4  -5  -5  137.86   13.54
   4  -5  -5  167.34    9.04
   4   5  -5  178.61   11.80
  -4   5   5  176.67    8.71
   3  -5  -5   83.18    5.54
  -3  -5   5  100.50    9.15
   3  -5  -5   78.41    5.39
  -3  -5   5   84.83    5.80
  -3  -5   5   84.48    6.04
   3   5  -5   82.53    3.96
  -3   5   5   97.61    6.18
   3   5  -5   71.50    8.03
   2  -5  -5   34.15    3.59
  -2  -5   5   32.29    3.88
  -2  -5   5   22.93    4.29
  -2  -5   5   29.59    3.50
   2  -5  -5   32.89    3.45
   2   5  -5   32.03    5.17
  -2   5   5   36.03    4.48
   1  -5  -5   83.49    5.81
  -1  -5   5   81.22    4.19
  -1  -5   5   85.51    4.76
  -1  -5   5   84.06    8.05
   1  -5  -5   79.87    3.93
   1  -5  -5   76.60    5.20
  -1  -5   5   81.88    5.42
   1   5  -5   82.58    8.07
  -1   5   5   77.33    5.66
   0  -5   5 2039.72   51.81
   0  -5  -5 2079.23   51.26
   0  -5  -5 2014.53   55.35
   0  -5   5 2052.55   51.74
   0  -5  -5 2054.96   55.66
   0  -5   5 2074.02   58.53
   0  -5  -5 1952.25   52.30
   0   5   5 2085.56   56.34
  -1  -5  -5  245.97    7.98
  -1  -5  -5  238.29   10.63
  -1  -5  -5  233.11   10.49
   1  -5   5  245.98    7.97
   1  -5   5  232.21   12.18
  -1  -5  -5  252.29   12.15
   1  -5   5  240.69    7.69
  -1  -5  -5  239.51    8.58
   1  -5   5  224.89   10.29
   1   5   5  239.13   10.41
   1   5   5  229.82   10.97
   2  -5   5    6.41    1.44
  -2  -5  -5    8.34    2.12
  -2  -5  -5    4.83    1.37
  -2  -5  -5    4.86    2.14
   2  -5   5    0.94    1.30
  -2  -5  -5    5.83    1.56
   2  -5   5    5.07    1.26
  -2  -5  -5    7.23    2.28
   2   5   5    5.05    1.94
  -3  -5  -5   75.05    4.97
   3  -5   5   82.59    5.01
  -3  -5  -5   85.00    5.43
   3  -5   5   90.99    5.33
  -3  -5  -5   87.69    6.28
   3  -5   5   84.52    4.80
  -3  -5  -5   96.79    6.89
   3   5   5   86.19    4.72
   3   5   5   81.67    7.56
  -4  -5  -5  159.24    8.35
   4  -5   5  162.05    6.89
   4  -5   5  183.28    8.66
  -4  -5  -5  156.18    8.98
   4   5   5  164.91   10.23
  -5  -5  -5   22.78    4.09
   5  -5   5   26.95    4.23
   5   5   5   34.74    5.75
  -6  -5  -5   97.51    8.77
   6  -5   5   73.88    7.50
   6   5   5   91.58   10.25
   7  -5   5   -0.42    1.88
  -7  -5  -5    2.24    2.38
   8  -5   5   10.56    4.08
  -8  -5  -5   10.79    4.07
  -8  -6   5   46.06    7.74
   8  -6  -5   58.88    8.90
   7  -6  -5  107.25   11.13
  -7  -6   5   91.73   10.45
  -6  -6   5  240.33   13.94
   6  -6  -5  285.45   14.47
  -6   6   5  289.87   18.20
   5  -6  -5    5.81    2.76
  -5  -6   5    2.59    2.24
   5   6  -5    3.98    3.16
  -5   6   5    6.90    2.48
   4  -6  -5   37.11    4.96
  -4  -6   5   27.39    4.63
  -4   6   5   41.73    5.48
   4   6  -5   32.95    6.47
   3  -6  -5  154.04    7.92
  -3  -6   5  161.50    8.69
  -3  -6   5  152.09   10.40
   3  -6  -5  144.77    7.76
   3   6  -5  160.87   11.29
  -3   6   5  159.36    9.00
  -2  -6   5  142.34    7.08
  -2  -6   5  146.08    8.12
  -2  -6   5  171.03   10.82
   2  -6  -5  147.66    6.90
   2   6  -5  143.49   10.17
  -2   6   5  161.38    9.05
   1  -6  -5  215.87    7.71
  -1  -6   5  210.89    8.04
   1  -6  -5  230.01   11.31
  -1  -6   5  222.94    8.76
  -1  -6   5  214.44   11.40
  -1  -6   5  213.83   10.45
  -1  -6   5  223.67   12.67
   1  -6  -5  213.15   10.20
  -1   6   5  216.87   11.03
   1   6  -5  243.00   12.77
   0  -6   5  192.71    6.90
   0  -6   5  200.93   10.44
   0  -6  -5  197.30   10.27
   0  -6   5  200.05   11.88
   0  -6   5  175.92    9.61
   0  -6  -5  193.20    9.87
   0  -6  -5  192.20    6.44
   0  -6   5  201.94    6.99
   0  -6  -5  197.98    7.38
   0   6   5  201.98   10.61
   1  -6   5   -0.64    0.63
  -1  -6  -5    0.85    0.92
   1  -6   5    3.74    1.03
  -1  -6  -5    1.29    0.81
  -1  -6  -5    1.48    1.63
   1  -6   5    0.22    1.29
  -1  -6  -5   -0.12    1.64
   1  -6   5    1.88    1.87
  -1  -6  -5    6.73    2.38
   1   6   5    1.04    1.41
  -2  -6  -5   11.21    2.07
   2  -6   5   13.26    2.84
  -2  -6  -5   14.99    3.26
   2  -6   5   14.48    4.18
  -2  -6  -5   16.83    2.44
   2  -6   5   13.75    2.03
  -2  -6  -5   13.07    3.71
   2  -6   5   14.85    2.10
   2   6   5   15.81    3.41
   3  -6   5   13.32    2.83
  -3  -6  -5   14.16    2.73
  -3  -6  -5   10.78    3.35
   3  -6   5   16.14    2.59
   3  -6   5   14.05    2.39
   3   6   5   18.61    4.09
  -4  -6  -5  119.05    8.39
   4  -6   5  108.79    6.09
  -4  -6  -5  113.86    6.98
   4  -6   5  111.28    6.72
   4   6   5   97.43    9.69
  -5  -6  -5   12.77    3.06
   5  -6   5   12.65    3.05
   5   6   5   15.27    4.38
   6  -6   5  138.77    9.31
  -6  -6  -5  144.64    9.63
   6   6   5  133.72   12.95
   7  -6   5   39.88    6.40
  -7  -6  -5   47.34    6.92
   8  -6   5   27.16    6.14
  -8  -6  -5   30.11    5.86
   7  -7  -5   13.52    4.36
  -7  -7   5    7.45    4.11
  -6  -7   5   32.06    5.98
   6  -7  -5   26.52    5.27
   5  -7  -5    0.00    1.82
  -5  -7   5    1.63    2.22
  -5   7   5   -1.00    1.69
   4  -7  -5   14.95    3.28
  -4  -7   5   15.75    3.67
  -4   7   5   13.97    3.63
   4   7  -5   11.62    4.36
   3  -7  -5  235.03   10.33
  -3  -7   5  253.41   11.43
   3   7  -5  223.45   14.42
  -3   7   5  221.71   12.04
  -2  -7   5   54.71    6.29
   2  -7  -5   57.26    7.16
   2  -7  -5   52.90    4.68
  -2  -7   5   47.73    7.19
   2   7  -5   54.56    7.93
  -2   7   5   62.35    7.29
   1  -7  -5  173.54   10.59
  -1  -7   5  165.02   11.77
  -1  -7   5  164.10    7.03
  -1  -7   5  169.96    9.81
   1  -7  -5  168.01    6.67
  -1  -7   5  189.38    7.93
  -1   7   5  168.80   10.35
   0  -7   5  125.53    8.64
   0  -7   5  118.32   11.50
   0  -7  -5  125.46    4.94
   0  -7  -5  132.77    5.80
   0  -7   5  127.23    5.39
   0  -7  -5  143.06    9.33
   0  -7   5  128.31    5.50
   0   7   5  127.32    8.85
   1  -7   5   80.39    8.86
  -1  -7  -5   85.42    9.63
  -1  -7  -5   70.69    7.70
   1  -7   5   76.87    3.82
  -1  -7  -5   76.05    4.34
   1  -7   5   79.09    3.92
   1  -7   5   78.52    9.18
  -1  -7  -5   84.09    4.14
  -2  -7  -5  431.48   17.68
  -2  -7  -5  446.29   19.42
   2  -7   5  434.17   17.02
   2  -7   5  411.90   13.00
  -2  -7  -5  415.03   13.81
   2  -7   5  405.28   19.98
   2  -7   5  435.08   13.38
   2   7   5  416.77   17.80
  -3  -7  -5  198.29   11.97
   3  -7   5  197.88   10.09
  -3  -7  -5  193.33    8.88
   3  -7   5  208.46    8.64
   3   7   5  190.06   11.76
   4  -7   5  117.08    6.82
   4  -7   5  105.19    6.51
  -4  -7  -5   89.01    9.12
  -4  -7  -5   96.14    6.51
   4   7   5   96.55   10.27
  -5  -7  -5   40.85    5.66
   5  -7   5   31.97    4.72
   5   7   5   28.19    5.87
   6  -7   5    9.81    3.47
  -6  -7  -5   21.69    4.51
  -7  -7  -5   -1.44    2.27
   7  -7   5   -1.50    2.00
   6  -8  -5   67.00    8.12
  -6  -8   5   73.84    8.91
   5  -8  -5    6.81    2.76
  -5  -8   5    4.38    2.83
  -5   8   5    2.58    2.40
   4  -8  -5   41.57    5.25
  -4  -8   5   44.83    5.97
  -4   8   5   34.04    5.82
  -3  -8   5   -0.76    1.32
  -3  -8   5    3.71    2.30
   3  -8  -5    1.63    1.64
  -3   8   5    1.47    1.84
  -2  -8   5   13.11    3.54
   2  -8  -5   16.43    4.33
   2  -8  -5    6.23    1.78
   2   8  -5    9.49    4.11
  -2   8   5    8.49    3.25
   1  -8  -5    1.05    1.01
  -1  -8   5   -1.48    1.57
   1  -8  -5    1.00    1.85
   1  -8  -5    0.69    2.17
   0  -8   5   14.97    2.15
   0  -8  -5   14.88    2.24
   0  -8   5   10.84    3.55
   0  -8  -5   17.94    4.37
   0  -8  -5   13.08    1.78
   0  -8   5   16.29    2.43
  -1  -8  -5    0.25    1.97
  -1  -8  -5    2.37    1.09
  -1  -8  -5    3.48    2.65
   1  -8   5    2.56    1.01
   1  -8   5    1.33    0.97
   2  -8   5  230.84    8.40
  -2  -8  -5  213.76   12.43
  -2  -8  -5  215.51   13.61
  -2  -8  -5  223.19    8.87
  -3  -8  -5  103.20    6.39
  -3  -8  -5  117.49   11.12
   3  -8   5  126.69    6.46
   3   8   5  113.31   11.17
  -4  -8  -5   12.87    4.26
   4  -8   5   11.12    2.84
  -4  -8  -5   13.98    3.34
   4   8   5    9.69    3.98
  -5  -8  -5    8.86    3.06
   5  -8   5    6.85    2.74
   5   8   5    8.70    6.15
  -6  -8  -5  176.65   11.30
   6  -8   5  200.31   11.59
  -5  -9   5   22.22    4.97
   5  -9  -5   31.63    5.38
  -4  -9   5    7.38    3.07
   4  -9  -5   13.71    3.42
  -3  -9   5   36.90    5.15
  -3  -9   5   50.54    6.77
   3  -9  -5   43.11    4.94
  -2  -9   5   31.52    5.62
   2  -9  -5   33.28    3.78
  -2  -9   5   37.46    4.68
  -1  -9   5   17.88    4.56
   1  -9  -5   14.48    5.40
   1  -9  -5   16.27    2.42
   0  -9  -5    0.63    1.04
   0  -9   5    1.26    2.10
   0  -9  -5    0.45    2.93
   0  -9  -5    0.82    2.73
   0  -9   5   -0.41    1.16
  -1  -9  -5    9.79    3.97
  -1  -9  -5   18.24    5.36
  -1  -9  -5   12.36    2.11
   1  -9   5   15.97    2.31
  -2  -9  -5   74.28    9.07
  -2  -9  -5   75.45    4.76
   2  -9   5   61.54    4.08
  -2  -9  -5   80.57   10.12
  -3  -9  -5  374.77   13.86
   3  -9   5  359.10   13.08
  -3  -9  -5  354.14   18.62
   4  -9   5  116.88    7.17
  -4  -9  -5  110.61    7.40
  -4  -9  -5  108.27   11.84
  -5  -9  -5  168.70   10.20
   5  -9   5  160.60    9.65
   4 -10  -5    4.75    2.50
  -4 -10   5    2.86    2.56
  -3 -10   5   82.91    9.61
   3 -10  -5   66.36    6.14
  -3 -10   5   70.35    7.02
  -2 -10   5    1.66    1.67
   2 -10  -5    3.98    1.68
  -2 -10   5   -0.16    2.25
   1 -10  -5   13.88    2.40
  -1 -10   5   10.60    3.92
   0 -10  -5  177.08    6.96
   0 -10   5  173.82   12.43
   0 -10  -5  147.22   14.83
   1 -10   5   95.69   11.06
  -1 -10  -5  102.82    5.24
  -1 -10  -5  104.05   12.70
   1 -10   5   98.10    5.12
  -2 -10  -5   17.72    5.58
  -2 -10  -5   21.60    3.19
   2 -10   5   21.15    2.93
  -3 -10  -5  648.37   27.85
   3 -10   5  590.62   19.57
  -3 -10  -5  632.66   20.64
  -4 -10  -5   24.76    4.36
   4 -10   5   20.13    3.61
  -4 -10  -5   10.08    4.46
   0 -11  -5   17.06    6.08
   0 -11   5   23.39    6.27
   9   0  -6   -0.39    2.82
  -9   0   6   -2.00    2.35
  -8   0   6  410.73   19.15
   8   0  -6  401.60   19.67
   7   0  -6   -1.53    2.02
  -7   0   6   -1.10    1.79
  -6   0   6 1408.60   42.81
   6   0  -6 1396.92   43.27
   5   0  -6   -1.10    1.06
  -5   0   6   -0.16    1.38
  -4   0   6 1052.69   32.18
   4   0  -6 1079.99   32.33
   3   0  -6   -0.08    0.88
  -3   0   6   -0.89    0.72
   2   0  -6  317.33   11.45
   1   0  -6  -14.43    0.70
   1   0  -6  -12.27    0.80
   0   0   6 2056.69   51.38
   0   0   6 2003.31   52.28
   0   0  -6 2051.65   52.87
   0   0  -6 2089.08   51.43
   0   0  -6 2048.48   52.52
   0   0   6 2068.98   53.08
   1   0   6   10.09    1.74
  -1   0  -6    0.69    0.65
   2   0   6 5504.21  135.70
  -2   0  -6 5392.73  135.51
   3   0   6   -0.56    0.83
   3   0   6   -0.51    0.41
  -3   0  -6   -0.86    0.61
  -4   0  -6  564.97   18.33
   4   0   6  555.38   18.86
  -5   0  -6    0.34    1.14
   5   0   6    0.37    1.30
  -6   0  -6    3.02    2.00
   6   0   6    0.78    1.61
   7   0   6   -0.96    1.93
  -7   0  -6   -0.86    1.75
   8   0   6   69.77    8.82
  -8   0  -6   51.42    7.04
   9   0   6    1.13    2.89
  -9   0  -6    2.67    2.91
  -9  -1   6  194.78   13.38
   9  -1  -6  173.88   15.71
   9   1  -6  181.11   15.51
   8  -1  -6    9.49    4.08
  -8  -1   6   10.24    3.87
  -8   1   6    9.01    3.58
   8   1  -6   10.09    4.21
   7  -1  -6    3.81    2.97
  -7  -1   6    5.27    3.05
  -7   1   6    4.69    2.67
   7   1  -6    6.42    3.12
  -6  -1   6   10.80    3.36
   6  -1  -6   10.43    3.58
   6   1  -6    8.75    3.07
  -6   1   6    6.35    2.63
   5  -1  -6   13.57    3.30
  -5  -1   6   19.86    3.96
   5   1  -6   15.31    3.32
  -5   1   6   15.65    3.30
   4  -1  -6  200.64    9.85
  -4  -1   6  197.60    9.90
  -4   1   6  178.22    9.05
   4   1  -6  196.99    9.59
  -3  -1   6 1294.84   36.91
   3  -1  -6 1285.83   36.46
  -3   1   6 1237.41   35.95
   3   1  -6 1296.55   36.27
   2  -1  -6  505.21   16.31
   2   1  -6  486.49   15.99
  -2   1   6  519.56   16.30
   2   1  -6  504.78   16.40
  -1  -1   6  271.04    9.87
   1  -1  -6  266.90    9.74
   1  -1  -6  242.00    9.12
  -1  -1   6  255.76    9.25
   1   1  -6  269.08    9.63
   1   1  -6  261.89    9.20
   0  -1   6  493.57   14.64
   0  -1  -6  509.73   14.93
   0  -1   6  448.86   14.17
   0  -1  -6  498.52   14.17
   0  -1   6  490.93   14.63
   0   1  -6  458.28   14.37
   0   1   6  474.67   14.72
   0   1  -6  476.53   14.28
  -1  -1  -6 4602.81  111.41
  -1  -1  -6 4309.38  111.83
   1  -1   6 4556.05  111.42
   1  -1   6 4677.77  111.91
  -1  -1  -6 4314.13  111.68
   1   1   6 4566.15  112.28
   1   1   6 4321.51  112.09
  -1   1  -6 4623.74  112.13
  -2  -1  -6  572.08   16.79
   2  -1   6  563.91   17.06
   2   1   6  561.70   17.34
  -2   1  -6  579.17   16.77
   2   1   6  565.52   16.01
   2   1   6  562.18   17.39
   3  -1   6  188.00    8.18
  -3  -1  -6  180.18    7.73
  -3   1  -6  182.10    7.65
   3   1   6  193.07    6.83
   3   1   6  190.00    8.28
  -4  -1  -6   70.31    3.38
  -4  -1  -6   68.91    4.88
   4  -1   6   56.29    5.28
  -4   1  -6   70.42    4.79
   4   1   6   65.25    5.76
  -5  -1  -6  169.72    6.19
  -5  -1  -6  155.66    8.53
   5  -1   6  189.44    9.48
   5   1   6  173.88    9.23
  -5   1  -6  165.66    8.56
  -6  -1  -6    3.24    1.07
  -6  -1  -6    4.97    2.54
   6  -1   6    3.54    2.26
   6   1   6    6.41    2.60
  -6   1  -6    7.92    2.58
   7  -1   6  438.79   18.95
  -7  -1  -6  430.13   18.16
  -7   1  -6  427.49   17.78
   7   1   6  429.32   18.64
   8  -1   6  223.27   13.62
  -8  -1  -6  217.40   12.88
  -8   1  -6  227.46   12.87
   8   1   6  233.73   13.79
   9  -1   6  365.75   19.21
  -9  -1  -6  331.10   17.63
   9   1   6  367.59   19.04
   9  -2  -6   -0.90    2.78
  -9  -2   6    1.86    2.86
  -8  -2   6    2.79    3.02
   8  -2  -6   -0.92    2.16
   8   2  -6    0.01    2.52
   7  -2  -6  171.00   11.62
  -7  -2   6  175.90   11.59
  -7   2   6  166.11   10.35
   7   2  -6  171.92   11.08
  -6  -2   6 2126.44   62.40
   6  -2  -6 2070.30   62.22
   6   2  -6 2272.71   62.11
  -6   2   6 2224.88   61.00
  -5  -2   6 1020.62   33.10
   5  -2  -6 1017.86   32.93
  -5   2   6 1055.85   31.87
   5   2  -6 1039.73   32.48
   4  -2  -6 1284.64   38.30
  -4  -2   6 1296.28   38.70
   4   2  -6 1330.23   37.84
   4   2  -6 1307.52   39.36
  -4   2   6 1288.11   37.09
   3  -2  -6   60.73    5.48
  -3  -2   6   74.30    6.58
  -3   2   6   55.49    4.10
   3   2  -6   70.27    4.67
   3   2  -6   59.87    5.78
  -2  -2   6  343.71   12.33
  -2  -2   6  327.94   12.59
   2  -2  -6  362.61   12.39
   2   2  -6  345.47   11.83
  -2   2   6  343.65   11.65
   2   2  -6  349.31   13.35
   1  -2  -6   56.96    3.51
  -1  -2   6   63.27    4.02
  -1  -2   6   57.86    3.60
  -1  -2   6   56.59    4.09
   1   2  -6   60.74    4.40
   1   2  -6   58.71    2.91
   1   2  -6   59.06    3.36
   0  -2  -6   15.01    2.19
   0  -2   6   12.57    1.84
   0  -2   6   17.53    1.18
   0  -2  -6   10.49    1.11
   0  -2  -6   16.52    1.80
   0  -2   6   15.21    2.39
   0  -2   6   12.04    1.86
   0   2  -6    6.44    1.23
   0   2   6    6.49    1.26
   0   2   6    9.76    1.65
   0   2  -6   12.92    2.20
  -1  -2  -6    0.54    0.56
   1  -2   6    0.61    0.63
  -1  -2  -6   -0.16    0.58
   1  -2   6    0.06    0.48
  -1  -2  -6    0.40    0.86
   1   2   6    0.58    0.78
   1   2   6    0.47    0.60
   1   2   6    0.17    0.45
  -1   2  -6    1.53    0.74
   2  -2   6  117.80    5.56
  -2  -2  -6  118.44    5.78
  -2  -2  -6  126.70    5.59
   2  -2   6  127.93    5.50
  -2  -2  -6  138.07    6.41
  -2  -2  -6  124.25    5.44
  -2   2  -6  131.65    5.57
   2   2   6  134.29    5.89
   2   2   6  113.81    5.87
   3  -2   6   92.86    5.26
  -3  -2  -6   83.81    4.95
   3  -2   6   89.89    3.10
  -3  -2  -6   89.92    4.59
  -3   2  -6   88.11    4.83
   3   2   6   91.30    4.89
   3   2   6  105.05    5.70
   4  -2   6 2186.08   60.05
  -4  -2  -6 2161.31   57.74
  -4  -2  -6 2246.35   59.78
   4   2   6 2316.72   60.47
  -4   2  -6 2292.35   59.12
  -5  -2  -6   80.05    4.59
   5  -2   6   70.09    6.65
  -5  -2  -6   82.81    6.05
   5   2   6   72.92    6.85
  -5   2  -6   88.47    5.87
  -6  -2  -6   87.75    4.91
  -6  -2  -6   78.85    7.52
   6  -2   6   85.50    8.37
   6   2   6   75.90    7.50
  -6   2  -6   82.05    7.26
   7  -2   6   20.74    4.44
  -7  -2  -6   29.76    5.33
   7   2   6   26.65    5.03
  -7   2  -6   28.21    4.77
   8  -2   6    9.05    3.90
  -8  -2  -6   13.37    4.06
   8   2   6   13.36    4.39
  -9  -2  -6    1.48    2.71
   9  -2   6    4.38    3.67
   9  -3  -6    1.14    2.98
  -9  -3   6    1.00    2.76
   8  -3  -6    3.72    3.26
  -8  -3   6    2.96    3.27
   7  -3  -6   23.84    5.20
  -7  -3   6   24.46    5.06
   7   3  -6   21.66    4.72
   6  -3  -6    2.30    2.07
  -6  -3   6    1.19    1.68
   6   3  -6    2.59    2.65
   6   3  -6   -1.92    1.44
  -6   3   6    1.34    1.60
  -5  -3   6   18.18    3.87
   5  -3  -6   20.32    4.15
   5   3  -6   26.85    5.37
   5   3  -6   19.91    3.78
  -5   3   6   22.98    3.60
  -4  -3   6    6.68    2.51
   4  -3  -6    9.79    2.76
   4   3  -6    5.79    2.29
   4   3  -6   10.32    2.55
  -4   3   6    9.71    2.21
   3  -3  -6    9.58    2.28
   3   3  -6    8.38    1.99
  -3   3   6    7.94    1.72
   3   3  -6   10.51    2.83
   2  -3  -6   35.03    3.77
  -2  -3   6   34.72    4.36
  -2  -3   6   38.74    4.05
   2   3  -6   33.26    4.49
  -2   3   6   47.47    4.05
   2   3  -6   41.18    2.95
   2   3  -6   38.34    3.84
  -1  -3   6  255.69    9.13
  -1  -3   6  246.90   10.95
  -1  -3   6  258.02    8.49
   1  -3  -6  244.72    8.83
  -1  -3   6  271.50    9.79
  -1   3   6  263.61    7.90
   1   3  -6  236.40    7.98
   1   3  -6  248.79   11.01
  -1   3   6  248.75    9.48
   0  -3   6  191.49    9.08
   0  -3  -6  188.18    6.93
   0  -3  -6  186.10    6.48
   0  -3   6  187.16    6.95
   0  -3  -6  198.51    7.46
   0  -3   6  183.05    6.90
   0   3  -6  177.94    8.64
   0   3   6  183.01    7.77
   0   3  -6  185.45    5.79
  -1  -3  -6  912.26   24.99
  -1  -3  -6  879.35   27.01
   1  -3   6  932.22   24.28
   1  -3   6  890.89   24.27
  -1  -3  -6  895.61   24.05
  -1  -3  -6  875.52   24.17
   1  -3   6  904.83   27.43
  -1  -3  -6  874.09   25.31
   1   3   6  888.16   24.53
  -1   3  -6  899.67   23.51
   1   3   6  853.58   25.73
   2  -3   6  943.71   26.77
  -2  -3  -6  962.63   27.56
  -2  -3  -6  980.63   27.33
  -2  -3  -6  963.62   28.82
   2  -3   6  928.84   26.45
  -2  -3  -6  994.32   26.86
   2   3   6  992.16   28.25
   2   3   6  983.22   27.45
   2   3   6  980.77   27.52
   3  -3   6  582.58   18.49
  -3  -3  -6  630.66   20.12
   3  -3   6  585.47   18.82
   3  -3   6  606.47   16.89
  -3  -3  -6  616.07   18.93
  -3  -3  -6  615.05   18.94
   3   3   6  579.57   19.34
  -3   3  -6  618.90   18.28
   3   3   6  617.32   19.37
  -4  -3  -6   76.99    5.38
   4  -3   6   80.06    5.44
  -4  -3  -6   77.56    4.95
   4   3   6   75.78    6.47
  -4   3  -6   72.33    4.73
  -5  -3  -6    0.05    1.07
   5  -3   6   -0.52    1.21
  -5  -3  -6    0.56    1.47
  -5   3  -6   -1.46    0.89
   5   3   6    1.29    1.66
  -6  -3  -6  144.83    9.08
  -6  -3  -6  129.39    7.22
   6  -3   6  150.66    9.39
  -6   3  -6  162.88    8.65
   6   3   6  152.63    9.41
   7  -3   6  475.03   20.37
  -7  -3  -6  507.44   20.28
   7   3   6  471.15   20.05
   8  -3   6   75.58    9.46
  -8  -3  -6   83.63    9.52
   9  -3   6  646.50   27.65
  -9  -3  -6  638.40   26.82
  -8  -4   6   13.93    4.55
   8  -4  -6   20.35    5.34
  -7  -4   6   56.12    8.07
   7  -4  -6   54.47    7.93
  -6  -4   6  496.53   20.42
   6  -4  -6  470.49   19.99
   6   4  -6  445.58   21.92
   6   4  -6  491.72   20.83
  -6   4   6  461.12   16.45
  -5  -4   6 2531.43   70.36
   5  -4  -6 2512.08   69.76
  -5   4   6 2509.52   66.32
   5   4  -6 2563.51   67.84
   5   4  -6 2462.11   73.13
  -5   4   6 2502.80   66.47
  -4  -4   6  496.98   18.86
   4  -4  -6  476.73   18.10
  -4   4   6  523.60   16.96
   4   4  -6  487.09   16.72
   4   4  -6  463.12   20.29
   3  -4  -6  315.68   11.99
  -3  -4   6  279.44   12.04
   3  -4  -6  272.27   11.47
  -3   4   6  312.65    9.45
   3   4  -6  267.68   13.64
   3   4  -6  218.21    9.56
  -3   4   6  303.35   11.36
   2  -4  -6  439.58   14.31
  -2  -4   6  427.99   16.81
  -2  -4   6  412.77   14.18
   2   4  -6  421.03   12.34
  -2   4   6  428.02   14.70
   2   4  -6  397.54   16.83
  -2   4   6  385.02   11.71
  -1  -4   6   26.85    4.15
   1  -4  -6   30.40    2.99
  -1  -4   6   36.66    3.64
  -1  -4   6   32.48    3.19
  -1  -4   6   37.85    3.78
   1   4  -6   35.86    5.05
  -1   4   6   36.65    4.15
   0  -4   6   25.78    2.62
   0  -4  -6   22.89    2.77
   0  -4  -6   26.36    3.33
   0  -4   6   27.93    2.74
   0  -4  -6   29.99    3.35
   0  -4  -6   28.52    2.41
   0  -4   6   29.95    4.67
   0   4   6   24.26    3.44
  -1  -4  -6   97.06    5.70
   1  -4   6   95.33    4.34
  -1  -4  -6   98.70    4.37
  -1  -4  -6  109.07    6.98
   1  -4   6   97.95    6.95
   1  -4   6   95.48    4.46
  -1  -4  -6   96.87    5.24
  -1  -4  -6  101.24    5.00
   1   4   6   90.69    5.16
   1   4   6   93.39    5.90
  -2  -4  -6  550.26   16.45
  -2  -4  -6  539.76   19.27
   2  -4   6  544.14   16.31
   2  -4   6  562.05   17.24
  -2  -4  -6  531.38   16.85
  -2  -4  -6  531.80   17.92
   2  -4   6  529.12   16.02
   2   4   6  545.35   18.00
   2   4   6  525.87   16.39
   2   4   6  564.10   18.81
   3  -4   6 1303.05   35.28
  -3  -4  -6 1252.56   37.66
   3  -4   6 1303.19   35.68
   3  -4   6 1299.24   34.61
  -3  -4  -6 1287.14   36.73
  -3  -4  -6 1267.35   35.65
   3   4   6 1318.64   37.54
   3   4   6 1277.46   35.94
  -3   4  -6 1250.07   34.27
   4  -4   6  373.53   14.31
  -4  -4  -6  379.12   14.37
  -4  -4  -6  383.42   14.54
   4   4   6  391.15   15.82
   4   4   6  396.92   14.68
  -5  -4  -6  448.64   16.94
   5  -4   6  427.08   16.83
  -5  -4  -6  430.59   16.20
   5   4   6  446.15   17.03
   5   4   6  447.37   18.31
  -5   4  -6  434.95   15.33
   6  -4   6   12.24    3.35
  -6  -4  -6    9.90    2.74
  -6  -4  -6    8.21    2.80
   6   4   6   10.47    3.54
   6   4   6   15.17    4.10
   7  -4   6   34.81    5.89
  -7  -4  -6   32.97    5.48
   7   4   6   34.30    6.17
   8  -4   6    0.89    2.34
  -8  -4  -6    1.39    2.21
   8  -5  -6    9.89    4.27
  -8  -5   6   14.40    4.78
   7  -5  -6  137.35   12.24
  -7  -5   6  154.90   11.18
   6  -5  -6   98.80    9.79
  -6  -5   6  100.64    9.82
  -6   5   6   96.79    6.62
  -5  -5   6  572.03   22.01
   5  -5  -6  564.69   21.39
   5   5  -6  557.94   25.02
  -5   5   6  561.54   19.64
  -4  -5   6   -1.77    1.13
   4  -5  -6   -0.23    1.35
   4   5  -6   -0.76    1.89
  -4   5   6    0.09    1.13
  -3  -5   6   60.49    6.12
   3  -5  -6   78.81    5.55
  -3  -5   6   90.36    8.91
   3   5  -6   70.08    8.14
  -3   5   6   79.34    6.90
   3   5  -6   79.12    3.96
  -2  -5   6    6.36    1.90
  -2  -5   6    6.91    1.84
  -2  -5   6   10.64    3.13
   2  -5  -6    9.26    2.08
  -2   5   6   10.71    2.69
   2   5  -6    8.63    2.77
   1  -5  -6    3.74    1.73
   1  -5  -6    4.34    1.23
  -1  -5   6    3.34    1.20
  -1  -5   6    2.03    1.82
  -1  -5   6    2.48    1.37
  -1  -5   6    2.20    1.22
   1   5  -6    8.56    2.74
  -1   5   6    5.61    2.06
   0  -5   6    0.11    0.70
   0  -5   6    4.13    2.20
   0  -5  -6    0.42    0.82
   0  -5  -6    0.59    1.01
   0  -5  -6    0.47    1.02
   0  -5   6    0.41    0.78
   0  -5   6    1.09    1.15
   0  -5  -6    1.01    0.70
   0   5   6    1.57    1.63
  -1  -5  -6  466.23   14.18
   1  -5   6  453.82   13.19
   1  -5   6  438.01   15.97
  -1  -5  -6  441.46   16.12
  -1  -5  -6  429.19   15.48
  -1  -5  -6  434.69   13.17
   1  -5   6  446.63   18.38
  -1  -5  -6  403.47   17.35
   1  -5   6  434.34   13.31
   1   5   6  441.40   16.79
   2  -5   6   47.17    3.31
  -2  -5  -6   48.14    5.83
  -2  -5  -6   59.90    5.39
  -2  -5  -6   49.17    3.48
   2  -5   6   49.90    3.25
  -2  -5  -6   50.82    5.51
  -2  -5  -6   50.64    3.72
   2  -5   6   56.04    5.26
   2   5   6   50.62    5.46
   2   5   6   62.96    6.63
  -3  -5  -6  346.49   14.11
  -3  -5  -6  340.19   12.93
  -3  -5  -6  362.22   12.75
   3  -5   6  345.03   12.09
  -3  -5  -6  346.97   14.94
   3  -5   6  329.17   12.30
   3  -5   6  358.19   12.54
   3   5   6  336.49   14.51
   3   5   6  345.82   12.05
   4  -5   6   52.00    5.30
  -4  -5  -6   58.41    5.63
   4  -5   6   52.86    3.67
  -4  -5  -6   50.23    5.85
   4   5   6   57.63    6.66
   5  -5   6    2.00    1.95
  -5  -5  -6    1.68    1.66
   5   5   6    2.34    2.28
   6  -5   6   19.02    4.13
  -6  -5  -6   24.04    4.59
   6   5   6   26.23    5.42
   7  -5   6   16.05    4.18
  -7  -5  -6   15.84    4.37
  -8  -5  -6   57.77    7.90
   8  -5   6   63.71    8.40
  -7  -6   6   21.92    5.20
   7  -6  -6    5.82    3.44
  -6  -6   6   24.74    5.21
   6  -6  -6   27.08    5.30
  -6   6   6   19.06    3.86
   5  -6  -6  482.45   19.74
  -5  -6   6  544.62   21.07
  -5   6   6  499.38   19.09
   4  -6  -6  248.38   11.66
  -4  -6   6  237.06   12.07
   4   6  -6  213.88   14.26
  -4   6   6  228.04   11.44
  -3  -6   6   51.33    5.80
  -3  -6   6   53.76    7.57
   3  -6  -6   50.22    5.25
   3   6  -6   46.60    7.08
  -3   6   6   54.63    6.28
  -2  -6   6   64.36    6.24
   2  -6  -6   59.88    4.42
  -2  -6   6   74.72    8.70
  -2  -6   6   58.00    5.21
  -2   6   6   73.40    7.30
   2   6  -6   56.20    7.52
   1  -6  -6  180.58    7.01
   1  -6  -6  184.50    9.81
  -1  -6   6  174.33    8.96
  -1  -6   6  165.36    7.19
  -1  -6   6  175.91    7.89
  -1  -6   6  155.04   10.64
  -1   6   6  167.93    9.53
   1   6  -6  164.98   10.67
   0  -6  -6   96.15    4.17
   0  -6  -6   89.54    7.89
   0  -6   6   95.83    4.68
   0  -6   6   96.92    6.96
   0  -6  -6   87.98    6.38
   0  -6   6  119.76   10.88
   0  -6   6   86.85    4.47
   0  -6   6   81.75    6.19
   0  -6  -6   84.23    4.72
   0   6   6   96.83    8.45
   1  -6   6  230.50   13.13
  -1  -6  -6  223.11   12.45
  -1  -6  -6  220.33   10.76
  -1  -6  -6  212.93    7.82
  -1  -6  -6  215.35   10.85
   1  -6   6  240.31    7.95
   1  -6   6  225.64    8.02
   1  -6   6  227.10   11.03
  -1  -6  -6  216.26    8.52
   1   6   6  225.69   11.67
   2  -6   6    1.65    1.02
  -2  -6  -6    1.37    1.07
   2  -6   6    2.24    1.73
  -2  -6  -6    2.38    2.28
   2  -6   6    0.83    0.91
   2  -6   6   -1.62    1.68
  -2  -6  -6    2.50    1.88
  -2  -6  -6    0.67    1.11
   2   6   6    1.86    1.71
   3  -6   6   79.04    5.13
  -3  -6  -6   83.89    5.39
   3  -6   6   84.78    5.24
  -3  -6  -6   86.56    8.33
   3  -6   6   91.61    5.98
   3   6   6   81.72    8.02
   4  -6   6   34.02    3.96
  -4  -6  -6   30.07    4.27
  -4  -6  -6   38.31    5.85
   4  -6   6   35.78    4.57
   4   6   6   30.26    5.40
   5  -6   6   65.94    6.64
  -5  -6  -6   55.71    6.20
   5   6   6   47.89    7.36
  -6  -6  -6  113.32    9.89
   6  -6   6  129.68    8.96
   6   6   6  111.41   11.54
  -7  -6  -6   87.26    9.30
   7  -6   6   79.82    9.16
   7  -7  -6    4.97    3.45
  -7  -7   6    8.29    3.88
   6  -7  -6  370.54   17.48
  -6  -7   6  355.43   17.64
  -5  -7   6  154.39   10.47
   5  -7  -6  165.56   10.17
  -5   7   6  157.11   10.00
  -4  -7   6   48.30    6.25
   4  -7  -6   50.01    6.00
  -4   7   6   48.19    6.36
  -3  -7   6   14.72    3.47
   3  -7  -6   11.90    2.68
  -3   7   6    6.37    2.74
   3   7  -6   11.38    4.14
  -2  -7   6   56.52    7.80
   2  -7  -6   69.58    4.81
  -2  -7   6   62.98    6.63
   2  -7  -6   78.77    8.47
  -2   7   6   66.69    7.62
   2   7  -6   71.46    9.20
   1  -7  -6  245.69   12.78
  -1  -7   6  240.01   11.77
   1  -7  -6  245.10    9.49
   1  -7  -6  245.02    8.97
  -1  -7   6  226.28   14.17
  -1  -7   6  232.83    9.30
  -1  -7   6  255.56   10.14
  -1   7   6  237.01   12.70
   0  -7   6  636.90   26.16
   0  -7  -6  618.39   19.00
   0  -7   6  623.14   18.55
   0  -7   6  643.23   23.01
   0  -7  -6  628.73   23.33
   0  -7  -6  648.85   17.97
   0  -7   6  639.81   18.83
   0   7   6  631.80   23.93
   1  -7   6  739.45   21.67
  -1  -7  -6  771.59   22.54
   1  -7   6  755.56   29.88
  -1  -7  -6  794.73   26.87
   1  -7   6  779.11   21.73
  -1  -7  -6  815.83   21.95
  -1  -7  -6  771.41   29.13
  -2  -7  -6   21.37    4.15
   2  -7   6   29.27    4.58
   2  -7   6   31.60    3.18
  -2  -7  -6   30.40    5.67
   2  -7   6   28.84    3.07
  -2  -7  -6   28.17    3.20
   2  -7   6   27.89    5.57
   2   7   6   36.78    5.33
   3  -7   6   -0.58    1.34
  -3  -7  -6    0.12    1.34
   3  -7   6    0.00    1.14
  -3  -7  -6   -2.24    1.49
   3   7   6    5.11    2.89
  -4  -7  -6    6.89    2.43
   4  -7   6    8.35    2.46
  -4  -7  -6    8.53    3.24
   4  -7   6    9.67    2.57
   4   7   6    7.51    3.38
  -5  -7  -6   13.25    3.63
   5  -7   6   16.33    3.57
   5   7   6   17.10    4.79
  -6  -7  -6    0.00    1.99
   6  -7   6    4.07    2.50
   7  -7   6    1.71    2.37
  -7  -7  -6   -2.05    1.92
  -6  -8   6    8.22    3.86
   6  -8  -6   23.98    5.25
   5  -8  -6   89.05    8.97
  -5  -8   6   98.26    9.61
  -5   8   6   75.99    8.78
   4  -8  -6  326.47   14.10
  -4  -8   6  324.86   14.94
  -4   8   6  293.92   15.41
   3  -8  -6  114.30   11.61
   3  -8  -6  116.64    7.17
  -3  -8   6  123.28    7.96
  -3   8   6  107.64   10.78
  -2  -8   6    0.45    1.51
   2  -8  -6    0.73    1.20
   2  -8  -6   -2.15    1.80
  -2   8   6   -0.33    1.71
   2   8  -6    0.81    2.74
  -1  -8   6   51.93    6.56
   1  -8  -6   49.96    4.21
   1  -8  -6   58.04    7.67
  -1   8   6   48.84    7.15
   0  -8   6  274.80   10.16
   0  -8   6  281.45   14.13
   0  -8  -6  265.41    9.30
   0  -8  -6  282.39   14.51
  -1  -8  -6   25.43    2.83
   1  -8   6   29.81    3.09
  -1  -8  -6   39.61    7.38
  -1  -8  -6   26.19    5.12
  -2  -8  -6   47.37    6.53
  -2  -8  -6   54.42    4.62
  -2  -8  -6   35.91    6.55
   2  -8   6   46.50    4.09
  -3  -8  -6    2.20    2.62
  -3  -8  -6   -0.25    1.17
   3  -8   6   -0.51    1.16
   3   8   6    1.80    2.51
  -4  -8  -6  102.59   10.79
   4  -8   6  114.74    6.99
  -4  -8  -6   88.27    7.64
   4   8   6   91.66   10.32
  -5  -8  -6   27.69    4.84
   5  -8   6   28.35    4.52
   5   8   6   22.77    5.60
   6  -8   6    7.35    3.29
  -6  -8  -6    7.43    3.17
  -5  -9   6   44.26    6.66
   5  -9  -6   57.44    7.13
   4  -9  -6   13.11    3.38
  -4  -9   6   11.11    3.41
   3  -9  -6   41.40    4.88
  -3  -9   6   46.19    5.87
  -2  -9   6   50.88    6.98
   2  -9  -6   48.69    4.84
  -2  -9   6   43.59    5.37
   1  -9  -6   39.88    6.88
  -1  -9   6   33.85    5.99
   1  -9  -6   29.65    3.45
   0  -9   6  710.71   21.55
   0  -9  -6  752.88   20.80
   0  -9  -6  728.62   28.20
   0  -9   6  684.38   26.99
   0  -9  -6  671.85   29.69
   1  -9   6   95.33    5.19
  -1  -9  -6   91.66    5.02
   1  -9   6  106.81   11.09
  -1  -9  -6  101.99   11.69
  -1  -9  -6   93.42   10.20
  -2  -9  -6   66.27    8.15
   2  -9   6   59.58    4.23
  -2  -9  -6   60.44    5.07
  -2  -9  -6   71.13    9.92
  -3  -9  -6  165.40    8.43
   3  -9   6  168.68    8.07
  -3  -9  -6  158.62   12.04
  -4  -9  -6    1.78    3.08
   4  -9   6    5.68    2.38
  -4  -9  -6    0.78    1.68
  -5  -9  -6   44.68    6.15
   5  -9   6   49.56    6.02
   3 -10  -6  198.83    9.81
  -3 -10   6  198.73   10.63
  -2 -10   6    3.26    1.83
  -2 -10   6   -0.80    1.94
   2 -10  -6    2.35    1.75
  -1 -10   6   11.03    4.21
   1 -10  -6   12.64    2.48
   0 -10  -6   36.59    3.51
   0 -10  -6   31.80    7.64
   0 -10   6   27.31    3.62
   0 -10   6   32.38    6.52
   1 -10   6   92.71   10.91
  -1 -10  -6  100.57    5.35
   1 -10   6   89.05    5.38
  -1 -10  -6   94.12   11.84
   2 -10   6   -0.10    1.40
  -2 -10  -6   -4.87    1.87
  -2 -10  -6    2.58    1.75
   3 -10   6   46.57    4.90
  -3 -10  -6   50.20    5.32
  -3 -10  -6   60.41    9.59
  -9   0   7   29.37    6.26
   9   0  -7   14.73    5.27
   8   0  -7    1.85    2.84
  -8   0   7    2.37    2.50
  -7   0   7  516.88   21.17
   7   0  -7  471.18   21.10
   6   0  -7   -0.53    1.44
  -6   0   7    0.84    1.87
   5   0  -7  649.81   23.24
  -5   0   7  648.27   23.02
   4   0  -7   -0.16    1.09
  -4   0   7   -1.63    1.00
  -3   0   7 4581.52  120.82
   3   0  -7 4894.43  120.93
   2   0  -7   -0.62    0.54
  -1   0   7  315.78   11.54
   1   0  -7  321.57   11.15
   1   0  -7  320.26   10.22
   0   0  -7   -0.49    0.52
   0   0  -7   -0.20    0.76
   0   0   7   -1.17    0.42
   0   0   7   -0.97    0.73
  -1   0  -7  225.41    7.22
   1   0   7  237.87    7.69
   1   0   7  233.26    8.78
   2   0   7   -0.52    0.73
   2   0   7    0.43    0.69
  -2   0  -7    0.65    0.90
   3   0   7 1357.74   38.44
   3   0   7 1407.64   35.14
  -3   0  -7 1387.62   37.79
  -4   0  -7   -1.22    1.00
   4   0   7   -0.56    0.89
   5   0   7   43.80    5.36
  -5   0  -7   45.66    5.22
   6   0   7   -0.46    1.69
  -6   0  -7   -2.43    1.07
   7   0   7   11.88    3.54
  -7   0  -7    8.49    3.09
  -8   0  -7   -3.21    1.56
   8   0   7    1.33    2.59
   9   0   7   41.52    7.16
  -9   0  -7   47.72    7.54
   9  -1  -7   13.79    5.16
  -9  -1   7   12.49    4.65
   9   1  -7    5.51    4.26
   8  -1  -7  143.29   13.06
  -8  -1   7  127.42   12.24
  -8   1   7  115.80   11.04
   8   1  -7  130.53   11.98
   7  -1  -7    1.76    2.53
  -7  -1   7    1.39    2.47
   7   1  -7   -1.84    1.82
  -7   1   7   -0.25    2.06
  -6  -1   7  566.72   22.24
   6  -1  -7  574.07   22.44
   6   1  -7  575.81   22.17
  -6   1   7  568.56   21.64
  -5  -1   7   12.65    3.50
   5  -1  -7   10.18    3.00
   5   1  -7    8.51    2.72
  -5   1   7   11.98    2.95
   4  -1  -7  885.60   27.67
  -4  -1   7  836.49   27.58
  -4   1   7  859.61   27.07
   4   1  -7  845.20   27.14
   3  -1  -7   52.44    5.16
  -3  -1   7   54.63    5.60
  -3   1   7   62.60    5.75
   3   1  -7   50.49    4.90
   2  -1  -7  249.30    9.65
   2   1  -7  221.64    9.33
   2   1  -7  220.28    9.12
  -1  -1   7    5.67    1.52
   1  -1  -7    7.95    1.75
   1  -1  -7    2.46    1.24
  -1  -1   7    3.63    1.21
  -1  -1   7    5.12    1.52
   1   1  -7    6.21    1.59
   1   1  -7    7.75    1.73
   0  -1  -7  343.17   12.19
   0  -1   7  376.29   12.32
   0  -1  -7  383.07   11.81
   0  -1   7  368.33   11.90
   0  -1   7  366.20   11.97
   0   1   7  384.66   12.51
   0   1  -7  360.01   11.85
   0   1  -7  369.35   11.91
  -1  -1  -7   68.00    3.78
  -1  -1  -7   74.59    4.13
  -1  -1  -7   72.38    3.73
   1  -1   7   70.56    4.01
   1  -1   7   64.56    3.60
   1   1   7   82.06    4.45
  -1   1  -7   59.94    3.63
   2  -1   7 1573.26   41.71
  -2  -1  -7 1605.68   41.28
   2   1   7 1535.43   41.95
   2   1   7 1511.88   41.83
   2   1   7 1628.65   40.36
  -2   1  -7 1488.35   41.04
   3  -1   7  134.19    6.80
  -3  -1  -7  128.70    6.46
  -3   1  -7  130.31    6.41
   3   1   7  141.55    7.14
   3   1   7  155.76    5.83
  -4  -1  -7 1112.72   32.63
   4  -1   7 1154.81   33.37
   4   1   7 1131.34   33.44
  -4   1  -7 1127.63   32.43
  -5  -1  -7    0.55    1.32
   5  -1   7    1.46    1.51
   5   1   7    0.75    1.42
  -5   1  -7    0.11    1.30
  -6  -1  -7    0.22    1.62
   6  -1   7    0.04    1.51
  -6   1  -7    0.28    1.52
   6   1   7   -0.27    1.31
   7  -1   7   19.86    4.53
  -7  -1  -7   26.12    4.90
  -7   1  -7   25.47    4.63
   7   1   7   22.06    4.48
  -8  -1  -7  201.94   12.33
   8  -1   7  210.26   13.12
  -8   1  -7  193.22   11.85
   8   1   7  176.90   12.14
   9  -1   7    3.21    3.23
  -9  -1  -7    4.44    3.05
   9   1   7   -1.51    2.45
  -9  -2   7    8.22    4.11
   9  -2  -7   -0.03    2.89
  -8  -2   7   10.09    4.08
   8  -2  -7   15.12    4.92
   8   2  -7   16.73    4.92
   7  -2  -7  749.77   28.16
  -7  -2   7  726.01   27.54
  -7   2   7  717.18   26.09
   7   2  -7  690.23   26.67
   6  -2  -7    2.65    2.44
  -6  -2   7    2.06    2.14
   6   2  -7    5.26    2.87
  -6   2   7    2.70    2.11
  -5  -2   7  210.90   11.42
   5  -2  -7  204.44   11.18
   5   2  -7  209.83   10.85
  -5   2   7  213.74   10.54
   5   2  -7  214.06   12.00
  -4  -2   7 1135.65   35.49
   4  -2  -7 1121.78   35.07
  -4   2   7 1136.73   33.97
   4   2  -7 1221.52   36.52
   4   2  -7 1192.74   34.60
   3  -2  -7  397.53   14.78
  -3   2   7  395.80   14.03
   3   2  -7  387.13   15.54
   3   2  -7  401.01   14.35
   2  -2  -7  166.94    7.62
  -2  -2   7  159.26    7.83
   2   2  -7  163.35    7.23
   2   2  -7  162.02    8.24
  -2   2   7  159.82    7.15
  -1  -2   7 1460.90   40.82
   1  -2  -7 1500.79   40.05
   1  -2  -7 1436.02   40.52
  -1  -2   7 1502.72   41.35
  -1  -2   7 1526.97   40.34
   1   2  -7 1521.53   39.75
   1   2  -7 1512.13   38.23
   1   2  -7 1527.17   41.66
   0  -2  -7  843.10   21.47
   0  -2   7  860.23   25.14
   0  -2   7  849.54   21.30
   0  -2   7  826.61   23.63
   0  -2  -7  863.39   24.32
   0  -2   7  847.62   23.92
   0  -2  -7  836.51   23.20
   0   2  -7  823.52   23.33
   0   2   7  867.63   23.99
   0   2  -7  813.13   24.72
   1  -2   7 1327.20   35.91
  -1  -2  -7 1371.42   36.47
  -1  -2  -7 1317.57   35.47
   1  -2   7 1330.58   35.69
  -1  -2  -7 1350.58   37.22
   1   2   7 1407.02   36.22
  -1   2  -7 1361.73   35.91
   1   2   7 1356.03   34.24
   1   2   7 1335.16   36.53
   2  -2   7 1549.43   42.35
  -2  -2  -7 1564.81   42.05
  -2  -2  -7 1627.09   43.15
   2  -2   7 1606.93   41.97
  -2   2  -7 1609.86   42.13
   2   2   7 1567.44   43.04
   2   2   7 1635.34   42.35
   3  -2   7   33.44    3.77
  -3  -2  -7   38.36    3.44
  -3  -2  -7   26.66    3.26
   3   2   7   38.63    3.69
   3   2   7   29.77    3.79
  -3   2  -7   39.39    3.92
  -4  -2  -7   70.41    5.08
   4  -2   7   76.69    5.40
  -4  -2  -7   65.59    4.03
   4   2   7   60.88    5.80
  -4   2  -7   62.24    4.54
  -5  -2  -7   17.75    3.31
  -5  -2  -7   21.21    2.60
   5  -2   7   14.60    3.04
   5   2   7   10.88    2.88
  -5   2  -7   13.36    2.66
  -6  -2  -7   45.30    3.93
  -6  -2  -7   46.84    5.93
   6  -2   7   34.55    5.33
  -6   2  -7   45.75    5.42
   6   2   7   41.66    5.83
   7  -2   7   41.51    6.17
  -7  -2  -7   50.94    6.79
   7   2   7   54.93    7.11
  -7   2  -7   39.47    5.67
  -8  -2  -7    0.81    2.51
   8  -2   7    2.04    2.81
   8   2   7   -1.57    2.29
   9  -2   7    6.48    3.72
  -9  -2  -7    3.72    3.54
  -9  -3   7    0.97    3.14
   9  -3  -7   -1.33    2.47
   8  -3  -7   74.78    9.42
  -8  -3   7   62.73    8.88
  -7  -3   7   29.76    5.67
   7  -3  -7   40.82    6.68
   7   3  -7   34.76    6.00
  -6  -3   7   -1.15    1.47
   6  -3  -7    0.29    1.70
  -6   3   7    0.34    1.42
   6   3  -7    0.98    2.26
   6   3  -7   -2.11    1.52
   5  -3  -7   21.90    4.43
  -5  -3   7   12.07    3.46
  -5   3   7   15.22    3.16
   5   3  -7   14.55    3.89
   5   3  -7   11.44    2.94
  -4  -3   7  212.54   10.97
   4  -3  -7  219.02   10.74
  -4   3   7  216.49    9.38
   4   3  -7  183.87   11.28
   4   3  -7  214.04    9.97
   3  -3  -7  670.84   21.88
   3   3  -7  646.09   20.71
  -3   3   7  667.34   20.26
   3   3  -7  700.07   24.02
  -2  -3   7  702.64   22.95
   2  -3  -7  686.28   21.31
  -2  -3   7  654.45   21.24
   2   3  -7  724.47   23.72
   2   3  -7  692.48   20.32
   2   3  -7  693.14   20.58
  -1  -3   7  673.82   21.91
  -1  -3   7  681.14   20.24
   1  -3  -7  646.34   19.19
   1  -3  -7  632.40   19.72
  -1  -3   7  658.15   19.52
   1   3  -7  678.48   21.98
  -1   3   7  680.64   19.81
  -1   3   7  564.14   17.94
   0  -3  -7   76.00    3.83
   0  -3  -7   75.44    4.45
   0  -3   7   77.80    4.22
   0  -3   7   73.06    4.18
   0  -3   7   80.33    6.80
   0  -3  -7   71.42    3.62
   0  -3   7   76.97    3.65
   0   3  -7   84.76    5.65
   0   3  -7   77.99    3.53
   0   3   7   74.10    4.57
  -1  -3  -7   -0.13    0.51
   1  -3   7    1.05    0.78
  -1  -3  -7    1.98    0.99
  -1  -3  -7    0.91    0.67
   1  -3   7    2.46    1.48
   1  -3   7   -0.20    0.58
  -1  -3  -7    0.01    0.84
  -1  -3  -7    0.07    0.82
  -1   3  -7    1.06    0.72
   1   3   7   -0.01    0.37
   1   3   7   -0.82    0.61
   1   3   7    0.01    0.63
  -2  -3  -7 1105.24   30.72
  -2  -3  -7 1102.79   30.06
   2  -3   7 1071.70   30.14
  -2  -3  -7 1062.95   30.56
  -2  -3  -7 1152.72   32.45
   2  -3   7 1088.98   29.89
   2   3   7 1101.99   31.35
   2   3   7 1084.33   30.91
   2   3   7 1093.18   30.32
   3  -3   7  979.92   26.27
  -3  -3  -7 1003.22   29.62
   3  -3   7 1005.78   28.64
  -3  -3  -7  957.75   28.25
  -3  -3  -7  972.98   28.24
   3   3   7  984.25   28.97
  -3   3  -7 1004.75   27.90
   3   3   7  997.43   28.79
   3   3   7  964.38   29.05
  -4  -3  -7   88.07    5.86
   4  -3   7   98.69    6.25
  -4  -3  -7   96.82    5.57
  -4   3  -7   99.64    5.67
   4   3   7   99.22    6.48
  -5  -3  -7    8.65    2.46
  -5  -3  -7    7.53    2.01
   5  -3   7    5.14    2.15
   5   3   7    8.12    2.54
  -5   3  -7   10.64    2.60
   6  -3   7   13.37    3.43
  -6  -3  -7   13.40    3.21
  -6  -3  -7   12.74    2.60
  -6   3  -7   13.92    3.24
   6   3   7   13.36    3.59
  -7  -3  -7   22.03    4.63
   7  -3   7   11.68    3.64
   7   3   7   16.87    4.28
   8  -3   7  196.93   12.79
  -8  -3  -7  175.50   11.85
   9  -3   7   23.46    6.09
  -9  -3  -7   22.78    5.54
  -8  -4   7  165.49   14.80
   8  -4  -7  136.08   13.29
  -7  -4   7  469.79   21.11
   7  -4  -7  444.64   20.61
   6  -4  -7   19.36    4.58
  -6  -4   7    8.89    3.29
  -6   4   7   10.77    2.71
   6   4  -7    7.38    3.60
  -5  -4   7  104.97    9.52
   5  -4  -7   78.93    7.98
  -5   4   7   98.13    6.16
   5   4  -7  100.84   10.86
   5   4  -7   92.92    6.64
  -5   4   7   91.76    6.03
   4  -4  -7  668.96   23.25
  -4  -4   7  711.84   24.31
  -4   4   7  589.34   20.16
   4   4  -7  705.84   26.48
   4   4  -7  727.13   22.02
  -4   4   7  710.26   21.82
  -3  -4   7    0.82    1.29
   3  -4  -7    1.58    1.36
  -3   4   7    2.30    1.29
   3   4  -7    3.64    1.25
  -3   4   7    1.85    0.92
   3   4  -7    1.77    1.73
   2  -4  -7  513.68   17.18
  -2  -4   7  503.29   17.25
   2   4  -7  543.70   20.51
  -2   4   7  531.71   17.67
  -2   4   7  535.94   14.55
   2   4  -7  530.91   15.47
   1  -4  -7  204.73    8.51
   1  -4  -7  218.82    8.18
  -1  -4   7  193.79    8.13
  -1  -4   7  212.82    8.00
  -1  -4   7  202.89   10.67
  -1  -4   7  209.27    8.80
   1   4  -7  195.21    6.20
  -1   4   7  213.35    9.28
   1   4  -7  200.88   10.61
   0  -4  -7 1394.26   38.06
   0  -4   7 1350.48   37.73
   0  -4   7 1370.15   37.51
   0  -4   7 1412.46   37.52
   0  -4  -7 1437.08   38.15
   0  -4  -7 1451.35   36.88
   0  -4   7 1368.26   41.55
   0   4   7 1459.46   39.78
   1  -4   7   88.40    4.39
  -1  -4  -7   92.17    5.48
  -1  -4  -7   79.04    7.23
  -1  -4  -7   81.97    4.74
  -1  -4  -7   86.04    4.22
   1  -4   7   87.63    7.78
  -1  -4  -7   93.11    4.85
   1  -4   7   82.19    4.36
   1   4   7   90.30    4.80
   1   4   7   78.09    5.45
  -2  -4  -7   34.28    4.81
  -2  -4  -7   28.65    3.45
   2  -4   7   39.49    3.50
  -2  -4  -7   34.78    3.46
   2  -4   7   42.58    3.77
  -2  -4  -7   31.86    3.86
   2   4   7   29.77    3.96
   2   4   7   32.30    3.79
   2   4   7   35.73    3.65
  -2   4  -7   35.25    2.31
   3  -4   7  430.21   14.65
  -3  -4  -7  426.11   14.58
   3  -4   7  416.45   14.16
   3  -4   7  424.06   13.62
  -3  -4  -7  432.18   15.37
  -3  -4  -7  408.22   16.13
  -3   4  -7  434.86   13.69
   3   4   7  438.09   15.82
   3   4   7  425.67   15.03
   4  -4   7   16.48    3.07
  -4  -4  -7   16.39    3.04
  -4  -4  -7   16.08    3.05
   4  -4   7   15.75    1.91
   4   4   7   16.35    3.30
   4   4   7   14.30    3.07
  -4   4  -7    6.93    1.77
   5  -4   7  327.74   13.94
  -5  -4  -7  318.41   12.95
  -5  -4  -7  337.91   13.87
   5   4   7  311.64   14.56
  -5   4  -7  291.75   12.99
   5   4   7  320.83   13.90
  -6  -4  -7   59.70    7.04
   6  -4   7   69.61    7.49
  -6  -4  -7   58.42    6.01
   6   4   7   59.53    7.36
  -7  -4  -7  348.93   16.29
   7  -4   7  344.17   16.56
   7   4   7  321.23   17.17
   8  -4   7   16.50    4.74
  -8  -4  -7   18.69    4.93
   8  -5  -7   87.05   10.91
  -8  -5   7  122.95   13.06
   7  -5  -7   40.85    6.91
  -7  -5   7   38.95    6.70
   6  -5  -7    7.67    3.01
  -6  -5   7    8.15    3.57
  -6   5   7    8.86    2.69
  -5  -5   7  152.15   10.12
   5  -5  -7  160.82    9.99
  -5   5   7  172.17    9.02
   5   5  -7  115.40   12.09
  -4  -5   7    1.31    1.73
   4  -5  -7    2.41    1.81
   4   5  -7    1.06    2.03
  -4   5   7    2.00    1.57
  -3  -5   7  227.49   12.28
  -3  -5   7  210.89   10.31
   3  -5  -7  217.46   10.24
   3   5  -7  213.26   12.88
   3   5  -7  222.73    8.08
  -3   5   7  247.59   10.82
   2  -5  -7    8.28    2.09
  -2  -5   7    6.09    1.73
  -2  -5   7    5.15    1.74
  -2  -5   7    4.35    2.48
  -2   5   7    2.32    1.47
   2   5  -7    5.22    2.41
   1  -5  -7   62.26    5.71
  -1  -5   7   64.04    4.17
  -1  -5   7   66.49    4.59
  -1  -5   7   63.05    4.46
   1  -5  -7   58.68    4.13
  -1  -5   7   62.67    7.05
   1  -5  -7   63.44    3.94
   1   5  -7   59.60    6.67
  -1   5   7   73.20    6.66
   0  -5   7   71.11    4.12
   0  -5   7   74.15    4.24
   0  -5   7   65.52    4.74
   0  -5   7   57.15    6.76
   0  -5  -7   66.21    3.62
   0  -5  -7   72.75    4.45
   0  -5  -7   69.46    5.00
   0  -5  -7   70.71    5.17
   0   5   7   77.64    7.02
  -1  -5  -7  483.62   15.87
  -1  -5  -7  487.84   17.50
  -1  -5  -7  497.45   15.00
  -1  -5  -7  494.82   19.57
   1  -5   7  530.43   20.51
   1  -5   7  517.91   15.38
   1  -5   7  503.77   15.16
  -1  -5  -7  499.96   16.92
   1   5   7  506.03   18.51
  -2  -5  -7  213.96   11.33
   2  -5   7  206.37    8.10
  -2  -5  -7  213.37    8.90
  -2  -5  -7  228.06    8.61
   2  -5   7  206.03    9.50
   2  -5   7  224.47    8.48
  -2  -5  -7  202.79    9.96
   2   5   7  224.33   10.12
   2   5   7  237.82   11.24
  -3  -5  -7  520.77   18.80
   3  -5   7  489.98   16.58
   3  -5   7  544.58   17.33
  -3  -5  -7  541.40   17.98
  -3  -5  -7  524.05   17.27
  -3  -5  -7  562.89   20.35
   3  -5   7  514.69   17.13
   3   5   7  515.46   16.88
   3   5   7  528.26   19.28
  -4  -5  -7   56.84    5.68
   4  -5   7   67.56    4.12
  -4  -5  -7   70.22    6.70
  -4  -5  -7   48.51    6.06
   4  -5   7   60.49    5.72
   4   5   7   61.84    7.15
   5  -5   7    9.77    2.87
  -5  -5  -7   11.71    3.07
   5   5   7   10.98    3.47
  -6  -5  -7   20.72    4.22
   6  -5   7   16.53    3.83
   6   5   7   19.45    4.75
   7  -5   7   31.44    5.59
  -7  -5  -7   33.80    5.81
  -8  -5  -7    1.01    2.46
   8  -5   7    1.93    2.51
  -7  -6   7   65.34    8.68
   7  -6  -7   64.66    8.48
  -6  -6   7   85.95    9.65
   6  -6  -7   79.07    8.75
  -6   6   7   90.06    8.26
   5  -6  -7  224.57   12.44
  -5  -6   7  244.27   13.29
  -5   6   7  260.96   12.44
   4  -6  -7  495.46   18.83
  -4  -6   7  502.34   19.84
   4   6  -7  477.47   22.96
  -4   6   7  508.54   19.15
   3  -6  -7   17.92    3.30
  -3  -6   7   15.96    3.96
   3   6  -7   25.78    5.59
  -3   6   7   21.80    4.16
   2  -6  -7   18.51    2.94
  -2  -6   7   19.68    3.24
  -2  -6   7   17.28    3.10
  -2  -6   7   20.37    4.61
   2   6  -7   13.37    3.88
  -2   6   7   25.55    4.48
  -1  -6   7   94.56    6.23
  -1  -6   7   93.28    5.75
  -1  -6   7  100.54    5.48
  -1  -6   7  100.09   10.06
   1  -6  -7   93.19    6.77
   1  -6  -7   93.51    5.48
   1  -6  -7  102.00    5.23
   1   6  -7  122.37   11.02
  -1   6   7  101.92    7.27
   0  -6  -7   35.42    3.11
   0  -6  -7   35.67    4.59
   0  -6   7   43.23    3.82
   0  -6   7   48.12    5.60
   0  -6  -7   31.62    4.46
   0  -6   7   41.24    3.80
   0  -6  -7   39.82    3.97
   0  -6   7   32.31    5.84
   0   6   7   32.05    4.97
   1  -6   7   11.08    1.92
  -1  -6  -7   11.90    2.72
   1  -6   7   11.83    3.61
  -1  -6  -7   10.61    1.82
  -1  -6  -7    8.90    2.11
   1  -6   7    8.10    2.55
  -1  -6  -7    9.45    3.35
   1  -6   7   10.88    1.92
  -1  -6  -7    8.41    2.77
   1   6   7    6.65    2.74
  -2  -6  -7    5.63    2.69
   2  -6   7    7.10    1.70
  -2  -6  -7    3.01    1.45
   2  -6   7   12.67    4.18
  -2  -6  -7    7.68    2.34
   2  -6   7    5.59    2.51
   2  -6   7    5.96    1.67
  -2  -6  -7    5.76    1.88
   2   6   7    5.76    2.20
   2   6   7    3.27    2.20
  -3  -6  -7  490.35   16.83
   3  -6   7  499.86   16.81
   3  -6   7  497.76   17.59
  -3  -6  -7  513.87   20.50
   3   6   7  535.02   20.07
  -4  -6  -7   90.27    6.23
   4  -6   7   81.50    5.25
   4  -6   7   82.34    5.89
  -4  -6  -7   83.89    8.67
   4   6   7   91.90    8.98
  -5  -6  -7   93.25    8.21
   5  -6   7  107.09    7.38
   5   6   7   89.02    9.80
  -6  -6  -7  181.23   10.77
   6  -6   7  166.31   10.37
   6   6   7  176.55   12.77
  -7  -6  -7  329.87   16.14
   7  -6   7  301.09   15.84
   7  -7  -7  211.17   13.75
  -7  -7   7  211.23   13.87
  -6  -7   7   64.60    8.31
   6  -7  -7   58.51    7.88
   5  -7  -7   15.82    4.20
  -5  -7   7   11.48    3.73
  -5   7   7    4.91    2.49
  -4  -7   7  202.57   11.50
   4  -7  -7  205.66   10.88
  -4   7   7  206.37   11.68
  -3  -7   7   79.58    7.55
   3  -7  -7   76.02    6.81
  -3   7   7   67.33    7.64
   3   7  -7   50.84    8.09
  -2  -7   7   80.87    6.19
  -2  -7   7   96.81   11.59
   2  -7  -7   76.72    8.28
   2  -7  -7   79.29    5.33
  -2   7   7   75.04    8.31
   2   7  -7   78.76    9.76
   1  -7  -7    3.39    1.69
   1  -7  -7    5.40    1.67
  -1  -7   7    2.92    1.54
   1  -7  -7    6.13    2.51
  -1  -7   7    4.86    1.70
  -1  -7   7    5.97    2.40
  -1  -7   7    3.25    2.71
  -1   7   7    3.24    2.26
   0  -7  -7   28.04    2.88
   0  -7   7   49.15    7.46
   0  -7   7   27.44    4.50
   0  -7   7   26.01    3.13
   0  -7  -7   32.28    5.02
   0  -7   7   37.07    3.87
   0  -7  -7   31.96    3.66
   0   7   7   33.41    5.55
  -1  -7  -7  428.34   17.30
   1  -7   7  426.88   13.73
   1  -7   7  445.50   21.05
  -1  -7  -7  429.42   14.32
  -1  -7  -7  408.69   19.49
  -1  -7  -7  445.92   13.61
   1  -7   7  408.20   13.50
   1   7   7  413.02   18.36
   2  -7   7    5.18    1.64
  -2  -7  -7    3.53    2.52
  -2  -7  -7    5.77    1.73
   2  -7   7    6.60    2.75
  -2  -7  -7    3.57    2.36
   3  -7   7  135.67    8.35
  -3  -7  -7  160.46   10.85
  -3  -7  -7  147.93    7.65
   3  -7   7  140.44    7.22
   3   7   7  161.35   10.26
  -4  -7  -7   17.18    4.23
  -4  -7  -7    9.62    2.67
   4  -7   7    8.77    2.44
   4   7   7   12.60    3.71
   5  -7   7    1.95    1.88
  -5  -7  -7    1.80    2.05
   5   7   7    2.94    2.80
  -6  -7  -7    1.10    1.99
   6  -7   7    4.43    2.66
   6   7   7    1.31    2.96
  -7  -7  -7    8.31    3.55
   7  -7   7    8.15    3.67
   6  -8  -7  485.12   20.82
  -6  -8   7  416.95   20.34
  -5  -8   7   42.13    6.74
   5  -8  -7   52.75    6.80
  -5   8   7   45.22    7.00
  -4  -8   7  273.73   13.73
   4  -8  -7  253.73   12.74
  -4   8   7  289.27   14.96
   3  -8  -7   49.72    7.58
   3  -8  -7   44.65    5.48
  -3  -8   7   46.55    6.08
  -3   8   7   62.25    8.25
   2  -8  -7    8.11    3.45
  -2  -8   7    9.91    3.13
   2  -8  -7   10.06    2.57
  -2   8   7    9.91    3.53
   1  -8  -7  152.97   10.33
  -1  -8   7  136.85    9.07
  -1  -8   7  134.76    7.55
   1  -8  -7  138.78    6.74
  -1   8   7  149.34   10.49
   0  -8  -7  139.53    6.10
   0  -8   7  121.45    6.53
   0  -8   7  131.69    9.07
   0  -8  -7  127.69    9.29
   0   8   7  123.27   11.20
  -1  -8  -7  104.26   11.19
   1  -8   7  127.28    6.19
  -1  -8  -7  127.78    5.96
  -1  -8  -7  124.54    9.06
  -2  -8  -7  480.84   21.93
  -2  -8  -7  459.91   19.19
  -2  -8  -7  472.99   15.59
   2  -8   7  457.57   15.20
   3  -8   7  189.08    8.61
  -3  -8  -7  167.00    8.51
  -3  -8  -7  189.52   12.59
   3   8   7  172.02   11.37
  -4  -8  -7   -0.03    2.41
  -4  -8  -7   -1.27    1.35
   4  -8   7   -2.29    1.16
   4   8   7   -0.26    2.47
  -5  -8  -7    0.14    1.90
   5  -8   7   -0.60    1.66
   6  -8   7   -2.75    1.60
  -6  -8  -7   -1.32    1.69
   5  -9  -7  137.63    9.64
  -5  -9   7  130.81   11.77
   4  -9  -7   65.65    7.06
  -4  -9   7   76.63    8.16
  -4   9   7   60.76    8.44
  -3  -9   7   55.22    6.71
   3  -9  -7   64.20    6.39
  -3   9   7   62.84    8.67
   2  -9  -7    1.63    1.59
  -2  -9   7   -1.18    1.73
  -2   9   7   -2.26    2.22
   1  -9  -7   33.53    6.12
   1  -9  -7   26.05    3.46
  -1  -9   7   40.52    6.33
   0  -9  -7    0.64    1.21
   0  -9   7   -0.41    1.37
   0  -9  -7    1.78    2.63
   0  -9  -7    3.22    2.61
   0  -9   7   -0.46    2.10
  -1  -9  -7   23.36    5.44
  -1  -9  -7   24.99    6.50
  -1  -9  -7   25.01    3.02
   1  -9   7   17.37    4.58
   1  -9   7   21.99    3.17
  -2  -9  -7    0.60    2.73
   2  -9   7    1.14    1.31
  -2  -9  -7    1.16    1.45
  -3  -9  -7   79.67   10.17
   3  -9   7   67.23    5.89
  -3  -9  -7   65.61    6.19
   4  -9   7    8.26    2.76
  -4  -9  -7   11.38    4.66
  -4  -9  -7   10.05    2.91
  -5  -9  -7   79.38    8.07
   5  -9   7   70.01    7.31
  -3 -10   7    4.45    2.44
   3 -10  -7    5.77    2.52
   2 -10  -7   17.08    3.16
  -2 -10   7   17.67    4.56
  -2 -10   7   22.12    4.09
  -1 -10   7    8.16    3.66
   1 -10  -7   16.48    2.90
   0 -10   7   58.20    5.44
   0 -10  -7   58.64   10.07
   0 -10  -7   65.34    4.54
   0 -10   7   65.85    8.80
  -1 -10  -7    3.82    1.66
  -1 -10  -7    6.91    4.39
   1 -10   7    3.29    3.03
   1 -10   7    2.10    1.69
  -2 -10  -7  127.35   14.24
  -2 -10  -7  126.87    6.95
   2 -10   7  125.49    6.90
   3 -10   7   57.49    5.61
  -3 -10  -7   42.70    7.95
  -3 -10  -7   54.59    5.72
   9   0  -8   -3.03    2.62
  -9   0   8    1.39    3.05
  -8   0   8   37.57    6.76
   8   0  -8   34.89    6.43
   7   0  -8   -0.25    1.97
  -7   0   8   -2.24    1.78
   6   0  -8  134.73    9.41
  -6   0   8  129.35    9.14
  -5   0   8    1.38    1.83
   5   0  -8   -0.88    1.54
   4   0  -8    8.37    2.68
  -4   0   8    3.20    1.84
   3   0  -8    1.29    1.34
  -3   0   8   -0.72    1.06
   2   0  -8  130.02    6.77
   1   0  -8    0.07    0.76
   1   0  -8    0.19    0.54
  -1   0   8    0.42    0.90
   0   0  -8 2078.09   53.12
   0   0   8 2100.01   53.16
   0   0   8 2163.37   55.53
   0   0  -8 2076.35   54.70
   1   0   8   -1.95    0.62
   1   0   8   -2.14    0.39
  -1   0  -8   -1.44    0.48
  -1   0  -8   -1.42    0.67
   2   0   8  785.50   22.14
  -2   0  -8  787.54   22.73
   2   0   8  793.63   23.43
   3   0   8   -0.44    0.88
  -3   0  -8    0.21    0.85
   3   0   8   -0.31    0.47
   4   0   8  762.06   24.33
  -4   0  -8  757.50   23.53
  -5   0  -8    9.37    2.75
  -6   0  -8   21.10    4.06
   6   0   8   14.37    3.58
  -7   0  -8   -1.21    1.50
   7   0   8    1.99    2.22
  -8   0  -8    5.03    3.27
   8   0   8    7.83    3.78
   9   0   8   -0.34    2.58
  -9   0  -8   -2.03    2.54
   9  -1  -8  190.52   16.40
  -9  -1   8  200.95   13.94
   9   1  -8  179.74   15.87
  -8  -1   8   -1.26    2.19
   8  -1  -8   -0.15    2.58
   8   1  -8    0.99    2.57
  -8   1   8   -0.49    2.15
  -7  -1   8   91.67    9.83
   7  -1  -8   91.19    9.95
  -7   1   8   79.80    8.82
   7   1  -8   88.11    9.69
  -6  -1   8  536.44   21.50
   6  -1  -8  522.78   21.41
   6   1  -8  528.75   21.17
  -6   1   8  540.38   20.78
  -5  -1   8   60.13    6.93
   5  -1  -8   34.06    4.95
  -5   1   8   49.30    5.79
   5   1  -8   58.96    6.79
   4  -1  -8  324.54   13.92
  -4  -1   8  328.55   14.21
  -4   1   8  309.80   13.36
   4   1  -8  331.06   13.71
   3  -1  -8 9917.63  244.70
  -3   1   8 9646.67  244.40
   3   1  -8 9781.81  244.58
   3   1  -8 9999.00  244.52
   2  -1  -8  738.40   22.47
   2   1  -8  739.83   22.50
   2   1  -8  695.08   22.02
  -1  -1   8  112.65    6.23
  -1  -1   8  121.53    5.78
   1  -1  -8  108.20    5.73
   1   1  -8  112.41    5.74
   1   1  -8  127.31    6.07
   0  -1   8  123.54    5.83
   0  -1  -8  127.67    5.81
   0  -1  -8  130.76    6.35
   0  -1   8  122.01    6.15
   0  -1   8  132.03    5.97
   0  -1  -8  120.79    3.82
   0   1   8  138.53    6.51
   0   1  -8  125.75    5.77
   0   1  -8  131.55    5.99
   1  -1   8  564.03   17.64
  -1  -1  -8  566.83   17.03
  -1  -1  -8  587.58   17.12
   1  -1   8  585.33   15.18
   1   1   8  568.13   17.97
  -1   1  -8  573.67   17.32
  -2  -1  -8  457.27   13.78
   2  -1   8  404.78   14.08
  -2  -1  -8  418.69   13.76
  -2   1  -8  413.22   13.77
   2   1   8  442.88   12.96
   2   1   8  412.20   14.26
   2   1   8  446.03   14.77
   3  -1   8  609.09   19.17
  -3  -1  -8  605.73   18.55
  -3   1  -8  567.09   18.19
   3   1   8  579.42   16.94
   3   1   8  569.66   19.07
  -4  -1  -8   84.59    5.67
   4  -1   8   97.73    6.26
   4   1   8   87.21    6.03
  -4   1  -8   83.32    5.46
   5  -1   8    4.61    2.04
  -5  -1  -8    5.34    2.25
   5   1   8    6.04    2.48
  -5   1  -8    3.48    1.95
   6  -1   8    1.86    2.03
  -6  -1  -8    3.45    2.29
   6   1   8    3.55    2.43
  -6   1  -8    2.74    1.93
   7  -1   8   79.49    8.75
  -7  -1  -8   87.41    8.81
  -7   1  -8   83.55    8.17
   7   1   8   86.97    9.04
   8  -1   8   17.24    4.75
  -8  -1  -8   22.70    5.30
  -8   1  -8   25.22    5.13
   8   1   8   24.54    5.57
  -9  -1  -8   30.65    6.44
   9  -1   8   35.80    6.86
   9   1   8   34.25    7.10
   9  -2  -8   49.80    8.48
  -9  -2   8   53.40    8.76
  -8  -2   8    5.80    3.60
   8  -2  -8   -0.92    2.24
   8   2  -8   -2.92    2.08
  -7  -2   8   10.45    4.13
   7  -2  -8    7.07    3.40
   7   2  -8    8.44    3.63
  -7   2   8    7.40    3.17
   6  -2  -8   68.27    8.16
  -6  -2   8   76.56    8.64
   6   2  -8   72.06    7.84
   6   2  -8   55.44    7.64
  -6   2   8   54.45    6.63
   5  -2  -8    6.68    2.82
  -5  -2   8   15.41    3.79
  -5   2   8   12.78    2.95
   5   2  -8    7.95    2.97
   5   2  -8   12.93    3.43
   4  -2  -8  342.97   14.56
  -4  -2   8  356.20   15.11
   4   2  -8  334.16   13.91
   4   2  -8  358.84   15.51
  -4   2   8  345.06   13.76
   3  -2  -8  273.73   11.67
  -3   2   8  283.63   11.21
   3   2  -8  270.05   12.31
   3   2  -8  256.22   10.98
   2  -2  -8  378.00   13.93
  -2  -2   8  406.82   14.47
   2   2  -8  383.62   14.89
   2   2  -8  395.66   13.67
  -2   2   8  391.88   13.65
  -1  -2   8  344.45   13.00
  -1  -2   8  347.86   12.35
   1  -2  -8  352.98   12.82
   1  -2  -8  355.77   12.25
  -1  -2   8  350.89   12.92
   1   2  -8  355.10   12.02
   1   2  -8  352.80   13.26
   1   2  -8  350.87   10.18
   0  -2  -8  115.46    5.23
   0  -2   8  110.60    5.41
   0  -2   8  107.01    5.55
   0  -2  -8  112.57    5.84
   0  -2   8  106.01    6.02
   0   2   8   99.73    5.43
   0   2  -8   97.24    5.71
   0   2  -8  107.01    5.20
   1  -2   8  143.81    6.39
  -1  -2  -8  143.16    6.96
  -1  -2  -8  138.49    5.95
   1  -2   8  132.25    6.92
   1  -2   8  131.23    5.95
  -1  -2  -8  142.96    6.59
   1   2   8  145.94    6.81
   1   2   8  143.79    4.56
  -1   2  -8  134.88    6.16
   1   2   8  158.36    6.40
   2  -2   8    0.53    0.83
  -2  -2  -8    1.29    1.12
  -2  -2  -8    0.76    0.94
  -2   2  -8    0.72    0.80
   2   2   8    0.99    0.96
   2   2   8    0.87    1.10
  -3  -2  -8 1804.91   47.58
   3  -2   8 1725.96   47.76
   3   2   8 1814.49   48.57
   3   2   8 1777.08   46.93
  -3   2  -8 1710.93   47.06
  -4  -2  -8    4.89    1.84
   4  -2   8    4.10    1.72
   4   2   8    2.79    1.68
  -4   2  -8    8.59    2.24
  -5  -2  -8  270.62   12.02
  -5  -2  -8  254.78    9.56
   5  -2   8  267.67   12.43
   5   2   8  277.95   12.65
  -5   2  -8  291.74   11.97
   6  -2   8    1.48    1.87
  -6  -2  -8   -2.10    1.16
  -6   2  -8    1.41    1.96
   6   2   8   -0.36    1.91
   7  -2   8   -0.79    1.57
  -7  -2  -8    0.50    1.91
  -7   2  -8   -1.49    1.68
   7   2   8   -1.12    1.90
   8  -2   8    3.26    2.81
  -8  -2  -8    6.56    3.42
   8   2   8    1.84    2.67
   9  -2   8  119.18   12.66
  -9  -2  -8  120.95   11.90
   9  -3  -8   76.19   10.46
  -9  -3   8  129.37   13.89
   8  -3  -8  166.78   14.82
  -8  -3   8  150.36   14.03
   7  -3  -8  128.82   11.91
  -7  -3   8  144.82   13.03
   7   3  -8  149.85   10.46
  -6  -3   8  125.95   11.14
   6  -3  -8  145.78   10.16
   6   3  -8  142.38   12.69
   6   3  -8  144.81    9.42
  -6   3   8  150.43    8.93
  -5  -3   8 1709.36   51.15
   5  -3  -8 1797.49   51.11
   5   3  -8 1643.06   52.61
  -5   3   8 1708.49   48.54
   5   3  -8 1740.17   49.57
   4  -3  -8  104.16    7.21
  -4  -3   8  113.91    7.83
  -4   3   8  104.58    6.19
   4   3  -8   92.48    8.83
   4   3  -8   94.83    6.41
   3  -3  -8   16.82    3.11
  -3   3   8   26.32    3.36
   3   3  -8   21.35    3.24
   3   3  -8   21.67    4.21
   2  -3  -8   11.57    2.39
  -2  -3   8   11.45    2.49
  -2  -3   8   11.59    2.67
   2   3  -8   19.51    2.63
  -2   3   8   17.29    2.48
   2   3  -8   16.00    3.25
   2   3  -8   14.89    2.35
   1  -3  -8  224.68    9.27
  -1  -3   8  213.91    9.25
  -1  -3   8  237.57   10.73
  -1  -3   8  203.27    8.68
   1  -3  -8  205.59    8.48
  -1   3   8  210.95    8.70
   1   3  -8  210.18   10.32
   0  -3   8  103.24    5.30
   0  -3   8  102.90    5.46
   0  -3   8  104.84    6.71
   0  -3   8  104.39    4.22
   0  -3  -8  109.87    5.08
   0  -3  -8  109.36    5.81
   0  -3  -8  108.31    4.41
   0   3  -8  103.17    6.45
   0   3   8  105.86    5.69
   1  -3   8   99.43    6.41
  -1  -3  -8   96.29    6.23
  -1  -3  -8   88.40    4.53
   1  -3   8   91.34    4.84
   1  -3   8   91.46    4.75
  -1  -3  -8   91.88    5.21
   1   3   8   81.32    4.87
   1   3   8   99.55    4.15
   1   3   8   99.96    5.54
   2  -3   8  571.94   17.08
  -2  -3  -8  532.58   17.58
  -2  -3  -8  574.48   17.58
  -2  -3  -8  544.67   17.05
   2  -3   8  564.71   17.44
  -2  -3  -8  552.18   18.89
   2   3   8  585.74   18.27
  -2   3  -8  507.25   16.80
   2   3   8  581.44   18.33
   2   3   8  569.74   16.95
   3  -3   8  451.00   13.47
  -3  -3  -8  425.36   14.80
  -3  -3  -8  449.43   16.25
  -3  -3  -8  455.80   15.29
   3  -3   8  454.07   15.48
   3   3   8  461.56   16.23
   3   3   8  451.90   15.29
   3   3   8  478.81   15.98
  -3   3  -8  451.09   14.93
  -4  -3  -8  365.58   13.11
  -4  -3  -8  380.23   14.19
   4  -3   8  370.91   14.36
  -4   3  -8  378.88   13.53
   4   3   8  365.68   14.68
  -5  -3  -8    0.14    1.52
  -5  -3  -8    0.41    1.16
   5  -3   8    0.15    1.37
  -5   3  -8   -0.39    1.32
   5   3   8   -0.81    1.37
  -6  -3  -8  156.07    9.58
   6  -3   8  163.72    9.97
  -6  -3  -8  162.65    7.79
   6   3   8  156.41    9.94
  -6   3  -8  161.09    9.00
   7  -3   8    1.22    2.38
  -7  -3  -8    0.88    2.17
   7   3   8   -0.34    2.18
   8  -3   8    0.29    2.35
  -8  -3  -8    0.16    2.35
  -9  -3  -8   50.34    7.93
   9  -3   8   47.25    8.09
  -8  -4   8    9.11    4.10
   8  -4  -8   11.21    4.44
   7  -4  -8  302.70   16.59
  -7  -4   8  329.15   17.23
  -6  -4   8  587.45   24.09
   6  -4  -8  621.45   24.14
  -6   4   8  598.34   20.25
   5  -4  -8    3.53    2.36
  -5  -4   8    5.06    2.75
   5   4  -8    7.17    2.54
   5   4  -8    2.12    2.56
  -5   4   8    3.64    2.40
  -5   4   8    4.56    1.93
   4  -4  -8  110.40    7.60
  -4  -4   8  107.66    7.85
   4   4  -8  117.69    6.77
  -4   4   8  108.14    5.95
   4   4  -8   90.64    9.47
  -4   4   8  103.19    6.28
  -3  -4   8   30.80    4.94
   3  -4  -8   41.81    4.93
   3   4  -8   36.64    3.96
  -3   4   8   40.64    4.42
   3   4  -8   46.69    6.70
   2  -4  -8   66.65    4.79
  -2  -4   8   52.13    5.97
  -2  -4   8   65.79    5.92
   2   4  -8   57.98    3.60
  -2   4   8   67.30    4.88
   2   4  -8   67.62    7.22
  -2   4   8   75.45    3.56
   1  -4  -8   10.68    2.10
   1  -4  -8    7.28    1.99
  -1  -4   8    5.44    2.22
  -1  -4   8    9.23    2.05
  -1  -4   8   10.72    2.35
  -1  -4   8   12.39    1.97
  -1   4   8   10.18    1.22
   1   4  -8   11.41    2.99
   1   4  -8   12.10    1.53
  -1   4   8    7.17    2.04
   0  -4   8    0.78    1.31
   0  -4   8    2.11    1.10
   0  -4  -8   -0.29    0.57
   0  -4  -8   -0.59    0.89
   0  -4   8   -0.37    0.84
   0  -4   8    1.88    0.96
   0  -4  -8    1.48    0.92
   0   4   8    1.28    0.64
   0   4   8    1.28    1.16
  -1  -4  -8 1246.49   35.65
  -1  -4  -8 1268.69   33.93
  -1  -4  -8 1254.76   34.00
   1  -4   8 1309.66   34.45
  -1  -4  -8 1188.90   37.67
  -1  -4  -8 1296.88   35.18
   1  -4   8 1241.92   34.29
   1  -4   8 1313.91   38.82
   1   4   8 1253.00   33.63
   1   4   8 1286.10   36.68
  -2  -4  -8 1304.71   37.34
  -2  -4  -8 1365.76   36.82
  -2  -4  -8 1338.12   38.06
   2  -4   8 1404.01   37.10
  -2  -4  -8 1352.75   40.11
   2  -4   8 1378.39   36.68
  -2   4  -8 1343.05   35.67
   2   4   8 1367.12   39.15
   2   4   8 1350.96   37.51
  -3  -4  -8   14.47    3.25
  -3  -4  -8   16.68    3.05
   3  -4   8   12.37    2.52
   3  -4   8   12.55    2.19
   3  -4   8   13.49    2.50
  -3  -4  -8   15.14    2.67
   3   4   8   12.10    2.62
   3   4   8   13.96    3.11
  -3   4  -8   17.24    2.59
   3   4   8   14.55    2.80
  -4  -4  -8   -1.16    0.95
   4  -4   8   -0.38    1.09
  -4  -4  -8   -1.02    1.03
   4  -4   8   -0.25    0.70
   4   4   8   -1.91    1.11
  -4   4  -8    0.79    1.15
   4   4   8   -0.37    1.09
  -5  -4  -8   20.31    3.50
  -5  -4  -8   18.92    3.62
   5  -4   8   25.32    4.26
   5   4   8   23.92    4.20
   5   4   8   20.86    4.09
  -6  -4  -8    0.02    1.52
   6  -4   8    0.59    1.71
  -6  -4  -8   -1.44    1.36
   6   4   8    0.31    1.78
   7  -4   8    4.89    2.93
  -7  -4  -8    3.65    2.65
   7   4   8    4.16    2.78
  -8  -4  -8   39.17    6.73
   8  -4   8   36.00    6.59
  -8  -5   8  277.04   16.86
   8  -5  -8  270.25   16.66
   7  -5  -8   39.09    6.85
  -7  -5   8   54.30    8.09
   6  -5  -8   48.80    6.99
  -6  -5   8   54.35    7.58
  -6   5   8   52.65    5.76
  -5  -5   8   54.45    7.31
   5  -5  -8   47.59    6.39
  -5   5   8   50.45    5.66
   5   5  -8   54.40    8.66
   4  -5  -8  129.77    8.27
  -4  -5   8  122.46    8.57
  -4   5   8  107.93    7.14
   4   5  -8   94.53   10.66
  -3  -5   8   21.25    3.83
  -3  -5   8   36.40    5.99
   3  -5  -8   32.25    4.55
  -3   5   8   28.73    4.00
   3   5  -8   26.37    5.21
   3   5  -8   31.11    3.10
   2  -5  -8   17.17    2.94
  -2  -5   8   11.72    3.46
  -2  -5   8    9.77    2.32
   2   5  -8   10.06    3.30
  -2   5   8   13.04    2.87
  -1  -5   8  494.19   16.09
  -1  -5   8  517.75   20.53
  -1  -5   8  479.56   16.79
  -1  -5   8  499.74   16.31
   1  -5  -8  507.27   17.16
   1  -5  -8  512.00   16.01
   1  -5  -8  467.90   16.43
   1   5  -8  502.27   20.06
  -1   5   8  481.09   17.91
   0  -5   8   29.35    3.37
   0  -5  -8   28.64    3.54
   0  -5   8   36.12    5.71
   0  -5  -8   31.62    3.85
   0  -5   8   31.97    3.86
   0  -5   8   31.55    3.45
   0  -5  -8   31.91    3.10
   0   5   8   31.46    4.66
   1  -5   8    6.70    2.88
  -1  -5  -8    3.43    1.50
  -1  -5  -8    3.18    1.13
  -1  -5  -8    4.21    1.95
   1  -5   8    3.51    1.37
   1  -5   8    2.39    1.18
  -1  -5  -8    5.69    2.71
  -1  -5  -8    4.34    1.54
   1   5   8    5.40    2.20
   2  -5   8   21.69    4.38
  -2  -5  -8   25.56    4.00
   2  -5   8   23.17    3.53
   2  -5   8   29.66    3.25
  -2  -5  -8   33.15    5.27
  -2  -5  -8   22.55    2.91
  -2  -5  -8   27.26    3.45
   2  -5   8   31.36    3.42
   2   5   8   28.66    3.73
   2   5   8   28.26    4.66
  -3  -5  -8   17.59    3.36
  -3  -5  -8   24.76    4.62
   3  -5   8   22.32    3.17
   3  -5   8   21.22    3.39
  -3  -5  -8   19.25    4.18
   3  -5   8   22.20    3.26
  -3  -5  -8   26.60    3.54
   3   5   8   19.91    3.62
   3   5   8   24.53    3.52
  -4  -5  -8   14.85    3.00
   4  -5   8   20.58    3.46
  -4  -5  -8   26.32    4.32
   4  -5   8   16.63    2.52
  -4  -5  -8   14.62    3.48
   4   5   8   22.51    4.19
   5  -5   8  111.02    7.62
  -5  -5  -8  107.22    7.41
   5   5   8  112.53   10.03
  -6  -5  -8    6.21    2.74
   6  -5   8   -1.39    1.49
   6   5   8    4.65    2.82
  -7  -5  -8   30.97    5.69
   7  -5   8   27.28    5.24
  -8  -5  -8    0.90    2.42
   8  -5   8    0.10    2.38
  -7  -6   8  169.33   14.70
   7  -6  -8  136.78   12.93
   6  -6  -8  115.10   11.00
  -6  -6   8  123.10   11.81
  -6   6   8  146.85    9.08
   5  -6  -8   97.18    9.34
  -5  -6   8  120.05   11.00
  -5   6   8  124.37    8.38
   4  -6  -8    1.45    1.74
  -4  -6   8   -0.21    1.86
  -4   6   8    4.13    1.99
   4   6  -8   -1.93    1.72
   3  -6  -8   31.48    4.46
  -3  -6   8   27.89    5.49
   3   6  -8   33.20    6.48
  -3   6   8   25.51    4.43
  -2  -6   8  215.36    9.41
   2  -6  -8  197.45    9.06
  -2  -6   8  200.14   12.38
  -2  -6   8  177.87    8.98
  -2   6   8  190.75   10.46
   2   6  -8  167.90   11.79
  -1  -6   8   16.14    3.06
  -1  -6   8   21.61    3.36
  -1  -6   8   18.69    2.96
   1  -6  -8   12.10    2.84
   1  -6  -8   20.07    2.82
  -1  -6   8   14.61    4.06
   1  -6  -8   13.81    2.70
  -1   6   8   12.50    3.07
   1   6  -8   18.47    4.19
   0  -6   8   52.62    4.69
   0  -6   8   46.74    4.34
   0  -6  -8   48.88    5.47
   0  -6   8   41.82    4.93
   0  -6  -8   42.11    3.72
   0  -6  -8   52.49    4.91
   0  -6   8   49.23    7.23
   0   6   8   47.45    6.35
  -1  -6  -8  198.46    9.86
   1  -6   8  231.57   11.19
  -1  -6  -8  221.48    9.18
  -1  -6  -8  209.39   12.33
   1  -6   8  223.03    8.68
  -1  -6  -8  215.16    8.28
   1  -6   8  210.58    8.45
   1  -6   8  223.44   13.26
   1   6   8  229.85   11.86
  -2  -6  -8 2225.41   57.78
  -2  -6  -8 2102.81   58.34
   2  -6   8 2309.52   65.85
   2  -6   8 2184.45   57.29
  -2  -6  -8 2227.91   59.58
   2  -6   8 2246.33   57.82
   2  -6   8 2157.50   60.45
  -2  -6  -8 2148.57   63.53
   2   6   8 2225.64   62.69
   2   6   8 2212.63   60.45
   3  -6   8   26.15    4.01
  -3  -6  -8   20.54    3.40
   3  -6   8   26.69    3.69
  -3  -6  -8   27.92    5.14
   3   6   8   21.50    4.12
  -4  -6  -8   22.96    4.77
   4  -6   8   15.78    2.90
   4  -6   8   19.52    3.44
  -4  -6  -8   21.13    3.66
   4   6   8   22.30    4.55
  -5  -6  -8    0.57    1.84
   5  -6   8    3.54    2.09
   5   6   8    1.73    2.22
  -6  -6  -8   13.12    3.82
   6  -6   8   13.18    3.79
   6   6   8   10.96    4.19
  -7  -6  -8    3.92    2.88
   7  -6   8    2.58    2.51
   7  -7  -8   -1.37    2.41
  -7  -7   8    1.86    3.09
  -6  -7   8    4.94    3.09
   6  -7  -8    7.94    3.65
   5  -7  -8   10.84    3.79
  -5  -7   8   10.71    3.65
  -5   7   8    9.91    3.40
  -4  -7   8  166.40   10.75
   4  -7  -8  210.35   10.99
  -4   7   8  185.85   11.12
   3  -7  -8    1.81    1.78
  -3   7   8    1.92    2.01
   3   7  -8    4.59    3.04
   2  -7  -8  337.42   12.96
  -2  -7   8  333.42   13.57
   2  -7  -8  302.29   14.90
  -2   7   8  324.84   15.45
   2   7  -8  318.54   17.30
  -1  -7   8   19.38    3.32
  -1  -7   8   20.54    3.80
   1  -7  -8   21.70    4.37
   1  -7  -8   18.47    2.91
   1  -7  -8   19.74    3.15
  -1  -7   8   20.29    5.19
  -1   7   8   20.74    4.52
   0  -7  -8   48.27    4.15
   0  -7   8   46.30    4.43
   0  -7   8   43.09    5.51
   0  -7   8   49.31    4.80
   0  -7  -8   43.75    4.60
   0  -7  -8   54.12    6.29
   0  -7   8   74.31    9.59
   0   7   8   59.65    7.50
  -1  -7  -8    8.55    3.73
   1  -7   8    4.62    1.59
  -1  -7  -8    6.11    1.74
   1  -7   8    7.11    1.86
   1  -7   8    6.24    3.54
  -1  -7  -8    5.76    2.30
   1   7   8    3.94    2.31
   2  -7   8  466.90   14.84
  -2  -7  -8  421.44   16.70
  -2  -7  -8  424.78   14.59
  -2  -7  -8  433.52   19.90
   2  -7   8  403.73   17.18
  -3  -7  -8   46.75    6.92
   3  -7   8   33.66    4.11
  -3  -7  -8   38.92    4.49
   3  -7   8   33.40    4.92
   3   7   8   31.75    5.25
  -4  -7  -8    5.73    2.90
  -4  -7  -8   12.24    3.07
   4  -7   8    7.14    2.34
   4   7   8    6.31    3.25
   5  -7   8   37.93    5.20
  -5  -7  -8   32.57    5.04
   5   7   8   28.81    6.02
   6  -7   8   94.83    9.24
  -6  -7  -8   98.66    9.30
  -7  -7  -8   -1.27    2.10
   7  -7   8    3.07    2.96
   6  -8  -8   93.52   10.08
  -6  -8   8   95.81   10.38
  -5  -8   8  106.86   10.55
   5  -8  -8   89.86    8.98
  -5   8   8   79.65    9.22
   4  -8  -8    6.67    2.99
  -4  -8   8    5.56    2.85
  -4   8   8    6.73    3.31
  -3  -8   8  110.40    8.05
   3  -8  -8  116.28    7.57
   3  -8  -8  110.83   11.37
  -3   8   8  111.00   10.93
  -2  -8   8  538.54   20.00
   2  -8  -8  519.07   22.18
   2  -8  -8  552.31   18.62
  -2   8   8  510.94   22.15
  -1  -8   8   53.73    6.57
   1  -8  -8   57.14    5.08
   1  -8  -8   61.01    7.66
  -1  -8   8   63.17    6.11
  -1   8   8   71.27    8.76
   0  -8  -8  114.58   10.02
   0  -8   8  106.98    6.44
   0  -8  -8  121.82    5.99
   0  -8   8  117.00    8.44
   0   8   8  101.10   10.64
  -1  -8  -8  475.79   15.44
   1  -8   8  498.08   16.09
  -1  -8  -8  441.80   21.94
  -1  -8  -8  472.94   19.44
  -2  -8  -8  335.36   17.79
  -2  -8  -8  319.26   14.91
   2  -8   8  325.85   12.20
  -2  -8  -8  328.79   12.22
  -3  -8  -8   48.74    5.16
  -3  -8  -8   56.73    8.43
   3  -8   8   50.40    5.17
   3   8   8   45.15    6.72
  -4  -8  -8   12.10    4.14
  -4  -8  -8   15.26    3.39
   4  -8   8    8.31    2.57
   5  -8   8    8.57    2.98
  -5  -8  -8    9.41    3.24
   6  -8   8    0.83    2.23
  -6  -8  -8    1.69    2.28
   5  -9  -8   11.43    3.71
  -5  -9   8    7.08    3.74
  -4  -9   8   -0.30    1.85
   4  -9  -8    4.84    2.64
  -4   9   8    6.21    3.24
   3  -9  -8   -2.65    1.36
  -3  -9   8    1.03    2.15
  -3   9   8   -0.98    2.21
  -2  -9   8  246.75   12.82
   2  -9  -8  246.22   11.01
   2  -9  -8  235.96   16.97
  -2   9   8  262.49   15.29
   1  -9  -8    9.24    3.60
  -1  -9   8    4.38    2.57
   1  -9  -8    2.91    1.70
  -1   9   8    1.85    2.90
   0  -9   8  100.62    6.47
   0  -9  -8  101.63   12.35
   0  -9   8  104.37   10.38
   0  -9  -8  100.91   14.30
   0  -9  -8  100.94    5.79
   1  -9   8   28.53    5.73
  -1  -9  -8   24.37    6.30
  -1  -9  -8   26.01    3.39
   1  -9   8   33.53    4.22
   2  -9   8  166.30    8.23
  -2  -9  -8  169.22    8.23
  -2  -9  -8  186.62   13.48
   3  -9   8    6.83    2.35
  -3  -9  -8    3.69    3.46
  -3  -9  -8    5.72    2.25
   4  -9   8    3.89    2.33
  -4  -9  -8    4.01    2.18
  -4  -9  -8    3.79    3.43
  -5  -9  -8  145.94    9.59
   5  -9   8  139.08    9.22
   3 -10  -8   21.74    4.14
  -3 -10   8   25.78    5.01
  -2 -10   8  102.59    8.72
  -2 -10   8   86.22    9.24
   2 -10  -8   79.95    7.01
  -1 -10   8  103.36   10.40
   1 -10  -8   90.86    6.08
   0 -10  -8   60.76   10.30
   0 -10   8   54.66    7.66
   0 -10   8   50.39    5.42
   0 -10  -8   58.73    5.32
  -1 -10  -8   44.07    8.96
   1 -10   8   33.78    6.45
  -1 -10  -8   39.53    4.34
   1 -10   8   41.28    4.82
  -2 -10  -8   25.10    6.72
  -2 -10  -8   18.26    3.30
   2 -10   8   18.23    3.27
   3 -10   8   73.23    6.59
  -3 -10  -8   78.28   10.81
  -3 -10  -8   64.40    6.38
   9   0  -9   13.61    5.21
  -9   0   9   16.56    5.08
  -8   0   9    0.48    2.33
   8   0  -9    0.43    2.47
  -7   0   9   -0.81    2.04
   7   0  -9   -0.07    2.03
   6   0  -9   -0.91    1.84
  -6   0   9   -0.45    1.90
   5   0  -9  715.27   25.33
  -5   0   9  717.70   25.36
   4   0  -9    1.62    1.46
  -4   0   9   -0.85    1.08
   3   0  -9  942.98   29.01
   2   0  -9   -0.85    0.81
   1   0  -9 4721.07  115.24
  -1   0   9 4494.50  117.35
   0   0   9   -2.09    0.43
   0   0  -9   -1.40    0.73
   0   0   9   -1.87    0.74
   0   0  -9   -0.50    0.65
   1   0   9 1904.56   51.08
  -1   0  -9 2059.71   52.56
   1   0   9 1980.36   53.26
  -1   0  -9 2071.07   50.62
   2   0   9   -0.71    1.07
  -2   0  -9   -0.76    0.72
   2   0   9   -0.84    0.65
   3   0   9 3595.69   89.03
   3   0   9 3619.90   92.81
  -3   0  -9 3563.00   91.85
   4   0   9   -0.77    0.91
  -4   0  -9   -0.73    1.06
   5   0   9   33.37    4.74
  -5   0  -9   42.89    5.11
  -6   0  -9    1.69    1.75
   6   0   9   -1.78    1.31
   7   0   9  237.09   13.35
  -7   0  -9  241.40   12.73
  -8   0  -9    0.95    2.32
   8   0   9   -0.97    2.32
  -9   0  -9   42.13    7.14
   9   0   9   32.77    7.10
  -9  -1   9   29.02    6.23
   9  -1  -9   40.52    8.02
   9   1  -9   30.69    7.05
   8  -1  -9    0.13    2.60
  -8  -1   9   -0.58    2.39
   8   1  -9    2.17    2.71
  -8   1   9   -0.11    2.30
   7  -1  -9    2.06    2.59
  -7  -1   9    0.47    2.18
   7   1  -9    3.68    3.04
  -7   1   9    2.32    2.51
   6  -1  -9   25.09    4.81
  -6  -1   9   31.26    5.57
   6   1  -9   17.77    4.27
  -6   1   9   29.44    5.09
   5  -1  -9    1.18    1.80
  -5  -1   9    4.72    2.48
   5   1  -9    1.70    1.80
  -5   1   9    4.25    2.02
  -4  -1   9  937.02   30.31
   4  -1  -9  937.32   29.94
  -4   1   9  894.80   29.28
   4   1  -9  953.59   29.68
   3  -1  -9   12.19    2.87
   3   1  -9    8.29    2.31
  -3   1   9   11.48    2.72
   3   1  -9    9.32    2.49
   2   1  -9  489.22   17.01
   2   1  -9  519.24   17.15
  -1  -1   9   -0.58    0.62
  -1  -1   9   -0.87    0.81
   1  -1  -9   -0.56    0.79
   1   1  -9   -1.02    0.61
   1   1  -9   -1.21    0.62
   0  -1   9  478.92   16.42
   0  -1  -9  489.79   13.05
   0  -1   9  497.76   15.76
   0  -1  -9  527.36   16.02
   0   1  -9  498.16   15.60
   0   1   9  502.09   16.63
   0   1  -9  505.90   16.03
   1  -1   9  363.78   12.84
  -1  -1  -9  379.19   12.11
  -1  -1  -9  355.33   12.18
   1  -1   9  361.97   10.21
  -1   1  -9  374.33   12.47
   1   1   9  350.31   12.97
   2  -1   9 2213.19   57.87
  -2  -1  -9 2212.56   57.11
  -2  -1  -9 2236.06   56.69
   2   1   9 2125.64   57.65
   2   1   9 2203.24   58.33
  -2   1  -9 2093.75   57.10
   2   1   9 2214.95   55.85
   3  -1   9  115.55    6.64
  -3  -1  -9  120.70    6.44
  -3   1  -9  127.75    6.48
   3   1   9  131.18    7.17
   3   1   9  131.13    5.52
   4  -1   9 2234.37   59.31
  -4  -1  -9 2160.90   58.33
  -4   1  -9 2134.68   58.05
   4   1   9 2211.09   59.51
   4   1   9 2103.60   55.58
  -5  -1  -9   -1.34    1.17
   5  -1   9   -0.46    1.36
   5   1   9   -0.67    1.58
  -5   1  -9    1.20    1.47
   6  -1   9  159.85    9.98
  -6  -1  -9  158.76    9.47
  -6   1  -9  178.85    9.78
   6   1   9  171.36   10.35
   7  -1   9   18.01    4.38
  -7  -1  -9   30.03    5.14
  -7   1  -9   26.81    4.89
   7   1   9   32.21    5.59
  -8  -1  -9  389.43   18.32
   8  -1   9  396.28   19.24
  -8   1  -9  404.08   18.23
   8   1   9  389.63   19.25
  -9  -1  -9   -0.41    2.64
   9  -1   9    1.28    3.01
   9   1   9    5.08    3.99
  -9  -2   9    9.97    4.56
   9  -2  -9   11.65    4.65
   8  -2  -9   44.90    7.76
  -8  -2   9   61.96    9.11
   8   2  -9   63.58    8.70
  -7  -2   9    2.25    2.95
   7  -2  -9    3.92    3.12
   7   2  -9    3.66    2.96
  -7   2   9    5.82    3.03
  -6  -2   9  398.58   18.36
   6  -2  -9  383.33   18.04
   6   2  -9  396.21   18.92
  -6   2   9  396.64   17.05
   6   2  -9  419.32   17.89
  -5  -2   9    9.63    3.09
   5  -2  -9   13.02    3.45
  -5   2   9   13.49    3.12
   5   2  -9   18.23    4.19
   5   2  -9   15.13    3.54
  -4  -2   9  709.84   25.05
   4  -2  -9  726.25   24.64
   4   2  -9  735.63   24.12
   4   2  -9  696.38   25.20
  -4   2   9  713.54   23.70
   3  -2  -9  753.80   24.23
  -3   2   9  741.71   23.46
   3   2  -9  747.43   25.07
   3   2  -9  705.21   23.29
  -2  -2   9    1.90    1.23
   2  -2  -9    0.47    1.10
   2   2  -9   -0.63    0.78
  -2   2   9    1.93    1.24
   2   2  -9    2.79    1.49
  -1  -2   9   94.05    5.86
  -1  -2   9   96.77    5.85
   1  -2  -9   86.61    5.22
  -1  -2   9   88.00    5.38
   1  -2  -9   95.55    5.87
   1   2  -9   92.97    5.22
   1   2  -9   90.82    3.58
   1   2  -9  105.85    6.23
   0  -2  -9 1728.85   45.71
   0  -2   9 1709.86   46.52
   0  -2  -9 1751.62   46.92
   0  -2   9 1583.82   45.77
   0  -2   9 1689.37   47.05
   0   2  -9 1766.02   47.04
   0   2   9 1776.75   46.70
   0   2  -9 1789.30   45.95
  -1  -2  -9  715.39   22.29
  -1  -2  -9  736.90   21.20
   1  -2   9  707.67   21.79
   1  -2   9  763.71   22.88
   1  -2   9  738.19   21.36
  -1   2  -9  710.14   21.47
   1   2   9  733.88   21.22
   1   2   9  725.00   22.39
  -2  -2  -9  462.34   15.65
  -2  -2  -9  462.22   15.12
   2  -2   9  454.46   15.50
   2   2   9  479.37   15.07
   2   2   9  465.79   16.15
  -2   2  -9  485.54   15.41
   3  -2   9  800.61   24.40
  -3  -2  -9  798.47   23.85
   3   2   9  806.30   23.30
   3   2   9  782.02   24.84
  -3   2  -9  765.79   23.62
   4  -2   9 1531.22   43.81
  -4  -2  -9 1565.17   43.43
  -4   2  -9 1544.06   42.94
   4   2   9 1539.53   44.34
  -5  -2  -9    1.39    1.79
   5  -2   9    2.05    1.80
   5   2   9    2.57    2.03
  -5   2  -9    1.58    1.60
  -6  -2  -9  352.02   15.35
   6  -2   9  335.21   15.66
  -6   2  -9  355.45   15.01
   6   2   9  382.52   16.50
   7  -2   9   42.72    6.44
  -7  -2  -9   38.97    5.78
   7   2   9   37.48    6.35
  -7   2  -9   43.67    6.26
   8  -2   9    4.67    3.25
  -8  -2  -9    3.35    2.90
   8   2   9    0.43    2.60
  -9  -2  -9    7.62    3.91
   9  -2   9    7.12    4.10
   8  -3  -9   46.53    8.15
  -8  -3   9   42.11    7.61
  -7  -3   9  170.72   12.07
   7  -3  -9  171.26   14.59
   7   3  -9  172.23   11.28
  -6  -3   9  546.26   22.62
   6  -3  -9  518.63   22.05
   6   3  -9  560.61   21.56
   6   3  -9  539.12   24.06
  -6   3   9  558.47   20.71
  -5  -3   9  129.36    9.40
   5  -3  -9  143.25    9.52
   5   3  -9  138.54   12.33
   5   3  -9  141.39    8.73
  -5   3   9  145.29    8.43
   4  -3  -9 1355.66   40.29
  -4  -3   9 1236.41   40.46
   4   3  -9 1356.05   39.03
   4   3  -9 1370.88   42.51
  -4   3   9 1349.69   38.40
   3  -3  -9    5.14    1.98
   3   3  -9    3.95    1.59
   3   3  -9    2.84    1.85
  -3   3   9    5.67    1.83
  -2  -3   9  578.51   20.37
   2  -3  -9  565.93   19.06
   2   3  -9  607.56   21.22
  -2   3   9  584.45   18.10
   2   3  -9  563.41   18.12
   2   3  -9  558.23   17.33
   1  -3  -9   40.27    4.57
  -1  -3   9   49.10    5.59
  -1  -3   9   45.47    4.53
   1  -3  -9   39.98    4.09
  -1  -3   9   39.76    4.57
   1   3  -9   36.36    4.64
   1   3  -9   45.23    3.88
   0  -3   9 2081.39   52.25
   0  -3  -9 2071.08   52.55
   0  -3  -9 2049.42   55.79
   0  -3  -9 2064.37   54.50
   0  -3   9 2073.79   55.45
   0  -3   9 2107.00   57.67
   0  -3   9 2070.36   55.08
   0   3  -9 2148.78   57.45
   0   3   9 2166.62   55.56
  -1  -3  -9    3.14    1.37
  -1  -3  -9    2.80    1.17
   1  -3   9   10.21    2.03
   1  -3   9    0.61    1.25
   1  -3   9    3.38    1.27
  -1  -3  -9    4.17    1.80
   1   3   9    2.23    1.21
  -1   3  -9    1.21    0.75
   1   3   9    2.86    1.24
   2  -3   9 2112.52   57.37
   2  -3   9 2276.66   58.17
  -2  -3  -9 2206.88   59.72
  -2  -3  -9 2113.78   57.48
  -2   3  -9 2258.73   57.80
   2   3   9 2245.14   59.02
   2   3   9 2191.63   56.72
   2   3   9 2239.73   58.72
  -3  -3  -9   80.92    5.72
  -3  -3  -9   86.62    5.32
   3  -3   9   92.96    5.72
   3   3   9   68.24    5.12
   3   3   9   77.23    6.79
  -3   3  -9   82.03    5.10
   3   3   9   81.15    4.99
   4  -3   9  498.85   13.52
  -4  -3  -9  517.21   17.68
  -4  -3  -9  495.37   16.39
   4  -3   9  506.56   17.94
   4   3   9  511.34   18.56
  -4   3  -9  484.43   16.99
   5  -3   9   49.31    5.93
  -5  -3  -9   40.50    5.23
  -5  -3  -9   34.86    3.97
   5   3   9   33.71    5.01
  -5   3  -9   46.43    5.34
   6  -3   9   55.07    6.62
  -6  -3  -9   42.74    5.68
  -6   3  -9   43.07    5.58
   6   3   9   36.34    5.62
   7  -3   9   14.82    3.95
  -7  -3  -9   15.55    4.15
   7   3   9    3.88    2.96
   8  -3   9  250.74   15.05
  -8  -3  -9  285.72   15.27
   8  -4  -9   -1.41    2.64
  -8  -4   9    1.12    2.73
   7  -4  -9  201.43   13.37
  -7  -4   9  211.39   13.60
  -6  -4   9   48.53    7.04
   6  -4  -9   42.17    6.59
  -6   4   9   47.50    5.15
  -5  -4   9 1500.64   47.71
   5  -4  -9 1579.48   47.50
   5   4  -9 1510.40   45.03
   5   4  -9 1597.31   50.88
  -5   4   9 1609.96   44.23
  -4  -4   9 1279.30   41.36
   4  -4  -9 1319.26   40.66
  -4   4   9 1353.74   38.70
   4   4  -9 1436.87   39.20
  -4   4   9 1416.56   38.06
   4   4  -9 1272.81   43.62
   3  -4  -9  400.77   15.66
  -3  -4   9  409.88   17.11
   3   4  -9  351.15   17.21
   3   4  -9  420.22   14.30
  -3   4   9  422.41   14.98
  -2  -4   9   28.13    4.50
  -2  -4   9   32.67    4.33
   2  -4  -9   26.39    3.64
  -2   4   9   33.37    4.21
  -2   4   9   35.15    3.13
   2   4  -9   34.26    5.55
   1  -4  -9   88.25    5.75
  -1  -4   9   88.23    5.48
  -1  -4   9   99.22    7.25
  -1  -4   9  100.13    6.12
  -1  -4   9   95.70    4.47
   1  -4  -9   90.35    5.34
  -1   4   9   89.39    4.11
  -1   4   9   93.82    5.94
   1   4  -9  102.03    4.46
   1   4  -9   90.90    8.35
   0  -4   9  230.83    8.58
   0  -4   9  250.89   12.28
   0  -4  -9  260.98    9.06
   0  -4   9  249.30   10.00
   0  -4  -9  240.69    9.16
   0  -4   9  258.03    9.88
   0  -4  -9  251.26   10.32
   0   4   9  238.68   10.58
   0   4  -9  257.46    7.96
   1  -4   9  954.17   28.22
  -1  -4  -9 1003.47   28.93
   1  -4   9  970.35   28.08
  -1  -4  -9  978.16   31.45
  -1  -4  -9 1030.44   27.05
  -1  -4  -9  977.65   27.70
   1  -4   9 1005.18   32.15
  -1   4  -9 1020.47   26.45
   1   4   9  966.31   27.70
   1   4   9 1034.68   30.18
  -2  -4  -9  235.77   11.45
  -2  -4  -9  231.94    9.27
  -2  -4  -9  236.19    9.91
  -2  -4  -9  234.20   10.06
   2  -4   9  238.79    9.58
   2  -4   9  231.94    9.15
  -2   4  -9  235.49    8.70
   2   4   9  247.53    9.47
   2   4   9  249.31   10.95
   3  -4   9   92.78    5.73
   3  -4   9   87.20    5.81
   3  -4   9   85.29    4.88
  -3  -4  -9   85.26    6.37
  -3  -4  -9   84.33    5.58
  -3  -4  -9   87.39    5.48
   3   4   9   85.66    5.96
   3   4   9   81.74    5.58
   3   4   9   88.49    6.28
  -4  -4  -9  219.83   10.26
  -4  -4  -9  228.38   10.14
   4  -4   9  217.61    7.82
   4  -4   9  221.96   10.46
   4   4   9  237.37   11.10
   4   4   9  227.46   11.05
  -4   4  -9  234.49    9.87
   5  -4   9   18.25    3.66
  -5  -4  -9   28.60    4.44
  -5  -4  -9   25.48    3.85
   5   4   9   23.44    4.31
   5   4   9   28.57    4.94
   6  -4   9   23.99    4.48
  -6  -4  -9   33.04    4.44
  -6  -4  -9   22.62    4.38
   6   4   9   41.88    6.35
  -7  -4  -9   23.82    5.04
   7  -4   9   14.92    4.04
   7   4   9   10.39    3.86
  -8  -4  -9   -0.46    2.37
   8  -4   9    0.93    2.58
  -8  -5   9    3.90    3.19
   8  -5  -9    3.27    3.57
   7  -5  -9  163.86   12.11
  -7  -5   9  185.51   12.81
   6  -5  -9   19.63    4.55
  -6  -5   9   21.68    5.08
  -6   5   9   13.25    3.37
  -5  -5   9   42.87    6.46
   5  -5  -9   33.50    5.55
   5   5  -9   39.88    7.41
  -5   5   9   42.26    5.24
  -4  -5   9 1752.98   51.58
   4  -5  -9 1702.48   50.24
  -4   5   9 1758.09   49.21
   4   5  -9 1699.41   54.50
   3  -5  -9   87.63    7.57
  -3  -5   9   65.01    7.64
   3   5  -9   92.41    9.86
   3   5  -9   86.46    4.74
  -3   5   9   68.01    6.50
   2  -5  -9  147.29    7.91
  -2  -5   9  154.64    8.16
  -2  -5   9  163.35   10.44
  -2   5   9  159.35    8.71
   2   5  -9  165.65   10.75
  -1  -5   9   38.47    6.12
  -1  -5   9   47.36    5.18
   1  -5  -9   39.65    4.31
   1  -5  -9   32.83    4.21
  -1  -5   9   34.91    3.67
   1  -5  -9   37.56    4.06
  -1  -5   9   35.09    4.13
   1   5  -9   30.36    5.00
  -1   5   9   40.57    5.21
   0  -5  -9  679.05   20.34
   0  -5  -9  684.18   21.72
   0  -5   9  731.26   21.61
   0  -5   9  673.91   20.88
   0  -5   9  698.38   25.62
   0  -5  -9  680.80   21.25
   0  -5   9  691.34   21.13
   0   5   9  667.91   23.12
  -1  -5  -9  535.57   16.47
  -1  -5  -9  515.62   20.64
  -1  -5  -9  531.17   16.96
   1  -5   9  514.53   16.70
   1  -5   9  537.27   17.03
  -1  -5  -9  522.56   17.46
   1  -5   9  528.70   21.45
   1   5   9  550.70   19.65
  -2  -5  -9  390.61   16.64
  -2  -5  -9  384.62   13.21
   2  -5   9  370.53   12.92
  -2  -5  -9  359.68   14.43
   2  -5   9  376.83   17.32
  -2  -5  -9  367.26   13.71
   2  -5   9  404.44   13.54
   2   5   9  394.89   15.94
   2   5   9  367.42   12.57
   2   5   9  382.01   13.98
  -3  -5  -9 1493.96   44.27
   3  -5   9 1480.74   41.08
   3  -5   9 1442.65   40.56
   3  -5   9 1448.08   40.39
  -3  -5  -9 1442.49   42.15
  -3  -5  -9 1458.24   40.91
   3   5   9 1492.64   43.72
   3   5   9 1517.80   42.60
   3   5   9 1430.99   40.99
   4  -5   9   64.54    4.21
  -4  -5  -9   55.72    5.98
  -4  -5  -9   59.35    6.75
   4  -5   9   68.70    6.38
  -4  -5  -9   63.89    6.17
   4   5   9   68.14    7.02
  -5  -5  -9   22.36    4.01
   5  -5   9   16.16    3.46
   5   5   9   20.49    4.43
   6  -5   9   35.05    5.48
  -6  -5  -9   35.09    5.33
   6   5   9   36.62    6.21
  -7  -5  -9   90.48    9.27
   7  -5   9   84.91    9.25
   7   5   9   84.08    9.96
  -8  -5  -9   12.72    4.44
   8  -5   9    3.98    3.00
   7  -6  -9  432.19   20.91
  -7  -6   9  439.96   21.50
   6  -6  -9   23.54    5.26
  -6  -6   9   17.19    4.85
  -6   6   9   15.33    3.76
   5  -6  -9  400.07   18.11
  -5  -6   9  434.87   19.28
  -5   6   9  408.04   17.22
   4  -6  -9  602.50   22.47
  -4  -6   9  618.92   23.60
  -4   6   9  621.56   22.57
   4   6  -9  606.09   26.91
  -3  -6   9    2.61    2.51
   3  -6  -9    1.78    1.57
   3   6  -9    0.52    2.14
  -3   6   9   -0.96    1.41
  -2  -6   9  200.95   12.63
  -2  -6   9  209.68   10.00
   2  -6  -9  205.29    9.60
   2   6  -9  201.46   12.86
  -2   6   9  183.23   10.46
   1  -6  -9   16.94    3.14
  -1  -6   9   13.31    2.65
   1  -6  -9   13.03    3.01
  -1  -6   9   14.91    2.71
  -1  -6   9   17.84    3.34
  -1  -6   9   16.52    4.23
   1  -6  -9   14.53    2.73
   1   6  -9   16.80    4.28
  -1   6   9   15.39    3.55
   0  -6   9  166.55   11.39
   0  -6  -9  175.86    8.96
   0  -6   9  180.71    8.33
   0  -6   9  163.48    7.79
   0  -6  -9  181.72    7.56
   0  -6   9  182.88    8.72
   0  -6  -9  156.64    8.10
   0   6   9  178.70   10.22
   1  -6   9  160.73   11.04
  -1  -6  -9  143.83    6.54
  -1  -6  -9  134.41    9.74
  -1  -6  -9  131.30    7.38
  -1  -6  -9  127.30    6.94
   1  -6   9  142.23    6.71
   1  -6   9  129.39    6.70
   1   6   9  135.21    8.91
   2  -6   9  215.61   13.22
   2  -6   9  207.21   10.45
  -2  -6  -9  204.26   12.09
   2  -6   9  195.27    8.37
  -2  -6  -9  201.28    8.67
  -2  -6  -9  204.78   10.29
   2  -6   9  203.54    8.86
   2   6   9  200.19   11.48
   2   6   9  190.66    9.65
  -3  -6  -9    4.19    2.74
   3  -6   9   -0.87    1.84
  -3  -6  -9    4.18    1.87
   3  -6   9    1.14    1.64
   3   6   9    2.53    1.96
   4  -6   9   -1.33    1.20
   4  -6   9   -1.01    1.31
  -4  -6  -9   -0.35    1.46
  -4  -6  -9    0.48    2.09
   4   6   9   -0.18    1.71
  -5  -6  -9  136.80    8.74
   5  -6   9  143.33    8.95
   5   6   9  142.78   10.28
  -6  -6  -9    6.05    2.96
   6  -6   9   11.32    3.51
   6   6   9    4.87    3.13
   7  -6   9   55.57    7.71
  -7  -6  -9   63.64    8.10
  -7  -7   9   -1.94    2.61
   7  -7  -9   -2.47    2.34
   6  -7  -9   56.98    8.03
  -6  -7   9   55.48    8.07
   5  -7  -9  428.40   19.25
  -5  -7   9  491.50   20.91
  -5   7   9  460.41   19.57
  -4  -7   9  120.45   10.71
   4  -7  -9  131.71    8.73
  -4   7   9  104.48    9.69
   3  -7  -9   65.11    6.67
   3   7  -9   72.30   10.42
  -3   7   9   60.58    7.54
   2  -7  -9   33.90    5.35
  -2  -7   9   30.05    4.22
   2  -7  -9   34.74    4.52
  -2   7   9   25.37    4.84
   2   7  -9   32.32    6.43
   1  -7  -9    0.22    1.08
   1  -7  -9   -1.66    1.28
  -1  -7   9    0.97    1.40
  -1  -7   9    1.58    1.57
  -1   7   9    0.32    1.93
   0  -7  -9    5.94    2.31
   0  -7   9    2.77    1.62
   0  -7   9    2.93    3.20
   0  -7  -9    3.20    1.35
   0  -7   9    2.33    1.84
   0   7   9    3.72    2.42
  -1  -7  -9  316.54   11.38
  -1  -7  -9  310.35   13.51
  -1  -7  -9  334.32   17.17
   1  -7   9  304.49   11.81
   1   7   9  300.62   15.32
  -2  -7  -9   52.89    7.59
  -2  -7  -9   54.37    5.76
   2  -7   9   49.15    4.87
   2  -7   9   56.02    6.56
  -2  -7  -9   56.53    5.12
   2   7   9   46.19    6.75
  -3  -7  -9  530.81   18.06
  -3  -7  -9  503.79   22.03
   3  -7   9  511.03   17.92
   3  -7   9  511.78   19.24
   3   7   9  543.20   20.68
  -4  -7  -9    1.34    1.74
  -4  -7  -9    3.28    2.73
   4  -7   9    0.25    1.58
   4   7   9    0.85    1.97
   5  -7   9   56.92    6.69
  -5  -7  -9   59.00    6.68
   5   7   9   69.27   11.95
   6  -7   9    6.27    3.26
  -6  -7  -9    9.12    3.40
   7  -7   9   63.65    8.21
  -7  -7  -9   74.35    8.89
  -6  -8   9    0.64    2.90
   6  -8  -9    2.52    2.91
   5  -8  -9   49.15    6.97
  -5  -8   9   62.25    8.28
  -5   8   9   40.58    6.73
   4  -8  -9    7.50    2.95
  -4  -8   9    3.57    2.76
  -4   8   9    2.95    2.70
   3  -8  -9   45.47    7.18
   3  -8  -9   51.53    6.06
  -3   8   9   43.63    6.85
   2  -8  -9   36.47    6.05
  -2  -8   9   45.69    5.65
   2  -8  -9   40.60    5.07
  -2   8   9   28.39    5.71
  -1  -8   9    0.57    1.65
  -1  -8   9    1.77    1.81
   1  -8  -9   -0.91    1.74
   1  -8  -9    0.36    1.26
  -1   8   9    4.20    2.77
   0  -8   9    5.77    2.61
   0  -8  -9    4.99    2.59
   0  -8   9    4.98    2.20
   0  -8  -9    7.89    2.11
   0   8   9    6.82    3.03
  -1  -8  -9  108.07    5.97
  -1  -8  -9  123.91   12.77
   1  -8   9  103.26    9.55
   1  -8   9  100.02    6.24
  -1  -8  -9  107.11    9.45
   1   8   9   95.53   10.35
  -2  -8  -9    2.04    2.23
   2  -8   9    2.71    1.78
  -2  -8  -9    0.61    2.66
  -2  -8  -9    5.02    1.79
   3  -8   9   20.02    3.49
  -3  -8  -9   19.66    3.44
  -3  -8  -9   15.19    4.87
  -4  -8  -9   50.12    5.90
   4  -8   9   47.82    5.66
  -4  -8  -9   45.23    7.34
  -5  -8  -9   64.79    7.35
   5  -8   9   59.30    6.93
   6  -8   9   40.95    6.45
  -6  -8  -9   43.83    6.58
   5  -9  -9   60.14    7.79
  -5  -9   9   50.32    7.66
  -4  -9   9    9.28    3.60
   4  -9  -9   13.68    3.74
   3  -9  -9   25.40    4.43
  -3  -9   9   19.34    4.45
   2  -9  -9    3.45    2.10
  -2  -9   9    3.00    2.43
  -2   9   9   12.86    5.08
   1  -9  -9   10.73    2.75
  -1  -9   9   11.21    3.57
   0  -9   9    5.81    2.21
   0  -9  -9    4.43    1.78
   0  -9   9    4.64    2.52
   0  -9  -9    2.48    3.06
   1  -9   9  204.34    9.74
  -1  -9  -9  217.58    9.33
  -1  -9  -9  204.95   14.82
   1  -9   9  192.46   12.06
  -2  -9  -9    8.60    2.54
   2  -9   9    5.57    2.29
  -2  -9  -9   10.22    4.44
   3  -9   9    8.20    2.64
  -3  -9  -9   10.96    2.85
  -3  -9  -9   10.40    4.59
   4  -9   9  419.37   16.91
  -4  -9  -9  405.28   20.88
  -4  -9  -9  444.25   17.28
  -5  -9  -9   23.74    4.66
   5  -9   9   16.97    4.02
   3 -10  -9    0.62    2.14
  -3 -10   9   -0.81    2.30
  -2 -10   9   94.77    9.34
   2 -10  -9   92.28    7.86
   1 -10  -9   18.70    3.46
  -1 -10   9   25.47    5.15
   0 -10  -9   10.45    4.77
   0 -10   9    6.88    3.49
   0 -10   9    9.32    2.76
   0 -10  -9    5.54    2.20
  -1 -10  -9   33.05    7.47
  -1 -10  -9   27.29    3.84
   1 -10   9   33.07    6.35
   1 -10   9   22.78    3.81
  -2 -10  -9   -1.47    3.06
  -2 -10  -9    2.39    1.85
   2 -10   9    2.14    2.01
  -3 -10  -9    1.84    1.89
  -3 -10  -9    6.28    3.93
   3 -10   9    2.29    1.81
  -9   0  10   -1.38    2.66
   9   0 -10    1.48    3.52
   8   0 -10   11.57    4.68
  -8   0  10   10.00    3.66
   7   0 -10   -0.91    2.17
  -7   0  10    3.89    2.55
  -6   0  10 1337.94   43.28
   6   0 -10 1433.49   44.18
  -5   0  10    1.87    2.01
   5   0 -10   -0.63    1.45
  -4   0  10  338.77   14.81
   4   0 -10  333.84   14.61
   3   0 -10    2.02    1.58
   2   0 -10 9162.31  220.94
   2   0 -10 8689.29  222.17
  -1   0  10   -0.91    0.92
   1   0 -10    0.14    0.93
   1   0 -10   -0.89    0.63
   0   0 -10  130.41    5.24
   0   0  10  126.58    6.86
   0   0 -10  129.44    6.46
   0   0  10  118.29    5.15
  -1   0 -10    0.31    0.88
  -1   0 -10    0.15    0.54
   1   0  10    0.05    0.94
   2   0  10  624.62   20.30
  -2   0 -10  633.01   19.43
   2   0  10  618.76   18.62
   3   0  10   -0.34    0.59
   3   0  10    8.79    2.53
  -3   0 -10    0.39    1.19
   4   0  10 1088.56   28.65
  -4   0 -10 1087.99   32.27
   4   0  10 1116.97   33.49
  -5   0 -10   -0.75    1.54
   5   0  10    1.24    1.54
   6   0  10  364.01   16.40
  -6   0 -10  352.26   15.32
  -7   0 -10    0.96    2.19
   7   0  10   -1.56    2.07
   8   0  10   30.53    6.13
  -8   0 -10   33.87    6.14
  -9   0 -10   -2.20    2.46
   9   0  10   -2.29    2.74
  -9  -1  10  370.03   19.92
   9  -1 -10  350.45   20.06
   9   1 -10  358.61   19.80
   8  -1 -10   10.72    4.14
  -8  -1  10    6.62    3.82
   8   1 -10    6.70    3.67
  -8   1  10    7.97    3.67
   7  -1 -10  386.66   18.87
  -7  -1  10  391.57   18.86
  -7   1  10  384.85   18.08
   7   1 -10  383.12   18.47
  -6  -1  10  239.12   13.46
   6  -1 -10  225.01   13.11
   6   1 -10  248.86   13.19
  -6   1  10  226.01   12.62
   5  -1 -10  629.20   23.41
  -5  -1  10  645.22   23.75
   5   1 -10  606.42   22.93
  -5   1  10  608.60   22.74
  -4  -1  10   52.24    6.45
   4  -1 -10   45.99    5.78
   4   1 -10   56.38    6.26
   4   1 -10   46.37    5.57
  -4   1  10   69.16    7.03
   3  -1 -10  972.28   29.25
   3   1 -10  893.67   28.55
  -3   1  10  887.28   28.67
   3   1 -10  917.69   28.52
   2  -1 -10  380.11   14.41
   2   1 -10  390.60   14.38
   2   1 -10  379.82   14.18
  -1  -1  10  270.32   10.36
   1  -1 -10  288.21   11.12
  -1  -1  10  274.79   11.63
   1  -1 -10  278.23    8.94
   1   1 -10  286.67   11.05
   1   1 -10  277.69   10.70
  -1   1  10  260.86   11.23
   0  -1 -10    1.65    1.20
   0  -1  10    3.30    1.53
   0  -1  10    0.83    0.89
   0  -1 -10    0.23    0.42
   0   1  10    0.22    0.97
   0   1 -10    0.87    0.84
   0   1 -10    1.11    1.03
   1  -1  10 3736.84   92.62
   1  -1  10 3734.77   93.60
  -1  -1 -10 3689.48   92.64
  -1  -1 -10 3599.56   91.95
   1  -1  10 3603.80   89.82
   1   1  10 3498.09   93.61
  -1   1 -10 3637.57   92.85
  -2  -1 -10   89.10    4.82
   2  -1  10   92.69    4.19
   2  -1  10   91.47    5.64
  -2  -1 -10   94.93    5.34
   2   1  10   85.72    5.73
   2   1  10   83.62    5.30
  -2   1 -10   95.23    5.41
   3  -1  10  463.41   16.29
  -3  -1 -10  425.04   15.42
  -3   1 -10  471.44   15.71
   3   1  10  444.89   16.42
   3   1  10  468.42   14.12
   4  -1  10 1779.71   49.73
  -4  -1 -10 1725.96   48.64
   4   1  10 1746.98   49.87
   4   1  10 1788.33   46.17
  -4   1 -10 1776.81   48.64
  -5  -1 -10  103.88    6.96
   5  -1  10  101.84    7.32
   5   1  10   84.43    7.79
  -5   1 -10   96.95    6.72
   6  -1  10  154.55    9.82
  -6  -1 -10  155.13    9.33
  -6   1 -10  127.82    8.45
   6   1  10  140.44    9.54
  -7  -1 -10   12.74    3.58
   7  -1  10   12.75    3.97
  -7   1 -10    7.01    3.12
   7   1  10    7.55    3.16
   8  -1  10   12.83    4.15
  -8  -1 -10    5.74    3.16
  -8   1 -10    9.53    3.76
   8   1  10    9.90    3.98
   9  -1  10   59.49    8.86
  -9  -1 -10   84.21   10.27
   9   1  10   63.95    9.46
   9  -2 -10   19.09    5.93
  -9  -2  10   14.77    5.22
   8  -2 -10    0.02    2.71
  -8  -2  10    0.60    2.58
   8   2 -10    2.36    2.95
   7  -2 -10  382.84   18.91
  -7  -2  10  398.58   19.11
  -7   2  10  380.01   17.60
   7   2 -10  366.92   18.07
  -6  -2  10  728.24   27.82
   6  -2 -10  713.02   27.48
   6   2 -10  766.42   27.30
  -6   2  10  755.96   26.43
   6   2 -10  752.19   28.99
   5  -2 -10  498.95   20.25
  -5  -2  10  504.90   20.67
  -5   2  10  520.11   19.36
   5   2 -10  480.30   19.34
   5   2 -10  491.77   20.98
  -4  -2  10   98.65    9.19
   4  -2 -10   86.30    8.31
   4   2 -10   94.82    6.76
   4   2 -10   94.53    9.11
  -4   2  10   84.81    7.54
   3  -2 -10   52.53    5.68
   3   2 -10   48.04    5.56
  -3   2  10   65.99    6.30
   3   2 -10   62.69    5.94
   2  -2 -10  699.73   23.22
  -2  -2  10  731.98   23.42
   2   2 -10  749.38   24.33
   2   2 -10  746.07   22.97
  -1  -2  10  360.61   13.98
   1  -2 -10  390.72   13.74
  -1  -2  10  367.23   14.28
   1   2 -10  372.93   14.27
   1   2 -10  369.78   13.29
   1   2 -10  389.23   10.64
   0  -2 -10  537.28   17.05
   0  -2  10  536.29   17.87
   0  -2  10  525.76   18.36
   0  -2  10  544.09   18.19
   0   2 -10  529.12   17.10
   0   2  10  522.95   17.76
   0   2 -10  548.16   17.93
  -1  -2 -10   29.72    3.25
   1  -2  10   39.81    4.24
  -1  -2 -10   33.03    3.96
   1  -2  10   31.45    3.94
   1   2  10   41.15    3.85
   1   2  10   37.75    4.31
  -1   2 -10   37.17    3.88
  -2  -2 -10  616.88   19.70
   2  -2  10  615.35   19.83
  -2  -2 -10  640.10   19.36
   2   2  10  626.30   18.99
   2   2  10  610.20   20.42
  -2   2 -10  622.22   19.57
   3  -2  10  288.66   11.72
  -3  -2 -10  281.01   11.20
   3   2  10  279.25   10.60
   3   2  10  274.17   12.01
  -3   2 -10  294.48   11.33
  -4  -2 -10  624.75   20.56
   4  -2  10  612.99   21.14
   4   2  10  615.52   19.25
   4   2  10  583.30   21.23
  -4   2 -10  621.44   20.25
   5  -2  10   -0.39    1.40
  -5  -2 -10    2.56    1.96
   5   2  10    0.58    1.70
  -5   2 -10   -0.86    1.37
  -6  -2 -10   55.55    6.63
   6  -2  10   34.86    5.42
   6   2  10   47.88    6.90
  -6   2 -10   53.45    6.31
  -7  -2 -10   12.74    3.68
   7  -2  10   12.86    3.89
  -7   2 -10   11.64    3.61
   7   2  10    9.96    3.79
   8  -2  10  115.89   11.37
  -8  -2 -10  145.70   12.68
   8   2  10  125.23   12.37
  -9  -2 -10  129.34   12.54
   9  -2  10  125.12   13.02
  -8  -3  10    7.84    4.21
   8  -3 -10    5.24    3.44
   7  -3 -10    0.97    2.77
  -7  -3  10    2.33    3.21
   7   3 -10   -1.23    2.04
   6  -3 -10  334.56   16.67
  -6  -3  10  310.13   16.46
   6   3 -10  345.88   18.49
   6   3 -10  342.84   15.86
  -6   3  10  334.16   15.05
  -5  -3  10  313.85   15.48
   5  -3 -10  282.80   14.57
   5   3 -10  303.07   13.98
  -5   3  10  324.27   13.61
   5   3 -10  294.68   16.11
   4  -3 -10  621.76   23.07
  -4  -3  10  663.09   24.18
  -4   3  10  658.54   21.79
   4   3 -10  660.91   25.15
   4   3 -10  651.22   22.27
   3  -3 -10  157.91    8.91
  -3   3  10  162.18    8.15
   3   3 -10  178.63   10.58
   3   3 -10  182.08    8.68
   2  -3 -10  657.17   20.66
  -2  -3  10  626.41   21.54
   2   3 -10  581.20   19.22
  -2   3  10  598.78   19.29
   2   3 -10  606.72   22.02
   2   3 -10  585.65   18.00
   1  -3 -10  240.23   10.79
  -1  -3  10  251.75   11.04
   1  -3 -10  269.54   10.52
  -1  -3  10  248.28   11.72
  -1  -3  10  238.39   10.35
   1   3 -10  258.88    9.80
   1   3 -10  250.03   11.75
   0  -3 -10  218.18    6.74
   0  -3 -10  204.66    8.74
   0  -3  10  230.30    9.74
   0  -3  10  216.59    9.20
   0  -3  10  237.66   10.99
   0  -3  10  223.01    6.40
   0  -3 -10  219.53    9.81
   0   3 -10  223.15   10.51
   0   3  10  214.21    9.13
   0   3 -10  232.24    8.80
   0   3  10  212.99    9.15
   1  -3  10   10.59    2.24
  -1  -3 -10    9.92    2.27
  -1  -3 -10   11.04    2.07
   1  -3  10    7.49    2.36
   1  -3  10    6.80    1.77
  -1  -3 -10   11.64    2.87
  -1   3 -10    9.67    1.98
   1   3  10    9.10    2.18
   1   3  10    9.50    2.06
   2  -3  10  240.09   10.02
  -2  -3 -10  237.50   10.83
  -2  -3 -10  250.03    9.71
   2   3  10  244.10   10.59
  -2   3 -10  250.36    9.87
   2   3  10  228.91   10.00
   2   3  10  246.05    8.63
  -3  -3 -10  225.04   10.35
  -3  -3 -10  223.28    9.66
   3  -3  10  217.30    9.91
   3   3  10  230.96   10.68
  -3   3 -10  226.53    9.63
   3   3  10  231.96   10.04
   3   3  10  223.18    9.08
  -4  -3 -10  690.76   22.07
   4  -3  10  659.65   17.73
   4  -3  10  662.54   22.30
  -4   3 -10  670.67   21.56
   4   3  10  644.04   22.89
   4   3  10  641.84   21.40
  -5  -3 -10  592.26   21.42
   5  -3  10  596.24   21.83
   5   3  10  631.35   22.68
  -5   3 -10  624.94   20.99
   6  -3  10    6.23    2.73
  -6  -3 -10    2.30    2.22
  -6   3 -10    8.17    2.91
   6   3  10    3.81    2.58
   7  -3  10   58.16    7.47
  -7  -3 -10   56.68    7.29
   7   3  10   60.83    7.94
   8  -3  10   74.69    9.36
  -8  -3 -10  108.46   10.67
  -8  -4  10   -1.57    2.31
   8  -4 -10    3.72    3.75
   7  -4 -10  182.81   12.77
  -7  -4  10  182.39   12.90
   6  -4 -10  432.83   19.33
  -6  -4  10  379.29   18.80
  -5  -4  10  447.11   19.71
   5  -4 -10  427.83   18.88
   5   4 -10  454.10   21.41
   5   4 -10  444.68   17.44
  -4  -4  10  893.88   30.80
   4  -4 -10  910.74   30.04
   4   4 -10  919.80   28.28
  -4   4  10  885.98   27.14
   4   4 -10  908.10   32.98
   3  -4 -10    0.85    1.52
  -3  -4  10   -0.04    1.26
   3   4 -10    2.75    2.30
  -3   4  10    0.10    0.68
   3   4 -10    0.85    1.15
  -3   4  10    0.58    1.28
  -2  -4  10  137.61    9.04
  -2  -4  10  169.92    9.13
  -2  -4  10  136.15    7.81
   2  -4 -10  142.87    8.26
   2  -4 -10  144.85    7.87
   2   4 -10  138.87    7.47
   2   4 -10  163.88   10.04
  -2   4  10  148.58    6.47
  -2   4  10  142.90    7.65
  -1  -4  10   88.12    6.12
  -1  -4  10   86.97    5.70
   1  -4 -10  110.41    6.06
  -1  -4  10   77.38    7.65
   1  -4 -10   87.54    6.04
   1   4 -10  101.06    4.84
  -1   4  10   92.75    4.67
  -1   4  10  104.80    6.35
   1   4 -10   92.33    8.60
   0  -4  10    1.12    0.78
   0  -4 -10   -1.48    0.69
   0  -4  10   -0.47    0.84
   0  -4 -10    1.48    1.10
   0  -4  10    1.16    1.07
   0  -4 -10    1.27    0.81
   0  -4  10    1.67    1.66
   0   4  10    0.26    1.12
   0   4 -10    2.56    1.01
   1  -4  10    1.14    1.06
   1  -4  10    1.23    1.09
  -1  -4 -10    2.05    1.13
  -1  -4 -10    2.42    1.38
  -1  -4 -10    4.69    2.15
   1  -4  10    1.25    1.47
   1   4  10    1.52    1.07
  -1   4 -10    1.78    0.96
   1   4  10   -0.27    1.03
   2  -4  10  496.20   16.19
   2  -4  10  506.05   16.78
  -2  -4 -10  511.94   19.01
  -2  -4 -10  493.01   16.24
  -2  -4 -10  487.76   21.96
   2   4  10  523.01   15.92
  -2   4 -10  491.83   15.72
   2   4  10  540.63   18.33
   2   4  10  428.36   16.46
  -3  -4 -10  199.05    9.10
   3  -4  10  203.79    9.48
  -3  -4 -10  194.64   10.28
   3   4  10  211.83    9.41
   3   4  10  226.49   10.33
   3   4  10  184.61    9.86
   4  -4  10   17.83    2.23
  -4  -4 -10   14.87    3.01
  -4  -4 -10   24.50    3.80
   4  -4  10   19.20    3.54
   4   4  10   21.80    4.08
   4   4  10   19.87    3.59
  -4   4 -10   12.99    2.88
  -5  -4 -10    2.05    1.50
  -5  -4 -10   -0.56    1.58
   5  -4  10    1.19    1.76
   5   4  10    3.19    2.38
   5   4  10    6.98    2.60
   6  -4  10    0.25    1.76
  -6  -4 -10    0.94    1.88
   6   4  10    0.06    1.67
   7  -4  10    2.78    2.85
  -7  -4 -10    5.36    2.97
   7   4  10    5.65    3.30
  -8  -4 -10   23.24    5.56
   8  -4  10   23.09    5.56
   8  -5 -10   19.59    5.70
  -8  -5  10   32.09    7.22
   7  -5 -10    7.58    3.73
  -7  -5  10    7.94    4.09
   6  -5 -10   57.75    7.73
  -6  -5  10   63.18    8.51
  -6   5  10   64.94    6.84
  -5  -5  10    5.11    2.84
   5  -5 -10    4.49    2.77
  -5   5  10    5.39    2.29
   5   5 -10    2.70    2.94
   4  -5 -10  673.21   24.56
  -4  -5  10  730.79   26.05
  -4   5  10  668.02   23.42
   4   5 -10  693.23   28.17
   3  -5 -10   13.15    3.21
  -3  -5  10   16.96    4.00
   3   5 -10   14.84    4.19
  -3   5  10   22.92    3.91
   3   5 -10   19.86    2.81
   2  -5 -10   70.02    6.38
   2  -5 -10   74.52    7.05
  -2  -5  10   72.66    6.71
  -2  -5  10   62.08    7.34
  -2   5  10   63.28    6.32
   2   5 -10   63.84    3.53
   2   5 -10   61.07    7.65
  -1  -5  10  168.82   10.77
  -1  -5  10  164.97    7.00
   1  -5 -10  178.51    8.23
  -1  -5  10  162.55    8.70
  -1  -5  10  163.21    8.23
   1  -5 -10  171.41    7.98
   1  -5 -10  158.74    8.48
  -1   5  10  172.62    9.23
   1   5 -10  162.03   10.36
   0  -5 -10   57.89    4.09
   0  -5 -10   56.59    4.79
   0  -5 -10   55.45    5.48
   0  -5  10   55.85    5.18
   0  -5  10   50.89    3.73
   0  -5  10   52.40    5.12
   0  -5  10   51.64    6.90
   0   5  10   42.70    5.20
   1  -5  10   24.73    4.99
  -1  -5 -10   27.87    3.16
  -1  -5 -10   27.87    3.73
  -1  -5 -10   24.25    4.69
   1  -5  10   29.09    3.55
  -1  -5 -10   27.60    3.28
   1  -5  10   30.07    3.83
   1   5  10   37.13    5.08
   2  -5  10    2.71    1.36
   2  -5  10    3.94    1.58
  -2  -5 -10    1.12    1.82
   2  -5  10    2.57    1.88
  -2  -5 -10    1.84    1.29
  -2  -5 -10    4.84    1.84
   2   5  10    0.72    1.22
   2   5  10   -0.16    1.26
   2   5  10    1.37    1.30
   3  -5  10  269.57   11.29
  -3  -5 -10  278.15   11.95
   3  -5  10  237.53   10.60
  -3  -5 -10  280.69   11.21
  -3  -5 -10  272.73   13.22
   3  -5  10  278.61   10.99
   3   5  10  285.69   11.94
   3   5  10  209.26   10.49
   3   5  10  245.16   12.47
  -4  -5 -10   54.08    5.83
  -4  -5 -10   49.83    6.41
   4  -5  10   33.72    4.72
   4  -5  10   43.74    4.04
   4   5  10   50.12    5.93
  -5  -5 -10   21.59    3.99
   5  -5  10   18.43    3.81
   5   5  10   23.76    4.61
   6  -5  10  125.28    9.09
  -6  -5 -10  131.89    9.08
   6   5  10  119.16   11.21
   7  -5  10   12.90    4.17
  -7  -5 -10    7.47    3.26
   7   5  10    8.14    3.46
   8  -5  10    3.01    3.13
  -8  -5 -10    0.46    2.56
   7  -6 -10    7.40    3.72
  -7  -6  10    6.23    3.83
  -6  -6  10   28.67    5.90
   6  -6 -10   21.83    5.02
  -6   6  10   27.67    4.96
  -5  -6  10 1017.14   34.81
   5  -6 -10  988.18   33.75
  -5   6  10  945.91   32.06
   4  -6 -10 1057.66   34.71
  -4  -6  10 1128.33   36.31
   4   6 -10 1096.66   40.15
  -4   6  10 1044.39   34.38
   3  -6 -10  514.64   19.28
  -3   6  10  524.37   20.02
   3   6 -10  489.83   23.03
   2  -6 -10  107.27    6.78
  -2  -6  10   69.68    8.49
  -2   6  10  107.36    9.33
   2   6 -10   79.55    9.25
   1  -6 -10    1.09    1.21
  -1  -6  10   -0.10    1.28
  -1  -6  10    1.40    2.01
   1  -6 -10    0.97    1.48
  -1  -6  10    0.67    1.20
  -1  -6  10    1.59    1.49
   1  -6 -10    0.91    1.34
   1   6 -10   -1.14    1.58
  -1   6  10   -0.56    1.32
   0  -6  10   55.16    5.55
   0  -6  10   55.82    7.93
   0  -6 -10   51.10    4.67
   0  -6 -10   55.00    5.60
   0  -6  10   46.35    4.84
   0  -6  10   56.00    5.29
   0  -6 -10   62.35    5.73
   0   6  10   64.86    7.48
   1  -6  10   28.23    3.74
   1  -6  10   26.35    3.42
  -1  -6 -10   26.36    3.77
   1  -6  10   22.35    4.81
  -1  -6 -10   21.60    4.95
  -1  -6 -10   22.68    3.30
  -1  -6 -10   26.73    3.32
   1   6  10   32.42    5.37
   2  -6  10  965.11   28.40
  -2  -6 -10  951.51   27.94
   2  -6  10 1001.01   35.01
   2  -6  10  909.65   29.92
  -2  -6 -10  970.91   33.27
   2   6  10  931.43   31.84
  -3  -6 -10  597.05   23.24
   3  -6  10  589.27   20.16
   3  -6  10  610.62   19.98
  -3  -6 -10  551.68   19.34
   3   6  10  579.40   20.94
   3   6  10  572.15   22.55
   4  -6  10  236.47   10.07
  -4  -6 -10  242.04   11.28
   4  -6  10  224.91   11.19
  -4  -6 -10  247.26   13.25
   4   6  10  229.61   12.40
  -5  -6 -10   69.30    7.04
   5  -6  10   59.01    6.78
   5   6  10   60.53    7.62
   6  -6  10   18.84    4.31
  -6  -6 -10   19.73    4.30
  -7  -6 -10   95.10   10.02
   7  -6  10   70.21    8.55
  -6  -7  10   11.89    4.25
   6  -7 -10   16.80    4.77
  -5  -7  10    4.76    3.45
   5  -7 -10   -0.80    2.14
  -5   7  10    4.82    2.89
   4  -7 -10  252.73   12.97
  -4  -7  10  236.34   13.42
  -4   7  10  245.61   13.37
   3  -7 -10  103.55    7.48
  -3   7  10  105.43    9.83
   2  -7 -10    1.94    1.60
   2  -7 -10   -2.29    1.51
  -2   7  10   -0.16    1.70
   2   7 -10   -0.75    1.80
   1  -7 -10   -0.70    1.14
   1  -7 -10   -0.05    1.40
  -1  -7  10   -0.95    1.20
  -1  -7  10    0.18    1.22
  -1   7  10   -0.45    1.38
   0  -7 -10  359.56   13.01
   0  -7  10  338.11   14.13
   0  -7 -10  352.05   14.75
   0  -7  10  357.82   14.06
   0   7  10  380.26   17.22
  -1  -7 -10  166.59    7.82
  -1  -7 -10  159.21   11.75
   1  -7  10  171.95    8.46
  -1  -7 -10  179.14    9.31
  -2  -7 -10  421.86   15.14
   2  -7  10  435.50   15.54
  -2  -7 -10  442.42   20.30
   2  -7  10  439.71   18.07
   2   7  10  405.33   18.94
   3  -7  10  178.79    9.89
   3  -7  10  188.97    9.29
  -3  -7 -10  194.78   12.53
  -3  -7 -10  178.97    9.06
   3   7  10  168.64   10.09
   4  -7  10   14.97    3.46
  -4  -7 -10   14.61    4.35
  -4  -7 -10   14.91    3.39
   4   7  10   11.98    3.67
  -5  -7 -10   34.72    5.43
   5  -7  10   47.18    6.25
   6  -7  10    5.53    3.06
  -6  -7 -10    5.37    2.96
   6  -8 -10   86.50    9.97
  -6  -8  10  102.05   11.70
   5  -8 -10  577.65   22.85
  -5  -8  10  520.68   22.92
  -5   8  10  498.52   22.49
  -4  -8  10   92.69    9.74
   4  -8 -10   98.64    9.30
  -4   8  10   72.07    9.07
   3  -8 -10  329.63   14.45
   3  -8 -10  297.26   16.21
  -3   8  10  309.27   16.31
   2  -8 -10   14.92    4.12
  -2  -8  10   14.32    3.27
   2  -8 -10   15.38    3.27
  -2   8  10   17.65    4.75
   1  -8 -10    5.91    2.21
  -1  -8  10    8.34    2.66
   1  -8 -10    3.02    2.88
  -1  -8  10   10.01    2.87
  -1   8  10   11.55    4.07
   0  -8 -10  193.17   11.26
   0  -8 -10  217.92    9.51
   0  -8  10  212.61   11.03
   0  -8  10  207.28   10.21
   0   8  10  211.74   13.19
   1  -8  10  470.40   17.14
  -1  -8 -10  460.31   18.69
   1  -8  10  481.16   19.23
  -1  -8 -10  490.09   23.17
  -1  -8 -10  501.60   16.55
   1   8  10  460.13   21.30
   2  -8  10  158.47    8.45
  -2  -8 -10  180.06   12.88
  -2  -8 -10  150.36    7.98
  -3  -8 -10    6.44    2.40
  -3  -8 -10    8.23    3.80
   3  -8  10    3.44    2.16
   4  -8  10    3.62    2.32
  -4  -8 -10    4.88    2.41
  -4  -8 -10    3.22    3.29
   5  -8  10    3.46    2.52
  -5  -8 -10    0.21    2.02
   6  -8  10    0.35    2.33
  -6  -8 -10    5.47    3.26
  -4  -9  10   57.79    7.77
   4  -9 -10   56.57    7.13
   3  -9 -10  142.45    9.11
  -3  -9  10  131.73    9.44
   2  -9 -10    3.02    2.11
  -2  -9  10    7.37    2.80
   1  -9 -10    2.93    2.04
  -1  -9  10    7.00    2.74
   0  -9 -10  112.34    6.70
   0  -9  10  105.02    7.25
   0  -9 -10   90.13   11.59
   0  -9  10  115.53    8.53
   1  -9  10   49.04    6.85
  -1  -9 -10   47.67    4.95
   1  -9  10   54.51    5.83
  -1  -9 -10   48.70    8.48
  -2  -9 -10   19.03    6.30
  -2  -9 -10   20.13    3.57
   2  -9  10   20.78    3.68
   3  -9  10    1.74    1.85
  -3  -9 -10    3.94    2.01
  -3  -9 -10    0.26    3.18
  -4  -9 -10   10.47    4.51
  -4  -9 -10    6.35    2.61
   4  -9  10    5.91    2.79
  -3 -10  10   55.86    7.44
   3 -10 -10   58.26    6.83
   2 -10 -10   13.62    3.40
   1 -10 -10   65.56    6.49
   0 -10 -10   52.14    5.71
   0 -10 -10   33.62    7.77
   0 -10  10   55.90    6.26
  -1 -10 -10   95.34   12.50
   1 -10  10  112.40    7.53
  -1 -10 -10  105.20    6.75
  -2 -10 -10   14.69    3.18
   2 -10  10   13.07    3.31
  -2 -10 -10    5.14    4.40
  -3 -10 -10   43.78    8.64
  -3 -10 -10   48.64    5.87
   3 -10  10   56.16    6.48
  -9   0  11   50.51    8.44
   9   0 -11   43.77    8.27
  -8   0  11    0.16    2.38
   8   0 -11    4.96    3.05
   7   0 -11   -0.75    1.86
  -7   0  11    3.51    2.83
   6   0 -11    0.14    1.98
  -6   0  11   -0.12    1.86
  -5   0  11   62.82    7.53
   5   0 -11   42.89    6.16
  -4   0  11    0.19    1.49
   4   0 -11   -1.04    1.09
   3   0 -11   60.67    6.22
   2   0 -11   -0.80    1.45
   2   0 -11    0.37    1.09
   1   0 -11   45.12    4.84
  -1   0  11   30.25    4.14
   1   0 -11   34.42    3.40
   0   0 -11    1.10    0.69
   0   0 -11    0.15    0.86
   0   0  11    0.87    0.69
   0   0  11    0.91    1.14
  -1   0 -11  476.04   13.75
   1   0  11  471.63   14.40
  -1   0 -11  478.54   16.00
   1   0  11  475.08   16.77
   2   0  11   -0.33    0.69
   2   0  11   -0.21    1.16
  -2   0 -11   -0.87    0.68
  -3   0 -11  206.51    9.13
   3   0  11  188.11    9.56
  -4   0 -11   -1.65    1.00
   4   0  11    0.44    0.73
   4   0  11   -0.05    1.15
  -5   0 -11 1593.21   46.13
   5   0  11 1633.80   47.61
   6   0  11    1.83    2.42
  -6   0 -11   -0.81    1.66
   7   0  11   60.32    7.62
  -7   0 -11   41.95    6.14
   8   0  11    0.43    2.46
  -8   0 -11    0.06    2.51
  -9   0 -11   11.62    4.43
   9   0  11    9.52    4.48
   9  -1 -11    4.09    3.86
  -9  -1  11    1.53    3.90
   9   1 -11    1.65    3.54
   8  -1 -11    0.64    2.85
  -8  -1  11   11.82    4.54
  -8   1  11    8.83    3.74
   8   1 -11    5.18    3.73
  -7  -1  11    0.20    1.83
   7  -1 -11    1.31    2.67
  -7   1  11    0.33    2.12
   7   1 -11    0.42    2.11
  -6  -1  11  343.03   16.60
   6  -1 -11  324.21   16.25
  -6   1  11  308.85   15.44
   6   1 -11  335.86   16.19
  -5  -1  11   52.80    6.77
   5  -1 -11   60.54    7.43
  -5   1  11   58.20    6.87
   5   1 -11   76.58    8.24
   5   1 -11   71.30    7.63
   4  -1 -11   11.95    3.23
  -4  -1  11    8.61    2.85
  -4   1  11   14.73    3.40
   4   1 -11   11.71    3.01
   4   1 -11   11.96    2.93
   3  -1 -11  225.88   10.92
   3   1 -11  215.26   10.50
   3   1 -11  211.85   10.45
   2  -1 -11  291.17   12.38
   2   1 -11  303.32   12.20
   2   1 -11  291.90   12.23
   1  -1 -11   69.31    3.64
   1  -1 -11   68.09    5.00
  -1  -1  11   74.65    4.71
  -1  -1  11   62.77    6.17
   1   1 -11   67.83    4.73
  -1   1  11   76.81    6.69
   1   1 -11   73.93    5.14
   0  -1 -11   47.02    4.59
   0  -1  11   46.91    4.30
   0  -1  11   45.59    4.88
   0   1 -11   44.92    4.66
   0   1  11   48.52    5.13
   0   1 -11   50.69    4.49
   0   1 -11   46.22    1.85
  -1  -1 -11   19.38    2.65
   1  -1  11   21.12    2.89
  -1  -1 -11   14.92    2.54
   1  -1  11   15.37    2.85
  -1   1 -11   17.10    2.87
   1   1  11   14.75    2.76
   1   1  11   18.92    1.67
  -2  -1 -11  292.00   10.38
  -2  -1 -11  291.18   11.13
   2  -1  11  300.31   12.02
   2  -1  11  275.86    9.39
   2   1  11  279.23   11.94
  -2   1 -11  298.47   11.35
  -3  -1 -11  516.39   17.69
   3  -1  11  520.24   18.47
   3   1  11  532.93   18.92
  -3   1 -11  557.98   18.01
   3   1  11  521.93   16.04
   4  -1  11  323.08    9.30
  -4  -1 -11  352.17   13.44
   4  -1  11  327.96   13.94
   4   1  11  321.98   11.15
   4   1  11  321.32   14.01
  -4   1 -11  336.91   13.24
   5  -1  11   39.29    5.47
  -5  -1 -11   40.88    5.28
   5   1  11   41.76    5.73
  -5   1 -11   29.11    4.45
  -6  -1 -11  103.17    9.08
   6  -1  11   81.84    8.36
  -6   1 -11   90.08    8.17
   6   1  11   99.58    9.48
  -7  -1 -11    0.02    2.19
   7  -1  11    0.84    2.58
  -7   1 -11   -0.82    1.79
   7   1  11   -1.33    2.03
   8  -1  11   48.44    7.74
  -8  -1 -11   44.08    6.99
  -8   1 -11   41.97    6.72
   8   1  11   54.88    8.20
  -9  -1 -11    1.09    3.44
   9  -1  11    1.95    3.17
   9   1  11    2.36    3.62
   9  -2 -11   50.19    9.05
  -9  -2  11   49.08    8.80
   8  -2 -11   12.68    4.56
  -8  -2  11    9.28    4.05
   8   2 -11    6.47    3.48
  -7  -2  11   17.67    5.21
   7  -2 -11   12.21    4.31
   7   2 -11   18.17    5.09
  -7   2  11   15.75    4.32
   6  -2 -11    0.60    2.45
  -6  -2  11    0.26    2.42
   6   2 -11    5.10    3.30
  -6   2  11   -1.47    1.80
   6   2 -11    1.94    2.18
  -5  -2  11    2.01    2.36
   5  -2 -11    0.30    1.95
   5   2 -11    2.64    2.28
  -5   2  11    0.53    1.66
   5   2 -11    1.57    1.99
   4  -2 -11  213.43   11.51
  -4  -2  11  221.30   12.07
   4   2 -11  212.37   12.03
  -4   2  11  229.36   11.20
   4   2 -11  234.99   11.40
   3  -2 -11    9.72    2.72
   3   2 -11   16.59    3.79
  -3   2  11    7.56    2.32
   3   2 -11    7.90    2.49
   2  -2 -11  119.20    7.20
  -2  -2  11  114.02    6.97
   2   2 -11  121.39    7.55
   2   2 -11  125.13    7.02
   1  -2 -11  577.29   18.97
  -1  -2  11  555.49   19.67
  -1  -2  11  569.45   19.29
   1   2 -11  562.22   18.59
   1   2 -11  580.86   19.58
   1   2 -11  557.79   15.11
   0  -2  11  498.36   17.46
   0  -2 -11  484.89   16.46
   0  -2  11  494.34   17.49
   0   2  11  486.33   17.32
   0   2 -11  518.08   16.84
   0   2 -11  518.64   17.32
  -1  -2 -11    0.79    0.96
   1  -2  11   -0.26    0.87
  -1  -2 -11    0.20    0.96
   1  -2  11   -0.18    1.10
   1   2  11   -0.40    1.01
  -1   2 -11    0.35    0.96
   2  -2  11  160.51    8.02
  -2  -2 -11  145.62    7.46
  -2  -2 -11  157.81    7.47
  -2   2 -11  155.62    7.62
   2   2  11  166.11    7.30
   2   2  11  157.32    8.39
  -3  -2 -11  339.63   12.85
   3  -2  11  327.24   13.23
   3   2  11  337.77   13.91
   3   2  11  325.44   11.94
  -3   2 -11  332.96   12.81
   4  -2  11  318.97   13.74
  -4  -2 -11  349.57   13.52
   4   2  11  339.60   14.41
   4   2  11  310.70   11.98
  -4   2 -11  319.92   12.97
  -5  -2 -11  892.73   27.77
   5  -2  11  809.62   28.06
  -5   2 -11  844.90   27.11
   5   2  11  817.10   28.38
   6  -2  11  312.95   15.24
  -6  -2 -11  318.92   14.62
  -6   2 -11  321.75   14.34
   6   2  11  322.80   15.61
  -7  -2 -11   64.48    7.93
   7  -2  11   49.68    7.24
  -7   2 -11   56.97    7.11
   7   2  11   64.91    8.36
  -8  -2 -11   -1.08    2.46
   8  -2  11    1.87    2.79
   8   2  11    0.34    2.93
  -8  -3  11   13.97    5.19
   8  -3 -11   16.74    5.27
   7  -3 -11   45.05    7.50
  -7  -3  11   53.06    8.30
   7   3 -11   47.75    8.13
  -6  -3  11  145.32   12.78
   6  -3 -11  159.22   11.05
   6   3 -11  150.47   20.80
   6   3 -11  142.06    9.95
  -6   3  11  151.83    9.77
  -5  -3  11  204.31   12.45
   5  -3 -11  200.00   11.93
   5   3 -11  217.39   11.40
  -5   3  11  216.88   10.96
   5   3 -11  196.05   12.86
   4  -3 -11    9.23    2.99
   4   3 -11    8.06    2.56
   4   3 -11    5.37    2.77
  -4   3  11    6.27    2.18
   3  -3 -11  236.14   11.53
  -3   3  11  241.75   10.62
   3   3 -11  238.53   10.73
   3   3 -11  240.80   12.77
   2  -3 -11   10.07    2.66
  -2  -3  11   12.71    2.94
  -2  -3  11   12.75    3.09
   2   3 -11    9.08    2.74
   2   3 -11   16.33    2.30
   2   3 -11   12.73    2.62
  -2   3  11   13.80    2.69
  -1  -3  11  281.37   12.71
   1  -3 -11  279.96   11.32
   1  -3 -11  257.43   11.73
  -1  -3  11  274.98   12.04
   1   3 -11  278.92   10.75
   1   3 -11  269.14   12.52
   0  -3  11  767.04   24.30
   0  -3 -11  827.00   25.37
   0  -3  11  809.55   25.10
   0  -3  11  789.47   26.24
   0  -3 -11  797.36   24.02
   0   3 -11  797.49   23.72
   0   3  11  811.16   24.30
   0   3  11  787.08   24.45
   0   3 -11  793.26   25.91
  -1  -3 -11  410.29   13.78
   1  -3  11  379.04   13.62
  -1  -3 -11  350.94   14.77
   1  -3  11  409.77   14.50
   1  -3  11  411.31   15.98
  -1   3 -11  412.87   13.86
   1   3  11  380.07   14.41
   1   3  11  377.92   14.01
   2  -3  11   57.14    5.28
  -2  -3 -11   51.12    4.74
  -2  -3 -11   54.47    5.74
   2   3  11   44.65    3.00
   2   3  11   59.60    5.84
  -2   3 -11   53.04    5.05
   2   3  11   42.04    4.51
  -3  -3 -11  150.27    8.16
   3  -3  11  138.88    7.78
  -3  -3 -11  143.86    7.50
   3   3  11  140.51    8.33
  -3   3 -11  138.18    7.46
   3   3  11  143.30    6.72
   3   3  11  156.56    7.88
   4  -3  11  592.09   16.47
  -4  -3 -11  596.56   20.35
   4  -3  11  586.38   20.84
   4   3  11  624.73   21.93
   4   3  11  606.21   20.10
  -4   3 -11  562.73   19.86
  -5  -3 -11    1.65    1.95
   5  -3  11   -0.91    1.46
   5   3  11    1.12    1.87
  -5   3 -11    0.07    1.42
   6  -3  11   26.65    4.90
  -6  -3 -11   24.50    4.50
   6   3  11   31.24    5.81
  -7  -3 -11    1.54    2.41
   7  -3  11    0.42    2.14
   7   3  11    3.00    2.75
  -8  -3 -11  111.15   10.95
   8  -3  11  114.62   11.71
  -8  -4  11   -1.79    2.71
   8  -4 -11    0.71    2.84
  -7  -4  11  128.96   12.75
   7  -4 -11  115.02   12.14
  -7   4  11  116.45   11.66
  -6  -4  11    5.96    3.39
   6  -4 -11    8.73    3.76
  -5  -4  11    5.50    3.17
   5  -4 -11    5.00    3.01
   5   4 -11    2.97    3.02
   5   4 -11    8.02    2.89
   4  -4 -11  453.13   18.81
  -4   4  11  468.44   16.56
   4   4 -11  491.80   21.63
   4   4 -11  457.16   17.24
  -3  -4  11    2.81    1.78
   3  -4 -11    1.35    1.58
   3   4 -11   -0.21    1.83
   3   4 -11    6.52    1.98
  -3   4  11    2.12    1.44
  -2  -4  11  226.70   12.11
  -2  -4  11  238.22   11.73
   2  -4 -11  249.85   10.98
   2  -4 -11  208.33   10.85
   2   4 -11  233.97   12.61
   2   4 -11  229.64    9.35
  -2   4  11  230.68   10.37
   2   4 -11  215.14    9.24
   1  -4 -11  308.22   13.20
   1  -4 -11  329.77   12.68
  -1  -4  11  313.68   13.42
  -1  -4  11  301.74   12.64
  -1  -4  11  346.89   15.33
   1   4 -11  338.05   15.11
  -1   4  11  330.82   13.06
  -1   4  11  318.12   11.33
   0  -4 -11  727.31   21.87
   0  -4  11  737.50   22.41
   0  -4  11  715.09   19.14
   0  -4  11  695.90   22.66
   0  -4  11  696.49   25.11
   0  -4 -11  697.70   19.56
   0  -4 -11  666.23   22.71
   0   4 -11  674.68   20.34
   0   4  11  715.52   23.00
  -1  -4 -11   14.96    2.94
  -1  -4 -11   12.82    3.12
   1  -4  11   14.02    2.59
   1  -4  11   14.39    2.78
   1  -4  11    9.37    2.90
  -1  -4 -11   17.57    2.76
   1   4  11   14.49    3.07
  -1   4 -11   17.11    2.52
  -2  -4 -11  202.56    8.65
   2  -4  11  195.00    8.41
   2  -4  11  172.80    8.59
   2  -4  11  189.86   10.87
  -2  -4 -11  190.54   10.29
   2   4  11  177.56    7.39
   2   4  11  168.39    8.77
   2   4  11  178.67    9.34
  -3  -4 -11  784.05   24.94
  -3  -4 -11  844.21   27.10
   3  -4  11  836.93   25.75
   3   4  11  851.65   24.92
   3   4  11  769.26   25.97
   3   4  11  753.73   25.85
   4  -4  11  110.03    5.18
   4  -4  11  115.53    7.43
  -4  -4 -11   93.35    6.61
   4   4  11  120.66    7.29
  -4   4 -11  103.99    6.60
   4   4  11  118.64    7.98
   4   4  11   94.58    7.07
  -5  -4 -11   22.11    4.16
   5  -4  11   22.84    4.16
   5   4  11   15.85    3.96
   5   4  11   16.55    3.62
   6  -4  11  223.20   12.41
  -6  -4 -11  222.03   12.02
   6   4  11  207.10   12.00
  -7  -4 -11    1.12    2.25
   7  -4  11   -2.21    1.85
   7   4  11    2.18    2.57
   8  -4  11   13.66    4.56
  -8  -4 -11   22.32    5.73
   8  -5 -11   17.73    5.47
  -8  -5  11   21.86    6.22
  -7  -5  11   15.42    5.00
   7  -5 -11   19.90    5.49
  -6  -5  11    2.54    2.76
   6  -5 -11   -2.27    1.88
  -6   5  11    0.27    1.74
  -5  -5  11   26.75    5.50
   5  -5 -11   24.00    4.92
  -5   5  11   21.93    4.25
   4  -5 -11  187.98   10.88
  -4   5  11  173.42    9.73
   4   5 -11  170.21   12.58
  -3  -5  11  142.97    9.95
   3  -5 -11  147.46    8.86
   3   5 -11  101.82    9.24
  -3   5  11  139.34    8.40
   3   5 -11  161.54   13.54
  -2  -5  11    8.29    3.22
   2  -5 -11    6.42    2.37
   2  -5 -11    5.76    2.22
  -2  -5  11    6.23    2.54
  -2  -5  11    4.94    2.24
   2   5 -11    3.91    1.38
   2   5 -11    5.16    2.79
  -2   5  11    7.77    2.40
  -1  -5  11   29.39    4.50
  -1  -5  11   33.19    5.83
  -1  -5  11   23.36    3.81
   1  -5 -11   25.59    4.05
   1  -5 -11   27.35    3.44
   1  -5 -11   28.59    3.88
  -1   5  11   23.99    3.88
   1   5 -11   26.78    4.97
   0  -5  11   65.91    7.74
   0  -5  11   76.62    6.61
   0  -5  11   58.89    3.82
   0  -5  11   64.72    5.84
   0  -5 -11   73.97    4.87
   0  -5 -11   69.33    4.37
   0  -5 -11   65.77    6.28
   0   5  11   66.11    6.81
  -1  -5 -11  223.33   12.47
   1  -5  11  246.05   10.50
  -1  -5 -11  246.68    9.81
  -1  -5 -11  238.18   10.58
   1  -5  11  247.25   13.59
   1  -5  11  226.62    9.81
  -1  -5 -11  239.53    8.71
   1   5  11  241.79   11.77
  -2  -5 -11  561.03   18.49
   2  -5  11  614.27   23.69
   2  -5  11  568.08   19.07
   2  -5  11  556.71   18.27
  -2  -5 -11  585.19   22.21
  -2  -5 -11  522.75   18.97
   2   5  11  585.38   21.13
   2   5  11  563.80   18.30
   2   5  11  564.75   17.93
  -3  -5 -11    3.81    1.77
  -3  -5 -11    2.71    2.22
   3  -5  11    2.63    1.71
   3  -5  11    0.84    1.38
   3   5  11    0.17    1.07
   3   5  11    2.16    1.67
   3   5  11    2.45    2.49
  -4  -5 -11   76.85    6.95
   4  -5  11   94.70    6.89
   4  -5  11   87.59    5.21
  -4  -5 -11   98.00    9.28
   4   5  11  111.71    7.55
  -5  -5 -11    1.26    1.96
   5  -5  11   -0.10    1.71
   5   5  11   -0.43    1.64
   6  -5  11    4.00    2.48
  -6  -5 -11    1.09    2.19
   6   5  11    3.11    2.50
   7  -5  11  135.52   11.93
  -7  -5 -11  125.89   11.52
   8  -5  11   65.16    8.96
  -8  -5 -11   50.35    7.64
   7  -6 -11    1.51    2.89
  -7  -6  11    0.91    3.11
   6  -6 -11   -1.13    2.26
  -6  -6  11   -2.36    2.13
  -6   6  11   -1.37    1.65
  -5  -6  11  190.19   12.52
   5  -6 -11  180.30   11.78
  -5   6  11  190.27   11.11
   4  -6 -11  317.01   15.21
  -4   6  11  324.41   14.94
   3  -6 -11  111.89    7.84
  -3   6  11   99.85    9.13
   3   6 -11   99.59   11.17
   2  -6 -11   15.28    3.35
  -2  -6  11   12.70    4.33
  -2   6  11   12.55    3.36
   2   6 -11   14.93    4.32
   1  -6 -11  392.66   14.62
  -1  -6  11  362.12   13.18
  -1  -6  11  405.21   19.24
   1  -6 -11  371.13   14.68
   1  -6 -11  382.15   15.45
  -1  -6  11  345.63   14.81
  -1  -6  11  427.95   16.17
  -1   6  11  410.89   16.94
   1   6 -11  404.74   18.80
   0  -6  11    1.75    1.73
   0  -6 -11    0.35    1.10
   0  -6  11    1.41    1.27
   0  -6  11   -0.06    0.90
   0  -6  11   -0.05    1.85
   0  -6 -11    1.67    1.46
   0  -6 -11    0.64    1.32
   0   6  11    0.71    1.63
  -1  -6 -11   28.17    3.67
   1  -6  11   24.00    3.73
   1  -6  11   21.08    5.26
   1  -6  11   23.08    3.41
  -1  -6 -11   29.13    3.54
  -1  -6 -11   25.36    4.67
  -1  -6 -11   33.18    6.00
   1   6  11   27.16    4.84
   2  -6  11  455.26   17.68
  -2  -6 -11  474.87   20.39
  -2  -6 -11  456.54   15.98
   2  -6  11  455.51   21.32
   2  -6  11  453.47   16.44
   2   6  11  449.38   19.16
  -3  -6 -11  910.85   27.96
  -3  -6 -11  950.09   32.13
   3  -6  11  864.39   28.15
   3  -6  11  917.96   28.32
   3   6  11  893.98   28.68
   3   6  11  892.05   31.10
  -4  -6 -11   75.40    8.81
   4  -6  11   76.50    7.31
  -4  -6 -11   74.15    7.07
   4   6  11   83.37    8.17
   5  -6  11    9.67    3.19
  -5  -6 -11    8.02    2.96
   5   6  11   11.95    3.89
   6  -6  11    1.05    2.38
  -6  -6 -11    2.27    2.39
  -7  -6 -11    9.34    3.72
   7  -6  11    5.44    3.48
  -6  -7  11   30.53    6.43
   6  -7 -11   25.11    5.80
  -5  -7  11  105.67   11.07
   5  -7 -11   91.37    9.87
  -5   7  11  103.43    9.91
   4  -7 -11  214.46   12.17
  -4  -7  11  216.44   12.94
  -4   7  11  216.09   12.59
   3  -7 -11  128.84    8.67
  -3   7  11  124.92   11.00
   2  -7 -11   90.04    7.84
   2  -7 -11   85.98    8.14
   2   7 -11   78.03   10.25
  -2   7  11   79.06    8.54
  -1  -7  11    1.61    1.72
   1  -7 -11    1.45    1.78
   1  -7 -11    0.66    1.29
  -1  -7  11    1.61    1.46
  -1   7  11    3.41    2.39
   0  -7 -11  192.95    8.96
   0  -7  11  203.13    9.96
   0  -7 -11  170.62    9.44
   0  -7  11  188.35    9.28
   0   7  11  174.43   11.25
  -1  -7 -11    2.36    1.56
  -1  -7 -11    0.20    2.40
   1  -7  11    0.31    1.05
  -1  -7 -11    0.59    1.41
   1  -7  11    1.00    1.52
   1   7  11    0.44    1.89
  -2  -7 -11    1.31    1.51
  -2  -7 -11   -0.01    2.61
   2  -7  11    0.68    1.43
   2   7  11    4.04    2.79
  -3  -7 -11    6.17    2.23
  -3  -7 -11    6.73    3.69
   3  -7  11    3.67    2.55
   3  -7  11    3.38    2.08
   3   7  11    5.65    2.60
  -4  -7 -11  103.63    7.38
   4  -7  11  101.38    7.40
  -4  -7 -11  105.71   10.87
   5  -7  11   48.81    6.49
  -5  -7 -11   44.56    6.09
  -6  -7 -11   16.69    4.44
   6  -7  11   17.25    4.54
  -5  -8  11    6.96    3.73
   5  -8 -11    9.21    3.91
  -5   8  11    6.53    3.24
   4  -8 -11   36.62    5.87
  -4  -8  11   45.00    7.03
  -4   8  11   34.24    6.41
   3  -8 -11  209.32   14.33
   3  -8 -11  229.89   11.94
  -3   8  11  219.85   13.52
   2  -8 -11   64.23    7.76
   2  -8 -11   62.63    6.72
  -2   8  11   53.47    7.97
   1  -8 -11  224.01   12.49
  -1  -8  11  209.36   11.24
  -1  -8  11  220.78   10.64
   1  -8 -11  221.46   10.52
  -1   8  11  212.94   13.35
   0  -8  11    3.79    2.13
   0  -8 -11    3.67    1.88
   0  -8  11    3.88    2.01
   0   8  11    1.78    2.28
   1  -8  11   34.87    5.33
  -1  -8 -11   22.74    3.63
   1  -8  11   23.20    3.96
  -1  -8 -11   29.28    6.53
   1   8  11   27.44    5.95
   2  -8  11  214.64   10.33
  -2  -8 -11  184.71   13.45
  -2  -8 -11  200.98    9.64
   3  -8  11   99.36    7.11
  -3  -8 -11  105.62    7.11
  -3  -8 -11  116.29   12.63
  -4  -8 -11  409.75   20.10
  -4  -8 -11  387.61   16.17
   4  -8  11  380.86   16.20
   5  -8  11   85.14    8.62
  -5  -8 -11   93.91    8.85
  -4  -9  11    7.13    3.63
   4  -9 -11   20.19    4.79
   3  -9 -11    4.57    2.66
   2  -9 -11   39.28    5.47
  -1  -9  11  109.91    9.44
   1  -9 -11  100.78    7.13
  -1  -9  11  113.93    7.93
   0  -9  11   30.67    4.88
   0  -9 -11   25.74    4.11
   0  -9 -11   18.99    6.00
   0  -9  11   21.49    4.39
   1  -9  11   44.65    5.54
   1  -9  11   36.88    5.83
  -1  -9 -11   30.71    7.16
  -1  -9 -11   44.16    5.05
   2  -9  11  122.35    8.00
  -2  -9 -11  117.14   13.15
  -2  -9 -11  115.48    7.30
   3  -9  11   74.32    7.55
  -3  -9 -11   98.30   12.03
  -3  -9 -11   77.59    7.35
  -4  -9 -11   15.31    5.14
   4  -9  11   20.72    4.28
  -4  -9 -11   15.84    3.66
   2 -10 -11   -1.64    1.79
   1 -10 -11    2.65    2.04
   0 -10 -11   17.20    6.25
   0 -10 -11   16.47    3.64
   0 -10  11   27.63    4.68
  -1 -10 -11    2.07    1.94
  -1 -10 -11    5.85    4.42
   1 -10  11    2.09    2.28
  -2 -10 -11    8.19    2.66
   2 -10  11    9.65    3.11
  -2 -10 -11    3.12    3.97
  -9   0  12   -1.05    3.17
   9   0 -12   -2.17    2.67
   8   0 -12  115.65   12.36
  -8   0  12  104.41   11.24
  -7   0  12    1.14    2.57
   7   0 -12   -0.77    2.35
   6   0 -12   77.02    8.90
  -6   0  12   82.26    9.32
   5   0 -12   -0.83    1.59
  -5   0  12   -0.07    1.65
  -4   0  12    4.48    2.37
   4   0 -12    7.29    2.62
   3   0 -12    0.01    1.25
   3   0 -12    1.17    1.38
   2   0 -12 9236.24  234.50
   2   0 -12 9552.61  232.97
   1   0 -12   -0.47    1.06
   1   0 -12   -0.84    0.70
  -1   0  12   -0.31    1.05
   0   0 -12  352.01   11.13
   0   0  12  329.06   13.54
   0   0  12  337.03   11.05
   0   0 -12  327.48   12.85
  -1   0 -12    0.02    0.58
   1   0  12    0.06    0.71
  -1   0 -12   -0.16    1.00
   1   0  12   -0.65    0.79
  -2   0 -12    9.13    2.22
   2   0  12   18.29    2.74
   2   0  12   10.56    2.58
   3   0  12    0.57    1.37
  -3   0 -12   -0.29    0.97
   4   0  12   59.46    6.25
   4   0  12   51.03    3.11
  -4   0 -12   53.44    5.43
   5   0  12   -0.86    1.69
  -5   0 -12    0.81    1.82
   6   0  12   73.21    8.20
  -6   0 -12   81.74    8.30
  -7   0 -12   -2.90    1.46
   7   0  12    1.00    2.57
   8   0  12  161.02   14.19
  -8   0 -12  134.32   12.06
   9   0  12   -1.84    2.55
  -9   0 -12    0.23    2.99
   9  -1 -12  311.29   19.15
  -9  -1  12  295.75   18.18
   9   1 -12  316.97   18.64
   8  -1 -12   10.76    4.34
  -8  -1  12   32.20    6.76
  -8   1  12   11.06    4.07
   8   1 -12   17.88    5.49
   7  -1 -12  202.27   13.53
  -7  -1  12  224.92   13.92
   7   1 -12  193.70   12.92
  -7   1  12  225.18   13.36
   6  -1 -12   24.65    5.26
  -6  -1  12   22.23    5.30
  -6   1  12   21.46    4.73
   6   1 -12   18.50    4.59
   6   1 -12   24.16    4.96
  -5  -1  12    0.79    1.94
   5  -1 -12    1.03    1.85
   5   1 -12    5.06    2.48
   5   1 -12   -1.62    1.78
  -5   1  12   -1.00    1.56
   4  -1 -12   10.38    3.01
  -4  -1  12   10.96    3.36
  -4   1  12    9.59    3.21
   4   1 -12    9.82    2.89
   4   1 -12    6.97    2.49
   3  -1 -12 2503.09   68.63
   3   1 -12 2579.98   68.50
   3   1 -12 2421.04   67.99
   2  -1 -12  331.95   13.59
   2   1 -12  324.05   13.01
   2   1 -12  312.74   13.14
  -1  -1  12 1320.20   36.97
   1  -1 -12 1306.56   38.15
   1  -1 -12 1348.39   35.20
  -1  -1  12 1311.14   39.26
   1   1 -12 1360.72   38.28
   1   1 -12 1304.72   37.42
  -1   1  12 1338.03   39.04
   0  -1 -12  292.45   11.74
   0  -1  12  300.47   11.20
   0  -1  12  301.41   12.59
   0   1 -12  286.54    8.09
   0   1 -12  286.16   10.88
   0   1  12  300.43   12.57
   0   1 -12  302.29   11.91
   1  -1  12 3694.86   93.50
   1  -1  12 3544.08   94.97
  -1  -1 -12 3655.27   92.70
  -1  -1 -12 3547.90   93.78
  -1   1 -12 3752.37   94.37
   1   1  12 3662.52   95.35
   1   1  12 3717.20   90.35
  -2  -1 -12  383.23   14.00
   2  -1  12  375.89   14.78
   2  -1  12  389.09   12.14
  -2  -1 -12  403.61   13.09
  -2   1 -12  376.10   14.08
   2   1  12  375.03   14.96
   3  -1  12   53.72    5.70
  -3  -1 -12   56.64    5.36
  -3   1 -12   39.57    4.56
   3   1  12   48.25    3.45
   3   1  12   52.24    5.74
   4  -1  12   93.51    6.93
   4  -1  12  105.70    4.05
  -4  -1 -12  103.60    6.75
   4   1  12  101.12    7.33
  -4   1 -12   98.89    6.59
   4   1  12  107.03    5.35
   5  -1  12  239.26   12.38
  -5  -1 -12  249.35   11.76
   5   1  12  251.89   12.75
  -5   1 -12  254.14   11.89
   6  -1  12    0.65    2.07
  -6  -1 -12   -2.39    1.63
  -6   1 -12   -0.75    1.44
   6   1  12    0.22    2.08
  -7  -1 -12    4.38    2.88
   7  -1  12    5.47    3.46
   7   1  12   -0.46    1.98
  -7   1 -12    1.46    2.53
   8  -1  12    9.10    4.00
  -8  -1 -12    3.30    3.12
   8   1  12    1.95    3.16
  -8   1 -12    1.41    2.67
  -8  -2  12  133.68   13.53
   8  -2 -12  127.08   12.88
   8   2 -12  132.33   12.70
  -7  -2  12   14.06    4.73
   7  -2 -12   17.03    4.89
   7   2 -12    8.93    3.40
  -7   2  12   12.82    4.08
   6  -2 -12  409.32   19.18
  -6  -2  12  384.33   18.93
   6   2 -12  419.46   18.55
   6   2 -12  428.47   20.32
  -6   2  12  401.46   17.95
  -5  -2  12   -0.37    2.23
   5  -2 -12    5.24    2.71
  -5   2  12    7.05    2.79
   5   2 -12    7.32    2.90
   5   2 -12    6.41    3.39
   4  -2 -12 1260.27   38.80
  -4   2  12 1234.29   37.76
   4   2 -12 1231.43   37.88
   4   2 -12 1209.23   39.36
   3  -2 -12  108.47    7.44
   3   2 -12  108.95    7.22
   3   2 -12  113.25    7.92
  -3   2  12  103.62    7.17
  -2  -2  12  848.56   28.43
  -2  -2  12  850.40   27.01
   2  -2 -12  895.79   27.67
   2   2 -12  874.19   27.99
   2   2 -12  835.42   26.76
  -1  -2  12 1309.83   38.44
  -1  -2  12 1319.70   39.37
   1  -2 -12 1298.13   38.19
   1   2 -12 1396.78   39.11
   1   2 -12 1344.15   33.59
   1   2 -12 1317.88   37.91
   0  -2  12    4.01    1.91
   0  -2 -12    4.95    1.73
   0  -2  12    4.06    1.75
   0   2 -12    5.09    1.88
   0   2 -12    7.88    2.23
   0   2  12    4.41    1.79
  -1  -2 -12  506.74   16.90
   1  -2  12  502.49   17.76
  -1  -2 -12  488.56   17.15
   1  -2  12  509.65   17.86
   1   2  12  525.63   18.27
  -1   2 -12  492.67   17.13
  -2  -2 -12   -0.08    0.95
   2  -2  12    1.35    1.33
  -2  -2 -12   -0.04    0.95
   2   2  12   -0.69    1.00
  -2   2 -12    0.87    1.01
   2   2  12    0.47    1.02
  -3  -2 -12   98.66    6.19
   3  -2  12  101.60    6.63
  -3   2 -12   99.87    6.25
   3   2  12   91.41    6.77
   3   2  12  100.20    5.67
   4  -2  12  408.03   16.61
  -4  -2 -12  452.66   16.34
  -4   2 -12  406.92   15.84
   4   2  12  421.25   17.28
   4   2  12  434.84   14.88
  -5  -2 -12  197.75   10.35
   5  -2  12  183.35   10.71
   5   2  12  187.64   11.05
  -5   2 -12  204.28   10.29
   6  -2  12    5.25    2.97
  -6  -2 -12    6.29    2.92
  -6   2 -12    5.17    2.60
   6   2  12    3.49    2.78
  -7  -2 -12    4.27    2.95
   7  -2  12    2.72    2.92
   7   2  12   10.52    4.22
  -7   2 -12    3.64    3.05
  -8  -2 -12    5.44    3.26
   8  -2  12   14.28    4.84
   8   2  12   12.75    4.72
  -8  -3  12   89.97   11.46
   8  -3 -12  116.11   13.34
   7  -3 -12    7.34    3.89
  -7  -3  12   12.46    4.63
   6  -3 -12   -1.32    1.84
  -6  -3  12    0.55    2.37
   6   3 -12    0.99    2.20
   5  -3 -12  694.26   26.02
  -5  -3  12  655.05   26.20
   5   3 -12  701.34   24.75
  -5   3  12  664.41   23.94
   5   3 -12  712.31   27.94
   4  -3 -12  146.06    9.57
  -4   3  12  141.34    8.42
   4   3 -12  131.55    8.43
   4   3 -12  146.26   10.29
   3  -3 -12 1198.42   37.03
  -3   3  12 1268.95   36.03
   3   3 -12 1175.30   38.62
   3   3 -12 1178.76   35.75
   2  -3 -12   25.24    4.05
  -2  -3  12   16.76    3.50
  -2  -3  12   13.49    3.23
   2   3 -12   22.35    3.48
   2   3 -12   19.86    3.96
   2   3 -12   19.55    2.51
  -1  -3  12 1330.48   38.94
   1  -3 -12 1288.27   37.55
  -1  -3  12 1312.62   39.31
   1   3 -12 1263.94   36.73
   1   3 -12 1318.94   39.45
   0  -3  12   35.24    4.74
   0  -3  12   29.34    4.42
   0  -3 -12   27.63    3.60
   0   3  12   33.23    4.34
   0   3 -12   31.86    3.89
   1  -3  12    3.76    1.72
  -1  -3 -12    3.13    1.44
  -1  -3 -12    6.90    2.33
   1  -3  12    4.85    2.12
   1   3  12    2.43    1.45
   1   3  12    6.32    2.16
  -1   3 -12    3.67    1.58
  -2  -3 -12    2.51    1.47
   2  -3  12    4.87    1.82
  -2  -3 -12    0.76    1.46
   2   3  12    8.76    2.64
   2   3  12    3.25    0.98
  -2   3 -12    1.96    1.48
   2   3  12    3.20    1.71
  -3  -3 -12  267.44   11.86
   3  -3  12  276.55   12.09
  -3  -3 -12  271.24   11.42
  -3   3 -12  281.98   11.64
   3   3  12  272.56   12.58
   3   3  12  263.30   11.39
   3   3  12  274.40   10.14
  -4  -3 -12   52.10    5.75
   4  -3  12   46.22    5.59
   4   3  12   56.91    6.64
  -4   3 -12   49.46    5.63
   4   3  12   40.21    4.89
   5  -3  12   21.48    4.30
  -5  -3 -12   20.54    4.06
  -5   3 -12   17.99    3.79
   5   3  12   25.56    4.90
   6  -3  12   23.21    4.86
  -6  -3 -12   23.51    4.49
   6   3  12   21.93    4.93
   7  -3  12   44.88    7.29
  -7  -3 -12   50.03    7.41
   8  -3  12    3.18    3.45
  -8  -3 -12   12.83    4.35
   8  -4 -12    5.57    3.90
  -8  -4  12   14.41    5.38
   7  -4 -12  258.77   15.78
  -7  -4  12  251.56   15.84
  -6  -4  12   63.40    8.83
   6  -4 -12   47.88    7.23
   5  -4 -12  622.00   24.36
  -5  -4  12  616.51   25.15
   5   4 -12  599.89   26.70
   5   4 -12  632.67   22.87
   4  -4 -12  699.25   25.07
  -4   4  12  653.39   22.14
   4   4 -12  677.76   27.38
   4   4 -12  677.48   22.99
  -3  -4  12  436.21   18.71
   3  -4 -12  452.72   17.98
  -3   4  12  431.53   15.80
   3   4 -12  479.32   20.47
   3   4 -12  473.25   16.62
  -2  -4  12   19.50    4.18
  -2  -4  12   12.10    3.23
   2  -4 -12   17.28    3.49
  -2   4  12   12.85    2.80
   2   4 -12   14.64    2.59
   2   4 -12   15.09    3.73
   2   4 -12   13.84    2.70
  -1  -4  12   27.64    4.97
   1  -4 -12   27.30    4.33
   1  -4 -12   33.96    4.39
  -1  -4  12   34.20    4.50
  -1  -4  12   30.54    4.54
   1   4 -12   32.15    4.97
  -1   4  12   32.88    4.35
   0  -4  12   89.36    7.64
   0  -4 -12   71.65    6.69
   0  -4 -12   68.15    4.95
   0  -4  12   66.27    7.60
   0  -4  12   75.01    6.58
   0  -4 -12   68.21    3.24
   0   4  12   54.95    5.56
   1  -4  12  152.92    7.69
   1  -4  12  163.12    8.37
  -1  -4 -12  143.15    9.13
  -1  -4 -12  150.74    7.56
   1  -4  12  141.97    9.49
  -1  -4 -12  176.63   15.54
   1   4  12  164.50    8.63
  -2  -4 -12    2.09    1.43
  -2  -4 -12    0.24    1.59
   2  -4  12    0.26    1.17
   2  -4  12    1.59    1.90
  -2   4 -12    0.31    0.70
   2   4  12    0.02    1.30
   2   4  12    0.68    0.83
   2   4  12   -0.37    1.15
  -3  -4 -12  232.71   10.71
  -3  -4 -12  249.78   12.15
   3  -4  12  255.29   11.50
   3   4  12  256.00   10.29
   3   4  12  249.77   11.95
  -3   4 -12  248.69   10.76
   3   4  12  263.62   11.98
  -4  -4 -12  542.95   19.35
   4  -4  12  550.84   19.99
   4  -4  12  534.39   16.34
   4   4  12  535.61   20.56
  -4   4 -12  521.88   18.74
   4   4  12  546.41   19.03
   4   4  12  535.02   19.80
   5  -4  12   20.68    4.37
  -5  -4 -12   25.74    4.45
   5   4  12   18.42    4.45
   5   4  12   24.07    4.28
   6  -4  12    0.58    1.96
  -6  -4 -12   -0.08    1.68
   6   4  12    0.25    1.81
   7  -4  12  126.72   11.70
  -7  -4 -12  127.45   11.40
   7   4  12  120.03   11.34
  -8  -4 -12   26.34    5.74
   8  -4  12   21.29    5.78
   7  -5 -12   17.69    5.40
  -7  -5  12   20.21    5.88
  -6  -5  12   77.96    9.90
   6  -5 -12   93.84   10.58
  -6   5  12   83.36    8.03
  -5  -5  12  372.67   18.22
   5  -5 -12  355.34   17.14
  -5   5  12  353.54   15.36
   4  -5 -12  166.01   10.57
  -4   5  12  166.79    9.67
   4   5 -12  190.34   16.09
   3  -5 -12    2.55    2.12
  -3  -5  12    2.31    2.11
   3   5 -12    0.91    2.01
  -3   5  12    2.10    1.84
   2  -5 -12  349.47   14.44
  -2  -5  12  328.16   16.36
   2  -5 -12  319.88   14.61
  -2  -5  12  348.20   15.42
   2   5 -12  354.61   17.22
   2   5 -12  320.53   11.47
  -2   5  12  352.76   14.70
  -2   5  12  330.70   11.05
   1  -5 -12   29.74    4.11
  -1  -5  12   36.47    4.85
  -1  -5  12   34.97    6.15
   1  -5 -12   28.64    4.55
  -1  -5  12   25.40    4.30
   1  -5 -12   33.56    3.74
   1   5 -12   34.08    5.56
   1   5 -12   39.23    4.05
  -1   5  12   30.76    4.49
   0  -5 -12    1.14    1.06
   0  -5  12    1.99    1.44
   0  -5  12    0.11    0.79
   0  -5 -12   -0.48    1.22
   0  -5  12    1.23    1.42
   0  -5  12   -0.15    1.59
   0  -5 -12    0.43    1.09
   0   5  12    0.66    1.30
  -1  -5 -12   -0.19    0.89
  -1  -5 -12    0.77    1.17
   1  -5  12    0.08    1.05
  -1  -5 -12   -0.34    1.58
   1  -5  12    1.44    1.69
   1  -5  12    1.41    1.51
   1   5  12    0.20    1.28
  -2  -5 -12   47.41    6.78
   2  -5  12   37.97    4.34
  -2  -5 -12   34.12    4.35
   2  -5  12   34.89    4.50
   2  -5  12   35.24    6.11
   2   5  12   44.72    5.98
   2   5  12   47.58    4.94
   2   5  12   45.25    3.99
   3  -5  12 2469.84   65.11
  -3  -5 -12 2395.64   64.21
  -3  -5 -12 2338.29   67.19
   3   5  12 2395.83   63.67
   3   5  12 2312.48   66.54
   4  -5  12  246.67   12.07
   4  -5  12  218.01    9.50
  -4  -5 -12  263.55   11.92
  -4  -5 -12  270.63   13.39
   4   5  12  253.76   11.96
   4   5  12  257.59   12.93
   5  -5  12   39.95    5.72
  -5  -5 -12   42.56    5.60
   5   5  12   36.58    5.32
   6  -5  12   27.00    5.22
  -6  -5 -12   29.45    5.20
   6   5  12   27.74    6.75
  -7  -5 -12   55.97    7.55
   7  -5  12   41.40    6.82
   7  -6 -12   30.16    6.87
  -7  -6  12   55.42    9.01
  -6  -6  12   60.53    8.83
   6  -6 -12   61.26    8.68
  -6   6  12   59.77    7.52
   5  -6 -12   58.48    7.95
  -5  -6  12   50.96    7.83
  -5   6  12   40.26    5.94
   4  -6 -12   67.47    7.84
  -4   6  12   47.64    6.32
   3  -6 -12   12.86    3.67
   3   6 -12   17.84    5.17
  -3   6  12   17.89    4.12
   2  -6 -12   -1.30    1.31
  -2  -6  12    4.00    2.68
   2   6 -12    1.65    2.09
  -2   6  12   -0.11    1.51
  -1  -6  12  226.87   14.04
  -1  -6  12  228.31   11.61
   1  -6 -12  234.01   10.40
   1  -6 -12  227.66   10.62
  -1   6  12  222.41   12.01
   1   6 -12  218.16   13.43
   0  -6 -12   76.14    6.38
   0  -6  12   54.68    7.79
   0  -6  12   66.83    6.87
   0  -6  12   58.40    4.20
   0  -6 -12   64.35    4.67
   0   6  12   57.80    7.01
   1  -6  12   -0.75    1.76
  -1  -6 -12    0.93    2.33
  -1  -6 -12    1.30    1.20
   1  -6  12    0.51    1.29
   1  -6  12   -1.44    0.95
  -1  -6 -12   -0.98    0.86
   1   6  12    0.18    1.63
  -2  -6 -12   17.57    3.19
   2  -6  12   16.31    3.25
   2  -6  12   13.42    4.54
  -2  -6 -12   18.35    4.69
   2   6  12   11.43    3.61
  -3  -6 -12  179.85   11.57
   3  -6  12  166.88    9.21
  -3  -6 -12  166.12    8.90
   3  -6  12  170.38    9.32
   3   6  12  166.14   10.79
   3   6  12  172.81    9.09
   4  -6  12  135.84    8.81
  -4  -6 -12  149.75   10.47
  -4  -6 -12  147.68    8.86
   4   6  12  152.75    9.34
  -5  -6 -12   10.61    3.30
   5  -6  12   16.80    4.14
  -6  -6 -12   12.43    3.96
   6  -6  12   14.53    4.14
   7  -6  12    2.88    3.18
  -7  -6 -12    2.87    3.04
   6  -7 -12    4.26    3.37
  -6  -7  12   -0.70    2.63
  -5  -7  12   89.16   10.66
   5  -7 -12   58.63    8.08
  -5   7  12   60.42    7.73
   4  -7 -12    1.09    2.46
  -4   7  12    1.75    2.24
   3  -7 -12   -0.36    1.72
  -3   7  12   -2.05    1.49
   2  -7 -12  521.42   20.34
   2  -7 -12  554.19   20.25
  -2   7  12  547.88   22.26
  -1  -7  12  262.00   10.67
   1  -7 -12  256.50   12.05
  -1  -7  12  255.75   12.72
   1  -7 -12  255.58   11.67
  -1   7  12  256.24   13.92
   0  -7  12   -0.04    1.27
   0  -7 -12    2.07    1.60
   0  -7 -12    2.08    1.47
   0  -7  12    3.06    1.86
   0   7  12    4.40    2.29
  -1  -7 -12  155.92   11.83
  -1  -7 -12  168.84    8.64
  -1  -7 -12  180.18    8.66
   1  -7  12  167.32    8.96
   1  -7  12  189.63    9.70
   1   7  12  171.80   11.38
  -2  -7 -12  395.80   15.03
  -2  -7 -12  390.15   19.36
   2  -7  12  396.10   15.73
   2   7  12  415.83   19.03
  -3  -7 -12  762.23   29.16
  -3  -7 -12  754.08   24.62
   3  -7  12  737.29   25.49
   3  -7  12  739.72   25.01
   3   7  12  717.63   28.14
  -4  -7 -12  558.77   20.84
  -4  -7 -12  552.22   23.70
   4  -7  12  589.70   21.41
  -5  -7 -12   -0.50    2.07
   5  -7  12    4.15    2.73
  -6  -7 -12    5.49    3.10
   6  -7  12    6.70    3.41
  -5  -8  12    7.23    3.79
   5  -8 -12    3.23    2.80
  -5   8  12    2.05    3.00
   4  -8 -12    1.43    2.76
  -4  -8  12   12.22    4.20
  -4   8  12    5.70    2.76
   3  -8 -12   87.20    8.63
  -3   8  12   86.18    9.96
   2  -8 -12  180.63   10.23
  -2   8  12  180.06   12.21
  -1  -8  12  158.08    9.76
   1  -8 -12  158.76    9.00
  -1  -8  12  150.96    8.29
  -1   8  12  152.77   11.31
   0  -8 -12   14.83    3.18
   0  -8  12   16.08    3.44
   0  -8  12   13.50    3.51
   0   8  12   11.63    3.81
   1  -8  12   38.66    5.40
   1  -8  12   41.89    5.41
  -1  -8 -12   37.58    4.75
  -1  -8 -12   33.28    7.08
   1   8  12   48.59    7.98
   2  -8  12   91.31    8.18
  -2  -8 -12   95.34   11.26
  -2  -8 -12   84.16    6.14
   2   8  12   86.44   10.43
   3  -8  12  128.89    8.38
  -3  -8 -12  123.76    7.98
  -3  -8 -12  129.95   12.90
   4  -8  12    0.84    1.95
  -4  -8 -12    2.70    2.18
  -4  -8 -12    1.32    2.94
   5  -8  12   50.41    6.95
  -5  -8 -12   58.85    7.23
   4  -9 -12   27.48    5.34
  -4  -9  12   22.33    5.36
   3  -9 -12    1.47    2.32
   2  -9 -12  608.46   22.49
   1  -9 -12  177.65   10.04
  -1  -9  12  194.84   11.29
   0  -9 -12   83.42    7.48
   0  -9  12  101.69    9.04
   0  -9 -12  102.10   13.03
   1  -9  12   45.78    5.98
  -1  -9 -12   60.60    9.64
  -1  -9 -12   40.06    5.02
   2  -9  12  109.57    7.99
  -2  -9 -12  118.30   13.44
  -2  -9 -12  133.01    8.00
  -3  -9 -12   46.45    5.82
  -3  -9 -12   35.44    7.44
   3  -9  12   36.50    5.52
   4  -9  12  161.72   10.42
  -4  -9 -12  211.65   14.63
  -4  -9 -12  180.88   10.68
   2 -10 -12   16.78    4.07
   1 -10 -12   40.03    5.59
   0 -10  12   13.21    3.91
   0 -10 -12   15.43    6.14
   0 -10 -12   17.07    3.71
  -1 -10 -12   14.08    5.93
   1 -10  12   14.20    3.68
  -1 -10 -12   11.64    3.13
  -2 -10 -12   43.21    5.78
   2 -10  12   44.33    6.10
  -2 -10 -12   41.43    8.43
  -8   0  13    1.21    2.54
   8   0 -13   -1.39    2.29
   7   0 -13   90.38   10.71
  -7   0  13  102.06   11.01
   6   0 -13   -1.49    1.80
  -6   0  13    1.88    2.50
   5   0 -13  790.43   28.89
  -5   0  13  838.29   29.53
   4   0 -13    2.07    1.92
  -4   0  13    0.31    1.45
   3   0 -13   31.84    4.72
   3   0 -13   33.19    4.49
   2   0 -13   -0.54    0.77
   2   0 -13   -1.38    0.86
  -1   0  13   57.16    6.09
   1   0 -13   67.00    4.33
   1   0 -13   67.51    6.44
   0   0 -13   -0.92    1.03
   0   0  13   -0.49    0.75
   0   0  13   -0.04    1.42
   0   0 -13   -1.44    0.68
  -1   0 -13    9.16    2.33
   1   0  13    8.05    2.35
  -1   0 -13    6.68    1.31
   1   0  13    6.75    1.58
  -2   0 -13   -0.21    0.89
   2   0  13    3.15    1.80
   2   0  13   -1.12    0.79
   3   0  13  176.61    9.77
  -3   0 -13  182.63    9.01
   4   0  13   -0.59    1.33
   4   0  13    0.24    0.76
  -4   0 -13    0.77    1.42
   5   0  13   67.07    7.56
  -5   0 -13   74.14    7.00
   6   0  13   -1.73    1.53
  -6   0 -13    1.76    2.12
   7   0  13    0.98    2.59
  -7   0 -13    1.48    2.35
   8   0  13    0.80    2.97
  -8   0 -13   -0.68    2.26
   8  -1 -13   43.77    8.20
  -8  -1  13   26.76    6.26
  -8   1  13   36.27    7.12
   8   1 -13   37.13    7.06
  -7  -1  13    9.96    4.04
   7  -1 -13   24.77    5.77
   7   1 -13   25.65    5.67
  -7   1  13   19.68    5.02
  -6  -1  13  153.05   11.05
   6  -1 -13  121.24   11.50
  -6   1  13  142.66   12.36
   6   1 -13  140.10   12.42
   6   1 -13  136.00   11.84
   5  -1 -13    3.16    2.27
  -5  -1  13    0.37    1.91
   5   1 -13    7.58    3.02
   5   1 -13    1.41    1.70
  -5   1  13    3.02    2.49
   4  -1 -13  260.95   13.39
   4   1 -13  286.67   13.71
  -4   1  13  271.77   13.60
   4   1 -13  308.77   14.05
   3  -1 -13   23.73    4.15
   3   1 -13   30.34    4.68
   3   1 -13   29.34    4.63
   2  -1 -13   15.34    3.32
   2  -1 -13    6.89    1.81
   2   1 -13    5.71    2.10
   2   1 -13    8.36    2.47
   1  -1 -13  130.66    7.70
   1  -1 -13  129.10    5.74
  -1  -1  13  138.45    8.47
  -1  -1  13  142.26    7.04
   1   1 -13  137.75    7.80
   1   1 -13  135.34    7.22
  -1   1  13  131.09    8.10
   0  -1 -13  776.81   24.23
   0  -1  13  768.70   23.17
   0  -1  13  733.45   24.90
   0   1  13  782.26   25.30
   0   1 -13  738.78   19.50
   0   1 -13  757.90   22.92
   0   1 -13  759.69   24.15
   1  -1  13  381.78   13.83
  -1  -1 -13  387.73   13.18
  -1  -1 -13  399.69   14.48
   1  -1  13  388.56   15.26
   1   1  13  392.15   15.46
   1   1  13  371.51   11.16
  -1   1 -13  383.03   14.52
  -2  -1 -13 4803.28  117.74
   2  -1  13 4491.50  120.49
   2  -1  13 4595.75  116.61
  -2  -1 -13 4671.46  119.48
  -2   1 -13 4754.05  119.75
   2   1  13 4772.67  121.24
  -3  -1 -13  387.53   14.60
   3  -1  13  368.89   15.27
   3   1  13  377.44   12.75
   3   1  13  365.70   15.57
  -3   1 -13  402.98   14.89
   4  -1  13   16.06    3.56
   4  -1  13   16.85    1.83
  -4  -1 -13   20.82    3.65
   4   1  13   15.97    3.52
   4   1  13   14.52    2.43
  -4   1 -13   13.14    2.96
  -5  -1 -13  245.19   11.94
   5  -1  13  232.81   12.38
  -5   1 -13  234.82   11.63
   5   1  13  239.79   12.70
  -6  -1 -13   78.07    8.11
   6  -1  13   67.55    7.92
   6   1  13   64.27    8.08
  -6   1 -13   61.24    7.06
   7  -1  13   50.52    7.57
  -7  -1 -13   45.20    6.45
  -7   1 -13   55.05    7.09
   7   1  13   55.57    8.05
   8  -1  13  146.52   13.37
  -8  -1 -13  155.98   11.21
  -8   1 -13  122.02   13.80
   8   1  13  178.60   15.03
  -8  -2  13   25.56    6.34
   8  -2 -13   23.51    6.20
   8   2 -13   28.30    6.37
  -7  -2  13   21.40    5.76
   7  -2 -13   26.82    6.03
  -7   2  13   30.44    5.79
   7   2 -13   21.30    5.16
  -6  -2  13   -0.65    2.00
   6  -2 -13    3.88    2.93
   6   2 -13    6.76    3.57
   6   2 -13    1.18    2.20
  -6   2  13    2.09    2.38
   5  -2 -13   -0.77    1.45
  -5  -2  13   -1.42    1.61
  -5   2  13   -1.30    1.54
   5   2 -13    0.07    2.44
   5   2 -13    3.25    2.21
   4  -2 -13  147.95    9.69
  -4   2  13  152.01    9.33
   4   2 -13  142.70    9.08
   4   2 -13  143.99    9.97
   3  -2 -13  438.93   17.78
   3   2 -13  476.50   17.59
  -3   2  13  465.83   17.72
   3   2 -13  399.85   17.67
  -2  -2  13   74.90    7.48
  -2  -2  13   64.61    6.05
   2  -2 -13   62.49    6.29
   2   2 -13   76.66    6.75
   2   2 -13   72.06    6.87
  -1  -2  13  186.13    9.55
   1  -2 -13  210.90   10.06
   1  -2 -13  200.62    6.97
  -1  -2  13  221.09   10.97
   1   2 -13  207.38   10.22
   1   2 -13  204.53    9.70
   0  -2  13   75.55    7.14
   0  -2 -13   66.36    6.07
   0  -2  13   95.41    6.26
   0   2 -13   87.76    5.94
   0   2  13   86.94    6.26
   0   2 -13   92.65    5.99
  -1  -2 -13  125.52    6.89
   1  -2  13  111.63    7.07
  -1  -2 -13  122.27    6.91
   1  -2  13  116.80    7.35
  -1   2 -13  124.76    7.06
   1   2  13  126.74    7.72
   2  -2  13  650.78   18.02
  -2  -2 -13  659.91   21.19
  -2  -2 -13  650.69   20.93
   2  -2  13  649.37   22.18
   2   2  13  667.82   22.76
   2   2  13  669.44   20.40
  -2   2 -13  618.49   21.24
  -3  -2 -13  304.57   12.74
   3  -2  13  332.22   13.86
   3   2  13  327.55   12.08
   3   2  13  300.85   13.89
  -3   2 -13  325.00   13.10
   4  -2  13   20.91    3.89
  -4  -2 -13   28.21    4.39
   4   2  13   24.80    4.46
  -4   2 -13   25.63    4.23
   4   2  13   28.36    3.67
  -5  -2 -13   41.95    5.56
   5  -2  13   44.09    6.00
  -5   2 -13   37.69    5.35
   5   2  13   25.99    5.06
  -6  -2 -13  146.77    9.64
   6  -2  13  132.77    9.74
  -6   2 -13  144.79    9.37
   6   2  13  138.53   10.16
   7  -2  13   -3.62    1.51
  -7  -2 -13   -0.50    2.22
   7   2  13    0.37    2.52
  -8  -2 -13   14.70    4.56
   8  -2  13    9.05    3.97
   8   2  13    7.46    4.31
  -8  -3  13   59.64    9.16
   8  -3 -13   45.26    8.11
   7  -3 -13   10.05    4.05
  -7  -3  13   12.21    4.87
   6  -3 -13   76.63    9.18
  -6  -3  13   83.00   10.22
   6   3 -13   88.87    9.36
  -5  -3  13   10.89    3.73
   5  -3 -13    9.68    3.71
  -5   3  13   16.42    3.91
   5   3 -13   10.50    3.38
   5   3 -13   14.33    4.49
   4  -3 -13  824.56   29.02
   4   3 -13  828.11   30.73
   4   3 -13  838.08   27.80
  -4   3  13  838.44   27.55
   3  -3 -13   52.94    6.48
   3   3 -13   56.38    6.08
  -3   3  13   52.09    5.96
   3   3 -13   54.88    6.96
  -2  -3  13  110.09    7.46
  -2  -3  13   94.50    8.80
   2  -3 -13  103.10    7.06
   2   3 -13   93.24    4.68
   2   3 -13   95.50    6.34
   2   3 -13   98.80    9.04
  -1  -3  13  222.61   11.16
  -1  -3  13  229.31   11.28
   1  -3 -13  197.69    9.93
   1   3 -13  207.31    9.62
   1   3 -13  215.10   11.17
   0  -3 -13   44.30    4.91
   0  -3  13   42.52    5.34
   0  -3  13   50.43    6.13
   0   3  13   54.28    5.58
   0   3 -13   50.17    5.08
  -1  -3 -13  154.86    8.78
   1  -3  13  159.31    9.30
  -1  -3 -13  146.68    7.71
   1  -3  13  149.49    8.42
   1   3  13  155.89    7.90
  -1   3 -13  153.28    7.86
   1   3  13  147.42    8.43
   2  -3  13 1234.96   37.63
  -2  -3 -13 1147.60   34.75
   2  -3  13 1208.83   36.08
  -2  -3 -13 1140.63   35.80
  -2   3 -13 1230.48   35.44
   2   3  13 1232.71   31.37
   2   3  13 1266.91   35.37
   2   3  13 1215.70   36.75
  -3  -3 -13 1422.41   40.70
  -3  -3 -13 1411.54   40.13
   3  -3  13 1381.62   40.96
   3   3  13 1428.96   37.79
   3   3  13 1381.00   39.88
  -3   3 -13 1376.93   40.10
   3   3  13 1356.45   41.81
   4  -3  13   39.20    5.41
  -4  -3 -13   30.45    4.43
   4   3  13   32.85    5.16
   4   3  13   35.67    4.62
  -4   3 -13   30.90    4.48
  -5  -3 -13  300.04   13.94
   5  -3  13  314.85   14.77
  -5   3 -13  301.58   13.64
   5   3  13  320.07   15.45
   6  -3  13   49.06    6.85
  -6  -3 -13   54.95    6.80
   6   3  13   51.61    7.44
  -7  -3 -13   20.60    4.83
   7  -3  13   27.37    5.80
  -8  -3 -13    1.97    3.12
   8  -3  13    2.41    3.06
  -8  -4  13   31.36    7.17
   8  -4 -13   27.33    7.02
  -7  -4  13   41.83    7.89
   7  -4 -13   61.41    9.07
  -6  -4  13   74.22    9.73
   6  -4 -13   80.16    9.67
  -5  -4  13  131.75   12.15
   5  -4 -13  159.55   10.83
   5   4 -13  152.47   14.34
   4  -4 -13    2.23    2.10
  -4   4  13    3.19    1.95
   4   4 -13    4.44    2.68
   4   4 -13   10.71    3.06
   3  -4 -13 2889.61   80.14
  -3  -4  13 2875.63   81.28
   3   4 -13 3037.95   83.74
   3   4 -13 2940.63   78.05
  -3   4  13 2968.44   77.58
  -2  -4  13    1.36    1.72
   2  -4 -13    3.61    1.88
  -2  -4  13    0.04    1.50
   2   4 -13    0.38    1.45
  -2   4  13    1.17    1.30
   2   4 -13    0.63    1.13
   2   4 -13    1.80    1.19
  -1  -4  13  438.31   17.19
  -1  -4  13  424.30   18.15
   1  -4 -13  412.47   15.87
   1   4 -13  372.27   14.15
   1   4 -13  427.67   18.04
  -1   4  13  433.71   15.97
   0  -4  13   58.51    7.09
   0  -4  13   73.63    7.38
   0  -4  13   73.34    7.05
   0  -4 -13   78.22    5.46
   0   4  13   68.50    6.35
  -1  -4 -13  300.21   12.11
   1  -4  13  309.97   13.06
   1  -4  13  312.25   14.95
  -1  -4 -13  287.08   13.89
   1   4  13  297.06   12.52
   1   4  13  308.34   12.98
  -2  -4 -13   99.30    6.25
   2  -4  13  113.95    7.18
  -2  -4 -13  107.99    7.76
   2  -4  13  120.01   10.57
   2   4  13  103.89    7.05
   2   4  13  108.62    7.18
   2   4  13  102.07    4.53
  -3  -4 -13  374.24   14.62
  -3  -4 -13  378.97   15.82
   3  -4  13  379.29   15.26
   3   4  13  370.48   15.71
   3   4  13  349.08   15.03
  -3   4 -13  370.75   14.45
   3   4  13  389.60   13.33
   4  -4  13   45.50    4.05
   4  -4  13   60.15    6.62
  -4  -4 -13   52.06    5.72
   4   4  13   54.69    6.67
   4   4  13   44.31    5.63
   4   4  13   65.37    6.08
  -4   4 -13   52.94    7.87
   5  -4  13  119.44    8.54
  -5  -4 -13  111.88    7.95
   5   4  13  100.50    7.37
   5   4  13  115.38   15.28
  -6  -4 -13   25.09    4.70
   6  -4  13   10.74    3.60
   6   4  13   16.39    3.96
   7  -4  13   54.62    7.95
  -7  -4 -13   38.03    6.36
  -8  -4 -13   -4.47    2.18
   8  -4  13   -3.73    2.19
  -7  -5  13   -1.22    2.44
   7  -5 -13    1.45    2.62
  -6  -5  13  288.08   16.54
   6  -5 -13  248.43   15.11
  -6   5  13  248.15   12.80
  -5  -5  13   75.34    9.52
   5  -5 -13   77.82    9.16
  -5   5  13   58.62    6.67
   4  -5 -13  704.08   26.24
  -4   5  13  723.31   24.75
   4   5 -13  674.28   29.10
  -3  -5  13  756.29   28.93
   3  -5 -13  815.40   27.54
   3   5 -13  747.76   30.10
  -3   5  13  811.02   26.71
   2  -5 -13   13.94    3.51
  -2  -5  13   16.67    3.93
  -2  -5  13   16.68    4.43
   2   5 -13   14.40    4.27
  -2   5  13   15.12    3.22
   2   5 -13   12.18    2.58
   1  -5 -13   17.19    2.55
  -1  -5  13   18.80    4.30
   1  -5 -13   17.46    3.47
   1  -5 -13   14.75    3.51
  -1  -5  13   17.36    3.71
  -1  -5  13   13.70    3.24
   1   5 -13   13.59    3.83
   1   5 -13   15.63    2.27
  -1   5  13   21.41    2.68
  -1   5  13   11.28    2.80
   0  -5 -13    9.93    1.75
   0  -5 -13    7.22    2.25
   0  -5 -13    9.25    2.82
   0  -5  13    8.63    1.46
   0  -5  13    4.65    2.67
   0  -5  13    6.13    2.26
   0  -5  13    9.28    2.87
   0   5  13    6.08    2.24
   1  -5  13   57.04    5.73
  -1  -5 -13   41.09    4.76
   1  -5  13   51.38    3.41
  -1  -5 -13   50.72    5.79
   1  -5  13   53.07    5.85
  -1  -5 -13   48.04    6.73
   1  -5  13   62.50    8.22
   1   5  13   52.08    6.23
   2  -5  13  248.40   14.10
   2  -5  13  257.40   11.70
  -2  -5 -13  249.83   10.90
  -2  -5 -13  244.22   13.16
   2   5  13  240.88   11.24
   2   5  13  227.97   12.02
  -3  -5 -13 1336.25   38.65
   3  -5  13 1333.75   39.41
  -3  -5 -13 1294.30   41.12
   3  -5  13 1301.09   43.65
   3   5  13 1325.09   37.27
   3   5  13 1308.86   40.59
  -4  -5 -13   42.63    6.08
  -4  -5 -13   41.06    5.39
   4  -5  13   50.61    4.83
   4  -5  13   58.47    6.63
   4   5  13   38.68    5.75
   4   5  13   44.15    5.33
   5  -5  13   19.15    4.33
  -5  -5 -13   17.65    3.90
   5   5  13   25.78    4.69
  -6  -5 -13   90.85    9.31
   6  -5  13   72.27    8.59
  -7  -5 -13   -2.50    2.22
   7  -5  13    1.80    2.87
   7  -6 -13    2.17    3.05
  -7  -6  13    3.63    3.55
  -6  -6  13   63.49    9.33
   6  -6 -13   70.43    9.40
  -6   6  13   38.55    6.12
   5  -6 -13    4.12    3.17
  -5  -6  13    6.68    3.44
  -5   6  13    5.93    2.85
   4  -6 -13  101.01   10.00
  -4   6  13  120.30    8.72
   3  -6 -13 1731.40   51.73
  -3   6  13 1783.95   52.12
   3   6 -13 1757.87   57.01
  -2  -6  13  154.58   10.13
   2  -6 -13  152.20    9.37
  -2   6  13  151.28    9.78
   2   6 -13  172.73   12.26
   1  -6 -13   -0.09    1.21
  -1  -6  13    0.95    2.33
  -1  -6  13   -0.47    1.51
   1  -6 -13    0.00    1.42
   1   6 -13    0.97    2.12
  -1   6  13    4.08    2.32
   0  -6  13  114.64    7.99
   0  -6 -13  124.10    6.50
   0  -6  13  136.59   12.88
   0  -6 -13  135.10    7.67
   0  -6  13  126.69    6.01
   0   6  13  135.79    9.16
   1  -6  13   58.30    4.33
   1  -6  13   42.18    7.21
  -1  -6 -13   57.83    5.68
   1  -6  13   62.39    6.65
  -1  -6 -13   64.20    8.51
   1   6  13   62.96    7.48
  -2  -6 -13  108.87   10.58
  -2  -6 -13  112.99    6.96
   2  -6  13   98.59    7.07
   2   6  13  112.25   10.34
   3  -6  13    6.97    2.68
  -3  -6 -13    4.39    2.23
  -3  -6 -13    7.01    3.51
   3  -6  13    1.25    1.79
   3   6  13    0.17    1.42
   3   6  13    5.60    2.92
  -4  -6 -13  525.46   19.63
   4  -6  13  511.90   20.12
  -4  -6 -13  530.15   21.92
  -5  -6 -13   47.00    6.23
   5  -6  13   38.98    6.07
  -6  -6 -13   -0.09    2.14
   6  -6  13    5.43    3.14
  -7  -6 -13    0.17    2.67
   7  -6  13    0.00    2.41
  -6  -7  13  193.92   13.99
   6  -7 -13  203.68   13.89
  -6   7  13  196.41   17.70
   5  -7 -13   95.49   10.26
  -5  -7  13  106.62   11.62
  -5   7  13   87.12    9.52
   4  -7 -13   17.47    4.59
  -4   7  13    9.57    3.59
   3  -7 -13   33.35    5.63
  -3   7  13   36.20    6.02
   2  -7 -13  188.36   10.61
   2  -7 -13  192.20   10.56
  -2   7  13  176.93   11.56
  -1  -7  13   24.39    4.64
   1  -7 -13   32.92    4.97
   1  -7 -13   21.10    3.85
  -1   7  13   19.58    4.36
   0  -7 -13    0.62    1.42
   0  -7  13    0.70    1.28
   0  -7  13    2.19    1.97
   0  -7 -13    1.54    1.49
   0   7  13    2.27    2.16
  -1  -7 -13  117.79   12.28
   1  -7  13   97.69    8.49
   1  -7  13   85.95    5.98
  -1  -7 -13   93.68    6.52
  -1  -7 -13   96.78    6.61
   1   7  13   81.19    9.42
   2  -7  13   39.26    5.33
  -2  -7 -13   49.55    5.43
  -2  -7 -13   46.61    7.45
   2   7  13   47.67    7.32
   3  -7  13  339.31   16.06
  -3  -7 -13  347.97   18.05
  -3  -7 -13  366.22   14.89
   3  -7  13  329.02   14.91
   3   7  13  394.65   18.47
  -4  -7 -13    6.89    3.65
   4  -7  13    2.41    2.50
  -4  -7 -13    0.04    1.92
   5  -7  13   38.03    5.88
  -5  -7 -13   52.86    7.05
  -6  -7 -13  108.77   10.45
   6  -7  13   99.12   10.36
   5  -8 -13   -0.21    2.26
  -5  -8  13    0.65    3.09
   4  -8 -13   64.72    8.21
  -4  -8  13   50.59    7.84
  -4   8  13   45.35   11.62
   3  -8 -13  107.67    9.87
  -3   8  13  111.31   11.01
   2  -8 -13   56.63    6.69
  -2   8  13   44.93    7.18
  -1  -8  13   49.13    5.21
   1  -8 -13   49.27    6.11
  -1  -8  13   46.91    6.34
  -1   8  13   47.51    7.30
   0  -8  13    2.28    1.72
   0  -8 -13    2.25    1.99
   0  -8  13    2.13    1.93
   0   8  13    2.90    2.90
  -1  -8 -13    9.79    2.72
  -1  -8 -13    6.04    3.96
   1  -8  13   14.44    5.41
   1  -8  13   15.17    3.62
   1   8  13   12.49    4.09
   2  -8  13   10.46    3.13
  -2  -8 -13   20.98    5.87
  -2  -8 -13   11.60    2.89
   2   8  13   12.56    4.67
   3  -8  13   26.00    4.76
  -3  -8 -13   35.18    5.10
  -3  -8 -13   24.09    5.98
   4  -8  13   15.89    4.13
  -4  -8 -13   16.86    3.93
  -4  -8 -13   19.02    5.37
  -5  -8 -13   70.41    8.04
   5  -8  13   82.93    8.91
   4  -9 -13   -0.22    2.23
  -4  -9  13   -3.55    1.97
   3  -9 -13   46.56    6.77
   2  -9 -13   -0.81    1.80
   1  -9 -13    4.61    2.71
  -1  -9  13    7.25    3.28
   0  -9 -13   64.77    6.80
   0  -9 -13   56.72    9.49
   0  -9  13   64.25    7.52
   1  -9  13  150.75    9.84
  -1  -9 -13  150.59    8.97
  -1  -9 -13  164.41   16.47
  -2  -9 -13    9.52    4.75
  -2  -9 -13   10.43    3.09
   2  -9  13   10.82    3.31
   3  -9  13    5.21    2.85
  -3  -9 -13    5.34    3.96
  -3  -9 -13    1.93    2.06
  -4  -9 -13    6.26    3.03
  -4  -9 -13   10.45    5.05
   4  -9  13   13.02    3.97
   2 -10 -13  259.83   13.48
   1 -10 -13    6.03    2.89
   0 -10 -13   49.45    9.46
   0 -10 -13   49.81    6.24
   0 -10  13   44.84    6.59
  -1 -10 -13  118.71   14.71
   1 -10  13  121.86   10.49
  -1 -10 -13  114.25    8.13
  -2 -10 -13   58.71    6.94
   2 -10  13   59.43    7.49
  -2 -10 -13   55.34   10.00
  -8   0  14  262.23   16.22
   8   0 -14  271.78   16.86
   7   0 -14    1.53    2.51
  -7   0  14   -0.61    2.29
  -6   0  14  179.03   11.88
   6   0 -14  128.61   11.91
   5   0 -14   -0.56    1.89
  -5   0  14   -1.10    1.94
  -4   0  14  101.75    9.67
   4   0 -14  106.54    9.72
   4   0 -14  105.27    7.50
   3   0 -14   -0.13    1.10
   3   0 -14   -0.50    1.68
   2   0 -14  573.26   20.46
   2   0 -14  543.91   18.64
  -1   0  14   -0.12    1.21
   1   0 -14    0.14    0.93
   1   0 -14   -0.75    0.87
   0   0  14  670.63   23.35
   0   0  14  673.24   19.73
   0   0 -14  663.41   22.30
   1   0  14    0.14    1.26
  -1   0 -14    0.04    1.05
  -1   0 -14    0.79    0.73
   1   0  14    0.11    0.78
   2   0  14 1552.19   42.96
   2   0  14 1610.16   46.22
  -2   0 -14 1593.02   44.74
  -3   0 -14    1.45    1.45
   3   0  14   -0.65    1.17
   4   0  14  207.21   11.16
   4   0  14  187.64    7.33
  -4   0 -14  185.37    9.76
   5   0  14   -0.44    0.82
  -5   0 -14    0.98    1.79
   5   0  14   -0.55    1.86
  -6   0 -14   34.98    5.48
   6   0  14   23.01    5.17
  -7   0 -14    0.26    2.29
   7   0  14    0.76    2.54
   8   0  14  254.00   15.82
  -8   0 -14  254.25   14.89
   8  -1 -14   -1.74    2.50
  -8  -1  14    9.95    4.87
   8   1 -14    1.79    2.89
  -8   1  14    1.52    3.52
  -7  -1  14  189.94   13.12
   7  -1 -14  157.05   14.02
   7   1 -14  145.06   12.99
  -7   1  14  173.51   12.06
  -6  -1  14   86.93   10.22
   6  -1 -14   81.12    9.86
  -6   1  14  110.58   10.79
   6   1 -14   96.67   10.58
   6   1 -14   90.29    9.98
  -5  -1  14  533.44   22.51
   5  -1 -14  523.39   21.93
   5   1 -14  521.34   22.00
  -5   1  14  543.81   21.96
   5   1 -14  547.58   21.94
   4  -1 -14  145.33    9.61
   4   1 -14  149.25    9.62
   4   1 -14  127.45    8.85
  -4   1  14  154.59    9.88
   3  -1 -14 1015.54   32.70
   3   1 -14  991.92   32.28
   3   1 -14 1021.02   32.22
   2  -1 -14   73.80    4.79
   2  -1 -14   77.44    7.46
   2   1 -14   78.28    6.90
   2   1 -14   79.87    7.49
  -1  -1  14 2153.23   60.80
  -1  -1  14 2118.37   57.51
   1  -1 -14 2137.77   59.40
   1  -1 -14 2165.38   55.73
   1   1 -14 2143.80   59.28
   1   1 -14 2167.97   58.24
  -1   1  14 2199.43   60.55
   0  -1  14  499.83   16.80
   0  -1  14  504.27   18.89
   0  -1 -14  491.62   17.82
   0   1  14  466.85   18.47
   0   1 -14  492.91   13.24
   0   1 -14  488.17   16.52
   0   1 -14  511.25   17.99
   1  -1  14   21.65    4.03
  -1  -1 -14   22.76    3.54
   1  -1  14   21.85    3.31
  -1  -1 -14   24.54    3.09
   1   1  14   21.81    2.05
   1   1  14   20.81    3.91
  -1   1 -14   24.61    3.92
  -2  -1 -14   57.17    5.72
   2  -1  14   67.89    4.03
   2  -1  14   59.88    6.39
  -2  -1 -14   76.03    4.59
  -2   1 -14   72.98    6.52
   2   1  14   61.46    6.58
  -3  -1 -14  230.67   10.75
   3  -1  14  213.31   11.35
   3   1  14  245.06    9.28
   3   1  14  232.61   11.92
  -3   1 -14  246.32   11.14
   4  -1  14   16.34    3.69
  -4  -1 -14   13.81    3.23
   4   1  14   13.99    3.70
  -4   1 -14   11.28    2.94
   4   1  14   12.16    2.26
   5  -1  14  347.89   16.29
  -5  -1 -14  349.02   15.40
   5   1  14  371.48   12.62
   5   1  14  364.37   16.77
  -5   1 -14  379.07   15.68
  -6  -1 -14   27.18    4.97
   6  -1  14   27.55    5.36
   6   1  14   23.49    5.04
  -6   1 -14   33.23    5.57
   7  -1  14   36.19    6.51
  -7  -1 -14   39.59    6.69
  -7   1 -14   31.97    5.91
   7   1  14   34.66    6.40
  -8  -1 -14    0.94    2.80
   8  -1  14    3.06    3.49
   8   1  14    1.08    3.50
   8  -2 -14   42.41    7.76
  -8  -2  14   41.09    8.00
   7  -2 -14    1.89    2.73
  -7  -2  14    2.68    2.78
   7   2 -14    3.49    2.99
   6  -2 -14   73.73    9.14
  -6  -2  14   70.45    8.92
   6   2 -14   75.07    9.02
  -6   2  14   71.05    8.57
   5  -2 -14  236.56   13.70
  -5  -2  14  265.18   14.87
   5   2 -14  262.18   14.83
   5   2 -14  270.01   13.82
  -5   2  14  253.54   13.40
   4  -2 -14  178.69   10.78
   4   2 -14  143.07    9.46
   4   2 -14  167.96   10.77
  -4   2  14  161.38    9.95
   3  -2 -14  112.76    8.04
   3   2 -14  112.72    8.26
   3   2 -14  101.52    7.34
   2  -2 -14  222.56   11.54
  -2  -2  14  273.18   11.87
  -2  -2  14  261.62   13.15
   2   2 -14  259.34   12.35
   2   2 -14  252.70   11.74
  -1  -2  14 1466.34   44.07
  -1  -2  14 1495.71   42.66
   1  -2 -14 1428.59   42.67
   1  -2 -14 1475.79   38.28
   1   2 -14 1476.54   42.47
   1   2 -14 1513.19   43.08
   0  -2 -14  149.31    8.15
   0  -2  14  141.54    8.64
   0  -2  14  134.61    7.90
   0   2 -14  147.26    8.12
   0   2  14  145.53    8.62
   1  -2  14   27.03    4.05
   1  -2  14   22.44    4.00
  -1  -2 -14   21.22    3.55
  -1  -2 -14   19.55    3.27
   1   2  14   26.74    4.41
  -1   2 -14   26.08    4.04
   2  -2  14    1.24    1.51
  -2  -2 -14    6.70    2.24
  -2  -2 -14    2.97    1.60
   2  -2  14    2.23    0.93
   2   2  14    3.10    1.91
  -2   2 -14    4.79    1.96
   2   2  14    3.37    1.53
  -3  -2 -14    0.33    1.36
   3  -2  14   -0.53    1.45
   3   2  14    5.07    2.19
   3   2  14   -0.62    1.10
  -3   2 -14    3.54    1.94
  -4  -2 -14  884.35   28.07
   4  -2  14  866.02   29.03
   4   2  14  878.09   26.26
   4   2  14  824.09   29.34
  -4   2 -14  866.58   28.04
  -5  -2 -14 1551.28   45.00
   5  -2  14 1494.12   45.97
   5   2  14 1503.55   46.70
   5   2  14 1489.56   41.92
  -5   2 -14 1487.85   44.55
  -6  -2 -14  709.47   25.64
   6  -2  14  696.51   26.69
  -6   2 -14  702.41   25.26
   6   2  14  696.66   26.99
  -7  -2 -14    3.84    2.83
   7  -2  14   -0.70    2.15
   7   2  14    2.50    3.00
  -8  -2 -14   -4.51    2.09
   8  -2  14    1.55    3.31
   8  -3 -14   -5.08    2.58
  -8  -3  14   -1.08    2.70
  -7  -3  14   -2.71    2.09
   7  -3 -14   -0.79    2.36
  -6  -3  14  129.13   12.77
   6   3 -14  140.03   10.07
  -5  -3  14   86.60    9.76
   5  -3 -14   94.48    9.84
  -5   3  14   96.72    9.13
   5   3 -14   83.52    9.95
   5   3 -14   98.99    9.36
   4  -3 -14   88.96    9.21
  -4   3  14   92.51    8.53
   4   3 -14   87.46    9.75
   4   3 -14   75.04    7.74
   3  -3 -14    1.35    1.84
   3   3 -14    3.65    2.31
   3   3 -14    0.69    1.49
  -3   3  14    4.56    2.16
  -2  -3  14   29.35    4.67
   2  -3 -14   26.22    4.37
  -2  -3  14   14.85    3.60
   2   3 -14   31.43    3.04
   2   3 -14   29.31    4.22
   2   3 -14   25.40    4.43
  -1  -3  14  177.79   10.13
   1  -3 -14  201.39    9.99
  -1  -3  14  186.35   10.47
   1   3 -14  184.87   10.44
   1   3 -14  184.80    9.20
   0  -3 -14    9.88    2.67
   0  -3  14   16.92    3.62
   0  -3  14   16.06    3.49
   0   3  14   16.62    3.43
   0   3 -14   18.79    3.22
  -1  -3 -14   32.91    4.26
   1  -3  14   34.00    5.13
  -1  -3 -14   35.48    4.90
   1  -3  14   33.19    4.66
  -1   3 -14   33.03    4.32
   1   3  14   37.06    4.58
   1   3  14   28.48    4.44
  -2  -3 -14  372.33   15.19
   2  -3  14  393.25   15.73
  -2  -3 -14  360.01   14.41
   2  -3  14  383.55   16.35
  -2   3 -14  379.02   14.81
   2   3  14  385.45   16.12
   2   3  14  408.52   14.85
  -3  -3 -14  177.01    9.19
  -3  -3 -14  183.26    9.43
   3  -3  14  170.73    9.66
   3   3  14  165.44    8.85
  -3   3 -14  156.04    8.87
   3   3  14  174.23   10.26
   3   3  14  178.37    7.31
   4  -3  14  108.50    7.80
  -4  -3 -14   92.15    8.01
   4   3  14  100.40    6.73
  -4   3 -14   94.22    6.91
   4   3  14   95.90    9.29
  -5  -3 -14  407.99   16.90
   5  -3  14  396.50   17.43
   5   3  14  405.46   18.30
  -5   3 -14  379.14   16.26
   5   3  14  404.93   15.61
  -6  -3 -14  139.36    9.55
   6  -3  14  113.50   10.63
   6   3  14  146.69   12.66
   7  -3  14   14.27    4.60
  -7  -3 -14   12.87    4.23
  -8  -3 -14   51.00    7.93
   8  -3  14   64.43    9.02
  -8  -4  14   61.40    9.93
   8  -4 -14   45.25    8.43
   7  -4 -14    5.68    3.67
  -7  -4  14    5.03    3.68
  -6  -4  14  264.90   16.13
   6  -4 -14  263.22   15.64
  -5  -4  14  220.24   13.97
   5  -4 -14  240.27   13.73
   5   4 -14  198.66   19.57
   4  -4 -14  159.74   10.56
   4   4 -14  154.73    9.31
   4   4 -14  167.57   14.45
  -3  -4  14  167.56   10.60
   3  -4 -14  175.16   10.35
   3   4 -14  149.06    8.63
   3   4 -14  157.01   11.26
  -3   4  14  149.34    8.42
  -2  -4  14  209.23   12.30
   2  -4 -14  225.83   11.64
  -2  -4  14  232.44   12.67
   2   4 -14  256.24   10.91
   2   4 -14  227.53    9.09
  -2   4  14  254.25   10.87
   2   4 -14  225.69   13.07
  -1  -4  14  329.43   15.90
   1  -4 -14  351.70   14.41
  -1  -4  14  336.16   15.17
   1   4 -14  347.09   16.03
   1   4 -14  336.11   13.01
  -1   4  14  340.83   13.98
   0  -4  14  176.97   10.92
   0  -4 -14  184.85    9.33
   0  -4  14  200.10   10.56
   0   4  14  193.44    9.76
   0   4 -14  181.51    8.60
  -1  -4 -14   44.52    5.99
   1  -4  14   33.31    4.66
   1  -4  14   38.22    5.80
  -1  -4 -14   40.26    4.75
   1   4  14   40.01    5.05
   1   4  14   40.70    5.19
  -1   4 -14   45.34    4.93
   2  -4  14   27.53    4.36
   2  -4  14   24.71    4.66
  -2  -4 -14   23.69    4.38
  -2  -4 -14   25.29    3.87
   2   4  14   27.25    4.27
   2   4  14   26.15    4.35
  -2   4 -14   27.52    3.94
  -3  -4 -14  784.92   26.49
   3  -4  14  795.30   26.23
  -3  -4 -14  755.50   25.04
  -3   4 -14  751.26   24.86
   3   4  14  762.50   22.69
   3   4  14  758.52   26.56
   3   4  14  779.33   25.90
  -4  -4 -14    4.53    2.16
   4  -4  14    3.68    2.35
   4   4  14    1.88    2.22
   4   4  14   -0.03    1.84
   4   4  14    4.50    2.07
   5  -4  14    9.92    3.43
  -5  -4 -14    7.26    2.88
   5   4  14    9.08    2.76
  -6  -4 -14  357.03   16.85
   6  -4  14  381.66   17.93
   6   4  14  367.35   19.79
  -7  -4 -14  375.53   18.34
   7  -4  14  414.82   19.79
  -8  -4 -14   28.17    6.18
   8  -4  14   18.46    5.48
   7  -5 -14   55.27    8.95
  -7  -5  14   63.10    9.38
  -6  -5  14    2.73    3.35
   6  -5 -14    0.17    2.82
  -6   5  14    1.44    2.08
   5  -5 -14   14.27    4.25
  -5  -5  14    8.45    3.69
  -5   5  14    8.35    3.01
   4  -5 -14  168.21   10.98
   4   5 -14  141.94   13.77
  -4   5  14  148.28    9.32
  -3  -5  14  111.39   11.90
   3  -5 -14  131.30    9.17
  -3   5  14  121.85    8.29
   3   5 -14  144.23   13.44
  -2  -5  14   78.97    8.76
   2  -5 -14   71.22    7.47
  -2  -5  14   71.72    8.92
  -2   5  14  101.85    8.83
   2   5 -14   62.71    8.21
   1  -5 -14  378.35   12.66
  -1  -5  14  361.78   17.89
   1  -5 -14  377.41   15.37
  -1  -5  14  383.12   16.51
   1  -5 -14  362.06   22.61
   1   5 -14  371.57   17.75
   1   5 -14  345.29   12.96
  -1   5  14  380.68   15.95
  -1   5  14  382.58   14.78
   0  -5 -14    2.40    2.07
   0  -5 -14    4.17    2.00
   0  -5  14    4.73    2.19
   0  -5  14    3.67    2.16
   0  -5 -14    3.95    1.07
   0  -5  14    2.37    2.20
   0   5  14    3.98    2.07
   0   5 -14    4.75    1.58
   1  -5  14   15.22    2.01
   1  -5  14   15.28    3.40
  -1  -5 -14   12.35    3.66
  -1  -5 -14   13.05    2.83
   1  -5  14   17.21    4.35
   1  -5  14   11.15    3.05
   1   5  14   10.46    2.99
   2  -5  14   19.81    4.70
   2  -5  14   16.92    3.72
  -2  -5 -14   17.25    4.15
  -2  -5 -14   14.71    3.08
   2   5  14   12.51    3.37
   3  -5  14  249.47   12.41
  -3  -5 -14  277.32   13.96
   3  -5  14  248.90   14.80
  -3  -5 -14  262.26   11.98
   3   5  14  257.79   13.25
   3   5  14  264.68   10.46
  -4  -5 -14  851.44   28.80
   4  -5  14  814.47   27.72
  -4  -5 -14  750.53   26.43
   4   5  14  793.89   25.72
   4   5  14  784.56   28.01
  -5  -5 -14   -3.21    1.32
   5  -5  14   -0.68    2.05
  -6  -5 -14   11.76    3.94
   6  -5  14   13.33    4.22
   7  -5  14   46.42    7.60
  -7  -5 -14   39.71    6.77
  -7  -6  14  208.00   17.83
   7  -6 -14  209.31   14.86
   6  -6 -14  145.98   13.77
  -6  -6  14  130.85   13.45
  -6   6  14  117.87   10.71
   5  -6 -14   32.90    6.30
  -5  -6  14   39.08    7.23
  -5   6  14   25.76    4.94
   4  -6 -14   30.52    5.66
  -4   6  14   24.78    4.79
   3  -6 -14   22.00    4.77
   3   6 -14   20.52    6.38
  -3   6  14   33.70    5.63
  -2  -6  14  198.02   12.00
   2  -6 -14  204.80   11.32
  -2   6  14  205.04   11.72
   2   6 -14  223.99   14.34
  -1  -6  14   10.83    3.57
   1  -6 -14   10.27    2.99
   1  -6 -14    8.15    2.25
   1   6 -14    6.62    3.31
  -1   6  14   10.14    3.32
   0  -6  14   40.90    3.05
   0  -6 -14   55.58    3.81
   0  -6  14   46.40    6.13
   0  -6 -14   46.62    5.40
   0  -6  14   53.47    8.22
   0   6  14   40.96    5.88
  -1  -6 -14  264.75   11.57
   1  -6  14  253.31   12.36
   1  -6  14  244.44    9.51
  -1  -6 -14  218.17   13.72
   1  -6  14  291.64   28.94
   1   6  14  260.37   13.61
  -2  -6 -14    4.03    2.06
  -2  -6 -14    3.00    2.57
   2  -6  14    6.48    2.38
   2   6  14    4.28    2.83
   3  -6  14   31.41    4.75
  -3  -6 -14   24.95    4.15
  -3  -6 -14   27.03    5.75
   3  -6  14   24.80    4.47
   3   6  14   34.15    5.83
   4  -6  14  547.53   21.54
  -4  -6 -14  563.79   21.02
  -4  -6 -14  581.20   23.37
   4   6  14  549.24   22.80
   5  -6  14  137.42    9.98
  -5  -6 -14  151.69    9.79
   6  -6  14    4.94    3.11
  -6  -6 -14    3.11    2.64
   7  -6  14   31.51    6.51
  -7  -6 -14   42.14    7.02
  -6  -7  14   58.72    9.47
   6  -7 -14   66.13    9.47
  -6   7  14   38.06    6.77
   5  -7 -14   16.47    5.02
  -5  -7  14   19.50    5.60
  -5   7  14   10.79    3.55
   4  -7 -14  176.88   11.93
  -4   7  14  210.68   12.64
   3  -7 -14   44.01    6.45
  -3   7  14   60.03    7.86
   2  -7 -14  637.14   23.12
  -2   7  14  583.38   24.16
   1  -7 -14    0.44    1.76
  -1  -7  14    0.93    1.98
  -1   7  14    2.79    2.72
   0  -7 -14   39.65    5.22
   0  -7  14   35.13    5.42
   0  -7  14   39.66    4.08
   0   7  14   41.49    6.85
   1  -7  14   47.79    6.28
  -1  -7 -14   51.13    5.79
   1  -7  14   58.59    5.54
  -1  -7 -14   51.37    7.90
   1   7  14   47.18    6.98
   2  -7  14    0.24    1.85
  -2  -7 -14    1.94    3.00
  -2  -7 -14    0.70    1.60
   2   7  14    2.02    2.54
   3  -7  14  150.57    9.61
  -3  -7 -14  171.96   12.15
  -3  -7 -14  143.44    8.92
   3   7  14  159.07   13.87
  -4  -7 -14  226.24   12.02
  -4  -7 -14  226.61   14.13
   4  -7  14  228.57   12.57
   5  -7  14  104.00   10.15
  -5  -7 -14  102.36    9.60
   6  -7  14  113.21   11.36
  -6  -7 -14  104.31   10.47
   5  -8 -14   31.33    6.44
  -5  -8  14   16.76    5.67
   4  -8 -14   27.98    5.87
   3  -8 -14  348.32   16.57
   2  -8 -14   57.32    7.07
  -2   8  14   61.62    9.72
  -1  -8  14   27.28    5.12
   1  -8 -14   19.09    3.99
  -1   8  14   18.44    4.98
   0  -8  14    8.20    3.05
   0  -8 -14   14.53    5.14
   0  -8 -14   10.39    3.18
   0   8  14   16.14    4.66
  -1  -8 -14   80.34   10.96
  -1  -8 -14   77.17    7.30
   1  -8  14   73.36    7.84
   1   8  14   87.12   12.32
   2  -8  14   21.47    4.41
  -2  -8 -14   20.45    6.10
  -2  -8 -14   16.28    3.73
  -3  -8 -14   -2.49    2.42
   3  -8  14   -0.37    1.71
  -3  -8 -14   -1.85    1.41
  -4  -8 -14   31.42    5.39
  -4  -8 -14   39.69    7.68
   4  -8  14   33.23    5.49
  -5  -8 -14  117.29   10.53
   5  -8  14  115.30   11.06
  -4  -9  14   40.10    7.39
   4  -9 -14   31.90    6.00
   3  -9 -14    1.90    2.50
   2  -9 -14   97.38    9.56
  -1  -9  14   54.67    7.54
   1  -9 -14   60.22    7.00
   0  -9 -14   28.06    4.73
   0  -9  14   26.64    5.07
   0  -9 -14   32.26    7.29
  -1  -9 -14   45.86    8.73
   1  -9  14   29.09    5.38
  -1  -9 -14   31.91    4.96
  -2  -9 -14   19.43    6.38
   2  -9  14   19.36    4.56
  -2  -9 -14   13.83    3.53
  -3  -9 -14   24.73    4.62
   3  -9  14   18.59    4.64
  -3  -9 -14   28.53    7.09
   4  -9  14    3.90    2.66
  -4  -9 -14   -0.64    2.14
  -4  -9 -14    7.52    4.60
   1 -10 -14   -1.39    2.09
   0 -10 -14   -1.63    1.88
   0 -10  14    2.06    2.74
   0 -10 -14    3.07    4.16
   1 -10  14   29.19    5.68
  -1 -10 -14   16.16    6.54
  -1 -10 -14   24.14    4.65
   8   0 -15   -1.04    2.67
  -8   0  15    1.15    3.20
   7   0 -15   86.17   10.55
  -7   0  15   68.00    9.12
   6   0 -15   -0.31    2.01
  -6   0  15   -2.30    1.75
   5   0 -15  367.88   17.05
   5   0 -15  370.56   17.82
  -5   0  15  391.16   18.33
   4   0 -15    0.66    1.54
   4   0 -15    2.93    2.20
   3   0 -15    0.45    1.48
   3   0 -15    8.81    2.55
   2   0 -15    0.69    1.15
   2   0 -15   -0.80    1.15
   1   0 -15    0.68    1.01
   1   0 -15    0.95    1.34
  -1   0  15    2.53    1.89
   0   0 -15    1.26    1.34
   0   0  15    1.38    0.98
   0   0  15    2.41    1.73
  -1   0 -15   25.37    4.22
  -1   0 -15   21.34    2.40
   1   0  15   20.67    3.98
   1   0  15   19.06    2.65
  -2   0 -15   -1.54    1.07
   2   0  15   -0.76    1.18
  -3   0 -15  159.76    8.68
   3   0  15  132.22    8.84
  -4   0 -15    0.85    1.70
   4   0  15    0.18    1.65
   4   0  15   -0.88    0.81
   5   0  15 1540.21   46.54
   5   0  15 1464.61   39.11
  -5   0 -15 1467.09   44.42
  -6   0 -15    0.60    2.09
   6   0  15    0.56    2.28
  -7   0 -15   93.34    9.37
   7   0  15   78.60    9.52
  -8   0 -15   -1.10    2.80
   8   0  15    2.27    3.34
  -8  -1  15  175.06   15.61
   8  -1 -15  175.62   15.90
   8   1 -15  163.78   15.50
  -7  -1  15    0.03    2.56
   7  -1 -15    4.69    3.43
   7   1 -15    4.98    3.32
  -7   1  15    5.33    3.20
  -6  -1  15   -2.03    1.94
   6  -1 -15    0.36    2.19
   6   1 -15    0.25    2.31
   6   1 -15    2.51    2.58
  -6   1  15   -1.17    1.88
   5  -1 -15   26.35    5.42
  -5  -1  15   35.12    6.28
   5   1 -15   25.65    5.06
  -5   1  15   28.84    5.38
   5   1 -15   25.12    5.10
   4  -1 -15   17.96    4.12
   4   1 -15   18.51    4.21
   4   1 -15   21.15    4.30
  -4   1  15   16.68    4.09
   3  -1 -15   42.13    4.86
   3  -1 -15   38.25    5.68
   3   1 -15   41.86    5.78
   3   1 -15   40.48    5.69
   2  -1 -15  513.44   17.11
  -2  -1  15  541.27   21.00
   2  -1 -15  543.97   20.07
   2   1 -15  486.49   19.17
   2   1 -15  510.54   18.81
   1  -1 -15   89.51    4.73
  -1  -1  15   78.21    8.11
  -1  -1  15   82.41    5.47
   1  -1 -15   92.54    8.16
   1   1 -15   92.22    8.08
   1   1 -15   89.19    5.95
  -1   1  15   66.67    7.09
   0  -1  15  117.47    7.96
   0  -1  15  100.50    6.13
   0  -1 -15  105.49    7.06
   0   1  15  102.55    7.51
   0   1 -15  107.55    3.82
   0   1 -15   99.10    6.85
  -1  -1 -15    3.57    1.75
  -1  -1 -15    4.55    1.52
   1  -1  15    7.24    2.48
   1  -1  15    4.00    1.71
   1   1  15    4.80    1.06
  -1   1 -15    6.15    2.00
   1   1  15    7.88    2.75
   2  -1  15  258.55   12.56
  -2  -1 -15  268.96   10.15
   2  -1  15  257.55    9.47
  -2  -1 -15  261.15   11.66
   2   1  15  272.36   13.01
  -2   1 -15  252.96   11.71
   3  -1  15  278.01   13.65
  -3  -1 -15  329.86   13.45
   3   1  15  309.03   11.18
   3   1  15  290.57   14.07
  -3   1 -15  290.33   12.96
  -4  -1 -15    2.36    1.93
   4  -1  15    0.04    1.71
   4   1  15    2.21    1.31
   4   1  15    1.97    1.92
  -4   1 -15    1.17    1.51
   5  -1  15   75.81    3.41
   5  -1  15   75.33    8.24
  -5  -1 -15   84.83    8.02
   5   1  15   79.52    4.99
  -5   1 -15   84.74    7.97
   5   1  15   62.66    7.60
  -6  -1 -15  329.09   15.39
   6  -1  15  302.41   15.88
  -6   1 -15  311.49   14.91
   6   1  15  294.30   15.94
   7  -1  15   23.30    5.60
  -7  -1 -15   23.35    5.10
  -7   1 -15   20.37    4.99
   7   1  15   17.61    4.94
  -8  -1 -15  135.02   12.30
   8  -1  15  121.62   12.67
   8   1  15  143.06   14.13
   8  -2 -15    1.82    3.48
  -8  -2  15    1.31    2.68
  -7  -2  15   53.29    8.79
   7  -2 -15   53.72    8.34
   7   2 -15   61.29    8.62
   6  -2 -15   24.06    5.69
  -6  -2  15   21.73    5.80
   6   2 -15   25.69    5.62
  -6   2  15   27.41    5.56
  -5  -2  15  212.57   13.35
   5  -2 -15  197.72   12.47
   5   2 -15  225.56   12.57
   5   2 -15  176.15   12.39
  -5   2  15  194.32   11.83
   4  -2 -15  179.43   11.31
   4   2 -15  176.52   11.53
  -4   2  15  202.92   11.40
   4   2 -15  188.71   11.09
   3  -2 -15   82.00    8.47
   3   2 -15   67.06    7.42
   3   2 -15   86.02    7.88
  -2  -2  15   42.25    5.18
   2  -2 -15   55.91    6.54
  -2  -2  15   41.91    6.36
   2   2 -15   56.38    6.37
   2   2 -15   53.34    6.07
  -1  -2  15   41.09    5.01
  -1  -2  15   32.38    4.97
   1  -2 -15   42.62    5.32
   1  -2 -15   36.42    2.58
  -1   2  15   34.82    5.05
   1   2 -15   37.09    4.89
   1   2 -15   42.61    5.32
   0  -2 -15   18.13    3.52
   0  -2  15   14.69    3.03
   0  -2  15   21.61    4.27
   0   2 -15   15.90    3.27
   0   2  15    9.97    2.87
   1  -2  15  263.52   11.87
   1  -2  15  246.66   12.16
  -1  -2 -15  237.85   10.83
  -1  -2 -15  259.14   11.55
   1   2  15  248.75   12.28
  -1   2 -15  249.06   11.50
  -2  -2 -15  162.18    8.21
   2  -2  15  173.88    9.69
   2  -2  15  162.56    9.04
   2  -2  15  158.03    6.01
  -2  -2 -15  141.45    8.20
  -2   2 -15  171.19    9.10
   2   2  15  147.88    7.63
   2   2  15  164.93    9.73
  -3  -2 -15  274.27   12.08
   3  -2  15  252.08   12.64
   3  -2  15  252.32    9.46
   3   2  15  286.98   13.64
  -3   2 -15  280.42   12.46
   3   2  15  234.93   10.46
  -4  -2 -15    1.87    1.79
   4  -2  15    0.28    1.72
   4   2  15    2.02    2.34
   4   2  15    0.59    1.24
  -4   2 -15   -0.79    1.27
   5  -2  15 1889.86   56.34
  -5  -2 -15 1926.49   55.07
  -5   2 -15 1838.53   54.67
   5   2  15 1848.30   51.80
   5   2  15 2041.26   57.80
   6  -2  15  120.57   11.26
  -6  -2 -15  132.25    9.42
   6   2  15  139.13   12.60
  -6   2 -15  141.38    9.63
   7  -2  15   30.07    6.25
  -7  -2 -15   22.32    5.12
   7   2  15   37.87    7.13
   8  -2  15   42.92    7.78
  -8  -2 -15   30.92    6.61
   8  -3 -15  214.53   15.71
  -8  -3  15  231.19   16.15
  -7  -3  15    5.42    3.75
   7  -3 -15   -1.09    2.63
   6  -3 -15   26.53    6.07
  -6  -3  15   32.04    6.95
   6   3 -15   27.35    5.44
  -5  -3  15  415.26   20.16
   5  -3 -15  446.14   19.89
   5   3 -15  382.26   20.02
   5   3 -15  410.09   18.18
  -5   3  15  415.65   17.99
   4  -3 -15  537.34   21.90
  -4   3  15  537.44   20.51
   4   3 -15  502.80   22.65
   4   3 -15  522.83   20.51
   3  -3 -15   31.19    5.10
   3   3 -15   38.65    5.41
   3   3 -15   33.71    5.62
  -3   3  15   50.26    6.08
   2  -3 -15  347.83   15.38
  -2  -3  15  354.24   16.53
  -2  -3  15  353.74   15.57
   2   3 -15  365.75   14.81
   2   3 -15  377.14   16.63
   2   3 -15  347.75   11.35
  -1  -3  15   34.52    5.46
   1  -3 -15   30.68    4.70
  -1  -3  15   37.69    5.46
   1   3 -15   29.20    4.27
   1   3 -15   31.52    4.84
   0  -3  15  474.73   18.76
   0  -3  15  468.81   18.62
   0  -3 -15  476.50   17.68
   0   3  15  481.58   18.23
   0   3 -15  437.01   16.91
   1  -3  15  297.48   13.81
  -1  -3 -15  307.34   13.00
   1  -3  15  316.13   14.48
  -1  -3 -15  299.14   13.52
   1   3  15  322.93   12.77
   1   3  15  308.13   13.98
  -1   3 -15  307.67   13.00
  -2  -3 -15    7.51    2.50
   2  -3  15    7.17    1.20
   2  -3  15   10.39    2.88
  -2  -3 -15    5.86    2.25
   2  -3  15    8.16    2.82
   2   3  15    6.55    2.26
   2   3  15    6.04    2.64
  -2   3 -15    5.27    2.34
  -3  -3 -15  428.87   16.88
  -3  -3 -15  444.82   17.04
   3  -3  15  456.32   18.24
   3   3  15  448.43   14.10
   3   3  15  468.01   18.95
  -3   3 -15  462.91   17.46
   3   3  15  442.30   16.63
   4  -3  15  171.74   10.37
  -4  -3 -15  170.36    9.68
   4   3  15  171.15    9.17
  -4   3 -15  171.60    9.81
   4   3  15  161.38   10.56
  -5  -3 -15   27.46    4.86
   5  -3  15   24.69    5.13
   5   3  15   20.37    4.83
   5   3  15   14.80    3.50
  -5   3 -15   24.40    4.84
   6  -3  15    8.48    3.26
  -6  -3 -15    7.78    3.24
   6   3  15   11.77    4.11
  -7  -3 -15  110.91   10.62
   7  -3  15   94.95   10.55
   8  -3  15   -0.12    2.90
  -8  -3 -15    0.07    2.83
   7  -4 -15   25.08    6.39
  -7  -4  15   35.82    7.49
  -6  -4  15   81.63   10.67
   6  -4 -15   75.26    9.50
  -5  -4  15   -0.63    2.17
   5  -4 -15    0.02    2.25
   4  -4 -15  256.86   14.21
   4   4 -15  277.84   16.14
   4   4 -15  265.73   12.91
   3  -4 -15  581.02   22.37
  -3  -4  15  550.26   22.46
   3   4 -15  575.43   20.50
   3   4 -15  603.13   24.61
  -3   4  15  541.90   20.02
  -2  -4  15   42.66    6.55
  -2  -4  15   52.53    7.02
   2  -4 -15   44.87    6.19
   2   4 -15   48.30    3.60
   2   4 -15   52.91    5.86
  -2   4  15   56.85    6.03
   2   4 -15   48.34    6.92
  -1  -4  15   18.05    4.12
   1  -4 -15   18.47    3.76
  -1  -4  15   13.93    3.63
  -1   4  15   15.50    3.19
   1   4 -15   15.08    3.85
   1   4 -15   21.31    3.61
   0  -4 -15   94.75    6.70
   0  -4  15   92.98    8.82
   0  -4  15  101.20    9.53
   0   4  15  100.88    6.86
   0   4 -15   88.37    5.95
  -1  -4 -15   39.40    5.55
  -1  -4 -15   44.37    5.24
   1  -4  15   45.09    6.40
   1  -4  15   39.79    5.64
  -1   4 -15   43.73    5.03
   1   4  15   46.48    5.71
   1   4  15   44.81    5.49
  -2  -4 -15   95.89    6.66
  -2  -4 -15  107.72    7.91
   2  -4  15  102.76    7.49
   2  -4  15   86.87    9.07
   2   4  15  109.91    7.38
  -2   4 -15   99.05    6.59
   2   4  15   91.86    8.45
  -3  -4 -15   15.18    3.46
   3  -4  15   15.83    3.77
  -3  -4 -15   16.27    3.41
   3   4  15   24.15    4.24
   3   4  15   27.68    3.07
   3   4  15   19.34    4.27
  -3   4 -15   20.40    3.73
   4  -4  15  302.51   14.43
  -4  -4 -15  313.37   13.90
   4   4  15  279.94   14.68
   4   4  15  289.94   12.02
   4   4  15  308.79   13.87
  -5  -4 -15  653.27   23.62
   5  -4  15  645.72   24.49
   5   4  15  597.20   21.75
   5   4  15  618.54   22.69
   6  -4  15  185.37   12.05
  -6  -4 -15  178.08   11.30
  -7  -4 -15    9.26    3.78
   7  -4  15    6.69    3.55
   7  -5 -15   39.65    7.67
  -7  -5  15   51.52    9.22
  -6  -5  15  199.20   14.15
   6  -5 -15  180.56   13.19
  -6   5  15  182.96   11.04
   5  -5 -15   34.45    6.65
  -5  -5  15   35.32    6.82
  -5   5  15   22.00    4.36
   4  -5 -15  378.14   18.12
  -4   5  15  394.59   16.73
   3  -5 -15   68.30    7.83
   3   5 -15   84.08   10.32
  -3   5  15   77.42    7.94
  -2  -5  15   10.97    3.67
  -2  -5  15   12.15    3.98
   2  -5 -15   10.41    3.27
  -2   5  15    9.13    2.90
   2   5 -15    7.22    3.36
  -1  -5  15   81.81    9.61
   1  -5 -15   91.30    4.86
   1  -5 -15   85.97    7.89
  -1  -5  15   76.76    8.18
  -1   5  15   84.44    8.09
   1   5 -15   95.42   10.18
   0  -5  15  412.77   17.37
   0  -5  15  396.99   19.00
   0  -5 -15  406.83   16.12
   0   5  15  398.18   16.86
  -1  -5 -15    2.68    2.36
   1  -5  15    1.74    0.75
  -1  -5 -15    0.96    1.52
   1  -5  15    0.80    2.05
   1  -5  15    0.92    2.02
   1   5  15    1.83    1.87
   2  -5  15    7.62    3.52
  -2  -5 -15    5.82    3.07
   2  -5  15    7.06    2.66
  -2  -5 -15    5.19    2.08
   2   5  15    1.80    2.04
  -3  -5 -15  123.15    9.24
   3  -5  15  140.14    9.15
   3  -5  15  127.29   13.69
  -3  -5 -15  136.00    8.34
   3   5  15  142.49    9.50
   3   5  15  132.55    6.48
   4  -5  15 1255.67   39.27
  -4  -5 -15 1294.50   39.93
  -4  -5 -15 1240.80   38.12
   4   5  15 1142.26   38.71
  -5  -5 -15   46.83    6.42
   5  -5  15   41.33    6.45
   6  -5  15    3.03    2.59
  -6  -5 -15   -0.20    2.12
   7  -5  15   10.32    4.16
  -7  -5 -15   19.44    5.11
  -6  -6  15    1.95    3.31
   6  -6 -15    3.19    3.04
  -6   6  15    5.07    2.93
   5  -6 -15    7.59    3.61
  -5  -6  15   10.23    4.22
  -5   6  15    9.04    3.26
   4  -6 -15   67.10    8.41
  -4   6  15   47.99    6.69
   3  -6 -15  330.04   15.95
  -3   6  15  323.22   15.63
   2  -6 -15   20.30    4.24
  -2  -6  15   24.61    5.18
  -2   6  15   19.72    4.46
   2   6 -15   22.13    5.33
   1  -6 -15   22.33    3.16
  -1  -6  15   16.60    3.98
   1  -6 -15   20.18    4.01
  -1   6  15   15.58    3.77
   1   6 -15    9.26    3.51
   0  -6 -15    0.39    1.54
   0  -6  15    2.45    2.31
   0  -6 -15    4.12    1.32
   0   6  15   -0.37    1.70
   1  -6  15    0.33    1.03
  -1  -6 -15    2.98    2.67
  -1  -6 -15    1.32    1.71
   1  -6  15    0.15    1.64
   1   6  15    2.32    2.34
  -2  -6 -15   35.36    6.58
   2  -6  15   37.52    5.47
  -2  -6 -15   39.91    5.25
   2   6  15   45.56    6.86
  -3  -6 -15   63.07    8.55
   3  -6  15   62.42    7.25
  -3  -6 -15   73.60    7.40
   3   6  15   78.91    8.79
  -4  -6 -15   32.69    5.25
  -4  -6 -15   37.81    6.22
   4  -6  15   26.56    5.01
   4   6  15   23.71    5.41
   5  -6  15   78.43    8.89
  -5  -6 -15   61.69    7.37
  -6  -6 -15   87.29    9.44
   6  -6  15   95.48   10.45
  -6  -7  15   37.20    7.79
   6  -7 -15   45.42    8.21
  -5  -7  15    6.16    3.92
   5  -7 -15    8.92    4.15
  -5   7  15    5.38    3.53
   4  -7 -15  160.40   11.36
  -4   7  15  160.45   11.31
   3  -7 -15  176.33   11.38
  -3   7  15  179.91   11.86
   2  -7 -15  131.51    9.48
  -2   7  15  153.25   10.78
  -1  -7  15  135.07    9.86
   1  -7 -15  154.57    9.56
  -1   7  15  143.42   10.52
   0  -7 -15  497.97   19.32
   0  -7  15  510.43   20.73
   0   7  15  525.53   22.33
  -1  -7 -15    5.57    2.44
  -1  -7 -15    5.69    3.69
   1  -7  15    3.11    2.36
   1   7  15   11.90    4.02
  -2  -7 -15   16.70    5.08
   2  -7  15   13.55    3.66
  -2  -7 -15   15.80    3.48
   2   7  15   15.37    4.32
   3  -7  15   94.12    9.06
  -3  -7 -15  114.45   12.19
  -3  -7 -15  107.59    7.75
   3   7  15   89.43    9.95
  -4  -7 -15  766.04   30.29
  -4  -7 -15  799.32   27.67
   4  -7  15  799.09   28.57
   5  -7  15   69.73    8.54
  -5  -7 -15   91.30    9.17
  -6  -7 -15   12.55    4.20
   6  -7  15   21.58    5.66
  -5  -8  15   37.15    7.33
   5  -8 -15   34.95    6.80
   4  -8 -15   27.14    5.93
   3  -8 -15   33.05    6.02
   2  -8 -15   32.49    5.53
   1  -8 -15    4.01    2.73
  -1  -8  15    1.88    2.27
   0  -8 -15  101.83    9.03
   0  -8 -15   81.51   10.92
   0  -8  15   98.21    9.58
  -1  -8 -15   50.28    8.63
  -1  -8 -15   42.14    5.77
   1  -8  15   38.99    6.11
  -2  -8 -15   95.61   11.56
   2  -8  15  106.15    9.91
  -2  -8 -15  111.19    8.01
   3  -8  15  115.66   10.41
  -3  -8 -15  129.00    8.91
  -3  -8 -15  137.40   14.02
  -4  -8 -15   44.20    6.36
   4  -8  15   39.81    6.43
  -4  -8 -15   55.80    9.03
   5  -8  15   -1.40    2.28
  -5  -8 -15    2.84    2.97
   3  -9 -15  275.62   14.94
   2  -9 -15   25.56    5.38
   1  -9 -15  238.65   12.80
  -1  -9  15  216.57   13.32
   0  -9  15   26.22    5.46
   0  -9 -15   30.62    5.19
   0  -9 -15   26.01    7.27
   1  -9  15   74.38    8.46
  -1  -9 -15   98.47   13.14
  -1  -9 -15   69.95    7.63
  -2  -9 -15    3.68    2.63
  -2  -9 -15    2.74    3.10
   2  -9  15    3.01    2.80
  -3  -9 -15   17.78    6.28
  -3  -9 -15   10.36    3.50
   3  -9  15   17.46    4.49
   8   0 -16  328.83   19.08
  -8   0  16  328.82   18.94
   7   0 -16    1.83    2.76
  -7   0  16    0.67    2.66
  -6   0  16  244.94   14.70
   6   0 -16  227.74   14.00
   6   0 -16  247.85   14.79
  -5   0  16    3.19    2.76
   5   0 -16   -3.43    1.30
   5   0 -16    1.11    2.07
   4   0 -16   37.83    5.32
   4   0 -16   35.90    5.94
   3   0 -16    0.98    1.87
   3   0 -16    0.58    1.26
   2   0 -16   50.93    5.36
   2   0 -16   48.64    6.21
   1   0 -16    0.86    1.43
   1   0 -16   -0.98    0.90
  -1   0  16   -0.07    1.50
   0   0 -16  560.32   20.18
   0   0  16  555.25   17.14
   0   0  16  518.31   20.78
  -1   0 -16    0.80    1.45
   1   0  16    0.05    1.39
  -1   0 -16    0.87    0.77
   1   0  16   -0.23    0.89
   2   0  16 1268.54   39.79
  -2   0 -16 1291.68   38.41
   2   0  16 1273.76   35.80
   3   0  16    0.14    1.62
  -3   0 -16   -0.85    1.11
   4   0  16  169.76   10.84
  -4   0 -16  176.18    9.97
   4   0  16  180.44    7.45
  -5   0 -16    2.37    1.97
   5   0  16   -0.19    0.97
   5   0  16   -2.44    1.82
   6   0  16   -0.77    2.27
  -6   0 -16   -0.07    2.15
   7   0  16    0.63    2.60
  -7   0 -16   -1.14    2.34
  -8   0 -16    4.86    3.75
   8   0  16    3.55    3.57
  -8  -1  16   13.38    4.87
   8  -1 -16   10.20    4.96
   8   1 -16   11.21    4.96
  -7  -1  16    2.04    2.85
   7  -1 -16   -0.89    2.18
  -7   1  16    0.99    2.37
   7   1 -16   -2.85    2.15
   6  -1 -16   42.73    7.41
  -6  -1  16   51.04    8.16
   6   1 -16   35.82    7.10
  -6   1  16   37.72    6.59
   6   1 -16   34.57    6.18
  -5  -1  16  295.51   16.11
   5  -1 -16  281.86   15.21
   5   1 -16  269.97   14.88
   5   1 -16  299.95   15.68
  -5   1  16  283.82   15.30
   4  -1 -16    9.25    3.67
   4   1 -16   12.36    3.70
  -4   1  16   11.48    3.76
   4   1 -16   11.38    3.56
   3  -1 -16  476.92   17.29
   3  -1 -16  442.50   19.08
   3   1 -16  482.91   19.37
   3   1 -16  491.92   19.02
   2  -1 -16   57.85    6.86
  -2  -1  16   48.70    6.52
   2  -1 -16   54.67    5.04
   2   1 -16   46.96    5.44
   2   1 -16   45.03    5.79
  -1  -1  16  124.55    7.03
   1  -1 -16  125.28    8.20
  -1  -1  16  124.67    8.81
   1  -1 -16  130.38    6.10
   1   1 -16  121.59    7.31
  -1   1  16  118.11    8.50
   1   1 -16  130.49    8.25
   0  -1  16  217.72   11.60
   0  -1  16  203.62    9.43
   0  -1 -16  218.38   10.77
   0   1 -16  202.35   10.47
   0   1  16  194.08   11.00
   0   1 -16  193.68    6.27
  -1  -1 -16  102.75    6.97
   1  -1  16   87.77    5.93
  -1  -1 -16   93.21    5.53
   1  -1  16  111.56    7.90
   1   1  16   96.22    4.25
   1   1  16   92.24    8.87
  -1   1 -16   97.86    6.99
  -2  -1 -16   92.66    6.65
  -2  -1 -16   93.65    5.36
   2  -1  16   91.44    6.19
   2  -1  16   85.40    8.48
   2   1  16   95.12    8.82
  -2   1 -16   94.14    6.75
   3  -1  16  493.41   19.66
  -3  -1 -16  475.04   18.26
  -3   1 -16  465.83   18.19
   3   1  16  485.07   19.73
   3   1  16  476.01   15.88
   4  -1  16  120.38   10.57
  -4  -1 -16  116.85    7.94
   4   1  16  106.97   10.18
   4   1  16  108.07    6.05
  -4   1 -16  121.22    8.15
   5  -1  16  278.57   14.73
  -5  -1 -16  276.16   13.69
   5  -1  16  276.87    8.97
   5   1  16  293.12   15.35
  -5   1 -16  291.20   13.91
   5   1  16  276.40   10.77
  -6  -1 -16  347.45   16.34
   6  -1  16  367.70   17.84
  -6   1 -16  304.63   15.51
   6   1  16  347.44   17.68
  -7  -1 -16   80.90    9.14
   7  -1  16   65.98    9.29
  -7   1 -16   72.62    8.69
   7   1  16   66.48    9.37
  -8  -1 -16   30.86    6.57
   8  -1  16   40.07    7.59
   8   1  16   46.33    8.62
   8  -2 -16  725.95   31.87
  -8  -2  16  744.64   31.94
  -7  -2  16   47.78    7.97
   7  -2 -16   68.69    9.97
   7   2 -16   56.96    8.35
   6  -2 -16  164.41   14.48
  -6  -2  16  183.06   13.10
  -6   2  16  168.30   11.60
   6   2 -16  192.26   12.44
   5  -2 -16  326.41   17.00
  -5  -2  16  340.44   17.91
   5   2 -16  345.49   16.74
  -5   2  16  321.37   16.15
   5   2 -16  348.38   17.94
   4  -2 -16   69.99    8.51
  -4   2  16   75.95    8.38
   4   2 -16   67.00    7.65
   4   2 -16   77.15    8.63
   3  -2 -16   53.61    6.70
   3   2 -16   65.44    7.85
   3   2 -16   59.28    7.20
   2  -2 -16  303.95   11.39
   2  -2 -16  312.96   14.57
  -2  -2  16  334.08   13.98
  -2  -2  16  323.48   15.76
   2   2 -16  320.47   14.29
   2   2 -16  331.12   14.82
   1  -2 -16   19.31    2.21
  -1  -2  16   20.74    4.31
   1  -2 -16   17.39    3.67
  -1  -2  16   18.64    3.51
   1   2 -16   20.22    3.82
  -1   2  16   17.75    3.71
   1   2 -16   12.77    3.13
   0  -2  16 1229.46   39.36
   0  -2 -16 1282.91   38.31
   0  -2  16 1294.42   38.02
   0   2  16 1250.53   39.23
   0   2 -16 1268.86   38.16
  -1  -2 -16    1.29    1.66
  -1  -2 -16    1.34    1.44
   1  -2  16    2.02    1.68
   1  -2  16    1.15    1.60
  -1   2 -16    3.27    1.82
   1   2  16    0.00    1.55
  -2  -2 -16   57.82    5.59
   2  -2  16   68.03    7.36
   2  -2  16   65.61    6.75
   2  -2  16   60.97    3.35
  -2  -2 -16   47.62    5.49
  -2   2 -16   75.54    7.43
   2   2  16   58.19    2.83
   2   2  16   83.94    8.56
   3  -2  16   54.71    6.78
  -3  -2 -16   70.10    7.11
   3  -2  16   57.61    3.98
   3   2  16   70.81    6.10
   3   2  16   65.40    7.81
  -3   2 -16   68.41    7.01
   4  -2  16    9.60    3.44
  -4  -2 -16   10.61    2.99
  -4   2 -16    7.60    2.75
   4   2  16   10.72    2.56
   4   2  16    9.22    3.54
   5  -2  16   19.26    4.73
  -5  -2 -16   17.45    4.14
   5   2  16   11.34    4.01
  -5   2 -16   12.35    3.47
   5   2  16   11.76    2.90
  -6  -2 -16   21.43    4.94
   6  -2  16   18.77    5.23
  -6   2 -16   15.64    4.17
   6   2  16   16.16    4.61
  -7  -2 -16   33.33    6.21
   7  -2  16   41.38    7.39
   7   2  16   48.62    7.99
  -8  -2 -16   -2.70    2.72
   8  -2  16   10.06    4.45
  -8  -3  16    6.63    4.61
   8  -3 -16    3.35    3.61
  -7  -3  16    2.31    3.04
   7  -3 -16   11.68    4.60
  -6  -3  16    9.92    4.24
   6  -3 -16    9.23    3.94
   6   3 -16    7.04    3.52
  -5  -3  16  693.76   27.73
   5  -3 -16  637.81   26.08
   5   3 -16  652.14   25.00
  -5   3  16  628.34   24.28
   5   3 -16  631.22   27.58
   4  -3 -16  470.01   20.39
   4   3 -16  448.82   18.90
   4   3 -16  470.03   21.47
  -4   3  16  456.51   18.97
   3  -3 -16 1509.15   46.19
  -3   3  16 1509.45   45.12
   3   3 -16 1459.47   44.59
   3   3 -16 1526.85   47.48
  -2  -3  16  435.14   18.09
   2  -3 -16  432.85   18.08
  -2  -3  16  447.01   19.45
   2   3 -16  431.92   17.23
   2   3 -16  445.78   18.95
   2   3 -16  434.27   13.31
  -1  -3  16  118.63    8.48
  -1  -3  16  132.69    9.28
   1  -3 -16  144.53    8.89
   1  -3 -16  133.24    4.99
   1   3 -16  147.92    8.44
   1   3 -16  139.62    9.08
   0  -3  16   59.80    6.88
   0  -3  16   54.60    6.87
   0  -3 -16   49.31    5.88
   0   3 -16   52.08    6.05
   0   3  16   45.82    5.96
   1  -3  16   24.49    4.61
  -1  -3 -16   21.45    4.14
   1  -3  16   18.86    4.01
  -1  -3 -16   14.46    3.14
   1   3  16   13.67    2.89
   1   3  16   21.38    4.35
  -1   3 -16   16.87    3.46
  -2  -3 -16  248.96   12.03
   2  -3  16  272.51   13.49
  -2  -3 -16  288.83   12.53
   2  -3  16  245.73   12.77
   2  -3  16  251.34    7.93
  -2   3 -16  273.32   12.46
   2   3  16  261.68   11.68
   2   3  16  287.06   13.73
  -3  -3 -16  289.70   12.65
   3  -3  16  266.72   13.49
  -3  -3 -16  295.48   12.95
   3   3  16  280.70   12.28
   3   3  16  262.99    9.41
  -3   3 -16  269.11   12.78
   3   3  16  259.09   13.74
   4  -3  16  940.82   32.89
  -4  -3 -16 1028.77   32.27
   4   3  16  991.83   30.95
  -4   3 -16  977.25   32.01
   4   3  16 1028.10   34.41
  -5  -3 -16  336.14   15.39
   5  -3  16  339.86   16.35
   5   3  16  328.84   13.99
   5   3  16  298.09   16.22
  -5   3 -16  326.12   16.67
   6  -3  16  379.77   18.40
  -6  -3 -16  362.87   17.13
   6   3  16  351.94   18.59
  -7  -3 -16   14.86    4.92
   7  -3  16   13.42    4.83
   8  -3  16    9.01    4.07
  -8  -3 -16   19.04    5.32
   7  -4 -16  276.09   17.41
  -7  -4  16  292.19   18.21
  -6  -4  16   66.96    9.70
   6  -4 -16   82.67   10.62
  -5  -4  16   96.16   11.36
   5  -4 -16   97.57   10.41
   4  -4 -16  178.14   11.79
   4   4 -16  213.66   19.07
   4   4 -16  183.67   13.26
  -3  -4  16   44.81    7.01
   3  -4 -16   33.44    5.56
  -3   4  16   43.12    5.63
   3   4 -16   40.65    5.47
   3   4 -16   40.68    6.62
   2  -4 -16   20.67    4.47
  -2  -4  16   27.24    5.21
  -2  -4  16   17.80    4.57
   2   4 -16   26.54    4.42
   2   4 -16   39.65    6.48
  -1  -4  16  100.42    9.81
   1  -4 -16   92.27    8.32
  -1  -4  16   95.59    9.57
   1   4 -16   95.98    6.58
   1   4 -16   89.93    9.11
   0  -4 -16  155.99    9.21
   0  -4  16  147.95   10.17
   0  -4  16  159.59   10.05
   0   4  16  165.58    9.19
   0   4 -16  156.46    8.46
   1  -4  16  317.76   14.49
  -1  -4 -16  270.88   13.99
  -1  -4 -16  295.50   13.08
   1  -4  16  283.11   14.88
   1   4  16  319.60   13.69
  -1   4 -16  291.50   12.55
   1   4  16  283.40   13.44
   2  -4  16   24.41    5.09
   2  -4  16   25.92    4.54
  -2  -4 -16   27.01    4.68
  -2  -4 -16   25.77    4.32
  -2   4 -16   32.86    4.63
   2   4  16   28.79    5.05
   2   4  16   36.84    5.15
   3  -4  16   -0.90    1.44
  -3  -4 -16    1.18    1.59
  -3  -4 -16    1.80    2.01
   3  -4  16    4.66    2.62
   3   4  16    3.57    1.26
  -3   4 -16    1.95    1.97
   3   4  16    3.91    2.39
   3   4  16   -0.12    1.85
  -4  -4 -16   49.27    6.05
   4  -4  16   64.29    7.46
   4   4  16   56.42    8.43
   4   4  16   67.57    5.81
   4   4  16   55.23    6.59
   5  -4  16   16.96    4.30
  -5  -4 -16   17.07    4.23
   5   4  16   17.46    4.08
  -6  -4 -16   82.02    9.07
   6  -4  16   72.97    8.85
  -7  -4 -16   89.71   10.16
   7  -4  16  101.33   11.53
  -7  -5  16   13.63    5.76
   7  -5 -16   10.32    4.68
  -6  -5  16   12.99    5.28
   6  -5 -16    9.89    4.08
  -6   5  16    6.07    2.88
   5  -5 -16    5.88    3.66
  -5  -5  16    0.70    2.73
  -5   5  16    3.22    2.39
   4  -5 -16  798.10   29.77
  -4   5  16  787.02   27.62
   3  -5 -16   70.02    8.35
  -3   5  16   64.39    6.95
   3   5 -16   72.05    9.87
   2  -5 -16  526.26   21.32
  -2  -5  16  573.50   23.17
  -2  -5  16  521.17   23.03
   2   5 -16  580.23   24.42
  -2   5  16  522.14   20.62
  -1  -5  16  161.10   11.31
  -1  -5  16  137.63    9.90
   1  -5 -16  149.62    9.36
   1  -5 -16  144.93    6.12
  -1   5  16  135.00    9.03
   1   5 -16  131.99   11.71
   0  -5 -16   32.39    5.01
   0  -5  16   25.73    5.55
   0  -5  16   30.32    5.28
   0   5  16   28.78    4.90
   1  -5  16   69.54    7.60
   1  -5  16   67.41    8.83
  -1  -5 -16   75.18    7.34
  -1  -5 -16   78.48    8.84
   1   5  16   71.61    7.51
   2  -5  16   38.49    5.74
  -2  -5 -16   55.36    7.32
  -2  -5 -16   51.56    6.00
   2  -5  16   39.48    6.82
   2   5  16   53.44    6.80
  -3  -5 -16   27.30    5.38
  -3  -5 -16   18.37    3.84
   3  -5  16   24.01    4.86
   3   5  16   16.39    3.97
  -4  -5 -16  441.10   18.31
  -4  -5 -16  422.32   18.92
   4  -5  16  483.96   19.74
   4   5  16  446.66   19.20
  -5  -5 -16    1.80    2.35
   5  -5  16   10.30    3.62
   6  -5  16   15.37    4.63
  -6  -5 -16   19.43    4.60
   7  -5  16   18.34    5.51
  -7  -5 -16   19.19    5.13
   6  -6 -16  110.00   12.22
  -6  -6  16   81.33   10.88
  -6   6  16   81.91    9.13
  -5  -6  16    8.64    4.16
   5  -6 -16   14.18    4.52
  -5   6  16    5.44    2.87
   4  -6 -16   11.45    3.85
  -4   6  16   11.85    3.77
   3  -6 -16    0.97    2.14
  -3   6  16    2.69    2.47
   2  -6 -16    5.80    2.87
  -2  -6  16    7.52    3.60
  -2   6  16    9.59    3.28
   2   6 -16    9.60    4.16
  -1  -6  16   55.76    7.53
   1  -6 -16   43.16    4.18
   1  -6 -16   44.67    6.13
  -1   6  16   53.59    7.18
   0  -6 -16   -1.01    1.23
   0  -6 -16    0.28    1.83
   0  -6  16    0.13    2.27
   0   6  16    0.18    2.00
  -1  -6 -16   56.87    6.38
  -1  -6 -16   41.47    7.41
   1  -6  16   49.21    6.71
   1   6  16   41.01    6.52
   2  -6  16   29.20    5.03
  -2  -6 -16   29.96    5.86
  -2  -6 -16   27.17    4.63
   2   6  16   17.74    4.37
  -3  -6 -16   37.61    6.41
   3  -6  16   37.39    6.01
  -3  -6 -16   40.96    5.61
   3   6  16   36.49    6.33
  -4  -6 -16   30.85    5.07
   4  -6  16   32.65    5.65
  -4  -6 -16   32.02    5.86
   4   6  16   47.75    7.46
  -5  -6 -16  359.18   16.78
   5  -6  16  352.66   17.45
  -6  -6 -16   40.95    6.69
   6  -6  16   38.24    6.86
  -5  -7  16   -0.97    2.68
   5  -7 -16   -0.53    2.87
   4  -7 -16   81.14    9.52
  -4   7  16   84.56    9.87
   3  -7 -16   11.03    3.70
  -3   7  16    7.54    3.48
  -2  -7  16   12.39    4.42
   2  -7 -16   16.48    4.12
  -2   7  16    7.17    3.26
  -1  -7  16    8.72    3.52
   1  -7 -16    9.13    3.28
  -1   7  16    7.98    3.26
   0  -7  16   17.28    4.22
   0  -7 -16   20.67    4.24
   0   7  16   17.50    4.40
  -1  -7 -16    5.47    3.71
  -1  -7 -16    3.97    2.20
   1  -7  16    8.86    3.29
   1   7  16    5.12    2.90
   2  -7  16   21.46    4.57
  -2  -7 -16    9.89    3.16
  -2  -7 -16   20.83    5.67
   2   7  16   11.27    4.29
   3  -7  16   54.80    7.19
  -3  -7 -16   57.23    6.65
  -3  -7 -16   44.21    7.63
   3   7  16   47.76    7.71
  -4  -7 -16   37.64    7.04
  -4  -7 -16   33.07    5.59
   4  -7  16   36.82    6.22
   4   7  16   30.75    6.49
   5  -7  16    2.38    2.96
  -5  -7 -16   -2.57    1.86
   4  -8 -16   68.32    8.89
   3  -8 -16    5.42    3.15
   2  -8 -16  190.22   11.88
   1  -8 -16  298.74   14.78
  -1  -8  16  289.79   15.67
   0  -8  16   44.32    6.81
   0  -8 -16   38.13    5.71
   0  -8 -16   54.71    9.31
  -1  -8 -16   38.52    7.72
   1  -8  16   27.07    5.55
  -1  -8 -16   35.64    5.64
  -2  -8 -16    1.97    3.49
  -2  -8 -16    2.11    2.33
   2  -8  16    8.44    3.48
  -3  -8 -16    0.92    1.90
   3  -8  16   -1.22    2.04
  -3  -8 -16    0.32    3.39
  -4  -8 -16   14.99    4.13
   4  -8  16   13.26    4.12
  -4  -8 -16   23.79    6.10
   3  -9 -16   43.19    7.22
   2  -9 -16   30.70    6.03
   1  -9 -16   40.13    6.22
  -1  -9  16   42.96    7.35
   0  -9 -16   18.81    4.49
   0  -9 -16   14.93    5.42
   0  -9  16   14.93    4.42
  -1  -9 -16   11.41    3.52
  -1  -9 -16   15.09    5.50
   1  -9  16    7.25    3.56
  -2  -9 -16   16.49    5.72
   2  -9  16   24.48    5.35
  -2  -9 -16   24.19    4.84
  -3  -9 -16   18.77    4.62
  -3  -9 -16   29.46    7.14
   3  -9  16   28.34    5.65
  -8   0  17    3.26    3.50
   8   0 -17   -1.95    2.67
  -7   0  17  105.02   11.71
   7   0 -17   82.27   10.60
   6   0 -17    3.75    3.21
  -6   0  17   -2.30    1.98
   6   0 -17    2.60    2.55
   5   0 -17  640.77   25.72
  -5   0  17  702.45   27.72
   5   0 -17  718.78   27.42
   4   0 -17    0.17    1.64
   4   0 -17   -1.12    1.71
   3   0 -17    0.80    1.71
   3   0 -17    1.72    1.76
   2   0 -17    3.32    1.85
   2   0 -17   -0.05    1.26
  -1   0  17  154.11   10.27
   1   0 -17  179.27    8.34
   1   0 -17  171.70   10.03
   0   0  17    3.83    1.27
   0   0 -17    3.56    1.15
   0   0 -17    6.18    2.40
   0   0  17    5.79    2.47
  -1   0 -17  417.19   17.08
   1   0  17  452.62   18.71
   1   0  17  430.04   14.53
  -1   0 -17  424.11   13.30
   2   0  17   -1.44    0.83
  -2   0 -17    0.43    1.41
   2   0  17    0.52    1.62
   3   0  17  602.40   23.16
  -3   0 -17  579.11   21.46
  -4   0 -17    5.57    2.77
   4   0  17    0.84    1.10
   4   0  17   -0.21    1.81
   5   0  17   25.61    5.55
  -5   0 -17   26.87    5.08
   5   0  17   31.89    3.33
   6   0  17    2.04    2.71
  -6   0 -17    0.55    2.20
  -7   0 -17   10.37    3.99
   7   0  17    7.80    4.14
  -8   0 -17   -2.95    2.55
   8   0  17   -2.46    2.81
   8  -1 -17  417.89   22.58
  -8  -1  17  396.06   21.75
   8   1 -17  399.96   21.49
  -7  -1  17   15.99    4.85
   7  -1 -17   14.16    4.82
  -7   1  17   24.34    6.23
   7   1 -17    9.06    4.11
   6  -1 -17    0.17    2.44
  -6  -1  17    3.54    3.07
  -6   1  17    1.73    2.90
   6   1 -17   -0.12    2.40
   5  -1 -17   46.06    6.93
  -5  -1  17   31.68    6.71
  -5   1  17   57.00    8.08
   5   1 -17   49.81    7.31
   5   1 -17   46.95    7.31
   4  -1 -17  304.08   13.76
   4  -1 -17  289.28   15.23
   4   1 -17  288.68   14.86
   4   1 -17  298.86   15.09
   3  -1 -17  284.18   14.53
   3  -1 -17  288.81   12.54
   3   1 -17  298.30   14.20
   3   1 -17  299.54   14.55
   2  -1 -17  260.90   13.07
  -2  -1  17  255.25   13.86
   2  -1 -17  250.57   10.54
   2   1 -17  246.43   12.60
   2   1 -17  235.98   11.67
  -1  -1  17    7.66    2.96
  -1  -1  17    8.28    2.31
   1  -1 -17    8.65    2.78
   1  -1 -17    5.01    1.51
   1   1 -17   11.94    3.43
  -1   1  17    7.86    2.91
   1   1 -17    4.28    1.89
   0  -1  17   19.75    3.24
   0  -1 -17   10.20    2.95
   0  -1  17   19.38    4.30
   0   1 -17   11.87    3.01
   0   1 -17   16.34    1.56
   0   1  17   10.28    3.19
  -1  -1 -17  257.54   12.23
  -1  -1 -17  249.14   10.11
   1  -1  17  255.37   13.13
   1  -1  17  244.76   10.88
  -1   1 -17  263.50   12.40
   1   1  17  230.65   12.68
   1   1  17  251.66    8.33
  -2  -1 -17    3.29    1.41
  -2  -1 -17    5.68    2.36
   2  -1  17    8.47    2.88
   2  -1  17    3.40    1.74
   2   1  17    4.78    2.65
   2   1  17    4.81    1.48
  -2   1 -17    4.84    2.20
   3  -1  17    1.07    1.70
  -3  -1 -17    2.39    1.80
   3   1  17    1.34    2.05
  -3   1 -17    1.06    1.83
  -4  -1 -17    0.44    1.59
   4  -1  17   -0.11    1.74
  -4   1 -17    1.88    1.80
   4   1  17    3.35    2.59
   4   1  17    0.61    1.30
   5  -1  17   15.80    4.35
   5  -1  17   13.67    2.00
  -5  -1 -17   19.97    4.45
  -5   1 -17   19.47    4.16
   5   1  17   20.47    5.12
   5   1  17   17.58    2.99
  -6  -1 -17  141.66   10.18
   6  -1  17  153.66   13.52
   6   1  17  148.86   13.51
  -6   1 -17  141.99   10.09
   7  -1  17   37.55    7.12
  -7  -1 -17   26.63    5.86
   7   1  17   34.98    7.13
  -7   1 -17   33.61    6.20
   8  -1  17   26.98    6.71
  -8  -1 -17   35.53    6.80
   8   1  17   45.44    8.48
  -8  -2  17    1.06    3.95
   8  -2 -17    3.94    4.05
   7  -2 -17  119.34   12.92
  -7  -2  17   92.09   11.65
   7   2 -17  125.04   12.82
   6  -2 -17   27.53    6.03
  -6  -2  17   43.21    7.82
   6   2 -17   46.52    7.73
  -6   2  17   34.39    6.34
   5  -2 -17  389.01   18.80
  -5  -2  17  360.78   18.95
   5   2 -17  388.08   18.12
   5   2 -17  353.05   18.66
  -5   2  17  365.16   17.72
   4  -2 -17  116.05   11.08
  -4   2  17  126.17   11.37
   4   2 -17  109.26   11.02
   4   2 -17  122.42   10.97
   3  -2 -17  190.10   11.65
   3   2 -17  205.80   11.96
   3   2 -17  212.15   11.64
  -2  -2  17  538.80   21.91
   2  -2 -17  539.80   20.70
  -2  -2  17  508.51   19.08
   2  -2 -17  488.98   16.40
   2   2 -17  496.98   19.88
   2   2 -17  490.77   19.61
   1  -2 -17  226.30    8.03
  -1  -2  17  240.33   13.05
  -1  -2  17  236.02   11.37
   1  -2 -17  215.18   11.63
  -1   2  17  223.45   12.23
   1   2 -17  232.47   11.75
   1   2 -17  223.86   11.41
   0  -2  17   23.99    4.65
   0  -2  17   33.51    4.73
   0  -2 -17   24.19    4.21
   0   2 -17   34.20    5.22
   0   2  17   26.15    4.79
   1  -2  17  192.99   11.12
   1  -2  17  191.21   10.15
  -1  -2 -17  178.40    9.97
  -1  -2 -17  187.57    9.41
   1   2  17  185.80   10.99
  -1   2 -17  186.02   10.17
  -2  -2 -17    2.98    1.66
  -2  -2 -17    5.37    2.40
   2  -2  17    3.49    2.03
   2  -2  17    3.74    2.07
  -2   2 -17    5.74    2.47
   2   2  17    5.20    2.72
   3  -2  17  252.59   12.91
  -3  -2 -17  223.97   11.37
   3  -2  17  187.28    8.23
  -3   2 -17  204.97   11.01
   3   2  17  218.07    9.91
   3   2  17  196.91   12.00
  -4  -2 -17  205.46   10.97
   4  -2  17  172.56   11.25
  -4   2 -17  174.13   10.45
   4   2  17  197.45   12.13
   4   2  17  186.22    9.18
  -5  -2 -17    9.12    3.33
   5  -2  17    7.43    3.19
   5   2  17    9.03    2.62
  -5   2 -17    7.05    2.90
   5   2  17   10.23    4.01
  -6  -2 -17   24.25    5.06
   6  -2  17   34.41    6.57
   6   2  17   30.17    6.47
  -6   2 -17   28.78    5.56
   7  -2  17   21.86    5.70
  -7  -2 -17   41.60    7.38
   7   2  17   34.22    6.97
   8  -2  17   -1.89    2.85
  -8  -2 -17   -0.30    3.30
   7  -3 -17   -0.27    2.68
  -7  -3  17    1.43    2.87
   6  -3 -17  109.80   12.02
  -6  -3  17  113.71   12.61
   5  -3 -17   -0.69    1.98
  -5  -3  17    1.52    2.71
   5   3 -17   -1.96    2.39
   5   3 -17   -0.03    2.03
   4  -3 -17   86.08    9.42
   4   3 -17   88.36   10.40
   4   3 -17  106.05    9.71
  -4   3  17  100.93    9.51
   3  -3 -17  249.33   13.62
   3   3 -17  254.67   12.78
   3   3 -17  244.79   14.13
  -3   3  17  250.29   12.94
  -2  -3  17  703.31   27.62
   2  -3 -17  738.15   26.59
  -2  -3  17  764.46   26.62
   2   3 -17  736.75   20.64
   2   3 -17  756.25   25.71
   2   3 -17  739.14   27.21
   1  -3 -17    1.09    1.63
  -1  -3  17    2.81    2.18
  -1  -3  17    0.00    1.49
   1  -3 -17    1.19    0.70
   1   3 -17   -0.34    1.53
   1   3 -17    0.64    1.41
   0  -3  17  251.26   13.01
   0  -3  17  275.10   13.90
   0  -3 -17  256.74   12.63
   0   3  17  256.20   12.98
   0   3 -17  270.72   12.50
   1  -3  17   98.57    9.32
  -1  -3 -17   98.80    7.12
   1  -3  17   75.76    7.99
  -1  -3 -17   89.52    8.18
   1   3  17   86.99    8.84
  -1   3 -17   92.00    8.12
   1   3  17   86.83    6.30
   2  -3  17    8.06    2.97
  -2  -3 -17   10.17    2.89
  -2  -3 -17   10.93    2.88
   2  -3  17   17.88    3.97
   2   3  17   11.42    3.46
   2   3  17   12.19    2.95
  -2   3 -17   14.69    3.42
   3  -3  17    8.94    3.24
  -3  -3 -17    7.55    2.47
   3  -3  17   11.01    2.10
  -3  -3 -17   13.53    3.45
   3   3  17   10.79    3.41
  -3   3 -17   18.92    4.08
   3   3  17   15.63    3.33
   3   3  17   14.08    1.95
  -4  -3 -17   11.18    3.24
   4  -3  17   13.99    3.83
  -4   3 -17   20.98    4.37
   4   3  17   14.01    4.12
   4   3  17    7.94    2.76
  -5  -3 -17  152.98   10.08
   5  -3  17  142.69   10.48
   5   3  17  126.27   11.86
   5   3  17  153.03    8.93
   6  -3  17    3.50    2.93
  -6  -3 -17    2.77    2.64
  -7  -3 -17   15.53    4.63
   7  -3  17   12.97    4.94
  -7  -4  17  153.87   15.27
   7  -4 -17  145.94   14.69
   6  -4 -17   30.46    6.75
  -6  -4  17   36.09    7.20
   5  -4 -17   78.95    9.68
   4  -4 -17  373.11   17.86
   4   4 -17  317.23   18.29
   3  -4 -17  461.92   20.52
   3   4 -17  538.38   23.06
   3   4 -17  483.48   19.06
   2  -4 -17   12.28    3.54
  -2  -4  17    7.89    3.15
  -2  -4  17   17.50    4.66
   2   4 -17    7.95    2.74
   2   4 -17   18.68    4.68
   1  -4 -17  130.70    8.76
  -1  -4  17  107.87   10.39
  -1  -4  17  103.50   10.22
   1   4 -17  107.96   10.54
   1   4 -17  122.86    7.70
   0  -4 -17   68.06    7.21
   0  -4  17   85.66    8.92
   0  -4  17   84.78    8.86
   0   4  17   95.81    8.42
   0   4 -17   86.41    7.49
  -1  -4 -17  103.40    9.66
  -1  -4 -17  120.98    8.07
   1  -4  17  123.43   10.81
   1  -4  17  105.06   10.15
   1   4  17  108.44    9.61
  -1   4 -17  113.77    7.48
   1   4  17  111.38    7.73
   2  -4  17   40.66    5.94
  -2  -4 -17   43.79    6.25
   2  -4  17   45.89    6.96
  -2  -4 -17   34.12    5.09
   2   4  17   36.94    5.31
  -2   4 -17   50.38    5.89
   2   4  17   56.47    6.91
   3  -4  17   90.17    9.31
  -3  -4 -17   89.65    8.68
   3  -4  17   82.22    9.30
  -3  -4 -17   78.77    7.70
   3   4  17   90.55    8.22
   3   4  17   88.35    4.07
   3   4  17   92.42    9.42
  -4  -4 -17  229.34   12.32
   4  -4  17  233.35   13.26
   4   4  17  255.15   12.66
  -5  -4 -17    4.37    2.59
   5  -4  17    3.15    2.52
   5   4  17    3.93    2.37
   6  -4  17    6.79    3.56
  -6  -4 -17    5.40    3.28
  -7  -4 -17   -1.43    2.23
   7  -4  17   -0.04    2.73
   7  -5 -17   -1.25    2.88
  -7  -5  17    2.34    3.84
   6  -5 -17    0.55    2.68
  -6  -5  17    2.53    3.27
  -6   5  17    3.01    2.64
   5  -5 -17   -1.97    1.99
  -5   5  17    1.49    2.19
   4  -5 -17   42.64    6.93
  -4   5  17   52.16    6.98
   3  -5 -17    1.13    2.17
   3   5 -17   -2.03    2.25
  -3   5  17   -0.46    1.81
  -2  -5  17 1218.17   40.83
   2  -5 -17 1188.51   39.03
  -2   5  17 1193.80   38.06
   2   5 -17 1247.69   42.10
   1  -5 -17  178.81   10.77
  -1  -5  17  187.81   11.81
  -1  -5  17  187.53   12.50
   1  -5 -17  177.51    6.53
   1   5 -17  164.57   11.74
  -1   5  17  177.17   10.60
   0  -5  17  220.96   13.64
   0  -5 -17  212.14   11.45
   0  -5  17  202.53   12.16
   0   5  17  212.98   11.76
   1  -5  17   76.01    9.09
  -1  -5 -17   79.92    7.75
   1  -5  17   85.94    8.85
  -1  -5 -17   89.87    9.65
   1   5  17   77.14    8.23
  -2  -5 -17   51.75    7.10
  -2  -5 -17   50.97    6.19
   2  -5  17   42.32    7.15
   2  -5  17   45.63    6.37
   2   5  17   50.64    6.56
  -3  -5 -17    0.22    1.58
   3  -5  17    2.14    2.17
  -3  -5 -17    1.41    2.13
   3   5  17    0.85    2.03
   4  -5  17   61.76    7.70
  -4  -5 -17   71.71    8.10
  -4  -5 -17   52.46    6.56
   4   5  17   73.06    8.67
  -5  -5 -17    1.01    2.29
   5  -5  17    2.68    2.49
   5   5  17   -0.24    2.28
   6  -5  17  229.56   14.42
  -6  -5 -17  237.57   13.86
   7  -5  17    1.67    3.19
  -7  -5 -17   -0.96    2.58
  -6  -6  17   77.70   11.21
   6  -6 -17   87.90   11.22
  -5  -6  17  206.82   17.70
   5  -6 -17  197.17   13.67
  -5   6  17  188.29   12.07
   4  -6 -17    7.14    3.43
  -4   6  17    5.29    3.06
   3  -6 -17   35.70    6.38
  -3   6  17   37.57    6.30
  -2  -6  17  439.50   20.31
   2  -6 -17  398.10   18.45
  -2   6  17  425.85   18.81
  -1  -6  17  138.73   12.23
   1  -6 -17  151.59    9.92
  -1   6  17  142.10   10.01
   0  -6  17  414.93   18.53
   0  -6 -17  392.24   16.97
   0   6  17  372.31   17.75
  -1  -6 -17    4.76    3.56
  -1  -6 -17    1.34    2.28
   1  -6  17    5.98    2.83
   1   6  17    7.18    3.38
  -2  -6 -17   41.83    5.83
  -2  -6 -17   47.21    7.71
   2  -6  17   48.25    6.74
   2   6  17   40.86    6.46
  -3  -6 -17   22.98    4.58
  -3  -6 -17   22.77    5.34
   3  -6  17   14.94    4.31
   3   6  17   13.19    4.04
  -4  -6 -17   93.61    9.83
   4  -6  17   89.41    9.51
  -4  -6 -17  116.77   10.28
   4   6  17   87.68    9.69
  -5  -6 -17   22.52    4.81
   5  -6  17   22.27    5.30
   6  -6  17    0.72    2.59
  -6  -6 -17   -1.82    2.23
  -5  -7  17   63.63    9.68
   5  -7 -17   62.82    9.12
   4  -7 -17  127.24   12.21
   3  -7 -17   63.24    8.38
  -3   7  17   54.52    8.72
   2  -7 -17  240.54   13.51
  -2  -7  17  250.78   14.87
  -2   7  17  213.06   13.59
   1  -7 -17  159.68   10.38
  -1  -7  17  135.89   12.39
  -1   7  17  128.89   11.84
   0  -7  17   18.70    4.55
   0  -7 -17   16.35    4.01
   0   7  17   12.78    4.10
  -1  -7 -17   75.61    7.87
   1  -7  17   70.38    8.36
  -1  -7 -17   95.73   11.37
   1   7  17   49.74    7.49
  -2  -7 -17    9.22    4.25
   2  -7  17   10.72    3.54
  -2  -7 -17    5.94    2.87
   2   7  17    7.80    3.70
   3  -7  17    8.48    3.22
  -3  -7 -17    1.42    3.10
  -3  -7 -17   10.32    3.43
   3   7  17    1.83    2.66
   4  -7  17   23.35    5.34
  -4  -7 -17   27.16    5.15
  -4  -7 -17   30.13    6.27
  -5  -7 -17   38.74    6.44
   5  -7  17   30.36    6.18
   4  -8 -17  251.99   15.37
   3  -8 -17   56.36    8.16
   2  -8 -17    7.02    3.44
   1  -8 -17   98.95   10.03
  -1  -8  17  117.85   11.51
   0  -8  17    5.17    3.06
   0  -8 -17   -0.10    2.34
   0  -8 -17    0.33    3.19
   1  -8  17    3.27    2.32
  -1  -8 -17    0.84    3.09
  -1  -8 -17   -1.72    1.85
   2  -8  17   70.92    8.76
  -2  -8 -17   78.75   10.45
  -2  -8 -17   91.12    8.86
  -3  -8 -17   19.37    4.71
   3  -8  17    9.92    4.00
  -3  -8 -17   13.41    5.08
  -4  -8 -17   12.49    4.64
  -4  -8 -17   15.96    4.36
   4  -8  17    3.99    3.06
   2  -9 -17   58.26    8.00
  -1  -9  17   56.19    8.21
   1  -9 -17   48.80    7.20
   0  -9 -17   11.69    5.22
   0  -9 -17   15.27    4.34
   0  -9  17    5.66    3.59
   1  -9  17    5.09    2.98
  -1  -9 -17    5.13    2.85
  -1  -9 -17    3.58    4.46
  -2  -9 -17    3.27    4.03
  -2  -9 -17   16.98    4.38
   2  -9  17   11.29    4.00
  -8   0  18    8.58    4.62
   8   0 -18    5.60    4.45
  -7   0  18    1.96    2.56
   7   0 -18    0.27    2.99
   6   0 -18  276.82   16.05
  -6   0  18  259.92   15.88
   6   0 -18  244.68   15.25
   5   0 -18   -1.39    1.65
   5   0 -18   -3.09    1.66
  -5   0  18    0.13    2.62
   4   0 -18  101.49    9.56
   4   0 -18  118.70   11.29
   3   0 -18   -1.70    1.13
   3   0 -18   -2.29    1.18
   2   0 -18 4951.83  127.01
  -1   0  18   -0.36    1.65
   1   0 -18   -0.36    0.99
   1   0 -18   -0.67    1.46
   0   0 -18 1349.64   36.32
   0   0  18 1324.30   42.34
   0   0 -18 1333.68   40.94
   0   0  18 1335.10   36.81
   1   0  18    1.26    1.14
  -1   0 -18    0.62    0.85
   1   0  18   -0.02    1.77
  -1   0 -18   -1.25    1.06
   2   0  18   10.63    2.36
  -2   0 -18   14.70    3.57
   2   0  18    6.28    2.95
  -3   0 -18   -0.37    1.61
   3   0  18   -0.57    1.99
  -4   0 -18  719.97   26.25
   4   0  18  747.85   22.27
   4   0  18  768.89   28.48
   5   0  18    1.38    1.32
  -5   0 -18    3.13    2.49
   5   0  18    1.45    2.25
  -6   0 -18  437.09   19.39
   6   0  18  429.23   20.93
   7   0  18    0.73    2.86
  -7   0 -18    0.75    2.62
   8   0  18   11.01    4.77
  -8   0 -18   10.50    4.38
   8  -1 -18   51.20    9.57
  -8  -1  18   48.86    9.00
   8   1 -18   37.24    7.59
  -7  -1  18  158.47   15.05
   7  -1 -18  140.97   13.91
  -7   1  18  155.22   14.52
   7   1 -18  185.87   16.00
  -6  -1  18   23.39    5.81
   6  -1 -18   21.34    5.41
   6  -1 -18   11.59    4.21
  -6   1  18   23.03    5.37
   6   1 -18   18.41    5.15
   5  -1 -18   22.48    4.64
  -5  -1  18   26.19    6.07
   5  -1 -18   15.36    4.30
   5   1 -18   10.39    3.87
   5   1 -18   16.20    4.58
  -5   1  18   18.06    4.78
   4  -1 -18    2.61    2.58
   4  -1 -18    2.25    1.97
   4   1 -18    4.15    2.54
   4   1 -18    1.29    2.32
   3  -1 -18  101.44   10.01
   3  -1 -18  107.66    7.21
   3   1 -18  107.81   10.22
   3   1 -18  109.49    9.60
  -2  -1  18    6.45    2.87
   2  -1 -18    8.02    3.02
   2  -1 -18    6.42    2.17
   2   1 -18    6.74    2.83
   2   1 -18    2.89    1.98
  -1  -1  18  113.89    6.93
   1  -1 -18  119.04    8.53
   1  -1 -18  115.80    5.97
  -1  -1  18  133.58    9.67
   1   1 -18  130.22    7.68
   1   1 -18  121.51    8.49
  -1   1  18  114.57   10.49
   0  -1  18  217.81   10.13
   0  -1 -18  234.30   12.04
   0  -1  18  225.53   12.74
   0   1 -18  221.60    6.95
   0   1  18  224.70   12.58
   0   1 -18  227.10   11.86
  -1  -1 -18   22.62    4.34
   1  -1  18   26.52    3.93
  -1  -1 -18   27.18    3.56
   1  -1  18   25.77    5.00
   1   1  18   24.13    2.37
  -1   1 -18   26.71    4.67
   1   1  18   41.44    6.49
   2  -1  18    6.38    2.73
  -2  -1 -18   10.00    2.22
  -2  -1 -18   10.44    3.02
   2  -1  18    6.90    2.30
   2   1  18    7.73    2.98
  -2   1 -18   13.65    3.47
   2   1  18    9.05    1.87
   3  -1  18  106.39   10.39
  -3  -1 -18  115.51    8.09
   3   1  18  119.62   10.83
  -3   1 -18  103.98    9.24
   4  -1  18   99.11   10.07
  -4  -1 -18  126.93    8.85
   4   1  18  115.29    6.57
   4   1  18  122.93   11.50
  -4   1 -18  121.83    8.63
   5  -1  18   88.29   10.00
   5   1  18   97.08   10.58
   5   1  18   75.06    5.26
  -5   1 -18   71.92    8.03
   6  -1  18  199.59   13.54
  -6  -1 -18  210.24   12.59
   6   1  18  198.94   13.64
  -6   1 -18  204.04   12.57
  -7  -1 -18   37.12    6.89
   7  -1  18   29.51    6.60
   7   1  18   26.65    6.26
  -7   1 -18   40.76    6.98
   8  -1  18    0.13    3.25
  -8  -1 -18   -0.89    3.15
   8   1  18    1.45    3.87
   8  -2 -18   -1.36    3.35
  -8  -2  18   -0.08    3.62
  -7  -2  18   26.58    6.60
   7  -2 -18   28.03    6.89
   7   2 -18   22.87    6.31
  -6  -2  18   90.51   11.14
   6  -2 -18   89.46   10.81
  -6   2  18   85.06    9.90
   6   2 -18   81.01    9.91
   5  -2 -18    3.95    3.17
  -5  -2  18   -0.43    2.36
  -5   2  18    2.37    2.57
   5   2 -18    2.69    2.81
   5   2 -18    2.28    2.94
   4  -2 -18   -2.77    1.52
  -4   2  18   -1.62    1.63
   4   2 -18    0.54    2.03
   4   2 -18    1.93    2.50
   3  -2 -18   19.36    4.34
   3  -2 -18   26.88    3.94
   3   2 -18   21.35    4.47
   3   2 -18   22.76    4.91
  -2  -2  18  538.16   23.29
   2  -2 -18  591.77   18.49
   2  -2 -18  588.74   22.65
   2   2 -18  568.77   21.90
   2   2 -18  569.04   21.96
   1  -2 -18  220.12    7.92
  -1  -2  18  222.34   11.24
   1  -2 -18  231.08   12.27
  -1  -2  18  237.22   13.30
  -1   2  18  215.55   12.35
   1   2 -18  221.76   11.44
   1   2 -18  216.45   11.68
   0  -2  18  250.11   11.97
   0  -2  18  239.38   13.24
   0  -2 -18  250.39   12.53
   0   2  18  224.21   12.68
   0   2 -18  221.69   11.89
   1  -2  18  833.09   29.44
  -1  -2 -18  836.28   26.48
  -1  -2 -18  796.29   27.61
   1  -2  18  817.05   27.41
   1   2  18  837.46   29.42
  -1   2 -18  831.95   28.05
  -2  -2 -18   89.38    6.04
  -2  -2 -18   81.09    7.91
   2  -2  18   81.37    7.90
   2  -2  18   75.78    8.35
   2   2  18   71.84    8.38
  -2   2 -18   86.28    8.35
   3  -2  18  243.24    9.85
   3  -2  18  283.92   14.45
  -3  -2 -18  280.60   13.26
  -3   2 -18  268.48   13.24
   3   2  18  273.90   14.58
   3   2  18  250.53   11.29
   4  -2  18  471.16   20.62
  -4  -2 -18  493.60   19.51
   4   2  18  479.28   21.12
  -4   2 -18  462.07   19.28
   4   2  18  446.86   16.87
   5  -2  18   36.88    6.54
  -5  -2 -18   24.99    5.17
  -5   2 -18   23.49    4.94
   5   2  18   26.24    3.98
   5   2  18   36.43    6.67
  -6  -2 -18   23.27    5.39
   6  -2  18   29.51    6.20
  -6   2 -18   25.66    7.77
   6   2  18   42.85    7.91
  -7  -2 -18   -2.71    2.33
   7  -2  18    0.35    3.11
   7   2  18    1.29    3.47
   7  -3 -18   29.63    6.83
  -7  -3  18   30.28    6.96
   6  -3 -18    6.73    3.93
  -6  -3  18   -1.79    2.34
   5  -3 -18  108.98   11.79
   5   3 -18   67.65    8.41
   4  -3 -18   39.62    6.57
   4   3 -18   59.36    7.58
  -4   3  18   63.22    7.82
   4   3 -18   38.12    7.12
   3  -3 -18  259.15   14.19
   3   3 -18  265.57   13.45
   3   3 -18  239.67   14.27
   2  -3 -18   87.49    4.96
   2  -3 -18   92.58    9.39
  -2  -3  18   73.56    7.84
  -2  -3  18   85.72    9.65
   2   3 -18  103.79    9.43
   2   3 -18   83.80    4.11
   2   3 -18   80.72    8.79
  -1  -3  18  272.21   13.67
   1  -3 -18  271.92   13.71
  -1  -3  18  260.33   14.44
   1   3 -18  280.75   13.90
   1   3 -18  277.33   13.17
   0  -3  18  143.04    9.95
   0  -3 -18  124.30    8.66
   0  -3  18  135.52    9.21
   0   3  18  135.16    9.22
   0   3 -18  130.09    8.52
   1  -3  18   15.30    4.07
  -1  -3 -18    8.48    2.95
   1  -3  18    8.69    3.09
  -1  -3 -18   12.84    3.46
   1   3  18    9.43    3.09
  -1   3 -18   11.43    3.27
  -2  -3 -18   19.16    4.06
   2  -3  18   20.05    4.43
  -2  -3 -18   18.45    3.77
   2  -3  18   17.86    4.06
   2   3  18   20.57    4.67
   2   3  18   15.78    3.32
  -2   3 -18   18.49    3.87
   3  -3  18   65.48    7.97
  -3  -3 -18   54.02    6.18
  -3  -3 -18   51.62    6.57
   3  -3  18   50.11    6.83
   3   3  18   53.29    7.26
   3   3  18   50.24    5.67
  -3   3 -18   48.86    6.43
   3   3  18   54.90    3.12
  -4  -3 -18   15.91    3.68
   4  -3  18   19.21    4.66
   4   3  18   14.56    4.60
   4   3  18   18.61    3.90
  -4   3 -18   16.20    4.14
   5  -3  18  175.36   11.91
  -5  -3 -18  171.70   10.97
   5   3  18  178.83   12.60
   5   3  18  162.67    9.60
  -6  -3 -18    9.45    3.71
   6  -3  18    1.94    2.84
   7  -3  18  574.54   25.88
  -7  -3 -18  547.31   24.05
   7  -4 -18   35.27    7.76
  -7  -4  18   62.71   10.05
   6  -4 -18   18.84    5.56
  -6  -4  18    6.91    4.29
   5  -4 -18    6.04    3.23
   4  -4 -18   -0.43    2.15
   4   4 -18    1.96    3.05
   3  -4 -18    2.14    2.54
   3   4 -18   -0.78    1.86
   3   4 -18   -0.05    2.12
   2  -4 -18   10.68    3.47
  -2  -4  18   13.44    4.35
  -2  -4  18   11.05    3.85
   2   4 -18   18.26    3.92
   2   4 -18   19.38    4.88
  -1  -4  18   30.30    5.59
   1  -4 -18   22.03    4.46
  -1  -4  18   32.32    5.94
   1   4 -18   27.09    4.57
   1   4 -18   22.17    4.97
   0  -4  18  556.59   22.87
   0  -4  18  576.84   22.95
   0  -4 -18  506.50   20.86
   0   4 -18  572.20   20.37
   0   4  18  562.45   20.74
   1  -4  18   54.27    7.04
   1  -4  18   62.07    7.75
  -1  -4 -18   60.51    6.81
  -1  -4 -18   62.97    7.66
   1   4  18   63.74    7.69
   1   4  18   68.50    7.44
  -1   4 -18   52.97    6.25
  -2  -4 -18    0.21    1.93
  -2  -4 -18    0.34    1.53
   2  -4  18    0.76    2.05
   2  -4  18    0.58    1.94
  -2   4 -18    1.68    1.93
   2   4  18   -1.95    1.26
   2   4  18   -0.63    2.03
  -3  -4 -18  184.01   10.61
   3  -4  18  166.86   11.05
  -3  -4 -18  182.49   10.60
   3  -4  18  177.12   12.06
   3   4  18  166.10   11.38
   3   4  18  167.24   10.10
  -4  -4 -18  244.05   13.00
   4  -4  18  263.44   14.40
   4   4  18  233.71   12.45
  -5  -4 -18    1.20    2.37
   5  -4  18    0.32    2.21
   5   4  18    0.72    1.86
  -6  -4 -18   36.23    6.44
   6  -4  18   33.81    6.59
   7  -4  18    3.01    3.53
  -7  -4 -18    5.26    3.58
   6  -5 -18   21.07    5.80
  -6  -5  18   15.78    5.91
  -6   5  18   25.73    5.22
   5  -5 -18  428.61   21.29
   4  -5 -18   -1.92    1.68
  -4   5  18    3.21    2.49
   3  -5 -18    2.45    2.83
   3   5 -18    3.29    3.20
  -3   5  18   -0.27    1.72
  -2  -5  18  194.59   12.98
   2  -5 -18  208.80   12.36
   2   5 -18  196.38   13.40
  -2   5  18  186.86   11.11
   1  -5 -18  977.44   33.16
  -1  -5  18 1002.95   35.80
  -1  -5  18 1047.23   35.40
  -1   5  18  987.70   32.86
   1   5 -18  930.62   34.91
   0  -5  18    6.87    3.29
   0  -5 -18    7.00    2.92
   0  -5  18    2.26    2.62
   0   5  18    8.03    3.05
   1  -5  18   43.00    6.52
  -1  -5 -18   61.86    7.12
  -1  -5 -18   46.76    6.96
   1  -5  18   53.80    7.85
   1   5  18   72.16    7.92
   2  -5  18   25.98    5.24
  -2  -5 -18   38.68    6.49
  -2  -5 -18   42.29    5.74
   2   5  18   31.65    5.40
  -3  -5 -18    7.18    2.96
  -3  -5 -18   10.10    3.63
   3  -5  18    9.85    3.68
   3   5  18   11.86    3.75
   4  -5  18   77.80    9.00
  -4  -5 -18   73.95    7.85
  -4  -5 -18   82.82    8.95
   4   5  18   86.39    8.95
  -5  -5 -18  154.89   10.71
   5  -5  18  138.50   12.72
   5   5  18  173.73   11.24
  -6  -5 -18  176.48   12.08
   6  -5  18  140.30   13.44
   6  -6 -18    4.55    3.83
  -6  -6  18   -1.08    3.16
   5  -6 -18   -1.53    2.43
   4  -6 -18   15.75    4.75
  -4   6  18    9.31    3.31
   3  -6 -18  118.18   11.36
  -3   6  18   90.24    9.37
  -2  -6  18    8.61    3.95
   2  -6 -18    0.39    2.28
  -2   6  18    5.32    2.80
  -1  -6  18  190.30   12.73
   1  -6 -18  199.77   11.91
  -1   6  18  190.47   11.99
   0  -6  18  718.02   27.84
   0  -6 -18  719.14   26.41
   0   6  18  744.10   27.60
   1  -6  18   27.88    5.54
  -1  -6 -18   19.02    5.38
  -1  -6 -18   24.86    4.73
   1   6  18   30.31    5.81
   2  -6  18    1.77    2.37
  -2  -6 -18    0.75    2.68
  -2  -6 -18    1.34    2.21
   2   6  18   -1.70    1.58
  -3  -6 -18   -0.91    2.35
   3  -6  18   -0.34    2.10
  -3  -6 -18   -3.33    1.51
   3   6  18    1.70    2.45
  -4  -6 -18  192.10   12.62
   4  -6  18  204.38   12.96
  -4  -6 -18  190.58   11.66
   4   6  18  191.71   12.62
  -5  -6 -18   11.28    3.96
   5  -6  18    4.81    3.12
   6  -6  18    0.88    2.63
  -6  -6 -18    1.55    2.86
  -5  -7  18   36.15    7.98
   5  -7 -18   31.17    6.84
   4  -7 -18    7.25    3.90
   3  -7 -18  203.93   13.20
  -2  -7  18  160.44   14.37
   2  -7 -18  160.32   11.21
   1  -7 -18  220.48   12.92
  -1  -7  18  240.82   14.46
  -1   7  18  218.97   14.01
   0  -7 -18   12.34    3.87
   0  -7  18   15.68    4.53
   0  -7 -18   12.34    4.73
   0   7  18   10.33    3.77
  -1  -7 -18    1.15    2.34
   1  -7  18    5.96    3.03
  -1  -7 -18    5.34    3.72
   1   7  18    4.32    3.01
  -2  -7 -18  115.23   12.39
  -2  -7 -18   96.75    9.13
   2  -7  18   82.51    9.43
   2   7  18   98.38   11.11
  -3  -7 -18    3.02    2.79
   3  -7  18    2.66    3.12
  -3  -7 -18   -1.36    2.36
  -4  -7 -18   -1.00    2.35
   4  -7  18    0.68    2.58
  -4  -7 -18   -1.25    2.04
  -5  -7 -18   66.09    8.58
   5  -7  18   63.25    9.17
   4  -8 -18   60.66    8.83
   3  -8 -18   58.86    8.55
   2  -8 -18   13.31    4.19
  -1  -8  18  463.47   21.83
   1  -8 -18  468.55   20.60
   0  -8  18   10.08    3.98
   0  -8 -18    6.48    3.49
   0  -8 -18   16.95    6.01
  -1  -8 -18    2.59    3.97
  -1  -8 -18    4.92    2.73
   1  -8  18    2.02    2.83
  -2  -8 -18   47.68    6.74
  -2  -8 -18   38.53    7.99
   2  -8  18   51.19    7.81
  -3  -8 -18   10.08    4.83
   3  -8  18    7.64    3.47
  -3  -8 -18   11.31    3.99
  -4  -8 -18   11.25    4.07
   4  -8  18   11.20    4.70
  -4  -8 -18    7.90    4.15
   2  -9 -18  293.87   16.16
   1  -9 -18   74.52    9.02
  -1  -9  18   74.47    9.67
   0  -9 -18   -2.38    2.05
   0  -9 -18    1.62    3.57
   0  -9  18    0.34    2.31
  -1  -9 -18   14.90    4.30
   1  -9  18    5.16    3.24
  -1  -9 -18    1.66    3.95
  -2  -9 -18   18.10    4.82
   2  -9  18    9.95    4.05
  -2  -9 -18   16.50    6.35
   8   0 -19   -2.47    2.82
  -8   0  19    0.02    3.25
  -7   0  19  235.51   15.87
   7   0 -19  252.00   16.34
  -6   0  19   -1.89    2.33
   6   0 -19   -1.48    2.41
  -5   0  19  479.41   22.67
   5   0 -19  498.23   22.27
   5   0 -19  483.60   21.31
   4   0 -19   -0.99    1.48
   4   0 -19   -1.04    2.09
   3   0 -19    0.37    1.78
   3   0 -19    3.34    2.10
   2   0 -19   -0.11    1.51
   2   0 -19    3.56    2.47
   1   0 -19   41.61    6.21
   1   0 -19   38.50    4.44
  -1   0  19   42.65    6.58
   0   0  19   -0.06    1.80
   0   0 -19    3.27    1.26
   0   0 -19    6.78    2.68
   0   0  19    2.17    1.13
  -1   0 -19  188.43   10.83
   1   0  19  167.07    7.98
   1   0  19  174.10   11.39
  -1   0 -19  184.70    7.17
   2   0  19   -0.89    0.87
  -2   0 -19   -0.37    1.46
   2   0  19   -0.26    1.53
   3   0  19   10.64    3.41
  -3   0 -19   14.12    3.57
  -4   0 -19    0.85    2.08
   4   0  19   -0.16    2.14
   4   0  19    0.03    1.17
   5   0  19   13.41    4.74
  -5   0 -19   21.78    4.97
   5   0  19   17.15    3.02
  -6   0 -19   -2.32    2.08
   6   0  19   -0.45    2.89
  -7   0 -19    5.73    3.66
   7   0  19    3.24    3.45
   7  -1 -19   12.39    4.95
  -7  -1  19   26.88    6.91
   7   1 -19   17.69    5.57
  -7   1  19   13.12    5.01
  -6  -1  19    6.53    3.69
   6  -1 -19    6.55    3.93
   6  -1 -19    5.10    3.02
  -6   1  19    1.80    2.73
   6   1 -19    4.70    3.39
   5  -1 -19   12.82    4.41
  -5  -1  19    8.70    3.89
   5  -1 -19    4.89    2.75
   5   1 -19    4.67    3.04
   5   1 -19    4.69    3.26
  -5   1  19    6.85    3.34
   4  -1 -19  389.96   18.98
   4  -1 -19  417.89   17.29
   4   1 -19  386.24   18.22
   4   1 -19  409.37   18.92
   3  -1 -19  627.87   24.95
   3  -1 -19  621.48   22.08
   3   1 -19  649.57   24.16
   3   1 -19  655.94   24.99
   2  -1 -19 1503.98   45.87
   2  -1 -19 1450.37   41.35
  -2  -1  19 1439.77   47.01
   2   1 -19 1448.04   43.62
   2   1 -19 1472.43   45.29
  -1  -1  19   84.67    5.90
   1  -1 -19   81.35    4.97
   1  -1 -19   89.64    9.03
  -1  -1  19   82.66    8.95
   1   1 -19   72.93    6.96
   1   1 -19   87.11    9.00
  -1   1  19   79.74    9.13
   0  -1 -19   16.27    3.73
   0  -1  19   20.37    3.42
   0  -1  19   15.40    4.17
   0   1  19   20.07    4.53
   0   1 -19   19.39    1.73
   0   1 -19   20.45    4.22
  -1  -1 -19   27.59    4.91
   1  -1  19   27.70    5.47
   1  -1  19   32.17    4.39
  -1  -1 -19   27.22    3.61
  -1   1 -19   19.66    4.26
   1   1  19   29.05    2.68
   1   1  19   26.59    5.04
  -2  -1 -19   66.64    7.51
   2  -1  19   43.62    6.71
  -2  -1 -19   60.57    4.45
   2  -1  19   64.02    6.41
   2   1  19   60.69    8.07
  -2   1 -19   55.21    6.63
   2   1  19   63.24    4.02
  -3  -1 -19  217.17   11.81
   3  -1  19  197.37   12.42
   3   1  19  241.29   13.70
  -3   1 -19  199.67   11.54
   4  -1  19   11.45    4.14
  -4  -1 -19   14.60    3.84
   4   1  19    8.35    2.41
  -4   1 -19   13.63    3.85
   4   1  19    8.35    3.37
   5  -1  19   13.37    4.32
  -5  -1 -19    7.25    3.54
  -5   1 -19    7.38    3.23
   5   1  19    9.30    3.90
   5   1  19   10.66    2.66
  -6  -1 -19  454.80   20.42
   6  -1  19  458.05   22.23
  -6   1 -19  510.98   21.37
   6   1  19  435.62   22.12
  -7  -1 -19   51.55    8.02
   7  -1  19   35.58    7.17
   7   1  19   33.69    7.33
  -7   1 -19   35.46    8.33
  -7  -2  19  212.67   15.50
   7  -2 -19  192.97   17.42
   6  -2 -19   74.41   10.11
  -6  -2  19   55.97    8.98
   6   2 -19   60.95    8.49
   5  -2 -19   98.53   10.72
   5   2 -19  103.82   11.55
   5   2 -19  139.31   12.19
  -5   2  19   98.35   10.73
   4  -2 -19   14.56    3.55
   4  -2 -19   20.43    4.85
  -4   2  19   19.09    4.63
   4   2 -19   14.00    4.48
   4   2 -19   28.21    5.60
   3  -2 -19  261.61   14.58
   3  -2 -19  291.58   12.15
   3   2 -19  280.31   14.70
   3   2 -19  261.46   14.12
  -2  -2  19   55.91    7.71
   2  -2 -19   50.01    6.68
   2  -2 -19   62.55    5.25
   2   2 -19   59.03    6.93
   2   2 -19   59.89    7.12
   1  -2 -19  153.99   10.25
  -1  -2  19  165.90   11.43
  -1  -2  19  162.82    9.59
   1  -2 -19  178.07    6.67
  -1   2  19  164.79   10.91
   1   2 -19  173.21   10.44
   1   2 -19  158.00    9.62
   0  -2 -19   72.35    7.55
   0  -2  19   75.23    7.35
   0  -2  19   67.57    8.46
   0   2 -19   83.06    8.36
   0   2  19   65.04    8.05
   1  -2  19  522.00   21.31
  -1  -2 -19  461.47   19.08
  -1  -2 -19  485.64   17.69
   1  -2  19  445.64   18.36
  -1   2 -19  469.33   19.21
   1   2  19  466.57   20.32
   2  -2  19   69.34    8.32
   2  -2  19   82.40    8.13
  -2  -2 -19   63.94    6.16
  -2  -2 -19   76.71    7.77
   2   2  19   69.34    8.29
  -2   2 -19   74.44    8.08
   3  -2  19   97.70    9.21
   3  -2  19  111.52   10.47
  -3  -2 -19  102.18    9.41
  -3   2 -19   93.13    9.11
   3   2  19   87.48    9.64
   3   2  19   94.08    6.43
  -4  -2 -19  313.00   15.21
   4  -2  19  300.61   16.18
   4   2  19  320.73   13.20
  -4   2 -19  315.54   15.32
   4   2  19  300.45   16.61
  -5  -2 -19    2.48    2.35
   5  -2  19    5.55    3.21
   5   2  19   -3.04    2.29
   5   2  19    1.76    1.78
  -5   2 -19    3.89    2.62
  -6  -2 -19    4.30    3.07
   6  -2  19    4.00    3.84
   6   2  19    8.31    4.06
   7  -2  19   82.91   10.71
  -7  -2 -19   71.61    9.34
   7   2  19   90.11   17.28
  -7  -3  19   51.59    9.15
   7  -3 -19   35.77    7.79
   6  -3 -19   42.95    7.78
  -6  -3  19   48.65    8.65
   5  -3 -19   21.76    5.38
   5   3 -19   56.22    7.93
   4  -3 -19  236.61   14.39
   4   3 -19  261.79   14.09
   4   3 -19  238.03   14.98
  -4   3  19  231.07   13.46
   3  -3 -19 2649.72   76.46
   3   3 -19 2737.10   77.49
   3   3 -19 2617.68   74.65
   2  -3 -19 1531.55   40.74
  -2  -3  19 1517.35   46.18
   2  -3 -19 1452.53   46.68
  -2  -3  19 1528.70   48.95
   2   3 -19 1413.06   45.25
   2   3 -19 1590.84   47.78
  -1  -3  19  121.11    8.87
   1  -3 -19  128.83    9.27
  -1  -3  19  101.70   10.45
   1   3 -19  137.03    9.35
   1   3 -19  126.99    8.69
   0  -3  19    4.97    2.88
   0  -3  19    5.02    2.61
   0  -3 -19    8.88    3.21
   0   3  19    3.63    2.74
   0   3 -19    3.42    2.32
   1  -3  19  151.12   10.43
  -1  -3 -19  124.48    8.57
  -1  -3 -19  132.85    8.97
   1  -3  19  128.57    9.29
   1   3  19  128.33   11.49
  -1   3 -19  136.01    8.92
  -2  -3 -19   48.84    6.20
  -2  -3 -19   47.29    5.95
   2  -3  19   61.89    7.55
   2  -3  19   47.01    6.72
   2   3  19   51.67    5.76
  -2   3 -19   43.81    6.03
   2   3  19   57.98    7.54
  -3  -3 -19   54.58    6.60
   3  -3  19   65.54    8.38
   3  -3  19   72.55    8.30
  -3  -3 -19   59.19    6.35
  -3   3 -19   75.68    8.22
   3   3  19   53.93    7.87
   3   3  19   54.54    6.25
   4  -3  19  148.76   12.85
  -4  -3 -19  102.47    9.62
   4   3  19  130.63    8.35
   4   3  19  125.43   12.05
  -4   3 -19  114.78   10.44
   5  -3  19  288.96   16.03
  -5  -3 -19  246.99   13.89
   5   3  19  268.59   12.78
   5   3  19  251.27   15.59
  -6  -3 -19  480.67   21.27
   6  -3  19  460.19   22.35
   7  -3  19  176.67   15.76
  -7  -3 -19  155.97   13.70
  -7  -4  19  305.17   19.53
   7  -4 -19  287.62   18.64
   6  -4 -19   97.37   11.59
  -6  -4  19  113.85   13.51
   5  -4 -19   85.65   10.38
   4  -4 -19   37.00    6.79
   3  -4 -19   87.98    9.60
   3   4 -19  101.08   11.44
   2  -4 -19  284.89   15.13
  -2  -4  19  309.57   16.76
  -2  -4  19  292.87   15.47
   2   4 -19  301.73   14.13
   2   4 -19  279.11   15.80
   1  -4 -19   15.28    4.33
  -1  -4  19    8.82    3.82
  -1  -4  19   18.59    4.32
   1   4 -19   15.91    3.83
   1   4 -19   13.20    4.11
   0  -4  19   12.14    3.86
   0  -4  19   12.50    3.85
   0  -4 -19    9.57    3.16
   0   4 -19   12.17    3.15
   0   4  19    6.19    2.46
  -1  -4 -19  213.20   12.21
   1  -4  19  195.09   12.58
  -1  -4 -19  218.38   11.85
   1  -4  19  209.04   12.71
   1   4  19  206.37   11.26
   1   4  19  205.72   12.07
  -1   4 -19  207.85   11.15
  -2  -4 -19   48.01    6.53
   2  -4  19   47.09    7.03
  -2  -4 -19   35.65    5.59
   2  -4  19   44.00    7.21
   2   4  19   74.84    7.75
   2   4  19   52.81    7.27
  -3  -4 -19   52.15    6.81
   3  -4  19   51.81    7.57
  -3  -4 -19   46.42    6.14
   3  -4  19   52.89    7.40
   3   4  19   54.49    6.82
   4  -4  19   23.74    5.25
  -4  -4 -19   27.64    5.19
   4   4  19   32.37    5.46
  -5  -4 -19   28.03    5.42
   5  -4  19   25.04    5.61
   5   4  19   24.12    4.71
   6  -4  19   88.28   10.35
  -6  -4 -19   80.12    9.19
   7  -4  19  130.05   13.72
  -7  -4 -19  149.72   13.77
   6  -5 -19  100.79   12.26
  -6  -5  19   85.79   11.90
   5  -5 -19   15.20    5.24
   4  -5 -19   97.51   11.07
   3  -5 -19 1155.12   39.67
  -3   5  19 1164.51   37.81
   2  -5 -19  634.72   25.08
  -2  -5  19  605.95   26.16
   2   5 -19  613.16   26.53
  -2   5  19  628.32   23.77
   1  -5 -19   85.14    9.03
  -1  -5  19   78.75    9.72
   1   5 -19   76.84    9.61
  -1   5  19   71.42    7.85
   0  -5  19    7.57    3.90
   0  -5  19   14.55    4.12
   0  -5 -19   13.67    3.93
   0   5  19   12.29    3.84
  -1  -5 -19   12.87    4.32
   1  -5  19   18.63    4.72
  -1  -5 -19   18.16    4.34
   1   5  19    9.74    3.13
   2  -5  19   48.48    7.21
  -2  -5 -19   46.57    7.20
  -2  -5 -19   43.92    6.16
   2   5  19   46.46    6.46
  -3  -5 -19   23.84    4.85
  -3  -5 -19   27.02    5.26
   3  -5  19   17.73    4.69
   3   5  19   12.61    3.92
   4  -5  19    0.33    2.45
  -4  -5 -19    1.06    2.26
  -4  -5 -19    3.43    2.50
   4   5  19   -1.57    1.97
   5  -5  19   69.22    8.95
  -5  -5 -19   75.45    8.38
   5   5  19   52.12    7.37
   6  -5  19   86.83   10.71
  -6  -5 -19  114.75   11.57
  -6  -6  19  294.50   19.22
   5  -6 -19   23.08    6.00
   4  -6 -19  301.47   17.18
   3  -6 -19    4.23    3.17
  -3   6  19    1.23    2.22
   2  -6 -19  278.50   15.27
  -2  -6  19  284.32   16.45
  -2   6  19  260.91   14.57
   1  -6 -19   36.66    6.30
  -1  -6  19   29.78    6.06
  -1   6  19   39.71    6.46
   0  -6 -19    0.76    2.09
   0  -6  19    1.85    2.56
   0   6  19    0.35    1.79
  -1  -6 -19  126.84   12.74
   1  -6  19  135.13   12.26
  -1  -6 -19  129.06    9.45
   1   6  19  139.46   12.32
  -2  -6 -19    0.03    2.40
   2  -6  19    1.87    2.54
  -2  -6 -19    0.45    2.00
   2   6  19    0.21    2.07
   3  -6  19   19.17    5.02
  -3  -6 -19   37.60    6.92
  -3  -6 -19   24.16    4.99
   3   6  19   24.47    5.54
   4  -6  19   37.47    6.80
  -4  -6 -19   30.77    5.68
  -4  -6 -19   38.88    6.54
   4   6  19   31.02    6.22
  -5  -6 -19  199.12   12.47
   5  -6  19  177.24   12.96
   5   6  19  166.92   12.28
  -6  -6 -19   86.97    9.96
   6  -6  19   73.24   10.15
  -5  -7  19   19.77    6.29
   5  -7 -19   23.04    5.90
   4  -7 -19   46.38    8.11
   3  -7 -19  114.84   11.74
   2  -7 -19   31.97    6.16
  -2  -7  19   20.09    5.71
   1  -7 -19  167.48   11.63
  -1  -7  19  180.32   12.83
   0  -7  19   32.43    6.50
   0  -7 -19   22.80    5.03
   0  -7 -19   28.74    6.79
   1  -7  19   18.99    5.04
  -1  -7 -19    9.23    3.60
  -1  -7 -19    7.56    4.11
   2  -7  19    6.25    3.38
  -2  -7 -19    9.76    3.74
  -2  -7 -19   10.22    4.54
   3  -7  19   34.05    6.40
  -3  -7 -19   34.23    6.09
  -3  -7 -19   29.30    6.55
  -4  -7 -19   39.33    6.45
   4  -7  19   34.74    6.79
  -4  -7 -19   32.23    6.78
   5  -7  19   13.96    4.86
  -5  -7 -19   22.16    5.29
   3  -8 -19   35.06    6.75
   2  -8 -19  135.46   12.73
   1  -8 -19   34.73    6.28
  -1  -8  19   18.46    5.16
   0  -8 -19   84.83   11.89
   0  -8  19   69.26    9.29
   0  -8 -19   77.43    8.94
  -1  -8 -19   44.45    8.62
  -1  -8 -19   44.78    6.65
   1  -8  19   57.85    8.58
   2  -8  19  117.61   12.13
  -2  -8 -19  117.71   11.06
  -2  -8 -19  114.22   13.29
  -3  -8 -19   11.44    4.04
   3  -8  19    5.87    3.55
  -3  -8 -19   10.03    4.69
   1  -9 -19  113.45   11.20
  -1  -9  19   97.29   11.44
   0  -9 -19   15.00    6.06
   0  -9  19   17.51    4.91
   0  -9 -19   12.25    4.20
  -1  -9 -19   41.79    9.22
  -1  -9 -19   47.24    7.33
   1  -9  19   50.32    7.99
   7   0 -20   -1.14    2.50
  -7   0  20   -5.17    2.45
   6   0 -20   19.30    5.56
  -6   0  20   14.06    5.30
   5   0 -20   -0.83    1.93
  -5   0  20    2.65    2.63
   5   0 -20    1.66    2.81
   4   0 -20   53.41    7.09
   4   0 -20   70.55    8.97
   3   0 -20   -3.39    1.19
   3   0 -20   -1.16    1.72
   2   0 -20  536.06   21.77
   2   0 -20  496.82   18.80
   1   0 -20    1.26    1.40
  -1   0  20    2.10    2.08
   1   0 -20   10.01    2.96
   0   0 -20  193.84    8.06
   0   0 -20  192.81   11.53
   0   0  20  192.50   12.40
   0   0  20  193.13    8.47
  -1   0 -20    1.49    0.94
  -1   0 -20   -0.82    1.48
   1   0  20    1.70    2.17
   1   0  20    2.67    1.37
   2   0  20   23.42    5.27
   2   0  20   17.52    3.12
  -2   0 -20   18.29    4.22
   3   0  20    1.13    1.56
   3   0  20    2.62    2.52
  -3   0 -20   -0.09    1.98
   4   0  20  136.53   12.53
  -4   0 -20  145.97   10.02
   5   0  20    2.16    2.54
  -5   0 -20   -0.02    2.16
   6   0  20  230.99   15.33
  -6   0 -20  217.38   13.61
  -7   0 -20    0.43    3.04
   7   0  20    3.44    3.62
   7  -1 -20  157.04   15.78
  -7  -1  20  163.80   15.97
  -7   1  20  160.41   22.79
   7   1 -20  175.75   16.17
  -6  -1  20    0.42    3.07
   6  -1 -20    3.43    3.24
  -6   1  20    0.75    2.65
   6   1 -20    3.99    3.27
   5  -1 -20   31.02    6.35
   5  -1 -20   40.15    6.18
  -5  -1  20   29.10    6.52
  -5   1  20   31.61    6.71
   5   1 -20   36.13    6.61
   5   1 -20   36.59    6.55
   4  -1 -20   25.62    4.86
   4  -1 -20   30.53    6.20
   4   1 -20   25.22    5.33
   4   1 -20   34.63    6.52
   3  -1 -20   30.99    4.59
   3  -1 -20   32.96    6.03
   3   1 -20   27.33    5.38
   3   1 -20   28.50    5.05
   2  -1 -20   42.80    6.62
  -2  -1  20   37.25    6.68
   2  -1 -20   41.77    4.84
   2   1 -20   31.54    5.41
   2   1 -20   42.49    5.73
   1  -1 -20  569.39   18.24
  -1  -1  20  577.30   19.99
  -1  -1  20  641.55   25.13
   1  -1 -20  544.91   22.56
   1   1 -20  584.59   20.68
  -1   1  20  592.49   24.07
   1   1 -20  547.84   22.36
   0  -1  20   23.49    3.65
   0  -1  20   19.18    4.94
   0  -1 -20   16.48    3.96
   0  -1 -20   27.25    3.91
   0   1 -20   21.53    1.65
   0   1 -20   23.93    4.83
   0   1  20   18.65    4.54
   1  -1  20  183.07   12.02
  -1  -1 -20  178.49    8.38
   1  -1  20  174.56    9.25
  -1  -1 -20  171.03   10.78
   1   1  20  175.24    6.56
   1   1  20  166.55   11.47
  -1   1 -20  184.94   10.99
  -2  -1 -20   36.06    4.06
  -2  -1 -20   32.48    5.45
   2  -1  20   31.38    4.59
   2  -1  20   47.58    7.46
   2   1  20   40.80    6.65
  -2   1 -20   31.25    5.28
   2   1  20   31.61    3.35
   3  -1  20   14.35    3.50
   3  -1  20   11.16    3.91
  -3  -1 -20   15.20    3.81
  -3   1 -20   13.30    3.75
   3   1  20   12.98    4.19
   3   1  20   15.42    2.80
  -4  -1 -20   12.25    3.82
   4  -1  20   16.50    4.46
  -4   1 -20   16.44    4.21
   4   1  20    6.18    3.34
   4   1  20   14.76    2.92
  -5  -1 -20  250.97   14.07
   5  -1  20  249.83   15.32
   5   1  20  238.01   10.66
   5   1  20  235.20   15.02
  -5   1 -20  257.94   14.07
   6  -1  20    8.31    4.19
  -6  -1 -20   12.32    4.25
  -6   1 -20    9.39    4.10
   6   1  20    2.80    3.42
   7  -1  20    2.82    3.89
  -7  -1 -20   -1.15    2.65
   7   1  20    2.78    3.95
   7  -2 -20   57.77    9.34
  -7  -2  20   50.01    9.50
   6  -2 -20   20.99    5.58
  -6  -2  20   33.15    7.77
   6   2 -20   22.47    5.77
   5  -2 -20  151.73   13.88
   5  -2 -20  126.26    9.35
   5   2 -20  136.13   13.43
  -5   2  20  144.55   13.54
   5   2 -20  141.40   12.74
   4  -2 -20  376.26   16.00
   4  -2 -20  364.62   18.66
  -4   2  20  350.32   18.12
   4   2 -20  394.03   18.43
   4   2 -20  391.15   19.14
   3  -2 -20  116.32   11.25
   3  -2 -20  125.25    7.69
   3   2 -20  132.02   11.51
   3   2 -20  139.73    9.98
   2  -2 -20   -0.20    1.28
  -2  -2  20   -1.15    1.86
   2  -2 -20    1.42    2.50
   2   2 -20    0.95    2.11
   2   2 -20    0.74    1.89
   1  -2 -20    1.29    1.06
  -1  -2  20    6.02    2.82
  -1  -2  20    3.97    2.06
   1  -2 -20   11.65    3.47
   1   2 -20    3.78    2.66
   1   2 -20    1.79    2.02
  -1   2  20    3.65    2.53
   0  -2 -20  275.54   14.49
   0  -2  20  310.22   14.08
   0  -2  20  300.76   15.97
   0   2  20  314.19   15.91
   0   2 -20  289.55   14.46
   1  -2  20    0.91    1.74
  -1  -2 -20    2.96    1.67
   1  -2  20   -2.17    1.69
  -1  -2 -20    0.02    1.69
   1   2  20   -1.92    1.40
  -1   2 -20    0.68    1.88
  -2  -2 -20    2.48    1.66
   2  -2  20    0.99    1.92
  -2  -2 -20    2.34    2.08
   2  -2  20    0.13    2.22
   2   2  20    3.38    2.86
  -2   2 -20    1.49    2.35
  -3  -2 -20    0.87    2.03
   3  -2  20   -0.51    1.79
   3  -2  20    4.79    2.53
   3   2  20    4.81    3.18
   3   2  20    2.39    1.77
  -3   2 -20    3.69    2.70
   3   2  20   -0.09    1.10
   4  -2  20  157.62   11.51
  -4  -2 -20  140.37   10.07
   4   2  20  175.20   12.24
  -4   2 -20  157.11   10.59
   4   2  20  150.02    8.63
   5  -2  20   37.88    7.12
  -5  -2 -20   29.14    5.63
  -5   2 -20   29.69    5.60
   5   2  20   23.86    5.94
   5   2  20   26.87    4.26
   6  -2  20  153.11   14.49
  -6  -2 -20  152.87   11.18
   6   2  20  146.48   14.29
   7  -2  20  134.12   14.13
  -7  -2 -20  153.82   13.60
  -7  -3  20  489.33   25.44
   7  -3 -20  449.59   24.09
  -6  -3  20  117.58   13.85
   6  -3 -20  103.07   12.34
   5  -3 -20  183.74   13.31
   4  -3 -20  118.22   12.08
   4   3 -20   90.20   10.79
  -4   3  20   91.81   11.31
   4   3 -20   95.24    9.83
   3  -3 -20    3.87    2.66
   3  -3 -20    1.47    1.58
   3   3 -20   11.87    4.11
   3   3 -20    8.20    3.31
  -2  -3  20   12.84    3.55
   2  -3 -20   13.48    4.16
   2  -3 -20   16.25    2.59
  -2  -3  20   12.34    4.29
   2   3 -20   28.81    5.49
   2   3 -20   10.43    3.66
  -1  -3  20   -0.29    2.29
  -1  -3  20    1.34    1.85
   1  -3 -20    1.61    2.13
   1   3 -20    2.54    2.16
   1   3 -20    1.22    1.89
   0  -3  20    9.17    3.31
   0  -3 -20    8.64    3.15
   0  -3  20    8.51    3.34
   0   3  20    7.00    3.24
   0   3 -20    8.51    3.25
   1  -3  20  294.94   15.80
  -1  -3 -20  280.63   13.61
  -1  -3 -20  282.55   14.29
   1  -3  20  289.53   14.69
   1   3  20  265.53   14.71
  -1   3 -20  293.41   14.21
  -2  -3 -20   35.72    5.33
   2  -3  20   31.02    5.51
  -2  -3 -20   36.09    5.64
[truncated: 76,343 more chars]
